# Supplementary material for: The reaction between HgBr and O3: kinetic study and atmospheric implications
Source: Royal Society of Chemistry journal article supplement (doi:10.1039/d2cp00754a), 2022-01-01
Supplement: d2cp00754a1.xlsx [file d2cp00754a1.xlsx]

## Sheet: Experimental Conditions
DATA SUMMARY						SPREADSHEET HEADERS
Dataset #	P /Torr	E/mJ pulse-1	O3 photolysed fraction	[O3]0/1014 molecule cm-3		HgBr xxx	HgBr xxx	<- Data identifier
1	5	45	0.5	0.5 – 5.5		[O3]0/molecule cm-3	XXX	<- [O3]0 = Initial ozone concentration
2	30	41.5	0.49	0 .5– 5.5		pf	XXX	<- ∆[O3]/[O3]0 = Ozone photolysed fraction
3	60	38	0.46	0.2 – 5.5		t/us	HgBr LIF Signal	<- LIF data
4	17	6	0.1	0.4 – 5
5	30	6-50	0.10-0.54	4.6
6	17	6	0.09	0.2 – 4.5
7	17	14	0.21	0.2 – 4.5
8	17	43	0.51	0.2 – 4.5
9	17	33	0.41	0.2 – 4.4
10	17	23	0.3	0.2– 4.6
11	17	6-36	0.10-0.44	4.6

## Sheet: Dataset 1
HgBr 15092021 3	HgBr 15092021 3	HgBr 15092021 4	HgBr 15092021 4	HgBr 15092021 5	HgBr 15092021 5	HgBr 15092021 7	HgBr 15092021 7	HgBr 15092021 10	HgBr 15092021 10	HgBr 15092021 11	HgBr 15092021 11	HgBr 15092021 12	HgBr 15092021 12	HgBr 15092021 13	HgBr 15092021 13	HgBr 15092021 14	HgBr 15092021 14	HgBr 15092021 15	HgBr 15092021 15	HgBr 15092021 16	HgBr 15092021 16	HgBr 15092021 17	HgBr 15092021 17	HgBr 15092021 19	HgBr 15092021 19	HgBr 15092021 20	HgBr 15092021 20
[O3]0/molecule cm-3	571030000000000	[O3]0/molecule cm-3	324245000000000	[O3]0/molecule cm-3	691145000000000	[O3]0/molecule cm-3	0	[O3]0/molecule cm-3	139194000000000	[O3]0/molecule cm-3	388087000000000	[O3]0/molecule cm-3	72192900000000	[O3]0/molecule cm-3	36396200000000	[O3]0/molecule cm-3	214258000000000	[O3]0/molecule cm-3	119281000000000	[O3]0/molecule cm-3	113145000000000	[O3]0/molecule cm-3	106972000000000	[O3]0/molecule cm-3	112262000000000	[O3]0/molecule cm-3	105972000000000
pf	0.5	pf	0.5	pf	0.5	pf	0	pf	0.5	pf	0.5	pf	0.5	pf	0.5	pf	0.5	pf	0.5	pf	0.5	pf	0.5	pf	0.5	pf	0.5
t/us	HgBr LIF Signal	t/us	HgBr LIF Signal	t/us	HgBr LIF Signal	t/us	HgBr LIF Signal	t/us	HgBr LIF Signal	t/us	HgBr LIF Signal	t/us	HgBr LIF Signal	t/us	HgBr LIF Signal	t/us	HgBr LIF Signal	t/us	HgBr LIF Signal	t/us	HgBr LIF Signal	t/us	HgBr LIF Signal	t/us	HgBr LIF Signal	t/us	HgBr LIF Signal
-100.021	-1.70536e-05	-100.021	-1.04107e-05	-100.021	-4.23571e-05	-100	1.2e-05	-99.99	-4.31538e-05	-95	-1.86e-05	-99.99	-7.66e-05	-100	-5.34e-05	-100.01	2.4e-05	-100	-3.38e-05	-100	7.83333e-06	-100	-3.66667e-05	-100	-2.81667e-05	-100	-1.53333e-05
-96.317	1.11964e-05	-96.317	-4.34107e-05	-96.317	-5.35714e-06	0	-1.2e-05	-90.9	-1.31538e-05	-90	1.24e-05	-88.88	-3.56e-05	-75	-6.74e-05	-90.91	-1.8e-05	-80	-2.38e-05	-80	-1.66667e-07	-80	4.33333e-06	-80	8.33333e-07	-80	-3.33333e-05
-92.6125	-2.23036e-05	-92.6125	-1.69107e-05	-92.6125	-1.53571e-05	75.377	0.018259	-81.81	1.28462e-05	-85	6.4e-06	-77.77	-4.36e-05	-50	-2.64e-05	-81.81	-1e-05	-60	-9.8e-06	-60	-2.41667e-05	-60	-8.66667e-06	-60	-4.11667e-05	-60	-3.53333e-05
-88.908	-1.45536e-05	-88.908	9.95893e-05	-88.908	7.76429e-05	150.754	0.026242	-72.72	-1.11538e-05	-80	-1.96e-05	-66.66	3.4e-06	-25	-1.64e-05	-72.71	-2.4e-05	-40	-4.18e-05	-40	5.83333e-06	-40	-1.76667e-05	-40	-2.16667e-06	-40	8.66667e-06
-85.2035	-1.55536e-05	-85.2035	3.15893e-05	-85.2035	-1.93571e-05	226.131	0.026689	-63.63	-2.71538e-05	-75	2.64e-05	-55.55	-4.26e-05	0	-0.0001114	-63.61	9e-06	-20	2.52e-05	-20	-3.81667e-05	-20	9.33333e-06	-20	5.83333e-06	-20	7.66667e-06
-81.499	-5.98036e-05	-81.499	2.58929e-06	-81.499	-5.35714e-06	301.508	0.024945	-54.54	-2.81538e-05	-70	-5.6e-06	-44.44	-4.6e-06	10.05	0.0090326	-54.51	-1e-06	0	-1.38e-05	0	-3.16667e-06	0	2.33333e-06	0	-4.11667e-05	0	-2.03333e-05
-77.7945	9.19643e-06	-77.7945	-2.74107e-05	-77.7945	-2.35714e-06	376.884	0.026293	-45.45	3.18462e-05	-65	-2.56e-05	-33.33	-3.26e-05	20.101	0.0148546	-45.41	2.8e-05	7.538	0.0028702	7.538	0.00323583	7.538	0.00283033	7.538	0.00244583	7.538	0.00213767
-74.09	-3.05536e-05	-74.09	-6.91071e-06	-74.09	7.76429e-05	452.261	0.025283	-36.36	6.84615e-06	-60	-2.26e-05	-22.22	-1.36e-05	30.151	0.0132416	-36.31	-6e-06	15.075	0.0084652	15.075	0.0109378	15.075	0.00800933	15.075	0.00811483	15.075	0.00633867
-70.3855	-1.40536e-05	-70.3855	-4.19107e-05	-70.3855	4.76429e-05	527.638	0.023728	-27.27	1.18462e-05	-55	-9.6e-06	-11.11	-2.96e-05	40.201	0.0126156	-27.21	1.4e-05	22.613	0.0098842	22.613	0.0121588	22.613	0.00959233	22.613	0.00994983	22.613	0.00757967
-66.681	3.69643e-06	-66.681	1.80893e-05	-66.681	1.06429e-05	603.015	0.02563	-18.18	-6.31538e-05	-50	6.4e-06	0	-0.0001276	50.251	0.0132146	-18.11	-1e-05	30.151	0.0093212	30.151	0.0118148	30.151	0.00983533	30.151	0.00922583	30.151	0.00652167
-62.9765	-1.20536e-05	-62.9765	2.45893e-05	-62.9765	2.06429e-05	678.392	0.024728	-9.09	8.84615e-06	-45	-6.6e-06	5.025	0.0068494	60.302	0.0117606	-9.01	-2.1e-05	37.688	0.0091362	37.688	0.0109388	37.688	0.00880233	37.688	0.00881583	37.688	0.00633667
-59.272	-1.73036e-05	-59.272	3.80893e-05	-59.272	7.46429e-05	753.769	0.023745	0	1.84615e-06	-40	4e-07	10.05	0.0101634	70.352	0.0114596	0	2.4e-05	45.226	0.0085702	45.226	0.0101718	45.226	0.00879233	45.226	0.00838783	45.226	0.00676667
-55.5675	1.76964e-05	-55.5675	-1.69107e-05	-55.5675	3.46429e-05	829.146	0.023092	4.02	0.00190185	-35	-7.6e-06	15.075	0.0101604	80.402	0.0125536	4.02	0.001893	52.764	0.0083952	52.764	0.00987683	52.764	0.00786533	52.764	0.00785383	52.764	0.00561767
-51.863	-3.55536e-05	-51.863	2.95893e-05	-51.863	-4.23571e-05	904.523	0.022998	8.04	0.00751685	-30	3.4e-06	20.101	0.0105424	90.452	0.0126056	8.04	0.00702	60.302	0.0066052	60.302	0.00932283	60.302	0.00759133	60.302	0.00775383	60.302	0.00563867
-48.1585	7.59464e-05	-48.1585	-5.41071e-06	-48.1585	-3.53571e-05	979.899	0.022176	12.06	0.00936385	-25	3.4e-06	25.126	0.0103044	100.503	0.0115356	12.06	0.008526	67.839	0.0074042	67.839	0.00903683	67.839	0.00670033	67.839	0.00748783	67.839	0.00538167
-44.454	-3.30536e-05	-44.454	-3.69107e-05	-44.454	3.46429e-05	1055.28	0.022019	16.08	0.00919785	-20	-3.86e-05	30.151	0.0088654	110.553	0.0115566	16.08	0.00831	75.377	0.0069722	75.377	0.00873683	75.377	0.00686133	75.377	0.00658883	75.377	0.00518767
-40.7495	2.41964e-05	-40.7495	-7.04107e-05	-40.7495	3.76429e-05	1130.65	0.020074	20.101	0.00962285	-15	-2.66e-05	35.176	0.0090994	120.603	0.0112596	20.101	0.00821	82.915	0.0065062	82.915	0.00841983	82.915	0.00674133	82.915	0.00633383	82.915	0.00496267
-37.045	4.19643e-06	-37.045	-1.19107e-05	-37.045	3.46429e-05	1206.03	0.021189	24.121	0.00908785	-10	-1.6e-06	40.201	0.0088474	130.653	0.0104356	24.121	0.006778	90.452	0.0061202	90.452	0.00793183	90.452	0.00618033	90.452	0.00603883	90.452	0.00448167
-33.3405	2.76964e-05	-33.3405	-1.54107e-05	-33.3405	2.46429e-05	1281.41	0.01999	28.141	0.00786385	-5	1.34e-05	45.226	0.0089004	140.704	0.0101916	28.141	0.006555	97.99	0.0060952	97.99	0.00750483	97.99	0.00565433	97.99	0.00579783	97.99	0.00453867
-29.636	-3.05536e-05	-29.636	-5.19107e-05	-29.636	4.64286e-06	1356.78	0.020025	32.161	0.00847785	0	1.84e-05	50.251	0.0089404	150.754	0.0101346	32.161	0.006219	105.528	0.0059562	105.528	0.00789883	105.528	0.00593033	105.528	0.00581583	105.528	0.00426867
-25.9315	-3.08036e-05	-25.9315	-4.89107e-05	-25.9315	1.76429e-05	1432.16	0.020148	36.181	0.00751885	2.513	0.0020304	55.276	0.0084174	160.804	0.0107616	36.181	0.006313	113.065	0.0054812	113.065	0.00766383	113.065	0.00576133	113.065	0.00527483	113.065	0.00399767
-22.227	9.19643e-06	-22.227	1.10893e-05	-22.227	-5.53571e-05	1507.54	0.018008	40.201	0.00775185	5.025	0.0052514	60.302	0.0085184	170.854	0.0106366	40.201	0.006297	120.603	0.0056372	120.603	0.00707983	120.603	0.00562933	120.603	0.00591983	120.603	0.00428867
-18.5225	6.74464e-05	-18.5225	-3.84107e-05	-18.5225	1.06429e-05	1582.92	0.017431	44.221	0.00683785	7.538	0.0063464	65.327	0.0084744	180.905	0.0100486	44.221	0.005553	128.141	0.0050212	128.141	0.00673883	128.141	0.00503733	128.141	0.00513983	128.141	0.00378767
-14.818	-1.30357e-06	-14.818	3.60893e-05	-14.818	-1.53571e-05	1658.29	0.019735	48.241	0.00673885	10.05	0.0052864	70.352	0.0078734	190.955	0.0092186	48.241	0.006064	135.678	0.0048072	135.678	0.00625883	135.678	0.00532133	135.678	0.00529883	135.678	0.00336467
-11.1135	3.79464e-05	-11.1135	-5.69107e-05	-11.1135	-8.23571e-05	1733.67	0.017682	52.261	0.00744985	12.563	0.0059284	75.377	0.0078704	201.005	0.0096046	52.261	0.005233	143.216	0.0048352	143.216	0.00627783	143.216	0.00472933	143.216	0.00502183	143.216	0.00323767
-7.409	-3.33036e-05	-7.409	2.60893e-05	-7.409	-9.23571e-05	1809.05	0.018143	56.281	0.00620685	15.075	0.0051054	80.402	0.0075824	211.055	0.0096506	56.281	0.004554	150.754	0.0045092	150.754	0.00598383	150.754	0.00468533	150.754	0.00502183	150.754	0.00350967
-3.7045	1.51964e-05	-3.7045	-5.41071e-06	-3.7045	-2.23571e-05	1884.42	0.017624	60.302	0.00622185	17.588	0.0049174	85.427	0.0079144	221.106	0.0085586	60.302	0.004913	158.291	0.0039042	158.291	0.00588683	158.291	0.00430633	158.291	0.00475483	158.291	0.00321167
0	-0.000162304	0	-0.000201911	0	-0.000212357	1959.8	0.016649	64.322	0.00602085	20.101	0.0045164	90.452	0.0075574	231.156	0.0092246	64.322	0.004639	165.829	0.0043962	165.829	0.00575683	165.829	0.00433933	165.829	0.00409883	165.829	0.00319467
2.513	0.0036102	2.513	0.00227459	2.513	0.00256764	2035.18	0.017262	68.342	0.00601285	22.613	0.0040264	95.477	0.0073924	241.206	0.0085866	68.342	0.004549	173.367	0.0044452	173.367	0.00576483	173.367	0.00415633	173.367	0.00440683	173.367	0.00321567
5.025	0.0084852	5.025	0.00588459	5.025	0.00513764	2110.55	0.016592	72.362	0.00615485	25.126	0.0041524	100.503	0.0069534	251.256	0.0091906	72.362	0.004312	180.905	0.0040242	180.905	0.00560983	180.905	0.00390433	180.905	0.00429883	180.905	0.00325267
7.538	0.0097802	7.538	0.00703459	7.538	0.00604764	2185.93	0.016668	76.382	0.00566185	27.638	0.0038804	105.528	0.0071984	261.307	0.0086616	76.382	0.004197	188.442	0.0037462	188.442	0.00547783	188.442	0.00388133	188.442	0.00397383	188.442	0.00285067
10.05	0.0097277	10.05	0.00689959	10.05	0.00516764	2261.31	0.015635	80.402	0.00594985	30.151	0.0038304	110.553	0.0064234	271.357	0.0088626	80.402	0.004212	195.98	0.0043482	195.98	0.00516283	195.98	0.00398033	195.98	0.00407483	195.98	0.00300467
12.563	0.0085877	12.563	0.00676959	12.563	0.00499764	2336.68	0.016486	84.422	0.00540685	32.663	0.0034604	115.578	0.0069604	281.407	0.0087026	84.422	0.00398	203.518	0.0037002	203.518	0.00525483	203.518	0.00343233	203.518	0.00405783	203.518	0.00285867
15.075	0.0079277	15.075	0.00564459	15.075	0.00383764	2412.06	0.015972	88.442	0.00458185	35.176	0.0030884	120.603	0.0069144	291.457	0.0081116	88.442	0.003729	211.055	0.0035902	211.055	0.00503683	211.055	0.00349033	211.055	0.00360383	211.055	0.00291267
17.588	0.0071502	17.588	0.00557459	17.588	0.00435764	2487.44	0.015128	92.462	0.00477385	37.688	0.0032674	125.628	0.0063164	301.508	0.0084156	92.462	0.003378	218.593	0.0035852	218.593	0.00503383	218.593	0.00373333	218.593	0.00387883	218.593	0.00282567
20.101	0.0064627	20.101	0.00528959	20.101	0.00398764	2562.81	0.014986	96.482	0.00491785	40.201	0.0031384	130.653	0.0060974	311.558	0.0077436	96.482	0.003795	226.131	0.0034542	226.131	0.00451983	226.131	0.00324333	226.131	0.00337583	226.131	0.00266867
22.613	0.0060377	22.613	0.00491459	22.613	0.00323764	2638.19	0.014198	100.503	0.00542385	42.714	0.0029414	135.678	0.0060574	321.608	0.0076396	100.503	0.003862	233.668	0.0036342	233.668	0.00424983	233.668	0.00345133	233.668	0.00367583	233.668	0.00266567
25.126	0.0057652	25.126	0.00477459	25.126	0.00269764	2713.57	0.014571	104.523	0.00467485	45.226	0.0026484	140.704	0.0059494	331.658	0.0080716	104.523	0.003618	241.206	0.0032042	241.206	0.00455283	241.206	0.00344733	241.206	0.00364083	241.206	0.00238567
27.638	0.0057102	27.638	0.00455459	27.638	0.00317764	2788.95	0.014629	108.543	0.00459785	47.739	0.0026234	145.729	0.0056034	341.709	0.0082086	108.543	0.003357	248.744	0.0033262	248.744	0.00419483	248.744	0.00321033	248.744	0.00309583	248.744	0.00275867
30.151	0.0058102	30.151	0.00514959	30.151	0.00268764	2864.32	0.014496	112.563	0.00426385	50.251	0.0025984	150.754	0.0055624	351.759	0.0075516	112.563	0.003134	256.281	0.0032862	256.281	0.00437983	256.281	0.00306133	256.281	0.00296583	256.281	0.00205667
32.663	0.0052377	32.663	0.00447459	32.663	0.00265764	2939.7	0.013995	116.583	0.00453285	52.764	0.0025064	155.779	0.0057494	361.809	0.0077626	116.583	0.002983	263.819	0.0033252	263.819	0.00425183	263.819	0.00296433	263.819	0.00319683	263.819	0.00237967
35.176	0.0049552	35.176	0.00407959	35.176	0.00251764	3015.07	0.014551	120.603	0.00430785	55.276	0.0025054	160.804	0.0053044	371.859	0.0072286	120.603	0.003076	271.357	0.0031052	271.357	0.00395283	271.357	0.00274433	271.357	0.00276583	271.357	0.00228167
37.688	0.0044677	37.688	0.00389959	37.688	0.00217764	3090.45	0.013201	124.623	0.00419385	57.789	0.0025014	165.829	0.0055774	381.91	0.0075536	124.623	0.002663	278.894	0.0031542	278.894	0.00422683	278.894	0.00284733	278.894	0.00278583	278.894	0.00244967
40.201	0.0046102	40.201	0.00441959	40.201	0.00267764	3165.83	0.012713	128.643	0.00388685	60.302	0.0022924	170.854	0.0055474	391.96	0.0070116	128.643	0.002794	286.432	0.0029672	286.432	0.00405983	286.432	0.00298633	286.432	0.00323783	286.432	0.00225767
42.714	0.0046952	42.714	0.00376959	42.714	0.00180764	3241.21	0.012463	132.663	0.00393185	62.814	0.0022744	175.879	0.0053904	402.01	0.0077136	132.663	0.002982	293.97	0.0029542	293.97	0.00360683	293.97	0.00302033	293.97	0.00288983	293.97	0.00232067
45.226	0.0044552	45.226	0.00356459	45.226	0.00241764	3316.58	0.012675	136.683	0.00393485	65.327	0.0021454	180.905	0.0054604	412.06	0.0069406	136.683	0.002669	301.508	0.0027312	301.508	0.00370283	301.508	0.00273633	301.508	0.00282183	301.508	0.00207167
47.739	0.0039327	47.739	0.00390459	47.739	0.00213764	3391.96	0.013445	140.704	0.00388785	67.839	0.0022484	185.93	0.0052594	422.111	0.0069256	140.704	0.002762	309.045	0.0028852	309.045	0.00363383	309.045	0.00254033	309.045	0.00271183	309.045	0.00217467
50.251	0.0037327	50.251	0.00270959	50.251	0.00209764	3467.34	0.012479	144.724	0.00356685	70.352	0.0021064	190.955	0.0051034	432.161	0.0073836	144.724	0.002875	316.583	0.0026792	316.583	0.00383383	316.583	0.00263133	316.583	0.00257883	316.583	0.00226167
52.764	0.0035777	52.764	0.00326459	52.764	0.00157764	3542.71	0.012074	148.744	0.00390385	72.864	0.0020664	195.98	0.0053864	442.211	0.0064356	148.744	0.002589	324.121	0.0026592	324.121	0.00378983	324.121	0.00268733	324.121	0.00226183	324.121	0.00219967
55.276	0.0037727	55.276	0.00310959	55.276	0.00145764	3618.09	0.011504	152.764	0.00359085	75.377	0.0018984	201.005	0.0050684	452.261	0.0067136	152.764	0.002738	331.658	0.0023982	331.658	0.00324183	331.658	0.00213333	331.658	0.00241983	331.658	0.00206567
57.789	0.0035452	57.789	0.00358459	57.789	0.00171764	3693.47	0.011853	156.784	0.00366785	77.889	0.0019644	206.03	0.0048964	462.312	0.0064256	156.784	0.002536	339.196	0.0024222	339.196	0.00377283	339.196	0.00234733	339.196	0.00263883	339.196	0.00188467
60.302	0.0035277	60.302	0.00325959	60.302	0.00176764	3768.84	0.011502	160.804	0.00346785	80.402	0.0019834	211.055	0.0045724	472.362	0.0063506	160.804	0.002273	346.734	0.0024672	346.734	0.00324183	346.734	0.00243733	346.734	0.00237483	346.734	0.00202667
62.814	0.0034277	62.814	0.00280959	62.814	0.00129764	3844.22	0.011662	164.824	0.00341385	82.915	0.0018684	216.08	0.0044294	482.412	0.0067136	164.824	0.002339	354.271	0.0025502	354.271	0.00332483	354.271	0.00216333	354.271	0.00234683	354.271	0.00205067
65.327	0.0033177	65.327	0.00303959	65.327	0.00174764	3919.6	0.011201	168.844	0.00356285	85.427	0.0017764	221.106	0.0043444	492.462	0.0063836	168.844	0.002482	361.809	0.0023912	361.809	0.00333983	361.809	0.00252333	361.809	0.00233683	361.809	0.00204267
67.839	0.0032127	67.839	0.00279459	67.839	0.00151764	3994.98	0.010995	172.864	0.00382485	87.94	0.0019664	226.131	0.0049884	502.513	0.0061666	172.864	0.002544	369.347	0.0025612	369.347	0.00314683	369.347	0.00239733	369.347	0.00247583	369.347	0.00177867
70.352	0.0031377	70.352	0.00280959	70.352	0.00144764	4070.35	0.010829	176.884	0.00337785	90.452	0.0020834	231.156	0.0042694	512.563	0.0060666	176.884	0.002013	376.884	0.0025362	376.884	0.00316783	376.884	0.00213633	376.884	0.00252583	376.884	0.00191467
72.864	0.0031902	72.864	0.00252959	72.864	0.00149764	4145.73	0.011065	180.905	0.00348885	92.965	0.0016464	236.181	0.0047174	522.613	0.0057866	180.905	0.002206	384.422	0.0023562	384.422	0.00326583	384.422	0.00220033	384.422	0.00206983	384.422	0.00200467
75.377	0.0028502	75.377	0.00241459	75.377	0.00162764	4221.11	0.010336	184.925	0.00327685	95.477	0.0016024	241.206	0.0044734	532.663	0.0057346	184.925	0.002094	391.96	0.0022072	391.96	0.00287783	391.96	0.00205233	391.96	0.00226983	391.96	0.00175967
77.889	0.0030127	77.889	0.00252459	77.889	0.00136764	4296.48	0.010889	188.945	0.00294485	97.99	0.0014704	246.231	0.0046624	542.714	0.0062036	188.945	0.002174	399.497	0.0022022	399.497	0.00299583	399.497	0.00234333	399.497	0.00205483	399.497	0.00149767
80.402	0.0028702	80.402	0.00263959	80.402	0.00131764	4371.86	0.010934	192.965	0.00320485	100.503	0.0018024	251.256	0.0043934	552.764	0.0058006	192.965	0.001889	407.035	0.0022782	407.035	0.00265483	407.035	0.00229933	407.035	0.00226783	407.035	0.00206867
82.915	0.0030977	82.915	0.00262459	82.915	0.000977643	4447.24	0.009738	196.985	0.00280885	103.015	0.0017384	256.281	0.0040254	562.814	0.0056216	196.985	0.002023	414.573	0.0021712	414.573	0.00288483	414.573	0.00207733	414.573	0.00201483	414.573	0.00185767
85.427	0.0027002	85.427	0.00248459	85.427	0.00107764	4522.61	0.010182	201.005	0.00294485	105.528	0.0014784	261.307	0.0042204	572.864	0.0056356	201.005	0.001982	422.111	0.0020222	422.111	0.00289383	422.111	0.00173733	422.111	0.00220083	422.111	0.00174667
87.94	0.0026452	87.94	0.00267459	87.94	0.00125764	4597.99	0.010241	205.025	0.00328085	108.04	0.0015974	266.332	0.0042054	582.915	0.0057396	205.025	0.001935	429.648	0.0021572	429.648	0.00267583	429.648	0.00203333	429.648	0.00208183	429.648	0.00168167
90.452	0.0026652	90.452	0.00234459	90.452	0.000937643	4673.37	0.009855	209.045	0.00301985	110.553	0.0015484	271.357	0.0040374	592.965	0.0056546	209.045	0.002123	437.186	0.0020442	437.186	0.00270883	437.186	0.00212933	437.186	0.00197183	437.186	0.00168767
92.965	0.0024327	92.965	0.00221459	92.965	0.000957643	4748.74	0.009915	213.065	0.00296485	113.065	0.0014164	276.382	0.0040984	603.015	0.0055886	213.065	0.002017	444.724	0.0021052	444.724	0.00251283	444.724	0.00204433	444.724	0.00192083	444.724	0.00159067
95.477	0.0025077	95.477	0.00222959	95.477	0.00116764	4824.12	0.00977	217.085	0.00308185	115.578	0.0013514	281.407	0.0038724	613.065	0.0054996	217.085	0.002036	452.261	0.0020722	452.261	0.00273883	452.261	0.00172933	452.261	0.00187083	452.261	0.00145467
97.99	0.0024927	97.99	0.00203959	97.99	0.000677643	4899.5	0.00965	221.106	0.00309985	118.09	0.0014924	286.432	0.0040434	623.116	0.0053796	221.106	0.001954	459.799	0.0021252	459.799	0.00244983	459.799	0.00185633	459.799	0.00200983	459.799	0.00173767
100.503	0.0024477	100.503	0.00203459	100.503	0.00105764	4974.87	0.009445	225.126	0.00278185	120.603	0.0015714	291.457	0.0044804	633.166	0.0046836	225.126	0.001983	467.337	0.0019122	467.337	0.00292983	467.337	0.00186633	467.337	0.00198183	467.337	0.00161767
103.015	0.0023127	103.015	0.00234959	103.015	0.000787643	5050.25	0.008601	229.146	0.00266985	123.116	0.0013704	296.482	0.0039274	643.216	0.0052566	229.146	0.001524	474.874	0.0020682	474.874	0.00264683	474.874	0.00199333	474.874	0.00188883	474.874	0.00144767
105.528	0.0024002	105.528	0.00216959	105.528	0.00100764	5125.63	0.009102	233.166	0.00272185	125.628	0.0014134	301.508	0.0035254	653.266	0.0050786	233.166	0.002023	482.412	0.0017662	482.412	0.00266183	482.412	0.00191733	482.412	0.00207383	482.412	0.00169167
108.04	0.0022802	108.04	0.00203959	108.04	0.00102764	5201	0.00894	237.186	0.00286785	128.141	0.0013284	306.533	0.0038164	663.317	0.0052116	237.186	0.001835	489.95	0.0019212	489.95	0.00247683	489.95	0.00179733	489.95	0.00172583	489.95	0.00167967
110.553	0.0021052	110.553	0.00200959	110.553	0.00100764	5276.38	0.008828	241.206	0.00287985	130.653	0.0014354	311.558	0.0038934	673.367	0.0050166	241.206	0.001704	497.487	0.0016682	497.487	0.00242483	497.487	0.00169333	497.487	0.00174083	497.487	0.00158567
113.065	0.0022827	113.065	0.00204459	113.065	0.000897643	5351.76	0.008461	245.226	0.00259985	133.166	0.0012404	316.583	0.0037044	683.417	0.0045996	245.226	0.001575	505.025	0.0017492	505.025	0.00240783	505.025	0.00167533	505.025	0.00166483	505.025	0.00148767
115.578	0.0020152	115.578	0.00203459	115.578	0.000847643	5427.14	0.009108	249.246	0.00293685	135.678	0.0013564	321.608	0.0034834	693.467	0.0048436	249.246	0.001759	512.563	0.0019282	512.563	0.00255583	512.563	0.00169633	512.563	0.00185983	512.563	0.00157567
118.09	0.0020402	118.09	0.00211459	118.09	0.000717643	5502.51	0.009355	253.266	0.00275785	138.191	0.0011134	326.633	0.0037334	703.518	0.0047116	253.266	0.001545	520.101	0.0016822	520.101	0.00246583	520.101	0.00178933	520.101	0.00157383	520.101	0.00140767
120.603	0.0021152	120.603	0.00211959	120.603	0.000527643	5577.89	0.008404	257.286	0.00249885	140.704	0.0012454	331.658	0.0035434	713.568	0.0045916	257.286	0.001664	527.638	0.0017142	527.638	0.00209483	527.638	0.00162333	527.638	0.00168683	527.638	0.00150267
123.116	0.0020302	123.116	0.00171459	123.116	0.000617643	5653.27	0.008233	261.307	0.00252185	143.216	0.0011704	336.683	0.0033664	723.618	0.0047596	261.307	0.00159	535.176	0.0017752	535.176	0.00225783	535.176	0.00163933	535.176	0.00156783	535.176	0.00149567
125.628	0.0020852	125.628	0.00160459	125.628	0.000777643	5728.64	0.008495	265.327	0.00221485	145.729	0.0013374	341.709	0.0034164	733.668	0.0045856	265.327	0.001719	542.714	0.0017272	542.714	0.00262983	542.714	0.00177333	542.714	0.00160583	542.714	0.00140667
128.141	0.0017477	128.141	0.00172959	128.141	0.000474643	5804.02	0.008375	269.347	0.00250885	148.241	0.0012124	346.734	0.0032374	743.719	0.0043286	269.347	0.001783	550.251	0.0018042	550.251	0.00236183	550.251	0.00181433	550.251	0.00163683	550.251	0.00132067
130.653	0.0020052	130.653	0.00189459	130.653	0.000927643	5879.4	0.007949	273.367	0.00239385	150.754	0.0010214	351.759	0.0037874	753.769	0.0046836	273.367	0.001555	557.789	0.0017112	557.789	0.00228583	557.789	0.00163133	557.789	0.00168583	557.789	0.00143567
133.166	0.0019277	133.166	0.00182959	133.166	0.000767643	5954.77	0.007816	277.387	0.00274185	153.266	0.0011924	356.784	0.0032434	763.819	0.0043546	277.387	0.001634	565.327	0.0018942	565.327	0.00202783	565.327	0.00152433	565.327	0.00143383	565.327	0.00125867
135.678	0.0018052	135.678	0.00181959	135.678	0.000767643	6030.15	0.007849	281.407	0.00241185	155.779	0.0010774	361.809	0.0036794	773.869	0.0043156	281.407	0.001535	572.864	0.0015462	572.864	0.00240883	572.864	0.00126733	572.864	0.00148483	572.864	0.00128167
138.191	0.0015802	138.191	0.00214959	138.191	0.000647643	6105.53	0.008063	285.427	0.00224185	158.291	0.0009674	366.834	0.0032844	783.92	0.0040516	285.427	0.001436	580.402	0.0017712	580.402	0.00216783	580.402	0.00155133	580.402	0.00156983	580.402	0.00140567
140.704	0.0015002	140.704	0.00174459	140.704	0.000677643	6180.9	0.007184	289.447	0.00231185	160.804	0.0011004	371.859	0.0033784	793.97	0.0041406	289.447	0.001334	587.94	0.0015092	587.94	0.00215783	587.94	0.00143433	587.94	0.00148483	587.94	0.00131867
143.216	0.0017277	143.216	0.00171459	143.216	0.000537643	6256.28	0.007552	293.467	0.00255185	163.317	0.0011234	376.884	0.0032624	804.02	0.0041056	293.467	0.001456	595.477	0.0016372	595.477	0.00197883	595.477	0.00138233	595.477	0.00136683	595.477	0.00145267
145.729	0.0016802	145.729	0.00145459	145.729	0.000627643	6331.66	0.007514	297.487	0.00226085	165.829	0.0009544	381.91	0.0034774	814.07	0.0044426	297.487	0.001419	603.015	0.0015892	603.015	0.00214383	603.015	0.00156333	603.015	0.00129083	603.015	0.00115967
148.241	0.0015002	148.241	0.00156459	148.241	0.000514643	6407.04	0.007386	301.508	0.00239285	168.342	0.0009034	386.935	0.0031904	824.121	0.0040356	301.508	0.001505	610.553	0.0014952	610.553	0.00201183	610.553	0.00140233	610.553	0.00130383	610.553	0.00132167
150.754	0.0017977	150.754	0.00158459	150.754	0.000417643	6482.41	0.007354	305.528	0.00208785	170.854	0.0010074	391.96	0.0034424	834.171	0.0042186	305.528	0.001373	618.09	0.0014612	618.09	0.00192683	618.09	0.00145633	618.09	0.00147483	618.09	0.000961667
153.266	0.0014577	153.266	0.00170459	153.266	0.000404643	6557.79	0.006979	309.548	0.00257885	173.367	0.0009614	396.985	0.0033104	844.221	0.0043166	309.548	0.00129	625.628	0.0016242	625.628	0.00221983	625.628	0.00119433	625.628	0.00156983	625.628	0.00136667
155.779	0.0015602	155.779	0.00151959	155.779	0.000527643	6633.17	0.0071	313.568	0.00249285	175.879	0.0008874	402.01	0.0030704	854.271	0.0042036	313.568	0.001372	633.166	0.0013402	633.166	0.00197983	633.166	0.00143133	633.166	0.00129583	633.166	0.00119967
158.291	0.0013827	158.291	0.00165459	158.291	0.000567643	6708.54	0.006913	317.588	0.00227885	178.392	0.0008954	407.035	0.0030634	864.322	0.0039086	317.588	0.001293	640.704	0.0015112	640.704	0.00200983	640.704	0.00136333	640.704	0.00140683	640.704	0.00132567
160.804	0.0016977	160.804	0.00164959	160.804	0.000460643	6783.92	0.006922	321.608	0.00221285	180.905	0.0008854	412.06	0.0028634	874.372	0.0039136	321.608	0.001248	648.241	0.0012622	648.241	0.00190683	648.241	0.00152333	648.241	0.00147683	648.241	0.00116467
163.317	0.0015852	163.317	0.00135459	163.317	0.000500643	6859.3	0.007338	325.628	0.00242485	183.417	0.0009774	417.085	0.0031744	884.422	0.0041106	325.628	0.001249	655.779	0.0013482	655.779	0.00210383	655.779	0.00154733	655.779	0.00155783	655.779	0.00122067
165.829	0.0014052	165.829	0.00147459	165.829	0.000490643	6934.67	0.006804	329.648	0.00219085	185.93	0.0010654	422.111	0.0029194	894.472	0.0041166	329.648	0.001206	663.317	0.0014112	663.317	0.00190583	663.317	0.00125133	663.317	0.00115683	663.317	0.00110967
168.342	0.0012402	168.342	0.00148959	168.342	0.000647643	7010.05	0.006118	333.668	0.00207085	188.442	0.0007704	427.136	0.0030124	904.523	0.0037846	333.668	0.001214	670.854	0.0012642	670.854	0.00179483	670.854	0.00121733	670.854	0.00116483	670.854	0.000934667
170.854	0.0014202	170.854	0.00127459	170.854	0.000687643	7085.43	0.00606	337.688	0.00197485	190.955	0.0011734	432.161	0.0030494	914.573	0.0037836	337.688	0.001082	678.392	0.0013422	678.392	0.00189983	678.392	0.00140033	678.392	0.00134783	678.392	0.00118467
173.367	0.0012752	173.367	0.00142459	173.367	0.000537643	7160.8	0.006433	341.709	0.00236485	193.467	0.0008834	437.186	0.0026954	924.623	0.0035766	341.709	0.001213	685.93	0.0012502	685.93	0.00169583	685.93	0.00111533	685.93	0.00137783	685.93	0.00121567
175.879	0.0013977	175.879	0.00130459	175.879	0.000444643	7236.18	0.006222	345.729	0.00211485	195.98	0.0009144	442.211	0.0028084	934.673	0.0035256	345.729	0.001185	693.467	0.0013622	693.467	0.00188883	693.467	0.00126633	693.467	0.00124383	693.467	0.00111767
178.392	0.0013177	178.392	0.00149459	178.392	0.000497643	7311.56	0.006703	349.749	0.00198185	198.492	0.0007204	447.236	0.0027674	944.724	0.0036566	349.749	0.00119	701.005	0.0015392	701.005	0.00164683	701.005	0.00110333	701.005	0.00120983	701.005	0.00119867
180.905	0.0011652	180.905	0.00147959	180.905	0.000347643	7386.94	0.006366	353.769	0.00191485	201.005	0.0008604	452.261	0.0027434	954.774	0.0034956	353.769	0.001233	708.543	0.0013252	708.543	0.00160283	708.543	0.00113433	708.543	0.00114483	708.543	0.00108067
183.417	0.0012377	183.417	0.00146959	183.417	0.000474643	7462.31	0.006409	357.789	0.00187385	203.518	0.0007874	457.286	0.0029444	964.824	0.0034896	357.789	0.001158	716.08	0.0012062	716.08	0.00176583	716.08	0.00115433	716.08	0.00130083	716.08	0.00116267
185.93	0.0012202	185.93	0.00123959	185.93	0.000354643	7537.69	0.006506	361.809	0.00204185	206.03	0.0008434	462.312	0.0026504	974.874	0.0032656	361.809	0.00122	723.618	0.0012182	723.618	0.00151983	723.618	0.00111233	723.618	0.00125083	723.618	0.000852667
188.442	0.0012077	188.442	0.00122959	188.442	0.000387643	7613.06	0.006084	365.829	0.00194985	208.543	0.0007254	467.337	0.0028724	984.925	0.0033106	365.829	0.001206	731.156	0.0013582	731.156	0.00180883	731.156	0.00124033	731.156	0.00115083	731.156	0.00104667
190.955	0.0011252	190.955	0.00139959	190.955	0.000430643	7688.44	0.006155	369.849	0.00182285	211.055	0.0007904	472.362	0.0027824	994.975	0.0032566	369.849	0.001107	738.693	0.0012572	738.693	0.00147183	738.693	0.00127633	738.693	0.00123983	738.693	0.000990667
193.467	0.0011102	193.467	0.00114959	193.467	0.000414643	7763.82	0.005956	373.869	0.00197785	213.568	0.0007874	477.387	0.0025984	1005.03	0.0033456	373.869	0.000974	746.231	0.0012082	746.231	0.00182383	746.231	0.00104633	746.231	0.00125783	746.231	0.000954667
195.98	0.0011627	195.98	0.00138959	195.98	0.000257643	7839.2	0.006189	377.889	0.00184785	216.08	0.0007674	482.412	0.0026944	1015.08	0.0033066	377.889	0.000997	753.769	0.0011322	753.769	0.00158383	753.769	0.000850333	753.769	0.00106183	753.769	0.00102067
198.492	0.000997696	198.492	0.00142959	198.492	0.000340643	7914.57	0.00613	381.91	0.00186985	218.593	0.0008044	487.437	0.0026184	1025.13	0.0034106	381.91	0.001045	761.307	0.0012352	761.307	0.00155783	761.307	0.00104933	761.307	0.00115383	761.307	0.00104567
201.005	0.0010777	201.005	0.00123959	201.005	0.000637643	7989.95	0.006063	385.93	0.00206985	221.106	0.0008504	492.462	0.0027594	1035.18	0.0032906	385.93	0.001016	768.844	0.0012722	768.844	0.00194983	768.844	0.00108233	768.844	0.00119583	768.844	0.00106467
203.518	0.000995196	203.518	0.00140959	203.518	0.000270643	8065.33	0.005692	389.95	0.00185085	223.618	0.0007584	497.487	0.0027294	1045.23	0.0033896	389.95	0.001007	776.382	0.0010722	776.382	0.00171783	776.382	0.00101633	776.382	0.000958833	776.382	0.00108067
206.03	0.0010627	206.03	0.00150459	206.03	0.000274643	8140.7	0.005766	393.97	0.00170085	226.131	0.0006944	502.513	0.0026294	1055.28	0.0032666	393.97	0.00096	783.92	0.0010472	783.92	0.00155583	783.92	0.00108733	783.92	0.00100683	783.92	0.000942667
208.543	0.0010052	208.543	0.00123959	208.543	0.000387643	8216.08	0.006282	397.99	0.00171285	228.643	0.0007534	507.538	0.0028034	1065.33	0.0032106	397.99	0.0011	791.457	0.0012602	791.457	0.00141483	791.457	0.00107333	791.457	0.00121583	791.457	0.000987667
211.055	0.0012227	211.055	0.00130459	211.055	0.000350643	8291.46	0.00578	402.01	0.00183185	231.156	0.0007434	512.563	0.0023664	1075.38	0.0029096	402.01	0.001056	798.995	0.0010172	798.995	0.00144683	798.995	0.000992333	798.995	0.00102783	798.995	0.000964667
213.568	0.0010502	213.568	0.00126959	213.568	0.000137643	8366.83	0.005353	406.03	0.00199685	233.668	0.0007124	517.588	0.0026444	1085.43	0.0028236	406.03	0.000906	806.533	0.0010282	806.533	0.00148683	806.533	0.00106133	806.533	0.00112683	806.533	0.00106867
216.08	0.000920196	216.08	0.00118959	216.08	0.000234643	8442.21	0.005801	410.05	0.00182685	236.181	0.0006784	522.613	0.0025354	1095.48	0.0028826	410.05	0.001153	814.07	0.0009672	814.07	0.00148683	814.07	0.000929333	814.07	0.000996833	814.07	0.00103167
218.593	0.000930196	218.593	0.00105459	218.593	0.000114643	8517.59	0.005251	414.07	0.00171785	238.693	0.0005884	527.638	0.0027744	1105.53	0.0030526	414.07	0.000964	821.608	0.0011822	821.608	0.00134483	821.608	0.000930333	821.608	0.000960833	821.608	0.000962667
221.106	0.0011077	221.106	0.00110959	221.106	0.000447643	8592.96	0.005119	418.09	0.00193985	241.206	0.0006114	532.663	0.0026124	1115.58	0.0030206	418.09	0.000973	829.146	0.0011262	829.146	0.00148883	829.146	0.000936333	829.146	0.00112583	829.146	0.00108267
223.618	0.000877696	223.618	0.00119459	223.618	0.000147643	8668.34	0.00576	422.111	0.00178085	243.719	0.0006624	537.688	0.0022174	1125.63	0.0027566	422.111	0.000934	836.683	0.0010662	836.683	0.00149183	836.683	0.000866333	836.683	0.00108783	836.683	0.000867667
226.131	0.0010677	226.131	0.00116459	226.131	0.000204643	8743.72	0.005888	426.131	0.00201685	246.231	0.0006904	542.714	0.0026304	1135.68	0.0031116	426.131	0.000952	844.221	0.0011642	844.221	0.00140183	844.221	0.000983333	844.221	0.000950833	844.221	0.000860667
228.643	0.000970196	228.643	0.00101959	228.643	0.000404643	8819.09	0.005446	430.151	0.00182285	248.744	0.0006004	547.739	0.0022894	1145.73	0.0026216	430.151	0.00098	851.759	0.0009712	851.759	0.00141583	851.759	0.000847333	851.759	0.000864833	851.759	0.000831667
231.156	0.0010377	231.156	0.00100959	231.156	0.000337643	8894.47	0.005339	434.171	0.00165385	251.256	0.0005204	552.764	0.0023844	1155.78	0.0029286	434.171	0.001026	859.296	0.0011262	859.296	0.00145683	859.296	0.000920333	859.296	0.000921833	859.296	0.000734667
233.668	0.000942696	233.668	0.00127959	233.668	0.000244643	8969.85	0.005386	438.191	0.00150685	253.769	0.0006234	557.789	0.0026264	1165.83	0.0029536	438.191	0.000984	866.834	0.0009312	866.834	0.00160883	866.834	0.000905333	866.834	0.000963833	866.834	0.000865667
236.181	0.000885196	236.181	0.000819589	236.181	0.000230643	9045.23	0.004915	442.211	0.00174885	256.281	0.0005774	562.814	0.0024704	1175.88	0.0027996	442.211	0.000894	874.372	0.0008952	874.372	0.00129883	874.372	0.000811333	874.372	0.000854833	874.372	0.000841667
238.693	0.000865196	238.693	0.00117459	238.693	0.000334643	9120.6	0.005314	446.231	0.00164785	258.794	0.0005714	567.839	0.0023094	1185.93	0.0025296	446.231	0.00092	881.91	0.0009852	881.91	0.00142583	881.91	0.000886333	881.91	0.000707833	881.91	0.000841667
241.206	0.000862696	241.206	0.00100959	241.206	0.000350643	9195.98	0.005144	450.251	0.00152785	261.307	0.0006064	572.864	0.0022664	1195.98	0.0029696	450.251	0.000692	889.447	0.0010212	889.447	0.00141883	889.447	0.000789333	889.447	0.00104983	889.447	0.000812667
243.719	0.000825196	243.719	0.000839589	243.719	0.000324643	9271.36	0.00473	454.271	0.00171285	263.819	0.0005204	577.889	0.0023184	1206.03	0.0028316	454.271	0.000918	896.985	0.0010522	896.985	0.00133383	896.985	0.000857333	896.985	0.00105583	896.985	0.000905667
246.231	0.000677696	246.231	0.00110959	246.231	0.000257643	9346.73	0.005161	458.291	0.00159785	266.332	0.0006454	582.915	0.0022474	1216.08	0.0027166	458.291	0.000718	904.523	0.0010382	904.523	0.00123883	904.523	0.000635333	904.523	0.000827833	904.523	0.000948667
248.744	0.000877696	248.744	0.00108459	248.744	0.000347643	9422.11	0.00513	462.312	0.00161085	268.844	0.0005134	587.94	0.0023754	1226.13	0.0028736	462.312	0.000823	912.06	0.0009142	912.06	0.00132183	912.06	0.000764333	912.06	0.000974833	912.06	0.000806667
251.256	0.000645196	251.256	0.000879589	251.256	0.000177643	9497.49	0.004589	466.332	0.00149785	271.357	0.0006154	592.965	0.0022624	1236.18	0.0027656	466.332	0.000877	919.598	0.0008352	919.598	0.00120283	919.598	0.000831333	919.598	0.000800833	919.598	0.000919667
253.769	0.000775196	253.769	0.000899589	253.769	0.000334643	9572.86	0.004984	470.352	0.00142785	273.869	0.0006184	597.99	0.0021944	1246.23	0.0024456	470.352	0.000754	927.136	0.0009542	927.136	0.00130783	927.136	0.000659333	927.136	0.000757833	927.136	0.000817667
256.281	0.000692696	256.281	0.000924589	256.281	0.000230643	9648.24	0.005285	474.372	0.00145885	276.382	0.0006604	603.015	0.0022874	1256.28	0.0029346	474.372	0.00086	934.673	0.0008602	934.673	0.00110583	934.673	0.000874333	934.673	0.000850833	934.673	0.000867667
258.794	0.000850196	258.794	0.000964589	258.794	0.000217643	9723.62	0.004681	478.392	0.00155885	278.894	0.0005704	608.04	0.0023924	1266.33	0.0025416	478.392	0.000779	942.211	0.0010012	942.211	0.00117883	942.211	0.000900333	942.211	0.000849833	942.211	0.000801667
261.307	0.000727696	261.307	0.00111459	261.307	0.000164643	9799	0.005036	482.412	0.00167085	281.407	0.0005914	613.065	0.0022704	1276.38	0.0025446	482.412	0.000774	949.749	0.0009492	949.749	0.00122183	949.749	0.000952333	949.749	0.000768833	949.749	0.000637667
263.819	0.000740196	263.819	0.000899589	263.819	0.000104643	9874.37	0.004432	486.432	0.00137985	283.92	0.0006344	618.09	0.0023274	1286.43	0.0027986	486.432	0.000782	957.286	0.0008312	957.286	0.00128383	957.286	0.000749333	957.286	0.000934833	957.286	0.000724667
266.332	0.000737696	266.332	0.00101959	266.332	0.000224643	9949.75	0.004319	490.452	0.00158185	286.432	0.0004904	623.116	0.0022964	1296.48	0.0026686	490.452	0.00071	964.824	0.0007412	964.824	0.00125883	964.824	0.000820333	964.824	0.000744833	964.824	0.000751667
268.844	0.000707696	268.844	0.000934589	268.844	0.000340643	10025.1	0.004451	494.472	0.00151985	288.945	0.0004354	628.141	0.0024284	1306.53	0.0025826	494.472	0.000802	972.362	0.0010302	972.362	0.00112483	972.362	0.000866333	972.362	0.000823833	972.362	0.000938667
271.357	0.000750196	271.357	0.000859589	271.357	0.000167643	10100.5	0.005169	498.492	0.00152885	291.457	0.0005004	633.166	0.0021584	1316.58	0.0024056	498.492	0.000704	979.899	0.0009762	979.899	0.00128383	979.899	0.000751333	979.899	0.000710833	979.899	0.000767667
273.869	0.000699446	273.869	0.000964589	273.869	0.000277643	10175.9	0.004234	502.513	0.00145085	293.97	0.0003654	638.191	0.0019774	1326.63	0.0025536	502.513	0.000703	987.437	0.0008142	987.437	0.00110983	987.437	0.000735333	987.437	0.000749833	987.437	0.000696667
276.382	0.000670196	276.382	0.000899589	276.382	0.000234643	10251.3	0.004344	506.533	0.00142985	296.482	0.0005104	643.216	0.0019974	1336.68	0.0025086	506.533	0.000834	994.975	0.0008182	994.975	0.00129483	994.975	0.000779333	994.975	0.000765833	994.975	0.000775667
278.894	0.000582696	278.894	0.000864589	278.894	0.000124643	10326.6	0.004438	510.553	0.00151785	298.995	0.0004664	648.241	0.0020654	1346.73	0.0026296	510.553	0.000672	1002.51	0.0008622	1002.51	0.00111383	1002.51	0.000613333	1002.51	0.000833833	1002.51	0.000771667
281.407	0.000697696	281.407	0.000794589	281.407	0.000324643	10402	0.004614	514.573	0.00137085	301.508	0.0006454	653.266	0.0020094	1356.78	0.0025756	514.573	0.000638	1010.05	0.0008472	1010.05	0.00103583	1010.05	0.000663333	1010.05	0.000729833	1010.05	0.000650667
283.92	0.000685196	283.92	0.000609589	283.92	0.000154643	10477.4	0.00447	518.593	0.00166085	304.02	0.0003884	658.291	0.0020434	1366.83	0.0022996	518.593	0.000699	1017.59	0.0008402	1017.59	0.00106483	1017.59	0.000747333	1017.59	0.000693833	1017.59	0.000691667
286.432	0.000657696	286.432	0.000964589	286.432	0.000147643	10552.8	0.004278	522.613	0.00155185	306.533	0.0005424	663.317	0.0019664	1376.88	0.0023166	522.613	0.000642	1025.13	0.0009322	1025.13	0.00102583	1025.13	0.000764333	1025.13	0.000741833	1025.13	0.000762667
288.945	0.000620196	288.945	0.000759589	288.945	0.000194643	10628.1	0.004231	526.633	0.00146385	309.045	0.0004364	668.342	0.0020884	1386.94	0.0022936	526.633	0.000725	1032.66	0.0009272	1032.66	0.00117483	1032.66	0.000685333	1032.66	0.000813833	1032.66	0.000755667
291.457	0.000607696	291.457	0.000899589	291.457	0.000174643	10703.5	0.004209	530.653	0.00155985	311.558	0.0004534	673.367	0.0019504	1396.98	0.0024736	530.653	0.000662	1040.2	0.0007602	1040.2	0.00108583	1040.2	0.000691333	1040.2	0.000804833	1040.2	0.000814667
293.97	0.000560196	293.97	0.000964589	293.97	0.000104643	10778.9	0.004399	534.673	0.00125785	314.07	0.0004474	678.392	0.0021404	1407.04	0.0023066	534.673	0.000663	1047.74	0.0008842	1047.74	0.00110783	1047.74	0.000661333	1047.74	0.000640833	1047.74	0.000760667
296.482	0.000650196	296.482	0.000939589	296.482	0.000217643	10854.3	0.003792	538.693	0.00146985	316.583	0.0004504	683.417	0.0021444	1417.08	0.0021806	538.693	0.00067	1055.28	0.0007392	1055.28	0.000976833	1055.28	0.000866333	1055.28	0.000808833	1055.28	0.000675667
298.995	0.000637696	298.995	0.000909589	298.995	0.000217643	10929.6	0.004266	542.714	0.00128885	319.095	0.0005484	688.442	0.0019754	1427.14	0.0024126	542.714	0.000644	1062.81	0.0005912	1062.81	0.00113483	1062.81	0.000783333	1062.81	0.000771833	1062.81	0.000708667
301.508	0.000602696	301.508	0.000719589	301.508	0.000167643	11005	0.004404	546.734	0.00129085	321.608	0.0004764	693.467	0.0020144	1437.19	0.0022426	546.734	0.000662	1070.35	0.0007502	1070.35	0.000909833	1070.35	0.000824333	1070.35	0.000750833	1070.35	0.000694667
304.02	0.000565196	304.02	0.000694589	304.02	6.06429e-05	11080.4	0.004084	550.754	0.00141685	324.121	0.0004684	698.492	0.0019074	1447.24	0.0020486	550.754	0.000649	1077.89	0.0006312	1077.89	0.00111683	1077.89	0.000621333	1077.89	0.000647833	1077.89	0.000669667
306.533	0.000563446	306.533	0.000844589	306.533	0.000234643	11155.8	0.00432	554.774	0.00131985	326.633	0.0004904	703.518	0.0020394	1457.29	0.0025046	554.774	0.000662	1085.43	0.0009042	1085.43	0.000869833	1085.43	0.000606333	1085.43	0.000769833	1085.43	0.000649667
309.045	0.000587696	309.045	0.000744589	309.045	0.000147643	11231.2	0.004229	558.794	0.00166785	329.146	0.0004874	708.543	0.0019504	1467.34	0.0023136	558.794	0.000744	1092.96	0.0007782	1092.96	0.00106183	1092.96	0.000667333	1092.96	0.000679833	1092.96	0.000624667
311.558	0.000420196	311.558	0.000719589	311.558	7.46429e-05	11306.5	0.00419	562.814	0.00131185	331.658	0.0004724	713.568	0.0016494	1477.39	0.0022226	562.814	0.000514	1100.5	0.0007392	1100.5	0.000822833	1100.5	0.000571333	1100.5	0.000647833	1100.5	0.000808667
314.07	0.000491946	314.07	0.000779589	314.07	0.000327643	11381.9	0.00417	566.834	0.00128785	334.171	0.0003404	718.593	0.0017274	1487.44	0.0022166	566.834	0.00055	1108.04	0.0006312	1108.04	0.00112183	1108.04	0.000754333	1108.04	0.000737833	1108.04	0.000675667
316.583	0.000560196	316.583	0.000919589	316.583	0.000124643	11457.3	0.003989	570.854	0.00128385	336.683	0.0003824	723.618	0.0020184	1497.49	0.0019596	570.854	0.00064	1115.58	0.0007152	1115.58	0.000886833	1115.58	0.000603333	1115.58	0.000741833	1115.58	0.000699667
319.095	0.000542696	319.095	0.000624589	319.095	-5.35714e-06	11532.7	0.00413	574.874	0.00128685	339.196	0.0004264	728.643	0.0019104	1507.54	0.0021586	574.874	0.000697	1123.12	0.0008862	1123.12	0.000869833	1123.12	0.000665333	1123.12	0.000705833	1123.12	0.000681667
321.608	0.000521946	321.608	0.000784589	321.608	0.000114643	11608	0.003771	578.894	0.00126685	341.709	0.0003964	733.668	0.0019254	1517.59	0.0020116	578.894	0.000632	1130.65	0.0006772	1130.65	0.00120183	1130.65	0.000584333	1130.65	0.000578833	1130.65	0.000612667
324.121	0.000497696	324.121	0.000709589	324.121	0.000120643	11683.4	0.003909	582.915	0.00122285	344.221	0.0003614	738.693	0.0019534	1527.64	0.0022966	582.915	0.000677	1138.19	0.0006712	1138.19	0.000859833	1138.19	0.000702333	1138.19	0.000695833	1138.19	0.000541667
326.633	0.000545196	326.633	0.000789589	326.633	0.000227643	11758.8	0.00401	586.935	0.00117485	346.734	0.0004384	743.719	0.0016484	1537.69	0.0019406	586.935	0.000574	1145.73	0.0007062	1145.73	0.000957833	1145.73	0.000542333	1145.73	0.000515833	1145.73	0.000692667
329.146	0.000511946	329.146	0.000534589	329.146	0.000154643	11834.2	0.003778	590.955	0.00123485	349.246	0.0005054	748.744	0.0017404	1547.74	0.0020716	590.955	0.000547	1153.27	0.0007202	1153.27	0.000822833	1153.27	0.000660333	1153.27	0.000671833	1153.27	0.000702667
331.658	0.000506946	331.658	0.000674589	331.658	4.76429e-05	11909.5	0.003956	594.975	0.00109785	351.759	0.0004244	753.769	0.0017944	1557.79	0.0019966	594.975	0.000504	1160.8	0.0005902	1160.8	0.000953833	1160.8	0.000644333	1160.8	0.000613833	1160.8	0.000640667
334.171	0.000482696	334.171	0.000619589	334.171	0.000114643	11984.9	0.00379	598.995	0.00130385	354.271	0.0003974	758.794	0.0019244	1567.84	0.0021186	598.995	0.000415	1168.34	0.0007102	1168.34	0.000891833	1168.34	0.000500333	1168.34	0.000610833	1168.34	0.000614667
336.683	0.000391196	336.683	0.000669589	336.683	0.000144643	12060.3	0.003811	603.015	0.00111985	356.784	0.0004824	763.819	0.0019824	1577.89	0.0020856	603.015	0.000549	1175.88	0.0006182	1175.88	0.00103983	1175.88	0.000410333	1175.88	0.000479833	1175.88	0.000695667
339.196	0.000462696	339.196	0.000654589	339.196	0.000207643	12135.7	0.003562	607.035	0.00118685	359.296	0.0004214	768.844	0.0017944	1587.94	0.0019326	607.035	0.000476	1183.42	0.0006452	1183.42	0.000772833	1183.42	0.000747333	1183.42	0.000691833	1183.42	0.000614667
341.709	0.000431946	341.709	0.000626089	341.709	0.000154643	12211.1	0.003942	611.055	0.00120085	361.809	0.0003014	773.869	0.0018094	1597.99	0.0020086	611.055	0.000592	1190.95	0.0007192	1190.95	0.000969833	1190.95	0.000580333	1190.95	0.000627833	1190.95	0.000520667
344.221	0.000391946	344.221	0.000644589	344.221	0.000110643	12286.4	0.003879	615.075	0.00116285	364.322	0.0003564	778.894	0.0017774	1608.04	0.0018286	615.075	0.000776	1198.49	0.0006692	1198.49	0.000811833	1198.49	0.000570333	1198.49	0.000564833	1198.49	0.000666667
346.734	0.000590196	346.734	0.000634589	346.734	0.000140643	12361.8	0.003765	619.095	0.00110885	366.834	0.0004554	783.92	0.0017524	1618.09	0.0018616	619.095	0.0006	1206.03	0.0005602	1206.03	0.000707833	1206.03	0.000583333	1206.03	0.000657833	1206.03	0.000605667
349.246	0.000324446	349.246	0.000649589	349.246	3.06429e-05	12437.2	0.003814	623.116	0.00114285	369.347	0.0003374	788.945	0.0017354	1628.14	0.0022106	623.116	0.000544	1213.57	0.0006922	1213.57	0.000803833	1213.57	0.000542333	1213.57	0.000578833	1213.57	0.000646667
351.759	0.000450196	351.759	0.000544589	351.759	0.000180643	12512.6	0.003522	627.136	0.00110485	371.859	0.0002644	793.97	0.0016234	1638.19	0.0019386	627.136	0.000468	1221.11	0.0007252	1221.11	0.000818833	1221.11	0.000471333	1221.11	0.000513833	1221.11	0.000674667
354.271	0.000327946	354.271	0.000601089	354.271	0.000167643	12587.9	0.003994	631.156	0.00123385	374.372	0.0004024	798.995	0.0017954	1648.24	0.0020706	631.156	0.00055	1228.64	0.0005892	1228.64	0.000903833	1228.64	0.000431333	1228.64	0.000630833	1228.64	0.000605667
356.784	0.000414446	356.784	0.000549589	356.784	0.000194643	12663.3	0.003642	635.176	0.00123485	376.884	0.0004474	804.02	0.0016664	1658.29	0.0017386	635.176	0.000546	1236.18	0.0006422	1236.18	0.000749833	1236.18	0.000615333	1236.18	0.000643833	1236.18	0.000717667
359.296	0.000475946	359.296	0.000584589	359.296	0.000127643	12738.7	0.003681	639.196	0.00105885	379.397	0.0003514	809.045	0.0016884	1668.34	0.0018046	639.196	0.000476	1243.72	0.0005902	1243.72	0.000799833	1243.72	0.000595333	1243.72	0.000591833	1243.72	0.000540667
361.809	0.000380196	361.809	0.000559589	361.809	0.000194643	12814.1	0.003592	643.216	0.000976846	381.91	0.0003964	814.07	0.0017324	1678.39	0.0016326	643.216	0.000526	1251.26	0.0006052	1251.26	0.000779833	1251.26	0.000536333	1251.26	0.000554833	1251.26	0.000626667
364.322	0.000365196	364.322	0.000639589	364.322	0.000210643	12889.4	0.003871	647.236	0.00114785	384.422	0.0002634	819.095	0.0016324	1688.44	0.0017166	647.236	0.000509	1258.79	0.0005842	1258.79	0.000807833	1258.79	0.000537333	1258.79	0.000560833	1258.79	0.000606667
366.834	0.000452696	366.834	0.000374589	366.834	0.000144643	12964.8	0.003664	651.256	0.00117685	386.935	0.0003084	824.121	0.0019354	1698.49	0.0018296	651.256	0.000554	1266.33	0.0005712	1266.33	0.000835833	1266.33	0.000510333	1266.33	0.000496833	1266.33	0.000496667
369.347	0.000283696	369.347	0.000684589	369.347	0.000117643	13040.2	0.003492	655.276	0.00104885	389.447	0.0003514	829.146	0.0017404	1708.54	0.0017866	655.276	0.000529	1273.87	0.0006082	1273.87	0.000776833	1273.87	0.000452333	1273.87	0.000540833	1273.87	0.000672667
371.859	0.000345196	371.859	0.000448089	371.859	0.000164643	13115.6	0.003191	659.296	0.00106185	391.96	0.0003424	834.171	0.0016964	1718.59	0.0018066	659.296	0.000505	1281.41	0.0005242	1281.41	0.000819833	1281.41	0.000523333	1281.41	0.000493833	1281.41	0.000594667
374.372	0.000334446	374.372	0.000489589	374.372	0.000120643	13191	0.003339	663.317	0.00114385	394.472	0.0003914	839.196	0.0019744	1728.64	0.0017786	663.317	0.000492	1288.94	0.0005642	1288.94	0.000849833	1288.94	0.000546333	1288.94	0.000624833	1288.94	0.000641667
376.884	0.000339446	376.884	0.000594589	376.884	0.000210643	13266.3	0.003442	667.337	0.00114085	396.985	0.0003284	844.221	0.0014444	1738.69	0.0016746	667.337	0.000468	1296.48	0.0005812	1296.48	0.000724833	1296.48	0.000512333	1296.48	0.000547833	1296.48	0.000547667
379.397	0.000323696	379.397	0.000571089	379.397	9.06429e-05	13341.7	0.003514	671.357	0.00100085	399.497	0.0003614	849.246	0.0015584	1748.74	0.0016556	671.357	0.00064	1304.02	0.0004742	1304.02	0.000794833	1304.02	0.000454333	1304.02	0.000561833	1304.02	0.000482667
381.91	0.000305946	381.91	0.000578089	381.91	0.000157643	13417.1	0.003474	675.377	0.00109185	402.01	0.0002684	854.271	0.0014974	1758.79	0.0017556	675.377	0.000483	1311.56	0.0004662	1311.56	0.000831833	1311.56	0.000477333	1311.56	0.000528833	1311.56	0.000569667
384.422	0.000351946	384.422	0.000463089	384.422	5.06429e-05	13492.5	0.003438	679.397	0.00103185	404.523	0.0002284	859.296	0.0015694	1768.84	0.0016016	679.397	0.000523	1319.09	0.0005562	1319.09	0.000724833	1319.09	0.000535333	1319.09	0.000554833	1319.09	0.000494667
386.935	0.000361946	386.935	0.000624589	386.935	7.06429e-05	13567.8	0.003243	683.417	0.000996846	407.035	0.0002914	864.322	0.0016804	1778.89	0.0016936	683.417	0.000454	1326.63	0.0004582	1326.63	0.000831833	1326.63	0.000430333	1326.63	0.000436833	1326.63	0.000599667
389.447	0.000384446	389.447	0.000564589	389.447	0.000104643	13643.2	0.003364	687.437	0.00117185	409.548	0.0003624	869.347	0.0016394	1788.94	0.0017126	687.437	0.00049	1334.17	0.0005652	1334.17	0.000731833	1334.17	0.000537333	1334.17	0.000527833	1334.17	0.000565667
391.96	0.000328196	391.96	0.000609589	391.96	2.76429e-05	13718.6	0.003173	691.457	0.000942846	412.06	0.0002934	874.372	0.0015474	1798.99	0.0015626	691.457	0.00052	1341.71	0.0005972	1341.71	0.000687833	1341.71	0.000481333	1341.71	0.000449833	1341.71	0.000550667
394.472	0.000303696	394.472	0.000371089	394.472	0.000174643	13794	0.003433	695.477	0.00107085	414.573	0.0003314	879.397	0.0014974	1809.05	0.0016886	695.477	0.000558	1349.25	0.0006072	1349.25	0.000722833	1349.25	0.000467333	1349.25	0.000476833	1349.25	0.000447667
396.985	0.000403446	396.985	0.000536089	396.985	-1.23571e-05	13869.3	0.003259	699.497	0.000811846	417.085	0.0002644	884.422	0.0015664	1819.09	0.0019836	699.497	0.000493	1356.78	0.0005662	1356.78	0.000897833	1356.78	0.000536333	1356.78	0.000440833	1356.78	0.000437667
399.497	0.000348446	399.497	0.000443089	399.497	6.76429e-05	13944.7	0.003333	703.518	0.000992846	419.598	0.0002504	889.447	0.0016794	1829.15	0.0018186	703.518	0.000478	1364.32	0.0005422	1364.32	0.000709833	1364.32	0.000405333	1364.32	0.000517833	1364.32	0.000586667
402.01	0.000270196	402.01	0.000554589	402.01	0.000120643	14020.1	0.003285	707.538	0.00114685	422.111	0.0003204	894.472	0.0014804	1839.2	0.0019006	707.538	0.000504	1371.86	0.0006202	1371.86	0.000587833	1371.86	0.000353333	1371.86	0.000440833	1371.86	0.000540667
404.523	0.000293446	404.523	0.000594589	404.523	0.000144643	14095.5	0.003033	711.558	0.00102185	424.623	0.0002964	899.497	0.0014484	1849.25	0.0016746	711.558	0.000433	1379.4	0.0005762	1379.4	0.000686833	1379.4	0.000502333	1379.4	0.000471833	1379.4	0.000464667
407.035	0.000357696	407.035	0.000501089	407.035	0.000134643	14170.9	0.003636	715.578	0.000966846	427.136	0.0002334	904.523	0.0014784	1859.3	0.0014266	715.578	0.000372	1386.94	0.0005452	1386.94	0.000661833	1386.94	0.000426333	1386.94	0.000398833	1386.94	0.000496667
409.548	0.000369446	409.548	0.000438089	409.548	5.06429e-05	14246.2	0.003145	719.598	0.000908846	429.648	0.0003544	909.548	0.0015044	1869.35	0.0017166	719.598	0.000525	1394.47	0.0004552	1394.47	0.000593833	1394.47	0.000383333	1394.47	0.000503833	1394.47	0.000457667
412.06	0.000355446	412.06	0.000376089	412.06	0.000160643	14321.6	0.002788	723.618	0.00124885	432.161	0.0002714	914.573	0.0015344	1879.4	0.0015486	723.618	0.000402	1402.01	0.0006502	1402.01	0.000644833	1402.01	0.000469333	1402.01	0.000511833	1402.01	0.000452667
414.573	0.000271946	414.573	0.000469589	414.573	0.000194643	14397	0.003103	727.638	0.00105885	434.673	0.0003484	919.598	0.0015924	1889.45	0.0015226	727.638	0.000452	1409.55	0.0006312	1409.55	0.000581833	1409.55	0.000362333	1409.55	0.000451833	1409.55	0.000502667
417.085	0.000244196	417.085	0.000518089	417.085	5.46429e-05	14472.4	0.002791	731.658	0.000944846	437.186	0.0003304	924.623	0.0014434	1899.5	0.0017236	731.658	0.000405	1417.08	0.0005322	1417.08	0.000688833	1417.08	0.000429333	1417.08	0.000401833	1417.08	0.000465667
419.598	0.000355946	419.598	0.000499589	419.598	0.000120643	14547.7	0.003225	735.678	0.000877846	439.698	0.0002904	929.648	0.0015194	1909.55	0.0015406	735.678	0.00043	1424.62	0.0005892	1424.62	0.000681833	1424.62	0.000445333	1424.62	0.000360833	1424.62	0.000455667
422.111	0.000281946	422.111	0.000539589	422.111	0.000174643	14623.1	0.003159	739.698	0.00112985	442.211	0.0003834	934.673	0.0015104	1919.6	0.0016436	739.698	0.000492	1432.16	0.0004842	1432.16	0.000716833	1432.16	0.000412333	1432.16	0.000405833	1432.16	0.000512667
424.623	0.000416696	424.623	0.000379589	424.623	0.000137643	14698.5	0.003259	743.719	0.000977846	444.724	0.0002854	939.698	0.0017074	1929.65	0.0014236	743.719	0.000464	1439.7	0.0004672	1439.7	0.000667833	1439.7	0.000377333	1439.7	0.000490833	1439.7	0.000480667
427.136	0.000276696	427.136	0.000519589	427.136	0.000157643	14773.9	0.003163	747.739	0.000978846	447.236	0.0002624	944.724	0.0015144	1939.7	0.0014996	747.739	0.000469	1447.24	0.0005282	1447.24	0.000695833	1447.24	0.000439333	1447.24	0.000403833	1447.24	0.000451667
429.648	0.000277946	429.648	0.000489589	429.648	8.06429e-05	14849.2	0.003252	751.759	0.00108785	449.749	0.0002724	949.749	0.0015724	1949.75	0.0013706	751.759	0.000383	1454.77	0.0005082	1454.77	0.000661833	1454.77	0.000382333	1454.77	0.000406833	1454.77	0.000475667

## Sheet: Dataset 2
HgBr 16092021 3	HgBr 16092021 3	HgBr 16092021 3	HgBr 16092021 3	HgBr 16092021 4	HgBr 16092021 4	HgBr 16092021 5	HgBr 16092021 5	HgBr 16092021 6	HgBr 16092021 6	HgBr 16092021 7	HgBr 16092021 7	HgBr 16092021 8	HgBr 16092021 8	HgBr 16092021 9	HgBr 16092021 9	HgBr 16092021 10	HgBr 16092021 10	HgBr 16092021 11	HgBr 16092021 11	HgBr 16092021 12	HgBr 16092021 12
[O3]0/molecule cm-3	0	[O3]0/molecule cm-3	533000000000000	[O3]0/molecule cm-3	284000000000000	[O3]0/molecule cm-3	115000000000000	[O3]0/molecule cm-3	303000000000000	[O3]0/molecule cm-3	438000000000000	[O3]0/molecule cm-3	252000000000000	[O3]0/molecule cm-3	78600000000000	[O3]0/molecule cm-3	51900000000000	[O3]0/molecule cm-3	127000000000000	[O3]0/molecule cm-3	560000000000000
pf	0	pf	0.49	pf	0.49	pf	0.49	pf	0.49	pf	0.49	pf	0.49	pf	0.49	pf	0.49	pf	0.49	pf	0.49
t/us	HgBr LIF Signal	t/us	HgBr LIF Signal	t/us	HgBr LIF Signal	t/us	HgBr LIF Signal	t/us	HgBr LIF Signal	t/us	HgBr LIF Signal	t/us	HgBr LIF Signal	t/us	HgBr LIF Signal	t/us	HgBr LIF Signal	t/us	HgBr LIF Signal	t/us	HgBr LIF Signal
-4500	-9.85556e-05	-100.03	-4.05e-05	-100.03	-5.19167e-05	-100.02	-0.000176111	-100.03	0.00016725	-100.03	2.15e-05	-100.035	-8.84444e-05	-99.99	6.75e-05	-99.99	-0.000140667	-99.99	8.65556e-05	-100.045	-2.26667e-05
-4000	-2.05556e-05	-92.885	7.05e-05	-92.885	4.08333e-06	-91.685	-4.31111e-05	-92.885	0.00030125	-92.885	3.25e-05	-92.34	-0.000188444	-90.9	3.45e-05	-90.9	0.000259333	-90.9	0.000175556	-94.16	-1.16667e-05
-3500	-7.65556e-05	-85.74	-4.05e-05	-85.74	-4.09167e-05	-83.35	-9.91111e-05	-85.74	4.525e-05	-85.74	5.45e-05	-84.645	-4.44444e-07	-81.81	0.0001675	-81.81	-4.06667e-05	-81.81	-4.64444e-05	-88.275	4.33333e-05
-3000	0.000234444	-78.595	-1.85e-05	-78.595	-0.000129917	-75.015	-9.91111e-05	-78.595	-0.00012175	-78.595	9.95e-05	-76.95	-2.24444e-05	-72.72	2.35e-05	-72.72	-9.66667e-05	-72.72	0.000108556	-82.39	-2.26667e-05
-2500	0.000112444	-71.45	-2.95e-05	-71.45	-7.39167e-05	-66.68	0.000134889	-71.45	1.225e-05	-71.45	-0.0001455	-69.255	0.000188556	-63.63	5.65e-05	-63.63	-0.000107667	-63.63	-8.04444e-05	-76.505	2.13333e-05
-2000	-3.25556e-05	-64.305	0.0001035	-64.305	-0.000151917	-58.345	4.58889e-05	-64.305	-4.375e-05	-64.305	-5e-07	-61.56	-4.44444e-07	-54.54	-0.0001655	-54.54	4.83333e-05	-54.54	0.000119556	-70.62	4.33333e-05
-1500	-5.45556e-05	-57.16	7.05e-05	-57.16	9.30833e-05	-50.01	0.000178889	-57.16	2.325e-05	-57.16	-1.25e-05	-53.865	-2.24444e-05	-45.45	4.55e-05	-45.45	1.53333e-05	-45.45	1.95556e-05	-64.735	-3.46667e-05
-1000	5.64444e-05	-50.015	-0.0002075	-50.015	-7.39167e-05	-41.675	-3.21111e-05	-50.015	5.625e-05	-50.015	-1.25e-05	-46.17	-7.74444e-05	-36.36	-4.35e-05	-36.36	8.13333e-05	-36.36	-0.000213444	-58.85	-0.000145667
-500	-0.000120556	-42.87	-7.45e-05	-42.87	0.000170083	-33.34	8.98889e-05	-42.87	-0.00036575	-42.87	-8.95e-05	-38.475	0.000211556	-27.27	1.15e-05	-27.27	-1.86667e-05	-27.27	-0.000169444	-52.965	1.03333e-05
0	-0.000309556	-35.725	-0.0001185	-35.725	7.00833e-05	-25.005	0.000112889	-35.725	-0.00010975	-35.725	-4.55e-05	-30.78	1.15556e-05	-18.18	5e-07	-18.18	-5.16667e-05	-18.18	0.000119556	-47.08	-6.76667e-05
251.256	0.22601	-28.58	0.0001145	-28.58	0.000148083	-16.67	2.38889e-05	-28.58	-0.00010975	-28.58	2.15e-05	-23.085	5.55556e-05	-9.09	-3.25e-05	-9.09	-6.26667e-05	-9.09	5.35556e-05	-41.195	0.000132333
502.513	0.32237	-21.435	0.0001705	-21.435	3.70833e-05	-8.335	1.28889e-05	-21.435	0.00014525	-21.435	7.65e-05	-15.39	-4.44444e-07	0	-0.0001655	0	0.08597	0	-0.000169444	-35.31	5.43333e-05
753.769	0.32398	-14.29	-0.0002295	-14.29	0.000393083	0	-0.000321111	-14.29	4.525e-05	-14.29	-0.0001345	-7.695	-2.24444e-05	10.05	0.079	20.101	0.11447	7.538	0.06452	-29.425	-0.000111667
1005.03	0.31182	-7.145	-7.5e-06	-7.145	5.90833e-05	6.03	0.09886	-7.145	0.00014525	-7.145	-8.95e-05	0	-0.000211444	20.101	0.1212	40.201	0.11032	15.075	0.09525	-23.54	-2.26667e-05
1256.28	0.30373	0	-2.95e-05	0	0.000204083	12.06	0.13923	0	0.00011225	0	-3.45e-05	5.025	0.0627	30.151	0.11627	60.302	0.10742	22.613	0.08631	-17.655	-8.96667e-05
1507.54	0.29672	4.02	0.06816	4.02	0.08227	18.09	0.13225	4.02	0.07641	4.02	0.0624	10.05	0.09624	40.201	0.10639	80.402	0.09932	30.151	0.08034	-11.77	1.03333e-05
1758.79	0.28832	8.04	0.08765	8.04	0.10973	24.121	0.12378	8.04	0.10933	8.04	0.08583	15.075	0.08857	50.251	0.10273	100.503	0.09652	37.688	0.07608	-5.885	-6.66667e-07
2010.05	0.27612	12.06	0.07886	12.06	0.10443	30.151	0.12193	12.06	0.0982	12.06	0.08002	20.101	0.07966	60.302	0.10128	120.603	0.08922	45.226	0.07098	0	-4.56667e-05
2261.31	0.27597	16.08	0.06839	16.08	0.10064	36.181	0.1174	16.08	0.0942	16.08	0.07508	25.126	0.07621	70.352	0.09978	140.704	0.08348	52.764	0.06742	2.513	0.04427
2512.56	0.2656	20.101	0.06047	20.101	0.09826	42.211	0.11449	20.101	0.08589	20.101	0.07023	30.151	0.06754	80.402	0.08649	160.804	0.08149	60.302	0.06456	5.025	0.06187
2763.82	0.26826	24.121	0.0557	24.121	0.08823	48.241	0.10857	24.121	0.07736	24.121	0.06044	35.176	0.06923	90.452	0.08449	180.905	0.07502	67.839	0.05884	7.538	0.05749
3015.07	0.25227	28.141	0.05233	28.141	0.0828	54.271	0.09753	28.141	0.07362	28.141	0.05888	40.201	0.06561	100.503	0.08449	201.005	0.07138	75.377	0.05886	10.05	0.05137
3266.33	0.23822	32.161	0.04693	32.161	0.07995	60.302	0.09875	32.161	0.07059	32.161	0.05399	45.226	0.06031	110.553	0.08035	221.106	0.06736	82.915	0.05429	12.563	0.04895
3517.59	0.24901	36.181	0.04465	36.181	0.07709	66.332	0.09663	36.181	0.06583	36.181	0.05081	50.251	0.05558	120.603	0.07735	241.206	0.06765	90.452	0.05194	15.075	0.04555
3768.84	0.23583	40.201	0.04153	40.201	0.06854	72.362	0.08903	40.201	0.06396	40.201	0.04625	55.276	0.05427	130.653	0.07491	261.307	0.06412	97.99	0.05151	17.588	0.04181
4020.1	0.23923	44.221	0.03791	44.221	0.07037	78.392	0.08683	44.221	0.06087	44.221	0.04571	60.302	0.05259	140.704	0.07087	281.407	0.06209	105.528	0.04924	20.101	0.03995
4271.36	0.23719	48.241	0.03735	48.241	0.06699	84.422	0.08532	48.241	0.058	48.241	0.04464	65.327	0.04801	150.754	0.06912	301.508	0.06012	113.065	0.04705	22.613	0.03818
4522.61	0.23122	52.261	0.03573	52.261	0.06428	90.452	0.07927	52.261	0.058	52.261	0.04221	70.352	0.04821	160.804	0.06759	321.608	0.05563	120.603	0.04445	25.126	0.03427
4773.87	0.22495	56.281	0.03318	56.281	0.06363	96.482	0.08106	56.281	0.05206	56.281	0.03847	75.377	0.04757	170.854	0.06503	341.709	0.05609	128.141	0.04269	27.638	0.03317
5025.13	0.21769	60.302	0.03136	60.302	0.05928	102.513	0.07887	60.302	0.05383	60.302	0.03719	80.402	0.04338	180.905	0.06532	361.809	0.05396	135.678	0.04259	30.151	0.03138
5276.38	0.21483	64.322	0.03035	64.322	0.05664	108.543	0.07382	64.322	0.04863	64.322	0.03755	85.427	0.0426	190.955	0.06091	381.91	0.05153	143.216	0.03866	32.663	0.02804
5527.64	0.20978	68.342	0.03016	68.342	0.05404	114.573	0.0747	68.342	0.04868	68.342	0.03388	90.452	0.04124	201.005	0.06117	402.01	0.04775	150.754	0.03768	35.176	0.02723
5778.89	0.2133	72.362	0.02844	72.362	0.052	120.603	0.06755	72.362	0.04763	72.362	0.03413	95.477	0.0391	211.055	0.06216	422.111	0.0478	158.291	0.0358	37.688	0.02717
6030.15	0.20436	76.382	0.02545	76.382	0.05304	126.633	0.0688	76.382	0.04553	76.382	0.03419	100.503	0.03517	221.106	0.05679	442.211	0.04719	165.829	0.0331	40.201	0.02518
6281.41	0.19756	80.402	0.02589	80.402	0.04994	132.663	0.06525	80.402	0.0415	80.402	0.03089	105.528	0.03614	231.156	0.05611	462.312	0.04667	173.367	0.03363	42.714	0.02444
6532.66	0.19109	84.422	0.02385	84.422	0.04625	138.693	0.0627	84.422	0.042	84.422	0.03133	110.553	0.03453	241.206	0.05288	482.412	0.04614	180.905	0.03382	45.226	0.02434
6783.92	0.19948	88.442	0.02467	88.442	0.04375	144.724	0.06276	88.442	0.04202	88.442	0.03051	115.578	0.03503	251.256	0.04931	502.513	0.04483	188.442	0.03341	47.739	0.02463
7035.18	0.19728	92.462	0.02496	92.462	0.04467	150.754	0.06302	92.462	0.03876	92.462	0.02977	120.603	0.03352	261.307	0.0537	522.613	0.04392	195.98	0.03316	50.251	0.02437
7286.43	0.18815	96.482	0.02174	96.482	0.04362	156.784	0.05361	96.482	0.03831	96.482	0.02899	125.628	0.03317	271.357	0.04889	542.714	0.04195	203.518	0.03102	52.764	0.02231
7537.69	0.18805	100.503	0.02226	100.503	0.04338	162.814	0.05975	100.503	0.0381	100.503	0.02663	130.653	0.03222	281.407	0.05238	562.814	0.04355	211.055	0.03026	55.276	0.02173
7788.94	0.17676	104.523	0.0214	104.523	0.04272	168.844	0.05766	104.523	0.03682	104.523	0.02627	135.678	0.03092	291.457	0.04987	582.915	0.03878	218.593	0.02906	57.789	0.02121
8040.2	0.17912	108.543	0.02006	108.543	0.0385	174.874	0.05798	108.543	0.03478	108.543	0.02623	140.704	0.03167	301.508	0.049	603.015	0.03886	226.131	0.02955	60.302	0.02154
8291.46	0.17741	112.563	0.01987	112.563	0.03962	180.905	0.05363	112.563	0.03236	112.563	0.02527	145.729	0.03026	311.558	0.0477	623.116	0.03519	233.668	0.02868	62.814	0.02098
8542.71	0.1746	116.583	0.01941	116.583	0.03939	186.935	0.05233	116.583	0.03399	116.583	0.02572	150.754	0.02976	321.608	0.04681	643.216	0.03507	241.206	0.02814	65.327	0.01883
8793.97	0.16591	120.603	0.01971	120.603	0.03935	192.965	0.05159	120.603	0.03309	120.603	0.02339	155.779	0.02944	331.658	0.04426	663.317	0.0371	248.744	0.02752	67.839	0.01892
9045.23	0.16215	124.623	0.01769	124.623	0.038	198.995	0.04946	124.623	0.03349	124.623	0.02349	160.804	0.0304	341.709	0.04356	683.417	0.03484	256.281	0.02649	70.352	0.01893
9296.48	0.16632	128.643	0.0179	128.643	0.03694	205.025	0.05046	128.643	0.03083	128.643	0.02361	165.829	0.02809	351.759	0.04338	703.518	0.03243	263.819	0.02614	72.864	0.01875
9547.74	0.16171	132.663	0.01648	132.663	0.03779	211.055	0.04841	132.663	0.03006	132.663	0.0237	170.854	0.02832	361.809	0.04366	723.618	0.03224	271.357	0.0267	75.377	0.01888
9799	0.15478	136.683	0.0159	136.683	0.03583	217.085	0.05077	136.683	0.03079	136.683	0.02101	175.879	0.02684	371.859	0.04046	743.719	0.03069	278.894	0.02524	77.889	0.01732
10050.3	0.1586	140.704	0.01624	140.704	0.03434	223.116	0.0494	140.704	0.02715	140.704	0.02098	180.905	0.02496	381.91	0.04208	763.819	0.03122	286.432	0.02594	80.402	0.017
10301.5	0.15528	144.724	0.01597	144.724	0.03446	229.146	0.04703	144.724	0.02943	144.724	0.02169	185.93	0.02526	391.96	0.04117	783.92	0.03184	293.97	0.02395	82.915	0.01721
10552.8	0.15077	148.744	0.01558	148.744	0.0334	235.176	0.04757	148.744	0.02965	148.744	0.02003	190.955	0.02409	402.01	0.03843	804.02	0.03034	301.508	0.02443	85.427	0.01667
10804	0.14365	152.764	0.01421	152.764	0.03114	241.206	0.04318	152.764	0.029	152.764	0.02047	195.98	0.02454	412.06	0.04031	824.121	0.03035	309.045	0.02445	87.94	0.01599
11055.3	0.14539	156.784	0.01447	156.784	0.03139	247.236	0.04163	156.784	0.02823	156.784	0.01902	201.005	0.02429	422.111	0.04001	844.221	0.02778	316.583	0.0231	90.452	0.01679
11306.5	0.13965	160.804	0.01333	160.804	0.03129	253.266	0.04378	160.804	0.0266	160.804	0.01928	206.03	0.0224	432.161	0.03947	864.322	0.0264	324.121	0.02292	92.965	0.01479
11557.8	0.14365	164.824	0.01354	164.824	0.03198	259.296	0.04461	164.824	0.02678	164.824	0.01853	211.055	0.02297	442.211	0.03466	884.422	0.0265	331.658	0.02332	95.477	0.01497
11809	0.13615	168.844	0.01316	168.844	0.02953	265.327	0.04196	168.844	0.02611	168.844	0.0189	216.08	0.02286	452.261	0.03675	904.523	0.02629	339.196	0.02193	97.99	0.01463
12060.3	0.13547	172.864	0.01219	172.864	0.02949	271.357	0.04252	172.864	0.02587	172.864	0.01793	221.106	0.02258	462.312	0.03647	924.623	0.02616	346.734	0.0214	100.503	0.0152
12311.6	0.13082	176.884	0.0118	176.884	0.03042	277.387	0.04131	176.884	0.02532	176.884	0.01677	226.131	0.02251	472.362	0.03298	944.724	0.02556	354.271	0.02209	103.015	0.01404
12562.8	0.13036	180.905	0.01147	180.905	0.0282	283.417	0.04067	180.905	0.02549	180.905	0.01664	231.156	0.02221	482.412	0.03627	964.824	0.02487	361.809	0.02081	105.528	0.01442
12814.1	0.13232	184.925	0.0118	184.925	0.0277	289.447	0.04012	184.925	0.02425	184.925	0.01619	236.181	0.02197	492.462	0.03349	984.925	0.02523	369.347	0.02224	108.04	0.01415
13065.3	0.12517	188.945	0.01139	188.945	0.02712	295.477	0.03822	188.945	0.02431	188.945	0.01582	241.206	0.01981	502.513	0.0349	1005.03	0.02343	376.884	0.02066	110.553	0.01388
13316.6	0.12651	192.965	0.01098	192.965	0.02719	301.508	0.03841	192.965	0.02273	192.965	0.01628	246.231	0.02053	512.563	0.03531	1025.13	0.02328	384.422	0.02049	113.065	0.01297
13567.8	0.11847	196.985	0.0107	196.985	0.02755	307.538	0.03741	196.985	0.02302	196.985	0.01542	251.256	0.01941	522.613	0.03252	1045.23	0.02268	391.96	0.02056	115.578	0.01361
13819.1	0.11936	201.005	0.01015	201.005	0.02626	313.568	0.03631	201.005	0.02236	201.005	0.01507	256.281	0.01897	532.663	0.03266	1065.33	0.02238	399.497	0.0204	118.09	0.01248
14070.4	0.11319	205.025	0.01045	205.025	0.02546	319.598	0.03605	205.025	0.02217	205.025	0.01505	261.307	0.0197	542.714	0.03318	1085.43	0.02314	407.035	0.01883	120.603	0.0126
14321.6	0.11339	209.045	0.00946	209.045	0.02606	325.628	0.03361	209.045	0.02168	209.045	0.01487	266.332	0.01992	552.764	0.03297	1105.53	0.02207	414.573	0.01741	123.116	0.01222
14572.9	0.11295	213.065	0.00971	213.065	0.02508	331.658	0.03609	213.065	0.02058	213.065	0.01459	271.357	0.02018	562.814	0.03239	1125.63	0.02156	422.111	0.01878	125.628	0.01141
14824.1	0.10773	217.085	0.00908	217.085	0.02546	337.688	0.0351	217.085	0.02173	217.085	0.01343	276.382	0.0187	572.864	0.03209	1145.73	0.02057	429.648	0.0185	128.141	0.01221
15075.4	0.11102	221.106	0.00933	221.106	0.02344	343.719	0.03351	221.106	0.01887	221.106	0.01294	281.407	0.01719	582.915	0.03101	1165.83	0.01977	437.186	0.01725	130.653	0.01231
15326.6	0.10476	225.126	0.00837	225.126	0.02372	349.749	0.03439	225.126	0.01962	225.126	0.0132	286.432	0.01718	592.965	0.02969	1185.93	0.02094	444.724	0.01851	133.166	0.0106
15577.9	0.10412	229.146	0.00829	229.146	0.02382	355.779	0.0347	229.146	0.02023	229.146	0.01283	291.457	0.01683	603.015	0.03055	1206.03	0.01953	452.261	0.01742	135.678	0.01163
15829.1	0.10285	233.166	0.0081	233.166	0.02355	361.809	0.03409	233.166	0.01917	233.166	0.01254	296.482	0.0172	613.065	0.02986	1226.13	0.01975	459.799	0.01726	138.191	0.01148
16080.4	0.1026	237.186	0.00817	237.186	0.02199	367.839	0.03347	237.186	0.01838	237.186	0.01288	301.508	0.01646	623.116	0.02939	1246.23	0.01804	467.337	0.01733	140.704	0.01127
16331.7	0.09641	241.206	0.00795	241.206	0.02263	373.869	0.03229	241.206	0.01873	241.206	0.01215	306.533	0.01636	633.166	0.02958	1266.33	0.01933	474.874	0.01625	143.216	0.01101
16582.9	0.09728	245.226	0.00788	245.226	0.02429	379.899	0.03157	245.226	0.01902	245.226	0.01163	311.558	0.01613	643.216	0.02878	1286.43	0.01875	482.412	0.01586	145.729	0.01051
16834.2	0.09589	249.246	0.00769	249.246	0.02202	385.93	0.03107	249.246	0.01793	249.246	0.01129	316.583	0.01562	653.266	0.02831	1306.53	0.01758	489.95	0.01738	148.241	0.01128
17085.4	0.09407	253.266	0.00727	253.266	0.02123	391.96	0.03052	253.266	0.01826	253.266	0.01132	321.608	0.01561	663.317	0.02775	1326.63	0.01718	497.487	0.01563	150.754	0.01019
17336.7	0.0917	257.286	0.00717	257.286	0.02125	397.99	0.03113	257.286	0.01811	257.286	0.01112	326.633	0.01542	673.367	0.02655	1346.73	0.01798	505.025	0.01612	153.266	0.0097
17587.9	0.09118	261.307	0.00628	261.307	0.02069	404.02	0.0306	261.307	0.01722	261.307	0.01103	331.658	0.01501	683.417	0.0278	1366.83	0.01774	512.563	0.01604	155.779	0.01022
17839.2	0.08937	265.327	0.0064	265.327	0.02143	410.05	0.02928	265.327	0.01745	265.327	0.01082	336.683	0.01524	693.467	0.02677	1386.94	0.0175	520.101	0.01571	158.291	0.00999
18090.5	0.08746	269.347	0.00655	269.347	0.01953	416.08	0.02863	269.347	0.01697	269.347	0.01054	341.709	0.01378	703.518	0.02492	1407.04	0.01624	527.638	0.01539	160.804	0.00909
18341.7	0.08545	273.367	0.00661	273.367	0.01936	422.111	0.02867	273.367	0.01701	273.367	0.01039	346.734	0.0147	713.568	0.02578	1427.14	0.01658	535.176	0.01474	163.317	0.00932
18593	0.08766	277.387	0.00635	277.387	0.0193	428.141	0.02852	277.387	0.01639	277.387	0.00992	351.759	0.01411	723.618	0.02448	1447.24	0.0166	542.714	0.01442	165.829	0.00989
18844.2	0.08407	281.407	0.00603	281.407	0.01964	434.171	0.02795	281.407	0.01487	281.407	0.00989	356.784	0.01293	733.668	0.0257	1467.34	0.01608	550.251	0.01445	168.342	0.00919
19095.5	0.0764	285.427	0.00631	285.427	0.01915	440.201	0.02797	285.427	0.01631	285.427	0.01003	361.809	0.01309	743.719	0.0258	1487.44	0.01476	557.789	0.01488	170.854	0.00869
19346.7	0.08038	289.447	0.00516	289.447	0.01735	446.231	0.0275	289.447	0.01478	289.447	0.00943	366.834	0.0127	753.769	0.02401	1507.54	0.01504	565.327	0.01363	173.367	0.00838
19598	0.08008	293.467	0.00558	293.467	0.01779	452.261	0.02858	293.467	0.01498	293.467	0.00879	371.859	0.01316	763.819	0.02537	1527.64	0.01516	572.864	0.01376	175.879	0.00918
19849.2	0.07976	297.487	0.00593	297.487	0.01709	458.291	0.0285	297.487	0.0148	297.487	0.00893	376.884	0.01167	773.869	0.02409	1547.74	0.01407	580.402	0.01339	178.392	0.0085
20100.5	0.07469	301.508	0.0047	301.508	0.01863	464.322	0.02703	301.508	0.01516	301.508	0.00895	381.91	0.01161	783.92	0.0241	1567.84	0.01397	587.94	0.01415	180.905	0.00778
		305.528	0.00448	305.528	0.01765	470.352	0.02742	305.528	0.01436	305.528	0.00894	386.935	0.01262	793.97	0.0224	1587.94	0.01282	595.477	0.01159	183.417	0.00794
		309.548	0.00483	309.548	0.01817	476.382	0.02689	309.548	0.01418	309.548	0.00798	391.96	0.01252	804.02	0.02258	1608.04	0.01325	603.015	0.01319	185.93	0.00778
		313.568	0.0052	313.568	0.01812	482.412	0.02515	313.568	0.01393	313.568	0.00808	396.985	0.01136	814.07	0.02115	1628.14	0.01416	610.553	0.01276	188.442	0.00815
		317.588	0.00471	317.588	0.01696	488.442	0.02589	317.588	0.01338	317.588	0.00858	402.01	0.01146	824.121	0.02261	1648.24	0.01324	618.09	0.01285	190.955	0.00817
		321.608	0.00454	321.608	0.01736	494.472	0.02639	321.608	0.01373	321.608	0.00728	407.035	0.01124	834.171	0.02106	1668.34	0.01352	625.628	0.01161	193.467	0.00712
		325.628	0.0048	325.628	0.01704	500.503	0.02533	325.628	0.01377	325.628	0.00745	412.06	0.01112	844.221	0.02096	1688.44	0.01173	633.166	0.01126	195.98	0.00653
		329.648	0.00444	329.648	0.01602	506.533	0.02625	329.648	0.01301	329.648	0.00785	417.085	0.01123	854.271	0.02185	1708.54	0.01285	640.704	0.01165	198.492	0.0068
		333.668	0.00406	333.668	0.01606	512.563	0.02616	333.668	0.01335	333.668	0.00684	422.111	0.01087	864.322	0.02063	1728.64	0.01246	648.241	0.01236	201.005	0.00708
		337.688	0.00441	337.688	0.01577	518.593	0.02481	337.688	0.01312	337.688	0.00694	427.136	0.01056	874.372	0.02036	1748.74	0.01248	655.779	0.01094	203.518	0.00684
		341.709	0.00407	341.709	0.01517	524.623	0.0251	341.709	0.01227	341.709	0.00728	432.161	0.00998	884.422	0.0208	1768.84	0.01247	663.317	0.01094	206.03	0.0066
		345.729	0.00409	345.729	0.01485	530.653	0.02505	345.729	0.01143	345.729	0.00705	437.186	0.01034	894.472	0.01993	1788.94	0.01183	670.854	0.01084	208.543	0.00617
		349.749	0.0039	349.749	0.01538	536.683	0.02578	349.749	0.01173	349.749	0.0068	442.211	0.01044	904.523	0.01927	1809.05	0.01194	678.392	0.01054	211.055	0.00662
		353.769	0.00384	353.769	0.01475	542.714	0.02325	353.769	0.01176	353.769	0.00651	447.236	0.01016	914.573	0.0188	1829.15	0.01145	685.93	0.01066	213.568	0.00665
		357.789	0.00368	357.789	0.0147	548.744	0.02392	357.789	0.0111	357.789	0.00629	452.261	0.01012	924.623	0.01898	1849.25	0.01024	693.467	0.01022	216.08	0.00639
		361.809	0.0037	361.809	0.01472	554.774	0.02215	361.809	0.0116	361.809	0.00634	457.286	0.00986	934.673	0.01886	1869.35	0.01107	701.005	0.01035	218.593	0.00623
		365.829	0.00354	365.829	0.01419	560.804	0.02362	365.829	0.01092	365.829	0.00627	462.312	0.00896	944.724	0.01976	1889.45	0.01064	708.543	0.00994	221.106	0.00632
		369.849	0.0034	369.849	0.01384	566.834	0.02283	369.849	0.01045	369.849	0.0066	467.337	0.0097	954.774	0.01807	1909.55	0.01144	716.08	0.01044	223.618	0.00612
		373.869	0.00398	373.869	0.01383	572.864	0.02156	373.869	0.01033	373.869	0.00621	472.362	0.00899	964.824	0.01839	1929.65	0.01145	723.618	0.01035	226.131	0.00561
		377.889	0.00323	377.889	0.0137	578.894	0.02251	377.889	0.01072	377.889	0.00592	477.387	0.0086	974.874	0.01707	1949.75	0.00952	731.156	0.00881	228.643	0.00573
		381.91	0.00351	381.91	0.01319	584.925	0.02196	381.91	0.01035	381.91	0.00547	482.412	0.0087	984.925	0.01732	1969.85	0.01073	738.693	0.00934	231.156	0.00567
		385.93	0.00279	385.93	0.01394	590.955	0.02157	385.93	0.01021	385.93	0.00622	487.437	0.00863	994.975	0.01755	1989.95	0.01066	746.231	0.01014	233.668	0.00537
		389.95	0.0031	389.95	0.01292	596.985	0.02089	389.95	0.01008	389.95	0.00587	492.462	0.00838	1005.03	0.01752	2010.05	0.0099	753.769	0.00878	236.181	0.00522
		393.97	0.00296	393.97	0.01307	603.015	0.02095	393.97	0.01021	393.97	0.00531	497.487	0.00793	1015.08	0.01695	2030.15	0.00983	761.307	0.00842	238.693	0.00497
		397.99	0.00301	397.99	0.01305	609.045	0.01987	397.99	0.01045	397.99	0.00509	502.513	0.00907	1025.13	0.01677	2050.25	0.01	768.844	0.00861	241.206	0.00507
		402.01	0.003	402.01	0.01283	615.075	0.01991	402.01	0.00947	402.01	0.00512	507.538	0.00793	1035.18	0.0171	2070.35	0.00955	776.382	0.00875	243.719	0.00538
		406.03	0.00267	406.03	0.01227	621.106	0.02043	406.03	0.00933	406.03	0.00522	512.563	0.00791	1045.23	0.01665	2090.45	0.00926	783.92	0.00866	246.231	0.00494
		410.05	0.00281	410.05	0.01255	627.136	0.02023	410.05	0.00962	410.05	0.00528	517.588	0.0088	1055.28	0.0152	2110.55	0.0095	791.457	0.0087	248.744	0.0054
		414.07	0.00257	414.07	0.0122	633.166	0.02059	414.07	0.00948	414.07	0.00461	522.613	0.00788	1065.33	0.0155	2130.65	0.01025	798.995	0.00842	251.256	0.00525
		418.09	0.00263	418.09	0.01203	639.196	0.01939	418.09	0.0096	418.09	0.00541	527.638	0.0075	1075.38	0.01556	2150.75	0.00875	806.533	0.00806	253.769	0.00485
		422.111	0.00255	422.111	0.01205	645.226	0.01967	422.111	0.00919	422.111	0.00473	532.663	0.00798	1085.43	0.01565	2170.85	0.00883	814.07	0.00805	256.281	0.00447
		426.131	0.0026	426.131	0.01232	651.256	0.01908	426.131	0.00878	426.131	0.00468	537.688	0.00738	1095.48	0.01493	2190.96	0.00893	821.608	0.0077	258.794	0.00498
		430.151	0.00279	430.151	0.01209	657.286	0.01843	430.151	0.00856	430.151	0.00484	542.714	0.00796	1105.53	0.01635	2211.05	0.00887	829.146	0.0082	261.307	0.00421
		434.171	0.00236	434.171	0.01142	663.317	0.01829	434.171	0.00897	434.171	0.00424	547.739	0.00729	1115.58	0.01493	2231.16	0.00902	836.683	0.00852	263.819	0.00475
		438.191	0.00254	438.191	0.0114	669.347	0.01862	438.191	0.00832	438.191	0.00444	552.764	0.00688	1125.63	0.01572	2251.26	0.00922	844.221	0.00821	266.332	0.00415
		442.211	0.00243	442.211	0.01129	675.377	0.01789	442.211	0.00826	442.211	0.00438	557.789	0.00684	1135.68	0.01395	2271.36	0.00808	851.759	0.00815	268.844	0.00437
		446.231	0.00229	446.231	0.01056	681.407	0.0177	446.231	0.00857	446.231	0.00449	562.814	0.00703	1145.73	0.01463	2291.46	0.00838	859.296	0.00749	271.357	0.00427
		450.251	0.00227	450.251	0.01032	687.437	0.01733	450.251	0.00799	450.251	0.00439	567.839	0.00692	1155.78	0.01413	2311.56	0.0084	866.834	0.00733	273.869	0.00411
		454.271	0.00233	454.271	0.01017	693.467	0.01775	454.271	0.00881	454.271	0.00413	572.864	0.00701	1165.83	0.01413	2331.66	0.00777	874.372	0.00745	276.382	0.00417
		458.291	0.00216	458.291	0.00969	699.497	0.01796	458.291	0.00799	458.291	0.00385	577.889	0.00687	1175.88	0.01322	2351.76	0.00807	881.91	0.00694	278.894	0.00395
		462.312	0.00191	462.312	0.01022	705.528	0.01666	462.312	0.00851	462.312	0.00411	582.915	0.00667	1185.93	0.01419	2371.86	0.00833	889.447	0.00728	281.407	0.00377
		466.332	0.00211	466.332	0.00982	711.558	0.01677	466.332	0.00731	466.332	0.00407	587.94	0.00668	1195.98	0.01289	2391.96	0.00798	896.985	0.00678	283.92	0.00403
		470.352	0.00185	470.352	0.00998	717.588	0.01547	470.352	0.0079	470.352	0.00391	592.965	0.00643	1206.03	0.01387	2412.06	0.00758	904.523	0.00698	286.432	0.00394
		474.372	0.00205	474.372	0.0101	723.618	0.01693	474.372	0.00778	474.372	0.00414	597.99	0.00603	1216.08	0.01459	2432.16	0.00749	912.06	0.00661	288.945	0.00384
		478.392	0.00171	478.392	0.00974	729.648	0.01621	478.392	0.00743	478.392	0.00384	603.015	0.00563	1226.13	0.0133	2452.26	0.00756	919.598	0.00675	291.457	0.00385
		482.412	0.00233	482.412	0.01022	735.678	0.01617	482.412	0.00753	482.412	0.00374	608.04	0.006	1236.18	0.01287	2472.36	0.00733	927.136	0.00664	293.97	0.0038
		486.432	0.00196	486.432	0.00993	741.709	0.01628	486.432	0.00706	486.432	0.00387	613.065	0.00629	1246.23	0.01256	2492.46	0.00739	934.673	0.0066	296.482	0.0035
		490.452	0.00166	490.452	0.00982	747.739	0.01502	490.452	0.0067	490.452	0.00367	618.09	0.00574	1256.28	0.01307	2512.56	0.00746	942.211	0.00691	298.995	0.00395
		494.472	0.00208	494.472	0.00882	753.769	0.01555	494.472	0.0072	494.472	0.00315	623.116	0.00612	1266.33	0.01228	2532.66	0.00733	949.749	0.00582	301.508	0.00341
		498.492	0.00196	498.492	0.01015	759.799	0.01549	498.492	0.00609	498.492	0.00348	628.141	0.00536	1276.38	0.01361	2552.76	0.00684	957.286	0.00699	304.02	0.00379
		502.513	0.00164	502.513	0.00968	765.829	0.01551	502.513	0.00697	502.513	0.00378	633.166	0.00587	1286.43	0.01253	2572.86	0.00719	964.824	0.00626	306.533	0.00337
		506.533	0.0018	506.533	0.00918	771.859	0.01469	506.533	0.00633	506.533	0.00363	638.191	0.00521	1296.48	0.01211	2592.97	0.00722	972.362	0.0062	309.045	0.00342
		510.553	0.00191	510.553	0.00952	777.889	0.01496	510.553	0.00693	510.553	0.00301	643.216	0.00572	1306.53	0.01222	2613.06	0.00717	979.899	0.00622	311.558	0.0032
		514.573	0.0017	514.573	0.00917	783.92	0.01465	514.573	0.00733	514.573	0.00334	648.241	0.00548	1316.58	0.01156	2633.17	0.00663	987.437	0.00599	314.07	0.00292
		518.593	0.00177	518.593	0.00852	789.95	0.01456	518.593	0.00658	518.593	0.0034	653.266	0.0054	1326.63	0.01178	2653.27	0.00632	994.975	0.00596	316.583	0.0031
		522.613	0.00164	522.613	0.00825	795.98	0.01422	522.613	0.00629	522.613	0.00341	658.291	0.00533	1336.68	0.01135	2673.37	0.00675	1002.51	0.00616	319.095	0.00322
		526.633	0.00161	526.633	0.00869	802.01	0.01503	526.633	0.00612	526.633	0.00312	663.317	0.00512	1346.73	0.01093	2693.47	0.00632	1010.05	0.00555	321.608	0.00337
		530.653	0.00194	530.653	0.00915	808.04	0.01419	530.653	0.00622	530.653	0.0031	668.342	0.00488	1356.78	0.01131	2713.57	0.00615	1017.59	0.00591	324.121	0.00332
		534.673	0.00161	534.673	0.00864	814.07	0.01316	534.673	0.00611	534.673	0.00323	673.367	0.00501	1366.83	0.01221	2733.67	0.00636	1025.13	0.00583	326.633	0.00298
		538.693	0.00163	538.693	0.0086	820.101	0.01322	538.693	0.00618	538.693	0.0026	678.392	0.00492	1376.88	0.01132	2753.77	0.00645	1032.66	0.00584	329.146	0.00294
		542.714	0.00153	542.714	0.00779	826.131	0.01327	542.714	0.00646	542.714	0.00321	683.417	0.00503	1386.94	0.01169	2773.87	0.00653	1040.2	0.00566	331.658	0.00273
		546.734	0.00171	546.734	0.00817	832.161	0.01325	546.734	0.0064	546.734	0.00307	688.442	0.00472	1396.98	0.01089	2793.97	0.00687	1047.74	0.00546	334.171	0.00263
		550.754	0.00136	550.754	0.00802	838.191	0.01293	550.754	0.00579	550.754	0.00314	693.467	0.00439	1407.04	0.01036	2814.07	0.00618	1055.28	0.00535	336.683	0.00274
		554.774	0.00157	554.774	0.00822	844.221	0.01297	554.774	0.00621	554.774	0.00281	698.492	0.0047	1417.08	0.01135	2834.17	0.00604	1062.81	0.00506	339.196	0.0028
		558.794	0.00158	558.794	0.00773	850.251	0.01319	558.794	0.00609	558.794	0.003	703.518	0.00441	1427.14	0.01056	2854.27	0.00646	1070.35	0.00532	341.709	0.00271
		562.814	0.00156	562.814	0.00789	856.281	0.0122	562.814	0.00558	562.814	0.00307	708.543	0.0046	1437.19	0.01051	2874.37	0.00584	1077.89	0.00494	344.221	0.00265
		566.834	0.0016	566.834	0.00723	862.312	0.01215	566.834	0.00562	566.834	0.00233	713.568	0.00459	1447.24	0.01039	2894.47	0.00604	1085.43	0.00526	346.734	0.00264
		570.854	0.00135	570.854	0.00797	868.342	0.01213	570.854	0.00572	570.854	0.00254	718.593	0.00438	1457.29	0.01079	2914.57	0.00599	1092.96	0.00474	349.246	0.0026
		574.874	0.0014	574.874	0.00822	874.372	0.01275	574.874	0.00589	574.874	0.00253	723.618	0.00399	1467.34	0.00982	2934.67	0.00559	1100.5	0.0052	351.759	0.00233
		578.894	0.00161	578.894	0.00759	880.402	0.01271	578.894	0.00559	578.894	0.00242	728.643	0.00403	1477.39	0.0103	2954.77	0.006	1108.04	0.00492	354.271	0.00248
		582.915	0.00141	582.915	0.00746	886.432	0.01253	582.915	0.00561	582.915	0.00253	733.668	0.00389	1487.44	0.01006	2974.87	0.00553	1115.58	0.00491	356.784	0.00248
		586.935	0.00126	586.935	0.00757	892.462	0.01241	586.935	0.00508	586.935	0.00251	738.693	0.00383	1497.49	0.01062	2994.98	0.00527	1123.12	0.00491	359.296	0.00244
		590.955	0.0013	590.955	0.0067	898.492	0.01155	590.955	0.00482	590.955	0.00235	743.719	0.00381	1507.54	0.00941	3015.07	0.00522	1130.65	0.0047	361.809	0.00259
		594.975	0.0016	594.975	0.00757	904.523	0.01135	594.975	0.00547	594.975	0.0022	748.744	0.00408	1517.59	0.00995	3035.18	0.0051	1138.19	0.00435	364.322	0.0029
		598.995	0.00135	598.995	0.0068	910.553	0.01182	598.995	0.00481	598.995	0.0022	753.769	0.00444	1527.64	0.01003	3055.28	0.0057	1145.73	0.00452	366.834	0.00227
		603.015	0.00121	603.015	0.00716	916.583	0.01191	603.015	0.00485	603.015	0.0023	758.794	0.00396	1537.69	0.00956	3075.38	0.0054	1153.27	0.00421	369.347	0.0023
		607.035	0.00165	607.035	0.00672	922.613	0.011	607.035	0.00459	607.035	0.00227	763.819	0.00382	1547.74	0.00977	3095.48	0.0056	1160.8	0.00472	371.859	0.00223
		611.055	0.00104	611.055	0.00667	928.643	0.01118	611.055	0.0046	611.055	0.00233	768.844	0.00339	1557.79	0.00921	3115.58	0.00502	1168.34	0.00414	374.372	0.00232
		615.075	0.00136	615.075	0.00645	934.673	0.01056	615.075	0.00442	615.075	0.00204	773.869	0.00332	1567.84	0.00928	3135.68	0.00495	1175.88	0.0043	376.884	0.0022
		619.095	0.00123	619.095	0.00685	940.704	0.01061	619.095	0.00483	619.095	0.00208	778.894	0.00334	1577.89	0.00845	3155.78	0.00515	1183.42	0.00453	379.397	0.0024
		623.116	0.00133	623.116	0.00643	946.734	0.01102	623.116	0.0047	623.116	0.00204	783.92	0.00399	1587.94	0.00908	3175.88	0.00519	1190.95	0.00459	381.91	0.0023
		627.136	0.00121	627.136	0.00722	952.764	0.01132	627.136	0.00476	627.136	0.002	788.945	0.00338	1597.99	0.00909	3195.98	0.00504	1198.49	0.00472	384.422	0.00227
		631.156	0.00119	631.156	0.0063	958.794	0.01061	631.156	0.00476	631.156	0.00194	793.97	0.00357	1608.04	0.00925	3216.08	0.00479	1206.03	0.00398	386.935	0.00218
		635.176	0.0008035	635.176	0.00585	964.824	0.01122	635.176	0.00397	635.176	0.00209	798.995	0.00366	1618.09	0.00887	3236.18	0.00494	1213.57	0.0038	389.447	0.00199
		639.196	0.0009815	639.196	0.0066	970.854	0.01099	639.196	0.0048	639.196	0.00192	804.02	0.00346	1628.14	0.00882	3256.28	0.00523	1221.11	0.00405	391.96	0.00197
		643.216	0.0009475	643.216	0.00573	976.884	0.0107	643.216	0.00415	643.216	0.00212	809.045	0.00349	1638.19	0.00878	3276.38	0.00483	1228.64	0.00404	394.472	0.00203
		647.236	0.00134	647.236	0.00613	982.915	0.01001	647.236	0.00412	647.236	0.00193	814.07	0.00302	1648.24	0.009	3296.48	0.00468	1236.18	0.00438	396.985	0.00188
		651.256	0.0009815	651.256	0.0057	988.945	0.01069	651.256	0.00417	651.256	0.00191	819.095	0.00323	1658.29	0.00891	3316.58	0.00485	1243.72	0.00389	399.497	0.00207
		655.276	0.00108	655.276	0.00645	994.975	0.00998	655.276	0.00411	655.276	0.00198	824.121	0.00308	1668.34	0.00817	3336.68	0.00482	1251.26	0.00372	402.01	0.0019
		659.296	0.0009705	659.296	0.00599	1001.01	0.0103	659.296	0.00453	659.296	0.00178	829.146	0.00312	1678.39	0.00768	3356.78	0.00516	1258.79	0.004	404.523	0.00201
		663.317	0.00101	663.317	0.00599	1007.03	0.00966	663.317	0.00382	663.317	0.00209	834.171	0.00298	1688.44	0.00838	3376.88	0.00483	1266.33	0.004	407.035	0.00185
		667.337	0.0008815	667.337	0.00635	1013.07	0.00967	667.337	0.0041	667.337	0.00159	839.196	0.00323	1698.49	0.00816	3396.99	0.00457	1273.87	0.00376	409.548	0.00211
		671.357	0.00115	671.357	0.00614	1019.09	0.00999	671.357	0.00397	671.357	0.0018	844.221	0.00309	1708.54	0.00813	3417.08	0.0042	1281.41	0.00381	412.06	0.002
		675.377	0.00107	675.377	0.00605	1025.13	0.00947	675.377	0.00388	675.377	0.00198	849.246	0.00307	1718.59	0.00772	3437.19	0.00448	1288.94	0.0039	414.573	0.00185
		679.397	0.0009705	679.397	0.00578	1031.16	0.00962	679.397	0.00339	679.397	0.00177	854.271	0.00313	1728.64	0.00809	3457.29	0.00447	1296.48	0.00372	417.085	0.00195
		683.417	0.00118	683.417	0.00537	1037.19	0.00927	683.417	0.00327	683.417	0.00164	859.296	0.00312	1738.69	0.00808	3477.39	0.00467	1304.02	0.00319	419.598	0.00189
		687.437	0.00127	687.437	0.00546	1043.22	0.0096	687.437	0.00432	687.437	0.00168	864.322	0.00303	1748.74	0.0076	3497.49	0.00449	1311.56	0.00391	422.111	0.00207
		691.457	0.00108	691.457	0.00525	1049.25	0.00915	691.457	0.00396	691.457	0.00167	869.347	0.00317	1758.79	0.00793	3517.59	0.00469	1319.09	0.00389	424.623	0.00168
		695.477	0.00124	695.477	0.00555	1055.28	0.0092	695.477	0.0038	695.477	0.00165	874.372	0.00267	1768.84	0.00768	3537.69	0.00432	1326.63	0.00344	427.136	0.00194
		699.497	0.0009145	699.497	0.00545	1061.31	0.00977	699.497	0.00356	699.497	0.00181	879.397	0.00276	1778.89	0.00702	3557.79	0.0041	1334.17	0.00342	429.648	0.00163
		703.518	0.0009925	703.518	0.00534	1067.34	0.00962	703.518	0.00363	703.518	0.00188	884.422	0.00291	1788.94	0.00801	3577.89	0.00404	1341.71	0.00348	432.161	0.00168
		707.538	0.0007705	707.538	0.00499	1073.37	0.00809	707.538	0.00349	707.538	0.00151	889.447	0.00282	1798.99	0.00758	3597.99	0.00419	1349.25	0.00315	434.673	0.0017
		711.558	0.0006145	711.558	0.00528	1079.4	0.00909	711.558	0.00346	711.558	0.00172	894.472	0.00307	1809.05	0.00725	3618.09	0.004	1356.78	0.00296	437.186	0.0016
		715.578	0.0008595	715.578	0.0055	1085.43	0.00778	715.578	0.00363	715.578	0.00144	899.497	0.00264	1819.09	0.00701	3638.19	0.00425	1364.32	0.00362	439.698	0.00157
		719.598	0.00114	719.598	0.00514	1091.46	0.00893	719.598	0.00327	719.598	0.00162	904.523	0.00251	1829.15	0.00645	3658.29	0.00412	1371.86	0.00326	442.211	0.00158
		723.618	0.0009365	723.618	0.00483	1097.49	0.00813	723.618	0.00385	723.618	0.00149	909.548	0.00286	1839.2	0.00702	3678.39	0.00416	1379.4	0.00343	444.724	0.00158
		727.638	0.00108	727.638	0.00506	1103.52	0.00799	727.638	0.0032	727.638	0.00152	914.573	0.00276	1849.25	0.00758	3698.49	0.00387	1386.94	0.00352	447.236	0.00144
		731.658	0.0009255	731.658	0.00468	1109.55	0.00827	731.658	0.00327	731.658	0.00152	919.598	0.0024	1859.3	0.00695	3718.59	0.00397	1394.47	0.00294	449.749	0.00158
		735.678	0.0009705	735.678	0.00495	1115.58	0.00903	735.678	0.00317	735.678	0.00152	924.623	0.00257	1869.35	0.0067	3738.69	0.00383	1402.01	0.003	452.261	0.00174
		739.698	0.0009925	739.698	0.0045	1121.61	0.00799	739.698	0.00342	739.698	0.00132	929.648	0.00273	1879.4	0.00699	3758.79	0.00387	1409.55	0.00323	454.774	0.0014
		743.719	0.0008475	743.719	0.00454	1127.64	0.00835	743.719	0.00309	743.719	0.00143	934.673	0.0022	1889.45	0.00675	3778.89	0.00399	1417.08	0.00328	457.286	0.00148
		747.739	0.0008035	747.739	0.00465	1133.67	0.00797	747.739	0.00331	747.739	0.00158	939.698	0.00271	1899.5	0.00666	3799	0.00385	1424.62	0.00313	459.799	0.0012
		751.759	0.00107	751.759	0.00493	1139.7	0.00803	751.759	0.00336	751.759	0.00152	944.724	0.00224	1909.55	0.00687	3819.09	0.00402	1432.16	0.00316	462.312	0.00139
		755.779	0.0007925	755.779	0.00449	1145.73	0.00742	755.779	0.00295	755.779	0.00133	949.749	0.00261	1919.6	0.00619	3839.2	0.00362	1439.7	0.0029	464.824	0.00133
		759.799	0.0008925	759.799	0.00452	1151.76	0.00751	759.799	0.00319	759.799	0.0013	954.774	0.002	1929.65	0.00671	3859.3	0.00345	1447.24	0.00308	467.337	0.00139
		763.819	0.00101	763.819	0.00448	1157.79	0.00739	763.819	0.00306	763.819	0.00158	959.799	0.00238	1939.7	0.00661	3879.4	0.00379	1454.77	0.00311	469.849	0.00141
		767.839	0.0008705	767.839	0.00417	1163.82	0.00766	767.839	0.0029	767.839	0.00129	964.824	0.00219	1949.75	0.00599	3899.5	0.00356	1462.31	0.00308	472.362	0.00149
		771.859	0.0009815	771.859	0.00473	1169.85	0.00811	771.859	0.00282	771.859	0.00108	969.849	0.00234	1959.8	0.00667	3919.6	0.00378	1469.85	0.00266	474.874	0.00142
		775.879	0.00131	775.879	0.00439	1175.88	0.00743	775.879	0.00275	775.879	0.00137	974.874	0.0019	1969.85	0.00638	3939.7	0.00377	1477.39	0.00322	477.387	0.00123
		779.899	0.0009145	779.899	0.00407	1181.91	0.00741	779.899	0.00226	779.899	0.00118	979.899	0.00248	1979.9	0.00669	3959.8	0.00355	1484.93	0.00256	479.899	0.00152

## Sheet: Dataset 3
HgBr 16092021 14	HgBr 16092021 14	HgBr 16092021 16	HgBr 16092021 16	HgBr 16092021 17	HgBr 16092021 17	HgBr 16092021 18	HgBr 16092021 18	HgBr 16092021 19	HgBr 16092021 19	HgBr 16092021 20	HgBr 16092021 20	HgBr 16092021 21	HgBr 16092021 21	HgBr 16092021 23	HgBr 16092021 23
[O3]/molecule cm-3	552426000000000	[O3]/molecule cm-3	115028000000000	[O3]/molecule cm-3	34545700000000	[O3]0/molecule cm-3	379490000000000	[O3]0/molecule cm-3	287116000000000	[O3]0/molecule cm-3	22318500000000	[O3]0/molecule cm-3	273633000000000	[O3]0/molecule cm-3	0
pf	0.46	pf	0.46	pf	0.46	pf	0.46	pf	0.46	pf	0.46	pf	0.46	pf	0
t/us	HgBr LIF Signal	t/us	HgBr LIF Signal	t/us	HgBr LIF Signal	t/us	HgBr LIF Signal	t/us	HgBr LIF Signal	t/us	HgBr LIF Signal	t/us	HgBr LIF Signal	t/us	HgBr LIF Signal
-100	-0.000121778	-100.009	1.875e-05	-100	1.22222e-05	-99.994	0.000105	-100.016	-4.00833e-05	-100	1.02222e-05	-99.994	1.00833e-05	-2700	-0.000264556
-93.75	-5.57778e-05	-92.316	-7.025e-05	-90	9.02222e-05	-94.112	-4e-05	-92.872	-6.08333e-06	-90	4.32222e-05	-94.112	8.80833e-05	-2400	0.000491444
-87.5	1.12222e-05	-84.623	4.075e-05	-80	1.22222e-05	-88.23	5e-06	-85.728	-2.90833e-05	-80	-0.000123778	-88.23	0.000121083	-2100	0.000158444
-81.25	0.000100222	-76.93	7.375e-05	-70	-0.000187778	-82.348	-7e-06	-78.584	-0.000151083	-70	-0.000234778	-82.348	-0.000100917	-1800	0.000435444
-75	-5.57778e-05	-69.237	4.075e-05	-60	9.02222e-05	-76.466	3.8e-05	-71.44	-0.000118083	-60	0.000132222	-76.466	-0.000100917	-1500	0.000191444
-68.75	-0.000133778	-61.544	7.75e-06	-50	2.32222e-05	-70.584	8.2e-05	-64.296	0.000104917	-50	0.000154222	-70.584	-3.39167e-05	-1200	-0.000530556
-62.5	4.42222e-05	-53.851	-4.825e-05	-40	-3.17778e-05	-64.702	5e-06	-57.152	-4.00833e-05	-40	2.12222e-05	-64.702	3.20833e-05	-900	-0.000264556
-56.25	7.82222e-05	-46.158	-0.00010425	-30	-2.07778e-05	-58.82	2.7e-05	-50.008	5.99167e-05	-30	-3.47778e-05	-58.82	-1.19167e-05	-600	-0.000475556
-50	0.000133222	-38.465	-9.225e-05	-20	1.22222e-05	-52.938	-6.2e-05	-42.864	0.000126917	-20	3.22222e-05	-52.938	5.50833e-05	-300	0.000258444
-43.75	4.42222e-05	-30.772	2.975e-05	-10	-6.47778e-05	-47.056	-4e-05	-35.72	9.39167e-05	-10	-5.67778e-05	-47.056	4.30833e-05	0	-0.000208556
-37.5	6.62222e-05	-23.079	7.75e-06	0	2.32222e-05	-41.174	-0.000118	-28.576	4.91667e-06	0	-7.77778e-07	-41.174	-3.39167e-05	150.754	0.166635
-31.25	-0.000155778	-15.386	9.575e-05	15.075	0.0800122	-35.292	5e-06	-21.432	-6.08333e-06	15.075	0.0898322	-35.292	-6.79167e-05	301.508	0.25558
-25	-2.17778e-05	-7.693	8.475e-05	30.151	0.12029	-29.41	-1.8e-05	-14.288	9.39167e-05	30.151	0.133021	-29.41	5.50833e-05	452.261	0.250813
-18.75	-3.37778e-05	0	-7.025e-05	45.226	0.112257	-23.528	0.000116	-7.144	0.000148917	45.226	0.12961	-23.528	-0.000267917	603.015	0.249946
-12.5	-3.37778e-05	5.025	0.0706737	60.302	0.0977682	-17.646	0.000127	0	3.79167e-05	60.302	0.123321	-17.646	0.000121083	753.769	0.242924
-6.25	-7.77778e-05	10.05	0.102274	75.377	0.100879	-11.764	2.7e-05	4.02	0.0628939	75.377	0.120832	-11.764	9.90833e-05	904.523	0.233891
0	-3.37778e-05	15.075	0.100719	90.452	0.0991122	-5.882	0.000127	8.04	0.0862049	90.452	0.12021	-5.882	-9.16667e-07	1055.28	0.227513
2.513	0.000111222	20.101	0.104774	105.528	0.0924352	0	-7.3e-05	12.06	0.0838489	105.528	0.113676	0	-0.000189917	1206.03	0.225513
5.025	0.0678552	25.126	0.0876958	120.603	0.0837232	2.513	0.061816	16.08	0.0827269	120.603	0.112143	2.513	0.00488808	1356.78	0.221835
7.538	0.0925222	30.151	0.0882847	135.678	0.0926902	5.025	0.089049	20.101	0.0722269	135.678	0.101365	5.025	0.00682108	1507.54	0.221324
10.05	0.0822112	35.176	0.0872737	150.754	0.0750572	7.538	0.078871	24.121	0.0659159	150.754	0.105954	7.538	0.00701008	1658.29	0.214858
12.563	0.0790222	40.201	0.0822627	165.829	0.0740682	10.05	0.074627	28.141	0.0657379	165.829	0.0963762	10.05	0.00577708	1809.05	0.202858
15.075	0.0699442	45.226	0.0827848	180.905	0.0746352	12.563	0.069005	32.161	0.0599269	180.905	0.0982652	12.563	0.00638808	1959.8	0.206691
17.588	0.0674662	50.251	0.0772407	195.98	0.0749232	15.075	0.071138	36.181	0.0564379	195.98	0.0998762	15.075	0.00617708	2110.55	0.204502
20.101	0.0594222	55.276	0.0688297	211.055	0.0644572	17.588	0.062271	40.201	0.0544269	211.055	0.0997542	17.588	0.00565508	2261.31	0.203358
22.613	0.0587442	60.302	0.0746737	226.131	0.0684462	20.101	0.061249	44.221	0.0515819	226.131	0.100876	20.101	0.00487708	2412.06	0.202458
25.126	0.0551332	65.327	0.0689078	241.206	0.0627682	22.613	0.057582	48.241	0.0504379	241.206	0.10001	22.613	0.00548808	2562.81	0.200169
27.638	0.0542442	70.352	0.0647298	256.281	0.0634122	25.126	0.053882	52.261	0.0463379	256.281	0.0928542	25.126	0.00492108	2713.57	0.186291
30.151	0.0503442	75.377	0.0655407	271.357	0.0634012	27.638	0.05276	56.281	0.0454159	271.357	0.0878542	27.638	0.00436608	2864.32	0.196924
32.663	0.0452552	80.402	0.0621958	286.432	0.0612352	30.151	0.050938	60.302	0.0420049	286.432	0.0803212	30.151	0.00427708	3015.07	0.18578
35.176	0.0447112	85.427	0.0580408	301.508	0.0582232	32.663	0.045771	64.322	0.0453049	301.508	0.0908762	32.663	0.00403208	3165.83	0.191302
37.688	0.0444552	90.452	0.0567737	316.583	0.0537572	35.176	0.046793	68.342	0.0396489	316.583	0.0853882	35.176	0.00389908	3316.58	0.18238
40.201	0.0412002	95.477	0.0565737	331.658	0.0522682	37.688	0.044505	72.362	0.0403709	331.658	0.0826652	37.688	0.00393208	3467.34	0.181546
42.714	0.0383662	100.503	0.0524078	346.734	0.0555122	40.201	0.040138	76.382	0.0388049	346.734	0.0833102	40.201	0.00374308	3618.09	0.184491
45.226	0.0372552	105.528	0.0520077	361.809	0.0517682	42.714	0.039416	80.402	0.0382599	361.809	0.0817762	42.714	0.00319908	3768.84	0.181313
47.739	0.0374892	110.553	0.0533628	376.884	0.0480682	45.226	0.039271	84.422	0.0349489	376.884	0.0821882	45.226	0.00348808	3919.6	0.172546
50.251	0.0376552	115.578	0.0548078	391.96	0.0468122	47.739	0.037093	88.442	0.0363269	391.96	0.0776882	47.739	0.00333208	4070.35	0.175346
52.764	0.0367662	120.603	0.0486738	407.035	0.0486682	50.251	0.037505	92.462	0.0352709	407.035	0.0819432	50.251	0.00307708	4221.11	0.174169
55.276	0.0308552	125.628	0.0500958	422.111	0.0457792	52.764	0.037427	96.482	0.0324819	422.111	0.0691212	52.764	0.00285508	4371.86	0.17568
57.789	0.0343442	130.653	0.0496077	437.186	0.0468572	55.276	0.034538	100.503	0.0337819	437.186	0.0729882	55.276	0.00306608	4522.61	0.185124
60.302	0.0327892	135.678	0.0488738	452.261	0.0425352	57.789	0.035049	104.523	0.0335159	452.261	0.0724432	57.789	0.00322108	4673.37	0.163946
62.814	0.0306332	140.704	0.0484188	467.337	0.0439012	60.302	0.033938	108.543	0.0281939	467.337	0.0689992	60.302	0.00301008	4824.12	0.153135
65.327	0.0304552	145.729	0.0447188	482.412	0.0421122	62.814	0.03196	112.563	0.0310819	482.412	0.0716322	62.814	0.00261008	4974.87	0.169502
67.839	0.0294332	150.754	0.0439628	497.487	0.0397122	65.327	0.033649	116.583	0.0283489	497.487	0.0687322	65.327	0.00266608	5125.63	0.167535
70.352	0.0281552	155.779	0.0420958	512.563	0.0417572	67.839	0.031482	120.603	0.0278159	512.563	0.0653432	67.839	0.00262108	5276.38	0.172646
72.864	0.0294892	160.804	0.0400298	527.638	0.0424902	70.352	0.030005	124.623	0.0284269	527.638	0.0669322	70.352	0.00252108	5427.14	0.171458
75.377	0.0273662	165.829	0.0428847	542.714	0.0402792	72.864	0.030382	128.643	0.0277379	542.714	0.0665322	72.864	0.00259908	5577.89	0.16458
77.889	0.0286002	170.854	0.0428518	557.789	0.0372902	75.377	0.029438	132.663	0.0265599	557.789	0.0632992	75.377	0.00239908	5728.64	0.162213
80.402	0.0271662	175.879	0.0419187	572.864	0.0387232	77.889	0.028271	136.683	0.0266379	572.864	0.0607882	77.889	0.00284308	5879.4	0.158813
82.915	0.0266662	180.905	0.0391628	587.94	0.0372352	80.402	0.02716	140.704	0.0259049	587.94	0.0663992	80.402	0.00243208	6030.15	0.158402
85.427	0.0242662	185.93	0.0389297	603.015	0.0347122	82.915	0.026916	144.724	0.0259049	603.015	0.0625322	82.915	0.00208808	6180.9	0.159224
87.94	0.0256112	190.955	0.0376958	618.09	0.0361572	85.427	0.026505	148.744	0.0261269	618.09	0.0582992	85.427	0.00246608	6331.66	0.161202
90.452	0.0258442	195.98	0.0361957	633.166	0.0354462	87.94	0.026327	152.764	0.0245269	633.166	0.0605882	87.94	0.00252108	6482.41	0.161202
92.965	0.0249332	201.005	0.0374077	648.241	0.0333902	90.452	0.025805	156.784	0.0250269	648.241	0.0561102	90.452	0.00228808	6633.17	0.150558
95.477	0.0233112	206.03	0.0353518	663.317	0.0315232	92.965	0.026005	160.804	0.0232489	663.317	0.0593212	92.965	0.00224308	6783.92	0.154302
97.99	0.0221892	211.055	0.0358957	678.392	0.0317122	95.477	0.025693	164.824	0.0213709	678.392	0.0551652	95.477	0.00236608	6934.67	0.155791
100.503	0.0220002	216.08	0.0373407	693.467	0.0308012	97.99	0.025627	168.844	0.0216599	693.467	0.0515322	97.99	0.00214308	7085.43	0.157691
103.015	0.0217112	221.106	0.0354517	708.543	0.0315682	100.503	0.022671	172.864	0.0222819	708.543	0.0536212	100.503	0.00193208	7236.18	0.151258
105.528	0.0216552	226.131	0.0363957	723.618	0.0294232	103.015	0.02306	176.884	0.0208599	723.618	0.0545992	103.015	0.00222108	7386.94	0.150291
108.04	0.0217442	231.156	0.0355297	738.693	0.0288232	105.528	0.024482	180.905	0.0232489	738.693	0.0487102	105.528	0.00181008	7537.69	0.150124
110.553	0.0213552	236.181	0.0350847	753.769	0.0270352	108.04	0.022205	184.925	0.0222709	753.769	0.0490882	108.04	0.00192108	7688.44	0.146813
113.065	0.0215002	241.206	0.0341738	768.844	0.0289352	110.553	0.022749	188.945	0.0206709	768.844	0.0490542	110.553	0.00198808	7839.2	0.139558
115.578	0.0186662	246.231	0.0326958	783.92	0.0289572	113.065	0.021393	192.965	0.0204709	783.92	0.0449102	113.065	0.00189908	7989.95	0.15188
118.09	0.0186892	251.256	0.0335847	798.995	0.0273232	115.578	0.021593	196.985	0.0204269	798.995	0.0477322	115.578	0.00181008	8140.7	0.138913
120.603	0.0201892	256.281	0.0319958	814.07	0.0250232	118.09	0.022216	201.005	0.0202819	814.07	0.0446882	118.09	0.00213208	8291.46	0.143513
123.116	0.0187552	261.307	0.0331627	829.146	0.0280902	120.603	0.020549	205.025	0.0207159	829.146	0.0449992	120.603	0.00189908	8442.21	0.140769
125.628	0.0189442	266.332	0.0321517	844.221	0.0269902	123.116	0.021627	209.045	0.0188379	844.221	0.0448432	123.116	0.00182108	8592.96	0.143246
128.141	0.0183222	271.357	0.0315187	859.296	0.0248352	125.628	0.020793	213.065	0.0183049	859.296	0.0414212	125.628	0.00174308	8743.72	0.14298
130.653	0.0174662	276.382	0.0303628	874.372	0.0236682	128.141	0.019605	217.085	0.0176489	874.372	0.0441542	128.141	0.00179908	8894.47	0.142958
133.166	0.0177112	281.407	0.0290627	889.447	0.0236462	130.653	0.019138	221.106	0.0182939	889.447	0.0392542	130.653	0.00181008	9045.23	0.14708
135.678	0.0164662	286.432	0.0319407	904.523	0.0233232	133.166	0.019927	225.126	0.0177489	904.523	0.0427542	133.166	0.00163208	9195.98	0.143391
138.191	0.0166002	291.457	0.0293517	919.598	0.0221572	135.678	0.018482	229.146	0.0183819	919.598	0.0416992	135.678	0.00182108	9346.73	0.136813
140.704	0.0161002	296.482	0.0291297	934.673	0.0224902	138.191	0.018949	233.166	0.0181599	934.673	0.0394212	138.191	0.00161008	9497.49	0.144091
143.216	0.0159332	301.508	0.0272077	949.749	0.0235232	140.704	0.017205	237.186	0.0179489	949.749	0.0406652	140.704	0.00169908	9648.24	0.136169
145.729	0.0171662	306.533	0.0295627	964.824	0.0227902	143.216	0.019338	241.206	0.0167489	964.824	0.0400212	143.216	0.00175508	9799	0.133091
148.241	0.0155782	311.558	0.0288188	979.899	0.0213902	145.729	0.018793	245.226	0.0173709	979.899	0.0376212	145.729	0.00151008	9949.75	0.140102
150.754	0.0162112	316.583	0.0276738	994.975	0.0208792	148.241	0.01816	249.246	0.0152049	994.975	0.0381212	148.241	0.00164308	10100.5	0.131346
153.266	0.0151552	321.608	0.0278518	1010.05	0.0196572	150.754	0.017749	253.266	0.0163599	1010.05	0.0365102	150.754	0.00141008	10251.3	0.129935
155.779	0.0148552	326.633	0.0268408	1025.13	0.0194122	153.266	0.016871	257.286	0.0157709	1025.13	0.0389102	153.266	0.00151008	10402	0.138013
158.291	0.0143552	331.658	0.0265517	1040.2	0.0205572	155.779	0.016727	261.307	0.0157049	1040.2	0.0359652	155.779	0.00157708	10552.8	0.123124
160.804	0.0137442	336.683	0.0253298	1055.28	0.0186902	158.291	0.016127	265.327	0.0144159	1055.28	0.0371762	158.291	0.00146608	10703.5	0.134113
163.317	0.0146332	341.709	0.0261847	1070.35	0.0200572	160.804	0.015905	269.347	0.0143269	1070.35	0.0350992	160.804	0.00143208	10854.3	0.129858
165.829	0.0141442	346.734	0.0255847	1085.43	0.0204682	163.317	0.016282	273.367	0.0155269	1085.43	0.0328992	163.317	0.00153208	11005	0.137346
168.342	0.0137892	351.759	0.0252407	1100.5	0.0190122	165.829	0.015627	277.387	0.0150489	1100.5	0.0332762	165.829	0.00148808	11155.8	0.123291
170.854	0.0128442	356.784	0.0262518	1115.58	0.0189572	168.342	0.016405	281.407	0.0139599	1115.58	0.0334992	168.342	0.00152108	11306.5	0.135946
173.367	0.0136112	361.809	0.0244077	1130.65	0.0175122	170.854	0.014938	285.427	0.0144049	1130.65	0.0336322	170.854	0.00134308	11457.3	0.119502
175.879	0.0125552	366.834	0.0229297	1145.73	0.0195012	173.367	0.015638	289.447	0.0145599	1145.73	0.0340542	173.367	0.00143208	11608	0.11778
178.392	0.0123782	371.859	0.0255077	1160.8	0.0185792	175.879	0.015438	293.467	0.0140939	1160.8	0.0333652	175.879	0.00152108	11758.8	0.128458
180.905	0.0116892	376.884	0.0227408	1175.88	0.0193012	178.392	0.013993	297.487	0.0127709	1175.88	0.0314882	178.392	0.00145508	11909.5	0.127402
183.417	0.0115782	381.91	0.0246078	1190.95	0.0179572	180.905	0.01406	301.508	0.0149489	1190.95	0.0327882	180.905	0.00121008	12060.3	0.114991
185.93	0.0120332	386.935	0.0228297	1206.03	0.0174462	183.417	0.015138	305.528	0.0138819	1206.03	0.0322432	183.417	0.00123208	12211.1	0.117724
188.442	0.0113112	391.96	0.0222957	1221.11	0.0175792	185.93	0.014338	309.548	0.0130709	1221.11	0.0320652	185.93	0.00117708	12361.8	0.126235
190.955	0.0116892	396.985	0.0232627	1236.18	0.0171122	188.442	0.014249	313.568	0.0130819	1236.18	0.0310882	188.442	0.00154308	12512.6	0.121758
193.467	0.0111442	402.01	0.0222077	1251.26	0.0166352	190.955	0.014105	317.588	0.0120599	1251.26	0.0308212	190.955	0.00122108	12663.3	0.110969
195.98	0.0118222	407.035	0.0243188	1266.33	0.0169232	193.467	0.013793	321.608	0.0119709	1266.33	0.0313432	193.467	0.00108808	12814.1	0.11458
198.492	0.0109662	412.06	0.0219738	1281.41	0.0158682	195.98	0.013205	325.628	0.0118489	1281.41	0.0294542	195.98	0.00145508	12964.8	0.121969
201.005	0.0106442	417.085	0.0225517	1296.48	0.0156012	198.492	0.013327	329.648	0.0123819	1296.48	0.0275652	198.492	0.00112108	13115.6	0.112935
203.518	0.0106552	422.111	0.0216077	1311.56	0.0162902	201.005	0.012371	333.668	0.0105269	1311.56	0.0315542	201.005	0.00125508	13266.3	0.119613
206.03	0.0106002	427.136	0.0211187	1326.63	0.0138682	203.518	0.013393	337.688	0.0114489	1326.63	0.0259212	203.518	0.00125508	13417.1	0.118258
208.543	0.0100892	432.161	0.0204958	1341.71	0.0146462	206.03	0.011893	341.709	0.0117819	1341.71	0.0289992	206.03	0.00122108	13567.8	0.11518
211.055	0.00960022	437.186	0.0201407	1356.78	0.0142792	208.543	0.012316	345.729	0.0111379	1356.78	0.0289762	208.543	0.00134308	13718.6	0.118802
213.568	0.00945522	442.211	0.0201957	1371.86	0.0141122	211.055	0.012849	349.749	0.0104379	1371.86	0.0267322	211.055	0.00105508	13869.3	0.111491
216.08	0.00975522	447.236	0.0205078	1386.94	0.0151462	213.568	0.011782	353.769	0.0114489	1386.94	0.0253432	213.568	0.00119908	14020.1	0.109991
218.593	0.00917822	452.261	0.0193297	1402.01	0.0141462	216.08	0.012338	357.789	0.0107049	1402.01	0.0258542	216.08	0.000877083	14170.9	0.114146
221.106	0.00926622	457.286	0.0188628	1417.08	0.0140682	218.593	0.011271	361.809	0.0101819	1417.08	0.0279322	218.593	0.00121008	14321.6	0.102535
223.618	0.00953322	462.312	0.0205078	1432.16	0.0149352	221.106	0.011016	365.829	0.0102939	1432.16	0.0243992	221.106	0.000799083	14472.4	0.11708
226.131	0.00924422	467.337	0.0197848	1447.24	0.0146352	223.618	0.011538	369.849	0.0100049	1447.24	0.0261432	223.618	0.00104308	14623.1	0.105858
228.643	0.00872222	472.362	0.0192187	1462.31	0.0135792	226.131	0.011705	373.869	0.0102819	1462.31	0.0254212	226.131	0.00108808	14773.9	0.102435
231.156	0.00808922	477.387	0.0188407	1477.39	0.0135352	228.643	0.009893	377.889	0.0103489	1477.39	0.0258322	228.643	0.000921083	14924.6	0.107969
233.668	0.00846622	482.412	0.0194738	1492.46	0.0132462	231.156	0.010905	381.91	0.00955992	1492.46	0.0260882	231.156	0.00101008	15075.4	0.111235
236.181	0.00842222	487.437	0.0201628	1507.54	0.0122122	233.668	0.010749	385.93	0.00934892	1507.54	0.0227542	233.668	0.000866083	15226.1	0.105324
238.693	0.00810022	492.462	0.0170628	1522.61	0.0129572	236.181	0.009927	389.95	0.00958192	1522.61	0.0240762	236.181	0.00102108	15376.9	0.107124
241.206	0.00831122	497.487	0.0187077	1537.69	0.0131462	238.693	0.01006	393.97	0.00960492	1537.69	0.0260212	238.693	0.00117708	15527.6	0.107835
243.719	0.00902222	502.513	0.0191188	1552.76	0.0128572	241.206	0.010293	397.99	0.00862692	1552.76	0.0246322	241.206	0.00101008	15678.4	0.105635
246.231	0.00785522	507.538	0.0194957	1567.84	0.0122012	243.719	0.00946	402.01	0.00814892	1567.84	0.0237762	243.719	0.000910083	15829.1	0.100246
248.744	0.00793322	512.563	0.0173078	1582.92	0.0120572	246.231	0.009182	406.03	0.00840492	1582.92	0.0245432	246.231	0.000899083	15979.9	0.106569
251.256	0.00744422	517.588	0.0177738	1597.99	0.0125352	248.744	0.010149	410.05	0.00883792	1597.99	0.0210992	248.744	0.000999083	16130.7	0.0949584
253.769	0.00725522	522.613	0.0182737	1613.06	0.0115232	251.256	0.00976	414.07	0.00903792	1613.06	0.0226652	251.256	0.00112108	16281.4	0.0968024
256.281	0.00753322	527.638	0.0170077	1628.14	0.0119352	253.769	0.009427	418.09	0.00808192	1628.14	0.0243212	253.769	0.00111008	16432.2	0.100713
258.794	0.00765522	532.663	0.0162298	1643.22	0.0122122	256.281	0.00936	422.111	0.00828192	1643.22	0.0217212	256.281	0.000866083	16582.9	0.100669
261.307	0.00682222	537.688	0.0183847	1658.29	0.0103792	258.794	0.008927	426.131	0.00847092	1658.29	0.0212992	258.794	0.000988083	16733.7	0.102002
263.819	0.00772222	542.714	0.0173517	1673.37	0.0107122	261.307	0.00956	430.151	0.00754892	1673.37	0.0223882	261.307	0.000921083	16884.4	0.102769
266.332	0.00658922	547.739	0.0151848	1688.44	0.0108232	263.819	0.008605	434.171	0.00798192	1688.44	0.0232102	263.819	0.000810083	17035.2	0.0994584
268.844	0.00692222	552.764	0.0173738	1703.52	0.0107792	266.332	0.008705	438.191	0.00804892	1703.52	0.0215762	266.332	0.000821083	17185.9	0.0947464
271.357	0.00671122	557.789	0.0162627	1718.59	0.0104352	268.844	0.008649	442.211	0.00803792	1718.59	0.0207762	268.844	0.000743083	17336.7	0.10258
273.869	0.00721122	562.814	0.0154518	1733.67	0.0115572	271.357	0.008705	446.231	0.00754892	1733.67	0.0230322	271.357	0.000888083	17487.4	0.0963914
276.382	0.00657822	567.839	0.0160297	1748.74	0.0101902	273.869	0.008793	450.251	0.00797092	1748.74	0.0217652	273.869	0.000888083	17638.2	0.0978464
278.894	0.00644422	572.864	0.0158187	1763.82	0.00940122	276.382	0.008771	454.271	0.00692692	1763.82	0.0216322	276.382	0.000910083	17788.9	0.0987244
281.407	0.00618922	577.889	0.0148407	1778.89	0.0100572	278.894	0.008093	458.291	0.00700492	1778.89	0.0211322	278.894	0.00112108	17939.7	0.0877804
283.92	0.00601122	582.915	0.0157298	1793.97	0.0106462	281.407	0.007782	462.312	0.00743792	1793.97	0.0215542	281.407	0.000777083	18090.5	0.0942584
286.432	0.00567822	587.94	0.0152408	1809.05	0.00851222	283.92	0.008738	466.332	0.00714892	1809.05	0.0203212	283.92	0.000966083	18241.2	0.0946024
288.945	0.00585522	592.965	0.0145188	1824.12	0.0103232	286.432	0.008227	470.352	0.00701592	1824.12	0.0201322	286.432	0.000855083	18392	0.0945354
291.457	0.00596622	597.99	0.0157188	1839.2	0.00900122	288.945	0.007693	474.372	0.00724892	1839.2	0.0194432	288.945	0.000866083	18542.7	0.0966244
293.97	0.00552222	603.015	0.0152078	1854.27	0.00865722	291.457	0.007527	478.392	0.00697092	1854.27	0.0191992	291.457	0.000977083	18693.5	0.0914024
296.482	0.00547822	608.04	0.0144517	1869.35	0.00875722	293.97	0.006893	482.412	0.00594892	1869.35	0.0204652	293.97	0.000932083	18844.2	0.0887464
298.995	0.00531122	613.065	0.0152298	1884.42	0.00922322	296.482	0.007349	486.432	0.00650492	1884.42	0.0206102	296.482	0.000732083	18995	0.0912804
301.508	0.00563322	618.09	0.0132298	1899.5	0.00811222	298.995	0.007793	490.452	0.00683792	1899.5	0.0208322	298.995	0.000821083	19145.7	0.0878694
304.02	0.00556622	623.116	0.0135298	1914.57	0.0100462	301.508	0.007493	494.472	0.00659392	1914.57	0.0199432	301.508	0.000699083	19296.5	0.0921694
306.533	0.00555522	628.141	0.0136738	1929.65	0.00904622	304.02	0.006649	498.492	0.00567092	1929.65	0.0196432	304.02	0.00105508	19447.2	0.0990914
309.045	0.00468922	633.166	0.0136957	1944.72	0.00881222	306.533	0.007738	502.513	0.00672692	1944.72	0.0204542	306.533	0.000755083	19598	0.0872914
311.558	0.00515522	638.191	0.0133957	1959.8	0.00912322	309.045	0.00696	506.533	0.00671592	1959.8	0.0181102	309.045	0.000721083	19748.7	0.0801354
314.07	0.00454422	643.216	0.0134077	1974.87	0.00866822	311.558	0.007649	510.553	0.00622692	1974.87	0.0187432	311.558	0.000643083	19899.5	0.0912584
316.583	0.00440022	648.241	0.0131737	1989.95	0.00874622	314.07	0.006938	514.573	0.00608192	1989.95	0.0171652	314.07	0.000643083	20050.3	0.0867804
319.095	0.00546622	653.266	0.0121627	2005.03	0.00932322	316.583	0.007005	518.593	0.00625992	2005.03	0.0182542	316.583	0.000743083
321.608	0.00481122	658.291	0.0129517	2020.1	0.00740122	319.095	0.006938	522.613	0.00640492	2020.1	0.0184762	319.095	0.000788083
324.121	0.00487822	663.317	0.0123517	2035.18	0.00803522	321.608	0.00636	526.633	0.00580492	2035.18	0.0186432	321.608	0.000832083
326.633	0.00466622	668.342	0.0130627	2050.25	0.00762322	324.121	0.006471	530.653	0.00560492	2050.25	0.0176542	324.121	0.000755083
329.146	0.00506622	673.367	0.0123407	2065.33	0.00804622	326.633	0.006271	534.673	0.00571592	2065.33	0.0176762	326.633	0.000699083
331.658	0.00471122	678.392	0.0127517	2080.4	0.00797922	329.146	0.006471	538.693	0.00547092	2080.4	0.0173992	329.146	0.000555083
334.171	0.00433322	683.417	0.0126847	2095.48	0.00759022	331.658	0.005871	542.714	0.00534892	2095.48	0.0180322	331.658	0.000943083
336.683	0.00398922	688.442	0.0119518	2110.55	0.00796822	334.171	0.006438	546.734	0.00523792	2110.55	0.0183762	334.171	0.000721083
339.196	0.00453322	693.467	0.0126298	2125.63	0.00840122	336.683	0.006393	550.754	0.00608192	2125.63	0.0173322	336.683	0.000521083
341.709	0.00403322	698.492	0.0112187	2140.7	0.00735722	339.196	0.006393	554.774	0.00544892	2140.7	0.0165652	339.196	0.000599083
344.221	0.00422222	703.518	0.0117958	2155.78	0.00692322	341.709	0.005616	558.794	0.00555992	2155.78	0.0167102	341.709	0.000566083
346.734	0.00446622	708.543	0.0121187	2170.85	0.00741222	344.221	0.00556	562.814	0.00498192	2170.85	0.0176992	344.221	0.000610083
349.246	0.00423322	713.568	0.0122737	2185.93	0.00764622	346.734	0.005938	566.834	0.00522692	2185.93	0.0169762	346.734	0.000566083
351.759	0.00392222	718.593	0.0119518	2201	0.00749022	349.246	0.006027	570.854	0.00495992	2201	0.0160882	349.246	0.000710083
354.271	0.00402222	723.618	0.0118297	2216.08	0.00700122	351.759	0.005305	574.874	0.00475992	2216.08	0.0158992	351.759	0.000455083
356.784	0.00382222	728.643	0.0116518	2231.16	0.00731222	354.271	0.005738	578.894	0.00484892	2231.16	0.0156432	354.271	0.000543083
359.296	0.00391122	733.668	0.0109298	2246.23	0.00700122	356.784	0.006116	582.915	0.00473792	2246.23	0.0165542	356.784	0.000732083
361.809	0.00378922	738.693	0.0103407	2261.31	0.00753522	359.296	0.006038	586.935	0.00501592	2261.31	0.0159542	359.296	0.000610083
364.322	0.00374422	743.719	0.0114298	2276.38	0.00602322	361.809	0.005505	590.955	0.00451592	2276.38	0.0166652	361.809	0.000677083
366.834	0.00380022	748.744	0.0111518	2291.46	0.00727922	364.322	0.005805	594.975	0.00498192	2291.46	0.0146102	364.322	0.000810083
369.347	0.00356622	753.769	0.0112408	2306.53	0.00656822	366.834	0.005393	598.995	0.00470492	2306.53	0.0161542	366.834	0.000666083
371.859	0.00367822	758.794	0.0100958	2321.61	0.00639022	369.347	0.004693	603.015	0.00433792	2321.61	0.0160322	369.347	0.000599083
374.372	0.00346622	763.819	0.0113078	2336.68	0.00711222	371.859	0.004827	607.035	0.00431592	2336.68	0.0137882	371.859	0.000599083
376.884	0.00350022	768.844	0.0104187	2351.76	0.00641222	374.372	0.005616	611.055	0.00415992	2351.76	0.0146432	374.372	0.000543083
379.397	0.00311122	773.869	0.0102518	2366.83	0.00674622	376.884	0.005327	615.075	0.00480492	2366.83	0.0158542	376.884	0.000521083
381.91	0.00333322	778.894	0.0105518	2381.91	0.00669022	379.397	0.004871	619.095	0.00433792	2381.91	0.0160542	379.397	0.000643083
384.422	0.00304422	783.92	0.00990775	2396.99	0.00617922	381.91	0.004593	623.116	0.00488192	2396.99	0.0158652	381.91	0.000566083
386.935	0.00322222	788.945	0.00954075	2412.06	0.00617922	384.422	0.004193	627.136	0.00395992	2412.06	0.0151322	384.422	0.000443083
389.447	0.00302222	793.97	0.00918475	2427.14	0.00637922	386.935	0.004771	631.156	0.00373792	2427.14	0.0156882	386.935	0.000432083
391.96	0.00290022	798.995	0.00951875	2442.21	0.00619022	389.447	0.004616	635.176	0.00400492	2442.21	0.0135652	389.447	0.000455083
394.472	0.00325522	804.02	0.00976275	2457.29	0.00639022	391.96	0.004416	639.196	0.00381592	2457.29	0.0141102	391.96	0.000721083
396.985	0.00323322	809.045	0.00962975	2472.36	0.00586822	394.472	0.004782	643.216	0.00404892	2472.36	0.0141882	394.472	0.000677083
399.497	0.00306622	814.07	0.00934075	2487.44	0.00553522	396.985	0.003782	647.236	0.00398192	2487.44	0.0154102	396.985	0.000477083
402.01	0.00278922	819.095	0.00852975	2502.51	0.00569022	399.497	0.004771	651.256	0.00413792	2502.51	0.0129652	399.497	0.000643083
404.523	0.00282222	824.121	0.00834075	2517.59	0.00582322	402.01	0.004171	655.276	0.00400492	2517.59	0.0139102	402.01	0.000543083
407.035	0.00256622	829.146	0.00904075	2532.66	0.00532322	404.523	0.004349	659.296	0.00393792	2532.66	0.0145102	404.523	0.000621083
409.548	0.00292222	834.171	0.00840775	2547.74	0.00560122	407.035	0.004305	663.317	0.00397092	2547.74	0.0143652	407.035	0.000555083
412.06	0.00282222	839.196	0.00840775	2562.81	0.00562322	409.548	0.004405	667.337	0.00354892	2562.81	0.0126542	409.548	0.000621083
414.573	0.00251122	844.221	0.00934075	2577.89	0.00599022	412.06	0.004171	671.357	0.00371592	2577.89	0.0138542	412.06	0.000477083
417.085	0.00282222	849.246	0.00872975	2592.97	0.00564622	414.573	0.003671	675.377	0.00358192	2592.97	0.0140542	414.573	0.000777083
419.598	0.00261122	854.271	0.00851875	2608.04	0.00615722	417.085	0.004027	679.397	0.00342692	2608.04	0.0137652	417.085	0.000410083
422.111	0.00286622	859.296	0.00877375	2623.12	0.00522322	419.598	0.004171	683.417	0.00344892	2623.12	0.0135212	419.598	0.000577083
424.623	0.00224422	864.322	0.00784075	2638.19	0.00534622	422.111	0.003971	687.437	0.00330492	2638.19	0.0131882	422.111	0.000410083
427.136	0.00264422	869.347	0.00877375	2653.27	0.00464622	424.623	0.003593	691.457	0.00343792	2653.27	0.0133322	424.623	0.000455083
429.648	0.00292222	874.372	0.00799575	2668.34	0.00516822	427.136	0.00386	695.477	0.00363792	2668.34	0.0133762	427.136	0.000377083
432.161	0.00277822	879.397	0.00887375	2683.42	0.00480122	429.648	0.003616	699.497	0.00327092	2683.42	0.0128762	429.648	0.000643083
434.673	0.00243322	884.422	0.00860775	2698.49	0.00505722	432.161	0.004138	703.518	0.00338192	2698.49	0.0127542	432.161	0.000510083
437.186	0.00260022	889.447	0.00770775	2713.57	0.00560122	434.673	0.003471	707.538	0.00310492	2713.57	0.0129882	434.673	0.000466083
439.698	0.00228922	894.472	0.00808475	2728.64	0.00492322	437.186	0.002971	711.558	0.00303792	2728.64	0.0138102	437.186	0.000455083
442.211	0.00225522	899.497	0.00707375	2743.72	0.00497922	439.698	0.003793	715.578	0.00250492	2743.72	0.0132102	439.698	0.000632083
444.724	0.00257822	904.523	0.00741875	2758.79	0.00482322	442.211	0.003871	719.598	0.00310492	2758.79	0.0132992	442.211	0.000399083
447.236	0.00237822	909.548	0.00757375	2773.87	0.00475722	444.724	0.003205	723.618	0.00270492	2773.87	0.0127992	444.724	0.000310083
449.749	0.00211122	914.573	0.00696275	2788.95	0.00483522	447.236	0.003716	727.638	0.00293792	2788.95	0.0128652	447.236	0.000621083
452.261	0.00228922	919.598	0.00782975	2804.02	0.00493522	449.749	0.003605	731.658	0.00294892	2804.02	0.0120992	449.749	0.000543083
454.774	0.00227822	924.623	0.00747375	2819.09	0.00491222	452.261	0.003305	735.678	0.00247092	2819.09	0.0123652	452.261	0.000421083
457.286	0.00212222	929.648	0.00759575	2834.17	0.00416822	454.774	0.00356	739.698	0.00291592	2834.17	0.0119992	454.774	0.000599083
459.799	0.00187822	934.673	0.00746275	2849.25	0.00424622	457.286	0.003282	743.719	0.00251592	2849.25	0.0135102	457.286	0.000432083
462.312	0.00201122	939.698	0.00804075	2864.32	0.00434622	459.799	0.002993	747.739	0.00321592	2864.32	0.0116102	459.799	0.000421083
464.824	0.00201122	944.724	0.00686275	2879.4	0.00430122	462.312	0.003605	751.759	0.00244892	2879.4	0.0110652	462.312	0.000221083
467.337	0.00225522	949.749	0.00690775	2894.47	0.00502322	464.824	0.003205	755.779	0.00267092	2894.47	0.0122102	464.824	0.000577083
469.849	0.00228922	954.774	0.00719575	2909.55	0.00423522	467.337	0.003293	759.799	0.00259392	2909.55	0.0120542	467.337	0.000555083
472.362	0.00215522	959.799	0.00691875	2924.62	0.00432322	469.849	0.002971	763.819	0.00258192	2924.62	0.0116652	469.849	0.000566083
474.874	0.00198922	964.824	0.00699575	2939.7	0.00479022	472.362	0.003116	767.839	0.00263792	2939.7	0.0120102	472.362	0.000399083
477.387	0.00198922	969.849	0.00699575	2954.77	0.00456822	474.874	0.003293	771.859	0.00255992	2954.77	0.0125542	474.874	0.000399083
479.899	0.00188922	974.874	0.00647375	2969.85	0.00424622	477.387	0.00316	775.879	0.00272692	2969.85	0.0117652	477.387	0.000332083
482.412	0.00205522	979.899	0.00702975	2984.93	0.00432322	479.899	0.00326	779.899	0.00242692	2984.93	0.0128102	479.899	0.000299083

## Sheet: Dataset 4
HgBr 17092021 18	HgBr 17092021 18	HgBr 17092021 19	HgBr 17092021 19	HgBr 17092021 20	HgBr 17092021 20	HgBr 17092021 21	HgBr 17092021 21	HgBr 17092021 22	HgBr 17092021 22	HgBr 17092021 23	HgBr 17092021 23	HgBr 17092021 24	HgBr 17092021 24
[O3]0/molecule cm-3	503000000000000	[O3]0/molecule cm-3	246000000000000	[O3]0/molecule cm-3	99200000000000	[O3]0/molecule cm-3	347000000000000	[O3]0/molecule cm-3	153000000000000	[O3]0/molecule cm-3	37600000000000	[O3]0/molecule cm-3	0
pf	0.1	pf	0.1	pf	0.1	pf	0.1	pf	0.1	pf	0.1	pf	0
t/us	HgBr LIF Signal	t/us	HgBr LIF Signal	t/us	HgBr LIF Signal	t/us	HgBr LIF Signal	t/us	HgBr LIF Signal	t/us	HgBr LIF Signal	t/us	HgBr LIF Signal
-18	-1.55556e-06	-18	-3.04444e-05	-36	-1.84444e-05	-27	-3.57778e-05	-27	-1.53333e-05	-90	-1.17778e-05	-1800	-1.7e-05
-16	-3.75556e-05	-16	-6.04444e-05	-32	-4.84444e-05	-24	-1.57778e-05	-24	-1.63333e-05	-80	1.92222e-05	-1600	5.6e-05
-14	-2.95556e-05	-14	1.55556e-05	-28	1.05556e-05	-21	-3.77778e-05	-21	6.66667e-06	-70	2.62222e-05	-1400	9e-06
-12	-1.55556e-05	-12	-8.44444e-06	-24	1.75556e-05	-18	4.42222e-05	-18	-5.33333e-06	-60	-7.77778e-07	-1200	-1e-05
-10	3.54444e-05	-10	-7.44444e-06	-20	1.55556e-05	-15	2.92222e-05	-15	4.96667e-05	-50	-3.77778e-05	-1000	-5.5e-05
-8	3.24444e-05	-8	7.55556e-06	-16	1.25556e-05	-12	1.32222e-05	-12	-6.33333e-06	-40	7.22222e-06	-800	-2.6e-05
-6	-1.05556e-05	-6	2.45556e-05	-12	8.55556e-06	-9	-4.77778e-06	-9	9.66667e-06	-30	-2.37778e-05	-600	4.5e-05
-4	1.14444e-05	-4	9.25556e-05	-8	3.35556e-05	-6	2.52222e-05	-6	-1.13333e-05	-20	7.22222e-06	-400	5.4e-05
-2	1.54444e-05	-2	-3.34444e-05	-4	-3.14444e-05	-3	-1.77778e-05	-3	-1.13333e-05	-10	1.42222e-05	-200	-5.6e-05
0	-1.45556e-05	0	-1.24444e-05	0	-3.44444e-05	0	8.22222e-06	0	3.06667e-05	0	-1.27778e-05	0	2.5e-05
0.669	0.00338944	0.669	0.00414856	1.338	0.00702256	1.003	0.00221722	1.003	0.00273767	3.344	0.00882622	66.89	0.011144
1.338	0.00599244	1.338	0.00757156	2.676	0.0117756	2.007	0.00695222	2.007	0.00817667	6.689	0.0143042	133.779	0.017235
2.007	0.00836744	2.007	0.00918856	4.013	0.0125546	3.01	0.00865922	3.01	0.0114057	10.033	0.0147152	200.669	0.016873
2.676	0.00842844	2.676	0.00960756	5.351	0.0113346	4.013	0.00858422	4.013	0.0107387	13.378	0.0136882	267.559	0.016875
3.344	0.00759044	3.344	0.00920856	6.689	0.0125726	5.017	0.00831522	5.017	0.0105007	16.722	0.0130752	334.448	0.017963
4.013	0.00793344	4.013	0.0101086	8.027	0.0116136	6.02	0.00793022	6.02	0.0108257	20.067	0.0130342	401.338	0.016551
4.682	0.00806244	4.682	0.00871556	9.365	0.0120316	7.023	0.00772222	7.023	0.0100507	23.411	0.0132232	468.227	0.016567
5.351	0.00729744	5.351	0.00974656	10.702	0.0109926	8.027	0.00768222	8.027	0.00971867	26.756	0.0134992	535.117	0.017467
6.02	0.00741144	6.02	0.00919756	12.04	0.0107576	9.03	0.00762622	9.03	0.0101527	30.1	0.0116942	602.007	0.017879
6.689	0.00680144	6.689	0.00822456	13.378	0.0111256	10.033	0.00707922	10.033	0.00978267	33.445	0.0134852	668.896	0.016662
7.358	0.00726544	7.358	0.00849156	14.716	0.0113926	11.037	0.00649322	11.037	0.00930867	36.789	0.0126032	735.786	0.016956
8.027	0.00674044	8.027	0.00790856	16.054	0.0108986	12.04	0.00711822	12.04	0.0105207	40.134	0.0122082	802.676	0.01551
8.696	0.00655444	8.696	0.00847956	17.391	0.0102036	13.043	0.00652422	13.043	0.00893467	43.478	0.0126912	869.565	0.016411
9.365	0.00599544	9.365	0.00846856	18.729	0.0100486	14.047	0.00715922	14.047	0.00911067	46.823	0.0116542	936.455	0.014816
10.033	0.00599544	10.033	0.00901556	20.067	0.0109046	15.05	0.00653722	15.05	0.00856667	50.167	0.0117682	1003.34	0.016191
10.702	0.00594744	10.702	0.00793456	21.405	0.00913056	16.054	0.00672722	16.054	0.00875967	53.512	0.0116782	1070.23	0.015011
11.371	0.00556344	11.371	0.00803856	22.742	0.00950256	17.057	0.00595022	17.057	0.00947667	56.856	0.0121912	1137.12	0.016189
12.04	0.00572844	12.04	0.00872256	24.08	0.00999456	18.06	0.00573822	18.06	0.00849667	60.201	0.0112042	1204.01	0.01394
12.709	0.00486144	12.709	0.00788156	25.418	0.00990456	19.064	0.00562322	19.064	0.00918467	63.545	0.0108392	1270.9	0.015945
13.378	0.00503544	13.378	0.00783956	26.756	0.0105116	20.067	0.00589322	20.067	0.00838467	66.89	0.0115062	1337.79	0.015301
14.047	0.00494744	14.047	0.00805856	28.094	0.0104956	21.07	0.00528422	21.07	0.00819767	70.234	0.0105022	1404.68	0.014695
14.716	0.00493344	14.716	0.00675756	29.431	0.00936456	22.074	0.00494722	22.074	0.00814467	73.579	0.0107312	1471.57	0.015082
15.385	0.00462044	15.385	0.00794856	30.769	0.00944156	23.077	0.00530322	23.077	0.00851967	76.923	0.0101782	1538.46	0.015619
16.054	0.00468144	16.054	0.00757256	32.107	0.00986856	24.08	0.00501422	24.08	0.00777867	80.268	0.0103552	1605.35	0.014375
16.722	0.00430944	16.722	0.00705456	33.445	0.0102116	25.084	0.00408822	25.084	0.00766267	83.612	0.00965922	1672.24	0.015705
17.391	0.00434844	17.391	0.00714856	34.783	0.00915056	26.087	0.00452222	26.087	0.00767967	86.957	0.0101862	1739.13	0.014304
18.06	0.00410144	18.06	0.00738956	36.12	0.00950756	27.09	0.00520422	27.09	0.00801367	90.301	0.0100692	1806.02	0.014555
18.729	0.00454944	18.729	0.00647656	37.458	0.00903156	28.094	0.00439522	28.094	0.00821567	93.645	0.00954322	1872.91	0.014952
19.398	0.00433544	19.398	0.00692856	38.796	0.00906056	29.097	0.00455022	29.097	0.00813367	96.99	0.0104642	1939.8	0.014869
20.067	0.00415244	20.067	0.00714156	40.134	0.00896256	30.1	0.00445222	30.1	0.00759267	100.334	0.00982222	2006.69	0.016173
20.736	0.00410944	20.736	0.00642356	41.472	0.00840856	31.104	0.00412722	31.104	0.00723867	103.679	0.00902922	2073.58	0.015461
21.405	0.00355744	21.405	0.00691456	42.809	0.00862056	32.107	0.00394722	32.107	0.00785667	107.023	0.00991922	2140.47	0.015035
22.074	0.00390744	22.074	0.00581356	44.147	0.00929056	33.11	0.00389622	33.11	0.00784467	110.368	0.00885922	2207.36	0.014269
22.742	0.00353644	22.742	0.00640756	45.485	0.00887356	34.114	0.00362022	34.114	0.00703767	113.712	0.00963322	2274.25	0.013783
23.411	0.00353844	23.411	0.00657756	46.823	0.00846956	35.117	0.00375822	35.117	0.00723667	117.057	0.00852722	2341.14	0.015181
24.08	0.00339644	24.08	0.00618856	48.161	0.00896356	36.12	0.00351222	36.12	0.00722067	120.401	0.00892122	2408.03	0.014263
24.749	0.00335344	24.749	0.00619556	49.498	0.00853956	37.124	0.00335722	37.124	0.00717267	123.746	0.00885822	2474.92	0.014984
25.418	0.00323744	25.418	0.00588556	50.836	0.00902256	38.127	0.00333322	38.127	0.00720367	127.09	0.00920722	2541.81	0.013556
26.087	0.00366844	26.087	0.00625456	52.174	0.00755856	39.13	0.00311422	39.13	0.00767367	130.435	0.00835622	2608.7	0.014271
26.756	0.00339044	26.756	0.00593156	53.512	0.00853756	40.134	0.00305822	40.134	0.00758267	133.779	0.00902622	2675.58	0.013852
27.425	0.00300644	27.425	0.00573456	54.849	0.00769056	41.137	0.00317322	41.137	0.00615467	137.124	0.00820922	2742.48	0.012794
28.094	0.00319244	28.094	0.00558556	56.187	0.00841356	42.14	0.00303322	42.14	0.00713667	140.468	0.00884822	2809.36	0.01386
28.763	0.00293044	28.763	0.00602656	57.525	0.00775356	43.144	0.00317422	43.144	0.00673567	143.813	0.00832522	2876.25	0.013485
29.431	0.00303044	29.431	0.00547556	58.863	0.00810456	44.147	0.00319322	44.147	0.00675067	147.157	0.00858522	2943.14	0.013564
30.1	0.00283344	30.1	0.00529656	60.201	0.00743456	45.151	0.00293222	45.151	0.00598067	150.502	0.00795622	3010.03	0.012883
30.769	0.00295044	30.769	0.00569356	61.538	0.00747356	46.154	0.00304922	46.154	0.00631667	153.846	0.00797222	3076.92	0.014265
31.438	0.00265344	31.438	0.00504756	62.876	0.00780156	47.157	0.00258722	47.157	0.00672467	157.191	0.00799422	3143.81	0.014535
32.107	0.00251344	32.107	0.00528256	64.214	0.00731256	48.161	0.00261022	48.161	0.00621767	160.535	0.00786622	3210.7	0.012834
32.776	0.00273444	32.776	0.00518656	65.552	0.00690356	49.164	0.00281322	49.164	0.00642067	163.88	0.00762822	3277.59	0.013476
33.445	0.00250644	33.445	0.00512356	66.89	0.00776856	50.167	0.00261222	50.167	0.00573967	167.224	0.00749922	3344.48	0.014202
34.114	0.00264644	34.114	0.00532856	68.227	0.00752556	51.171	0.00219522	51.171	0.00635667	170.569	0.00811322	3411.37	0.012874
34.783	0.00239544	34.783	0.00505556	69.565	0.00736256	52.174	0.00247922	52.174	0.00542567	173.913	0.00701122	3478.26	0.013019
35.452	0.00237044	35.452	0.00513256	70.903	0.00798556	53.177	0.00265622	53.177	0.00581767	177.258	0.00709522	3545.15	0.012983
36.12	0.00241944	36.12	0.00485456	72.241	0.00711556	54.181	0.00217222	54.181	0.00593967	180.602	0.00724722	3612.04	0.012954
36.789	0.00227544	36.789	0.00494656	73.579	0.00681856	55.184	0.00226622	55.184	0.00591367	183.946	0.00694322	3678.93	0.012772
37.458	0.00218144	37.458	0.00412356	74.916	0.00681556	56.187	0.00217922	56.187	0.00591867	187.291	0.00750522	3745.82	0.011766
38.127	0.00229444	38.127	0.00516256	76.254	0.00657356	57.191	0.00224722	57.191	0.00569567	190.635	0.00700222	3812.71	0.012875
38.796	0.00210844	38.796	0.00511756	77.592	0.00722356	58.194	0.00222422	58.194	0.00543867	193.98	0.00647622	3879.6	0.012443
39.465	0.00189844	39.465	0.00501156	78.93	0.00630056	59.197	0.00203422	59.197	0.00561767	197.324	0.00761922	3946.49	0.011874
40.134	0.00183644	40.134	0.00482856	80.268	0.00665356	60.201	0.00200622	60.201	0.00561767	200.669	0.00673122	4013.38	0.012873
40.803	0.00204244	40.803	0.00496156	81.605	0.00613556	61.204	0.00198222	61.204	0.00555767	204.013	0.00725422	4080.27	0.012426
41.472	0.00200444	41.472	0.00488256	82.943	0.00725056	62.207	0.00190722	62.207	0.00509567	207.358	0.00682222	4147.16	0.011844
42.14	0.00194244	42.14	0.00480456	84.281	0.00692256	63.211	0.00207222	63.211	0.00586067	210.702	0.00747722	4214.05	0.012415
42.809	0.00205044	42.809	0.00503856	85.619	0.00640956	64.214	0.00176422	64.214	0.00565967	214.047	0.00610622	4280.94	0.011567
43.478	0.00196244	43.478	0.00395456	86.957	0.00638956	65.217	0.00196322	65.217	0.00553767	217.391	0.00748622	4347.83	0.011039
44.147	0.00196844	44.147	0.00471156	88.294	0.00599256	66.221	0.00199522	66.221	0.00504967	220.736	0.00637822	4414.72	0.012396
44.816	0.00174144	44.816	0.00440556	89.632	0.00634756	67.224	0.00154722	67.224	0.00513867	224.08	0.00632222	4481.6	0.012107
45.485	0.00192044	45.485	0.00422156	90.97	0.00643956	68.227	0.00183822	68.227	0.00482467	227.425	0.00622122	4548.5	0.011706
46.154	0.00169244	46.154	0.00413756	92.308	0.00662556	69.231	0.00147822	69.231	0.00454067	230.769	0.00631722	4615.38	0.011634
46.823	0.00195244	46.823	0.00446856	93.645	0.00601756	70.234	0.00169522	70.234	0.00515967	234.114	0.00566322	4682.27	0.011263
47.492	0.00152844	47.492	0.00422156	94.983	0.00573256	71.237	0.00166522	71.237	0.00504767	237.458	0.00638722	4749.16	0.011762
48.161	0.00151544	48.161	0.00402456	96.321	0.00614256	72.241	0.00145622	72.241	0.00472467	240.803	0.00617222	4816.05	0.01117
48.829	0.00155544	48.829	0.00387856	97.659	0.00620456	73.244	0.00147022	73.244	0.00490667	244.147	0.00596522	4882.94	0.012402
49.498	0.00138544	49.498	0.00376456	98.997	0.00636956	74.247	0.00164322	74.247	0.00468767	247.492	0.00573122	4949.83	0.011825
50.167	0.00158344	50.167	0.00411256	100.334	0.00572456	75.251	0.00152622	75.251	0.00478067	250.836	0.00589122	5016.72	0.009834
50.836	0.00144144	50.836	0.00400356	101.672	0.00587856	76.254	0.00128922	76.254	0.00433267	254.181	0.00550222	5083.61	0.010872
51.505	0.00153544	51.505	0.00387856	103.01	0.00641556	77.258	0.00155022	77.258	0.00449367	257.525	0.00577122	5150.5	0.011
52.174	0.00147144	52.174	0.00382656	104.348	0.00552356	78.261	0.00147622	78.261	0.00483667	260.87	0.00541722	5217.39	0.010425
52.843	0.00161144	52.843	0.00393956	105.686	0.00599056	79.264	0.00142922	79.264	0.00462967	264.214	0.00537922	5284.28	0.011052
53.512	0.00132844	53.512	0.00371356	107.023	0.00605056	80.268	0.00126422	80.268	0.00461467	267.559	0.00540322	5351.17	0.011054
54.181	0.00125444	54.181	0.00347956	108.361	0.00539456	81.271	0.00119222	81.271	0.00403267	270.903	0.00565522	5418.06	0.010727
54.849	0.00137044	54.849	0.00385356	109.699	0.00547156	82.274	0.00137422	82.274	0.00429567	274.247	0.00576922	5484.95	0.011225
55.518	0.00145244	55.518	0.00363256	111.037	0.00504856	83.278	0.00126822	83.278	0.00419367	277.592	0.00582922	5551.84	0.010721
56.187	0.00139544	56.187	0.00379356	112.375	0.00597056	84.281	0.00144222	84.281	0.00474767	280.936	0.00522122	5618.73	0.010956
56.856	0.00137244	56.856	0.00310156	113.712	0.00579856	85.284	0.00147622	85.284	0.00401467	284.281	0.00507722	5685.62	0.01066
57.525	0.00137844	57.525	0.00405356	115.05	0.00579156	86.288	0.00127722	86.288	0.00444767	287.625	0.00534422	5752.51	0.01161
58.194	0.00150344	58.194	0.00348256	116.388	0.00551856	87.291	0.00107822	87.291	0.00382467	290.97	0.00548422	5819.4	0.011554
58.863	0.00135644	58.863	0.00343156	117.726	0.00543956	88.294	0.00131022	88.294	0.00393967	294.314	0.00514922	5886.29	0.011283
59.532	0.00113744	59.532	0.00317656	119.064	0.00541856	89.298	0.00136622	89.298	0.00423567	297.659	0.00495422	5953.18	0.011686
60.201	0.00127444	60.201	0.00353956	120.401	0.00563756	90.301	0.00116522	90.301	0.00347667	301.003	0.00469322	6020.07	0.010215
60.87	0.00114344	60.87	0.00359956	121.739	0.00556556	91.304	0.00114222	91.304	0.00426667	304.348	0.00529622	6086.96	0.010336
61.538	0.00118544	61.538	0.00365356	123.077	0.00490456	92.308	0.00128922	92.308	0.00388267	307.692	0.00440822	6153.85	0.010301
62.207	0.00136744	62.207	0.00312156	124.415	0.00486356	93.311	0.00114422	93.311	0.00385567	311.037	0.00493922	6220.74	0.010421
62.876	0.00113344	62.876	0.00337556	125.753	0.00506556	94.314	0.00109922	94.314	0.00367267	314.381	0.00490922	6287.62	0.010014
63.545	0.00123944	63.545	0.00298656	127.09	0.00523356	95.318	0.000976222	95.318	0.00367067	317.726	0.00466922	6354.52	0.01109
64.214	0.000990444	64.214	0.00311156	128.428	0.00495156	96.321	0.00107322	96.321	0.00387867	321.07	0.00442322	6421.4	0.009952
64.883	0.00114344	64.883	0.00306656	129.766	0.00486456	97.324	0.00119022	97.324	0.00385767	324.415	0.00490122	6488.29	0.010552
65.552	0.00105744	65.552	0.00286256	131.104	0.00498056	98.328	0.00125722	98.328	0.00363867	327.759	0.00460922	6555.18	0.010287
66.221	0.00108244	66.221	0.00275156	132.441	0.00483956	99.331	0.000990222	99.331	0.00303267	331.104	0.00519722	6622.07	0.010891
66.89	0.00119644	66.89	0.00318556	133.779	0.00488056	100.334	0.000877222	100.334	0.00295667	334.448	0.00476522	6688.96	0.010815
67.559	0.00101144	67.559	0.00328256	135.117	0.00497556	101.338	0.00107822	101.338	0.00348467	337.793	0.00494222	6755.85	0.009933
68.227	0.00100244	68.227	0.00303656	136.455	0.00448756	102.341	0.00104422	102.341	0.00375067	341.137	0.00437722	6822.74	0.009706
68.896	0.000943444	68.896	0.00310356	137.793	0.00459456	103.344	0.000864222	103.344	0.00350967	344.482	0.00449122	6889.63	0.009927
69.565	0.000917444	69.565	0.00272556	139.13	0.00472256	104.348	0.00102622	104.348	0.00341367	347.826	0.00459522	6956.52	0.010311
70.234	0.000821444	70.234	0.00293256	140.468	0.00449556	105.351	0.000893222	105.351	0.00366867	351.171	0.00411122	7023.41	0.010105
70.903	0.000914444	70.903	0.00278856	141.806	0.00448956	106.355	0.000682222	106.355	0.00343067	354.515	0.00434522	7090.3	0.009891
71.572	0.00107944	71.572	0.00282356	143.144	0.00455956	107.358	0.000956222	107.358	0.00352367	357.86	0.00424222	7157.19	0.010494
72.241	0.000858444	72.241	0.00254156	144.482	0.00432856	108.361	0.000813222	108.361	0.00300267	361.204	0.00458322	7224.08	0.009434
72.91	0.000845444	72.91	0.00266656	145.819	0.00437456	109.365	0.000967222	109.365	0.00340467	364.548	0.00444422	7290.97	0.009954
73.579	0.000900444	73.579	0.00289756	147.157	0.00432256	110.368	0.000892222	110.368	0.00313967	367.893	0.00371122	7357.86	0.009485
74.247	0.000878444	74.247	0.00256956	148.495	0.00441056	111.371	0.000943222	111.371	0.00341667	371.237	0.00410122	7424.75	0.009897
74.916	0.000803444	74.916	0.00261656	149.833	0.00474956	112.375	0.000936222	112.375	0.00302867	374.582	0.00413822	7491.64	0.009094
75.585	0.000970444	75.585	0.00264656	151.171	0.00443556	113.378	0.000878222	113.378	0.00298367	377.926	0.00369322	7558.53	0.009601
76.254	0.000857444	76.254	0.00267756	152.508	0.00438456	114.381	0.000859222	114.381	0.00322567	381.271	0.00384522	7625.42	0.009595
76.923	0.000883444	76.923	0.00232756	153.846	0.00360356	115.385	0.000875222	115.385	0.00296967	384.615	0.00369222	7692.31	0.009144
77.592	0.00101544	77.592	0.00280556	155.184	0.00382956	116.388	0.000846222	116.388	0.00283667	387.96	0.00362222	7759.2	0.009612
78.261	0.000940444	78.261	0.00251156	156.522	0.00469256	117.391	0.000877222	117.391	0.00337767	391.304	0.00372922	7826.09	0.009224
78.93	0.000788444	78.93	0.00253956	157.86	0.00426456	118.395	0.000913222	118.395	0.00315567	394.649	0.00421422	7892.98	0.009167
79.599	0.000691444	79.599	0.00229956	159.197	0.00464156	119.398	0.000750222	119.398	0.00298467	397.993	0.00408422	7959.87	0.009127
80.268	0.000740444	80.268	0.00245656	160.535	0.00450856	120.401	0.000973222	120.401	0.00291667	401.338	0.00373922	8026.76	0.009111
80.936	0.00106044	80.936	0.00254556	161.873	0.00345556	121.405	0.000785222	121.405	0.00283967	404.682	0.00344522	8093.65	0.009375
81.605	0.000940444	81.605	0.00248556	163.211	0.00399856	122.408	0.000916222	122.408	0.00277067	408.027	0.00323622	8160.54	0.009884
82.274	0.000739444	82.274	0.00240756	164.548	0.00357256	123.411	0.000978222	123.411	0.00283767	411.371	0.00339922	8227.42	0.01005
82.943	0.000769444	82.943	0.00249656	165.886	0.00388556	124.415	0.000794222	124.415	0.00288767	414.716	0.00335922	8294.31	0.009039
83.612	0.000728444	83.612	0.00240156	167.224	0.00368156	125.418	0.000713222	125.418	0.00276467	418.06	0.00365122	8361.2	0.009423
84.281	0.000632444	84.281	0.00236256	168.562	0.00386256	126.421	0.000748222	126.421	0.00264867	421.405	0.00353322	8428.09	0.00925
84.95	0.000797444	84.95	0.00253456	169.9	0.00377156	127.425	0.000876222	127.425	0.00280967	424.749	0.00367722	8494.98	0.009277
85.619	0.000701444	85.619	0.00223456	171.237	0.00385756	128.428	0.000843222	128.428	0.00262267	428.094	0.00347522	8561.87	0.009749
86.288	0.000672444	86.288	0.00219856	172.575	0.00390756	129.431	0.000759222	129.431	0.00234567	431.438	0.00357822	8628.76	0.009011
86.957	0.000866444	86.957	0.00225456	173.913	0.00373556	130.435	0.000799222	130.435	0.00283767	434.783	0.00362422	8695.65	0.009322
87.625	0.000741444	87.625	0.00233556	175.251	0.00354456	131.438	0.000735222	131.438	0.00271367	438.127	0.00363222	8762.54	0.008677
88.294	0.000821444	88.294	0.00216156	176.589	0.00360756	132.441	0.000740222	132.441	0.00279367	441.472	0.00326122	8829.43	0.00823
88.963	0.000799444	88.963	0.00216456	177.926	0.00381256	133.445	0.000632222	133.445	0.00300967	444.816	0.00378822	8896.32	0.009305
89.632	0.000780444	89.632	0.00202656	179.264	0.00348756	134.448	0.000765222	134.448	0.00253667	448.161	0.00317822	8963.21	0.008676
90.301	0.000754444	90.301	0.00215856	180.602	0.00413856	135.452	0.000805222	135.452	0.00280367	451.505	0.00316422	9030.1	0.009574
90.97	0.000621444	90.97	0.00229556	181.94	0.00374856	136.455	0.000660222	136.455	0.00226767	454.849	0.00310622	9096.99	0.010146
91.639	0.000829444	91.639	0.00211356	183.278	0.00360956	137.458	0.000792222	137.458	0.00278867	458.194	0.00337122	9163.88	0.008674
92.308	0.000770444	92.308	0.00212456	184.615	0.00354356	138.462	0.000797222	138.462	0.00246867	461.538	0.00306822	9230.77	0.009171
92.977	0.000671444	92.977	0.00202256	185.953	0.00335756	139.465	0.000765222	139.465	0.00251067	464.883	0.00324222	9297.66	0.00883
93.645	0.000812444	93.645	0.00211956	187.291	0.00329356	140.468	0.000756222	140.468	0.00225267	468.227	0.00336222	9364.55	0.008713
94.314	0.000794444	94.314	0.00176856	188.629	0.00336756	141.472	0.000946222	141.472	0.00266967	471.572	0.00292422	9431.44	0.008893
94.983	0.000825444	94.983	0.00212356	189.967	0.00347256	142.475	0.000722222	142.475	0.00262267	474.916	0.00282322	9498.33	0.008792
95.652	0.000601444	95.652	0.00181756	191.304	0.00344156	143.478	0.000819222	143.478	0.00226767	478.261	0.00313922	9565.22	0.008095
96.321	0.000701444	96.321	0.00190356	192.642	0.00319756	144.482	0.000780222	144.482	0.00236367	481.605	0.00315722	9632.11	0.008425
96.99	0.000665444	96.99	0.00200856	193.98	0.00314556	145.485	0.000702222	145.485	0.00243567	484.95	0.00282322	9699	0.008173
97.659	0.000684444	97.659	0.00196756	195.318	0.00327556	146.488	0.000707222	146.488	0.00232567	488.294	0.00277822	9765.89	0.008875
98.328	0.000613444	98.328	0.00192756	196.656	0.00340856	147.492	0.000716222	147.492	0.00241767	491.639	0.00296522	9832.78	0.007909
98.997	0.000803444	98.997	0.00197856	197.993	0.00324456	148.495	0.000595222	148.495	0.00228567	494.983	0.00267322	9899.67	0.008321
99.666	0.000864444	99.666	0.00181756	199.331	0.00318456	149.498	0.000520222	149.498	0.00258867	498.328	0.00279622	9966.55	0.008713
100.334	0.000779444	100.334	0.00177456	200.669	0.00300856	150.502	0.000672222	150.502	0.00227467	501.672	0.00297122	10033.4	0.009052
101.003	0.000724444	101.003	0.00180856	202.007	0.00344356	151.505	0.000762222	151.505	0.00223067	505.017	0.00294722	10100.3	0.009312
101.672	0.000726444	101.672	0.00176456	203.344	0.00328956	152.508	0.000876222	152.508	0.00250767	508.361	0.00276822	10167.2	0.008064
102.341	0.000722444	102.341	0.00176756	204.682	0.00309856	153.512	0.000748222	153.512	0.00241267	511.706	0.00273122	10234.1	0.007999
103.01	0.000555444	103.01	0.00159656	206.02	0.00313156	154.515	0.000876222	154.515	0.00216767	515.05	0.00297322	10301	0.008095
103.679	0.000789444	103.679	0.00185256	207.358	0.00289356	155.518	0.000852222	155.518	0.00224267	518.395	0.00304922	10367.9	0.008442
104.348	0.000604444	104.348	0.00185256	208.696	0.00337456	156.522	0.000660222	156.522	0.00190367	521.739	0.00271722	10434.8	0.008421
105.017	0.000587444	105.017	0.00174156	210.033	0.00317456	157.525	0.000605222	157.525	0.00220067	525.084	0.00289122	10501.7	0.007896
105.686	0.000705444	105.686	0.00182856	211.371	0.00296256	158.528	0.000724222	158.528	0.00219967	528.428	0.00278922	10568.6	0.008259
106.355	0.000649444	106.355	0.00187456	212.709	0.00315156	159.532	0.000735222	159.532	0.00209467	531.773	0.00301222	10635.5	0.008633
107.023	0.000708444	107.023	0.00177556	214.047	0.00302256	160.535	0.000676222	160.535	0.00218467	535.117	0.00280522	10702.3	0.007826
107.692	0.000636444	107.692	0.00172356	215.385	0.00301856	161.538	0.000795222	161.538	0.00221267	538.462	0.00263122	10769.2	0.008047
108.361	0.000752444	108.361	0.00154456	216.722	0.00298156	162.542	0.000647222	162.542	0.00204467	541.806	0.00255622	10836.1	0.008131
109.03	0.000683444	109.03	0.00187456	218.06	0.00279256	163.545	0.000682222	163.545	0.00196067	545.151	0.00279622	10903	0.007897
109.699	0.000756444	109.699	0.00169756	219.398	0.00308156	164.548	0.000644222	164.548	0.00216867	548.495	0.00272722	10969.9	0.007592
110.368	0.000668444	110.368	0.00164656	220.736	0.00271556	165.552	0.000626222	165.552	0.00210667	551.839	0.00242122	11036.8	0.008381
111.037	0.000661444	111.037	0.00164756	222.074	0.00263556	166.555	0.000697222	166.555	0.00212067	555.184	0.00229722	11103.7	0.007581
111.706	0.000707444	111.706	0.00161356	223.411	0.00285956	167.559	0.000735222	167.559	0.00178767	558.528	0.00239322	11170.6	0.008187
112.375	0.000584444	112.375	0.00180956	224.749	0.00287856	168.562	0.000569222	168.562	0.00214767	561.873	0.00283622	11237.5	0.007937
113.043	0.000571444	113.043	0.00172556	226.087	0.00292556	169.565	0.000566222	169.565	0.00201067	565.217	0.00237622	11304.3	0.008214
113.712	0.000549444	113.712	0.00168356	227.425	0.00307856	170.569	0.000642222	170.569	0.00191567	568.562	0.00221422	11371.2	0.007549
114.381	0.000681444	114.381	0.00153256	228.763	0.00300556	171.572	0.000685222	171.572	0.00175567	571.906	0.00282122	11438.1	0.00688
115.05	0.000576444	115.05	0.00144656	230.1	0.00302456	172.575	0.000598222	172.575	0.00176967	575.251	0.00265522	11505	0.008059
115.719	0.000574444	115.719	0.00144156	231.438	0.00238756	173.579	0.000740222	173.579	0.00202267	578.595	0.00247822	11571.9	0.00752
116.388	0.000622444	116.388	0.00167956	232.776	0.00253256	174.582	0.000630222	174.582	0.00179067	581.94	0.00291122	11638.8	0.006983
117.057	0.000634444	117.057	0.00152556	234.114	0.00280556	175.585	0.000658222	175.585	0.00202767	585.284	0.00220222	11705.7	0.007412
117.726	0.000521444	117.726	0.00121456	235.452	0.00301756	176.589	0.000632222	176.589	0.00190867	588.629	0.00245122	11772.6	0.007994
118.395	0.000654444	118.395	0.00157756	236.789	0.00275256	177.592	0.000690222	177.592	0.00185967	591.973	0.00189922	11839.5	0.007636
119.064	0.000704444	119.064	0.00175456	238.127	0.00264856	178.595	0.000606222	178.595	0.00158667	595.318	0.00181622	11906.4	0.008112
119.732	0.000484444	119.732	0.00147656	239.465	0.00279856	179.599	0.000712222	179.599	0.00178367	598.662	0.00252522	11973.2	0.0074
120.401	0.000773444	120.401	0.00158256	240.803	0.00262456	180.602	0.000530222	180.602	0.00181867	602.007	0.00214822	12040.1	0.00793
121.07	0.000464444	121.07	0.00146456	242.14	0.00273056	181.605	0.000588222	181.605	0.00192267	605.351	0.00218922	12107	0.008047
121.739	0.000573444	121.739	0.00139156	243.478	0.00240156	182.609	0.000708222	182.609	0.00203067	608.696	0.00234522	12173.9	0.007473
122.408	0.000520444	122.408	0.00142556	244.816	0.00267556	183.612	0.000663222	183.612	0.00160567	612.04	0.00224922	12240.8	0.008012
123.077	0.000573444	123.077	0.00157856	246.154	0.00259156	184.615	0.000540222	184.615	0.00165067	615.385	0.00208822	12307.7	0.007377
123.746	0.000629444	123.746	0.00140656	247.492	0.00279256	185.619	0.000665222	185.619	0.00177067	618.729	0.00240922	12374.6	0.007226
124.415	0.000594444	124.415	0.00127356	248.829	0.00231856	186.622	0.000673222	186.622	0.00171667	622.074	0.00232122	12441.5	0.007175
125.084	0.000576444	125.084	0.00138856	250.167	0.00257956	187.625	0.000654222	187.625	0.00180867	625.418	0.00211722	12508.4	0.006886
125.753	0.000662444	125.753	0.00127756	251.505	0.00258456	188.629	0.000637222	188.629	0.00183667	628.763	0.00236822	12575.3	0.007262
126.421	0.000616444	126.421	0.00127956	252.843	0.00271356	189.632	0.000682222	189.632	0.00180967	632.107	0.00202622	12642.1	0.007332
127.09	0.000650444	127.09	0.00143556	254.181	0.00216056	190.635	0.000656222	190.635	0.00179467	635.452	0.00192422	12709	0.006545
127.759	0.000557444	127.759	0.00141356	255.518	0.00236156	191.639	0.000658222	191.639	0.00190667	638.796	0.00215922	12775.9	0.007552
128.428	0.000655444	128.428	0.00135456	256.856	0.00223256	192.642	0.000484222	192.642	0.00169767	642.14	0.00214522	12842.8	0.007272
129.097	0.000657444	129.097	0.00138556	258.194	0.00235756	193.645	0.000706222	193.645	0.00136867	645.485	0.00222122	12909.7	0.007189
129.766	0.000664444	129.766	0.00138856	259.532	0.00233056	194.649	0.000692222	194.649	0.00167667	648.829	0.00201222	12976.6	0.0077
130.435	0.000480444	130.435	0.00124756	260.87	0.00252556	195.652	0.000619222	195.652	0.00155767	652.174	0.00205222	13043.5	0.007189
131.104	0.000630444	131.104	0.00142456	262.207	0.00251256	196.656	0.000558222	196.656	0.00143367	655.518	0.00197422	13110.4	0.006835
131.773	0.000468444	131.773	0.00117856	263.545	0.00225256	197.659	0.000675222	197.659	0.00176567	658.863	0.00207622	13177.3	0.007557
132.441	0.000599444	132.441	0.00145756	264.883	0.00244256	198.662	0.000598222	198.662	0.00160967	662.207	0.00201722	13244.1	0.007252
133.11	0.000532444	133.11	0.00121756	266.221	0.00224756	199.666	0.000534222	199.666	0.00159867	665.552	0.00185222	13311	0.006886
133.779	0.000702444	133.779	0.00134556	267.559	0.00231056	200.669	0.000709222	200.669	0.00164467	668.896	0.00213622	13377.9	0.006961
134.448	0.000653444	134.448	0.00139856	268.896	0.00232856	201.672	0.000823222	201.672	0.00165767	672.241	0.00184522	13444.8	0.007132
135.117	0.000811444	135.117	0.00140956	270.234	0.00206556	202.676	0.000737222	202.676	0.00142867	675.585	0.00177522	13511.7	0.007532
135.786	0.000555444	135.786	0.00142856	271.572	0.00225056	203.679	0.000558222	203.679	0.00170467	678.93	0.00197222	13578.6	0.006903
136.455	0.000655444	136.455	0.00128356	272.91	0.00208356	204.682	0.000812222	204.682	0.00155367	682.274	0.00185722	13645.5	0.006605
137.124	0.000506444	137.124	0.00130556	274.247	0.00197356	205.686	0.000607222	205.686	0.00147067	685.619	0.00170222	13712.4	0.007054
137.793	0.000469444	137.793	0.00129556	275.585	0.00229756	206.689	0.000542222	206.689	0.00152767	688.963	0.00205222	13779.3	0.00714
138.462	0.000691444	138.462	0.00133656	276.923	0.00208856	207.692	0.000695222	207.692	0.00156667	692.308	0.00195322	13846.2	0.006701
139.13	0.000558444	139.13	0.00119656	278.261	0.00194756	208.696	0.000613222	208.696	0.00155467	695.652	0.00185522	13913	0.00647
139.799	0.000545444	139.799	0.00107156	279.599	0.00234156	209.699	0.000533222	209.699	0.00149967	698.997	0.00185222	13979.9	0.006897
140.468	0.000639444	140.468	0.00118156	280.936	0.00212556	210.702	0.000609222	210.702	0.00152367	702.341	0.00186722	14046.8	0.006735
141.137	0.000503444	141.137	0.00118656	282.274	0.00201956	211.706	0.000726222	211.706	0.00151467	705.686	0.00169122	14113.7	0.006387
141.806	0.000578444	141.806	0.00126756	283.612	0.00215956	212.709	0.000580222	212.709	0.00140467	709.03	0.00154722	14180.6	0.006896
142.475	0.000498444	142.475	0.00118756	284.95	0.00208856	213.712	0.000744222	213.712	0.00138467	712.375	0.00168422	14247.5	0.006947
143.144	0.000758444	143.144	0.00103256	286.288	0.00237856	214.716	0.000529222	214.716	0.00136067	715.719	0.00195322	14314.4	0.006713
143.813	0.000527444	143.813	0.00133156	287.625	0.00224056	215.719	0.000619222	215.719	0.00152267	719.064	0.00194522	14381.3	0.006401
144.482	0.000638444	144.482	0.00108156	288.963	0.00197156	216.722	0.000625222	216.722	0.00120267	722.408	0.00177722	14448.2	0.006924
145.151	0.000449444	145.151	0.00122456	290.301	0.00215756	217.726	0.000649222	217.726	0.00148867	725.753	0.00177622	14515	0.006493
145.819	0.000617444	145.819	0.00127956	291.639	0.00186956	218.729	0.000790222	218.729	0.00152967	729.097	0.00181322	14581.9	0.006655
146.488	0.000558444	146.488	0.00118556	292.977	0.00203556	219.732	0.000697222	219.732	0.00154267	732.441	0.00185322	14648.8	0.006734
147.157	0.000525444	147.157	0.00126656	294.314	0.00191356	220.736	0.000653222	220.736	0.00132467	735.786	0.00158522	14715.7	0.006855
147.826	0.000602444	147.826	0.00111556	295.652	0.00218956	221.739	0.000674222	221.739	0.00151667	739.13	0.00171122	14782.6	0.006622
148.495	0.000587444	148.495	0.00100556	296.99	0.00201056	222.742	0.000633222	222.742	0.00145067	742.475	0.00195922	14849.5	0.005666
149.164	0.000656444	149.164	0.00120956	298.328	0.00189456	223.746	0.000576222	223.746	0.00153967	745.819	0.00167322	14916.4	0.006716
149.833	0.000575444	149.833	0.00111856	299.666	0.00209256	224.749	0.000643222	224.749	0.00133467	749.164	0.00164322	14983.3	0.00623
150.502	0.000587444	150.502	0.00118756	301.003	0.00206756	225.753	0.000493222	225.753	0.00137067	752.508	0.00172922	15050.2	0.00635
151.171	0.000461444	151.171	0.00130956	302.341	0.00227556	226.756	0.000653222	226.756	0.00144867	755.853	0.00158122	15117.1	0.0064
151.839	0.000644444	151.839	0.00113556	303.679	0.00201356	227.759	0.000615222	227.759	0.00158567	759.197	0.00140322	15183.9	0.006794
152.508	0.000517444	152.508	0.00111856	305.017	0.00204556	228.763	0.000787222	228.763	0.00119067	762.542	0.00167422	15250.8	0.00549
153.177	0.000533444	153.177	0.00108456	306.355	0.00208256	229.766	0.000660222	229.766	0.00128067	765.886	0.00166122	15317.7	0.006111
153.846	0.000661444	153.846	0.00102756	307.692	0.00202856	230.769	0.000629222	230.769	0.00132867	769.231	0.00173622	15384.6	0.00618
154.515	0.000482444	154.515	0.00122856	309.03	0.00198156	231.773	0.000650222	231.773	0.00132367	772.575	0.00163422	15451.5	0.006352
155.184	0.000534444	155.184	0.00112456	310.368	0.00199856	232.776	0.000590222	232.776	0.00133767	775.92	0.00167222	15518.4	0.006961
155.853	0.000654444	155.853	0.00124156	311.706	0.00208956	233.779	0.000724222	233.779	0.00134367	779.264	0.00150222	15585.3	0.006226
156.522	0.000540444	156.522	0.000932556	313.043	0.00177056	234.783	0.000648222	234.783	0.00118767	782.609	0.00150722	15652.2	0.005971
157.191	0.000507444	157.191	0.00114456	314.381	0.00154556	235.786	0.000563222	235.786	0.00133767	785.953	0.00141422	15719.1	0.006146
157.86	0.000611444	157.86	0.00126256	315.719	0.00192156	236.789	0.000684222	236.789	0.00134467	789.298	0.00157822	15786	0.006004
158.528	0.000534444	158.528	0.00102656	317.057	0.00194056	237.793	0.000545222	237.793	0.00123567	792.642	0.00150422	15852.8	0.005616
159.197	0.000529444	159.197	0.00101456	318.395	0.00175356	238.796	0.000586222	238.796	0.00147667	795.987	0.00155822	15919.7	0.006076
159.866	0.000701444	159.866	0.000819556	319.732	0.00186556	239.799	0.000587222	239.799	0.00127667	799.331	0.00168522	15986.6	0.005847
160.535	0.000535444	160.535	0.00117156	321.07	0.00163756	240.803	0.000559222	240.803	0.00144667	802.676	0.00158522	16053.5	0.006275
161.204	0.000607444	161.204	0.00107156	322.408	0.00191556	241.806	0.000614222	241.806	0.00113267	806.02	0.00149822	16120.4	0.006205
161.873	0.000556444	161.873	0.00100856	323.746	0.00187856	242.809	0.000580222	242.809	0.00153767	809.365	0.00136322	16187.3	0.006762
162.542	0.000637444	162.542	0.00101756	325.084	0.00165556	243.813	0.000548222	243.813	0.00110067	812.709	0.00144722	16254.2	0.006165
163.211	0.000647444	163.211	0.000902556	326.421	0.00184156	244.816	0.000519222	244.816	0.00118867	816.054	0.00145722	16321.1	0.006029
163.88	0.000559444	163.88	0.00108956	327.759	0.00167156	245.819	0.000675222	245.819	0.00136267	819.398	0.00159122	16388	0.00635
164.548	0.000474444	164.548	0.000998556	329.097	0.00188156	246.823	0.000603222	246.823	0.00118567	822.742	0.00151522	16454.8	0.005499
165.217	0.000588444	165.217	0.00103956	330.435	0.00180056	247.826	0.000610222	247.826	0.00130667	826.087	0.00146122	16521.7	0.005717
165.886	0.000640444	165.886	0.00108256	331.773	0.00164556	248.829	0.000595222	248.829	0.00110867	829.431	0.00142122	16588.6	0.006327
166.555	0.000459444	166.555	0.00111956	333.11	0.00153356	249.833	0.000595222	249.833	0.00125267	832.776	0.00115322	16655.5	0.006259
167.224	0.000536444	167.224	0.00114456	334.448	0.00151856	250.836	0.000518222	250.836	0.00114267	836.12	0.00140622	16722.4	0.00566
167.893	0.000717444	167.893	0.000984556	335.786	0.00159956	251.839	0.000586222	251.839	0.00113367	839.465	0.00127922	16789.3	0.005475
168.562	0.000570444	168.562	0.000866556	337.124	0.00174956	252.843	0.000662222	252.843	0.00121767	842.809	0.00126722	16856.2	0.006045
169.231	0.000478444	169.231	0.00102856	338.462	0.00164156	253.846	0.000428222	253.846	0.00104267	846.154	0.00136222	16923.1	0.005963
169.9	0.000616444	169.9	0.000889556	339.799	0.00165456	254.849	0.000612222	254.849	0.00113067	849.498	0.00148722	16990	0.006652
170.569	0.000560444	170.569	0.00111656	341.137	0.00187956	255.853	0.000754222	255.853	0.00119367	852.843	0.00148922	17056.9	0.0061
171.237	0.000519444	171.237	0.000859556	342.475	0.00184256	256.856	0.000604222	256.856	0.00110367	856.187	0.00120922	17123.7	0.0057
171.906	0.000500444	171.906	0.000949556	343.813	0.00182156	257.86	0.000685222	257.86	0.00115867	859.532	0.00135922	17190.6	0.00589
172.575	0.000634444	172.575	0.00100256	345.151	0.00150256	258.863	0.000628222	258.863	0.00124767	862.876	0.00133722	17257.5	0.005779
173.244	0.000482444	173.244	0.000951556	346.488	0.00160356	259.866	0.000732222	259.866	0.000998667	866.221	0.00128322	17324.4	0.00598
173.913	0.000442444	173.913	0.00103756	347.826	0.00177556	260.87	0.000537222	260.87	0.00104467	869.565	0.00144922	17391.3	0.006265
174.582	0.000583444	174.582	0.000954556	349.164	0.00174756	261.873	0.000594222	261.873	0.00110667	872.91	0.00132722	17458.2	0.005757
175.251	0.000517444	175.251	0.000883556	350.502	0.00145056	262.876	0.000739222	262.876	0.00111567	876.254	0.00122722	17525.1	0.005545
175.92	0.000566444	175.92	0.000956556	351.839	0.00173856	263.88	0.000629222	263.88	0.00121467	879.599	0.00132322	17592	0.005535
176.589	0.000529444	176.589	0.000914556	353.177	0.00187256	264.883	0.000539222	264.883	0.00117467	882.943	0.00131122	17658.9	0.005506
177.258	0.000533444	177.258	0.000911556	354.515	0.00131456	265.886	0.000637222	265.886	0.00123467	886.288	0.00147922	17725.8	0.005963
177.926	0.000586444	177.926	0.000945556	355.853	0.00150256	266.89	0.000696222	266.89	0.00101467	889.632	0.00139822	17792.6	0.005874
178.595	0.000473444	178.595	0.000865556	357.191	0.00152956	267.893	0.000582222	267.893	0.00108967	892.977	0.00113922	17859.5	0.005615
179.264	0.000547444	179.264	0.000892556	358.528	0.00170956	268.896	0.000540222	268.896	0.00110567	896.321	0.00118222	17926.4	0.005683
179.933	0.000564444	179.933	0.000895556	359.866	0.00166756	269.9	0.000568222	269.9	0.00113967	899.666	0.00143122	17993.3	0.005967
180.602	0.000537444	180.602	0.00102656	361.204	0.00144356	270.903	0.000656222	270.903	0.00118367	903.01	0.00125922	18060.2	0.005727
181.271	0.000572444	181.271	0.000842556	362.542	0.00144356	271.906	0.000667222	271.906	0.00106267	906.355	0.00134122	18127.1	0.005407
181.94	0.000627444	181.94	0.00100956	363.88	0.00150256	272.91	0.000658222	272.91	0.00114767	909.699	0.00120722	18194	0.005495
182.609	0.000572444	182.609	0.000788556	365.217	0.00152156	273.913	0.000510222	273.913	0.00115467	913.043	0.00123922	18260.9	0.005351
183.278	0.000673444	183.278	0.000891556	366.555	0.00137956	274.916	0.000588222	274.916	0.00121267	916.388	0.00113922	18327.8	0.00548
183.946	0.000467444	183.946	0.000815556	367.893	0.00143456	275.92	0.000612222	275.92	0.00114667	919.732	0.00120122	18394.6	0.005285
184.615	0.000547444	184.615	0.000826556	369.231	0.00130956	276.923	0.000496222	276.923	0.00110367	923.077	0.000989222	18461.5	0.005247
185.284	0.000616444	185.284	0.00100956	370.569	0.00150856	277.926	0.000545222	277.926	0.00108467	926.421	0.00119222	18528.4	0.004904
185.953	0.000664444	185.953	0.000993556	371.906	0.00158956	278.93	0.000676222	278.93	0.00118367	929.766	0.00132722	18595.3	0.0055
186.622	0.000550444	186.622	0.000871556	373.244	0.00134156	279.933	0.000618222	279.933	0.00114967	933.11	0.00128222	18662.2	0.005043
187.291	0.000542444	187.291	0.000931556	374.582	0.00144956	280.936	0.000566222	280.936	0.00105267	936.455	0.00117122	18729.1	0.004994
187.96	0.000590444	187.96	0.000938556	375.92	0.00137556	281.94	0.000533222	281.94	0.000917667	939.799	0.00146422	18796	0.005333
188.629	0.000606444	188.629	0.000847556	377.258	0.00168356	282.943	0.000643222	282.943	0.00103767	943.144	0.00126122	18862.9	0.004922
189.298	0.000650444	189.298	0.000922556	378.595	0.00143756	283.946	0.000586222	283.946	0.00111767	946.488	0.00119222	18929.8	0.005501
189.967	0.000635444	189.967	0.000771556	379.933	0.00160556	284.95	0.000609222	284.95	0.000856667	949.833	0.00115522	18996.7	0.005263
190.635	0.000574444	190.635	0.000851556	381.271	0.00156856	285.953	0.000579222	285.953	0.00119767	953.177	0.00112822	19063.5	0.005583
191.304	0.000592444	191.304	0.00101756	382.609	0.00127856	286.957	0.000629222	286.957	0.00109267	956.522	0.00106922	19130.4	0.004781
191.973	0.000498444	191.973	0.000742556	383.946	0.00135056	287.96	0.000580222	287.96	0.000993667	959.866	0.00112322	19197.3	0.005319
192.642	0.000585444	192.642	0.000765556	385.284	0.00131056	288.963	0.000689222	288.963	0.000999667	963.211	0.00143822	19264.2	0.005245
193.311	0.000486444	193.311	0.000902556	386.622	0.00147756	289.967	0.000672222	289.967	0.00105267	966.555	0.00114822	19331.1	0.004115
193.98	0.000472444	193.98	0.000854556	387.96	0.00135856	290.97	0.000609222	290.97	0.00118767	969.9	0.00114822	19398	0.004885
194.649	0.000668444	194.649	0.00107556	389.298	0.00147956	291.973	0.000663222	291.973	0.000946667	973.244	0.00128122	19464.9	0.005059
195.318	0.000613444	195.318	0.000724556	390.635	0.00132256	292.977	0.000608222	292.977	0.000905667	976.589	0.00131422	19531.8	0.005237
195.987	0.000563444	195.987	0.000767556	391.973	0.00145256	293.98	0.000620222	293.98	0.000989667	979.933	0.00108722	19598.7	0.005153
196.656	0.000490444	196.656	0.000768556	393.311	0.00151056	294.983	0.000700222	294.983	0.000932667	983.278	0.00123622	19665.6	0.005329
197.324	0.000457444	197.324	0.000797556	394.649	0.00127356	295.987	0.000578222	295.987	0.000796667	986.622	0.00144122	19732.4	0.004939
197.993	0.000553444	197.993	0.000772556	395.987	0.00148956	296.99	0.000514222	296.99	0.00110367	989.967	0.00118422	19799.3	0.004825
198.662	0.000516444	198.662	0.000818556	397.324	0.00123156	297.993	0.000660222	297.993	0.000846667	993.311	0.00132722	19866.2	0.005184
199.331	0.000570444	199.331	0.000681556	398.662	0.00145256	298.997	0.000528222	298.997	0.000958667	996.656	0.00140922	19933.1	0.004592
200	0.000517444	200	0.000658556	400	0.00162456	300	0.000595222	300	0.00105467	1000	0.00126122	20000	0.004645

## Sheet: Dataset 5
HgBr 17092021 8	HgBr 17092021 8	HgBr 17092021 9	HgBr 17092021 9	HgBr 17092021 10	HgBr 17092021 10	HgBr 17092021 11	HgBr 17092021 11	HgBr 17092021 12	HgBr 17092021 12	HgBr 17092021 13	HgBr 17092021 13	HgBr 17092021 14	HgBr 17092021 14	HgBr 17092021 15	HgBr 17092021 15	HgBr 17092021 16	HgBr 17092021 16	HgBr 17092021 17	HgBr 17092021 17
[O3]0/molecule cm-3	0	[O3]0/molecule cm-3	465016000000000	[O3]0/molecule cm-3	462532000000000	[O3]0/molecule cm-3	462532000000000	[O3]0/molecule cm-3	462532000000000	[O3]0/molecule cm-3	462532000000000	[O3]0/molecule cm-3	462532000000000	[O3]0/molecule cm-3	462532000000000	[O3]0/molecule cm-3	447753000000000	[O3]0/molecule cm-3	457581000000000
pf	0	pf	0.434946	pf	0.544776	pf	0.219131	pf	0.132017	pf	0.110442	pf	0.100304	pf	0.506396	pf	0.354355	pf	0.141927
t/us	HgBr LIF Signal	t/us	HgBr LIF Signal	t/us	HgBr LIF Signal	t/us	HgBr LIF Signal	t/us	HgBr LIF Signal	t/us	HgBr LIF Signal	t/us	HgBr LIF Signal	t/us	HgBr LIF Signal	t/us	HgBr LIF Signal	t/us	HgBr LIF Signal
-2700	4.74444e-05	-150	-5.77778e-06	-150	3.63333e-05	-150	1.77778e-05	-150	-4.98889e-05	-150	4.22222e-06	-150	3.33333e-05	-150	-3.82222e-05	-150	3.01111e-05	-90	-1.33333e-05
-2400	2.94444e-05	-140	2.22222e-07	-140	2.33333e-05	-140	-3.62222e-05	-140	6.11111e-05	-140	-1.17778e-05	-140	7.33333e-06	-140	-5.62222e-05	-140	-2.88889e-05	-80	-4.33333e-06
-2100	1.34444e-05	-130	-6.77778e-06	-130	2.43333e-05	-130	-2.22222e-06	-130	9.11111e-06	-130	-2.77778e-05	-130	-2.66667e-06	-130	8.77778e-06	-130	1.11111e-05	-70	-2.33333e-06
-1800	-1.75556e-05	-120	3.22222e-06	-120	-6.66667e-06	-120	3.17778e-05	-120	-1.98889e-05	-120	-2.37778e-05	-120	-3.66667e-06	-120	3.67778e-05	-120	1.31111e-05	-60	1.66667e-05
-1500	-6.75556e-05	-110	-1.07778e-05	-110	-7.56667e-05	-110	-2.22222e-07	-110	-4.78889e-05	-110	1.22222e-06	-110	-5.66667e-06	-110	-1.62222e-05	-110	3.11111e-06	-50	-1.33333e-05
-1200	-3.55556e-06	-100	-1.77778e-06	-100	3.23333e-05	-100	-2.72222e-05	-100	2.11111e-05	-100	2.62222e-05	-100	-5.66667e-06	-100	3.37778e-05	-100	1.51111e-05	-40	3.66667e-06
-900	-5.55556e-06	-90	4.32222e-05	-90	-6.66667e-06	-90	2.77778e-06	-90	1.11111e-07	-90	-8.77778e-06	-90	-6.06667e-05	-90	3.87778e-05	-90	-2.88889e-05	-30	-5.33333e-06
-600	-3.35556e-05	-80	-2.47778e-05	-80	-5.66667e-06	-80	-4.22222e-06	-80	3.71111e-05	-80	2.52222e-05	-80	1.73333e-05	-80	-1.22222e-06	-80	-8.88889e-06	-20	9.66667e-06
-300	3.74444e-05	-70	3.22222e-06	-70	-2.16667e-05	-70	1.77778e-05	-70	-1.08889e-05	-70	1.52222e-05	-70	2.03333e-05	-70	-6.22222e-06	-70	-5.88889e-06	-10	8.66667e-06
0	-0.000103556	-60	3.22222e-06	-60	-4.16667e-05	-60	3.77778e-06	-60	-1.88889e-06	-60	-7.17778e-05	-60	5.73333e-05	-60	-1.82222e-05	-60	-2.68889e-05	0	-1.93333e-05
150.754	0.0148	-50	2.02222e-05	-50	1.33333e-06	-50	-1.82222e-05	-50	8.11111e-06	-50	-4.47778e-05	-50	-3.56667e-05	-50	3.57778e-05	-50	-1.88889e-06	3.344	0.00445467
301.508	0.02426	-40	-3.97778e-05	-40	-5.96667e-05	-40	-3.22222e-06	-40	-2.78889e-05	-40	-1.57778e-05	-40	-3.26667e-05	-40	1.27778e-05	-40	-1.88889e-06	6.689	0.00637667
452.261	0.02409	-30	8.42222e-05	-30	4.33333e-06	-30	0.000108778	-30	8.11111e-06	-30	4.22222e-05	-30	-5.56667e-05	-30	-4.22222e-06	-30	-7.88889e-06	10.033	0.00584067
603.015	0.0233	-20	3.02222e-05	-20	2.53333e-05	-20	2.97778e-05	-20	2.91111e-05	-20	-2.77778e-06	-20	3.53333e-05	-20	-3.12222e-05	-20	4.11111e-06	13.378	0.00457367
753.769	0.02351	-10	2.02222e-05	-10	-1.66667e-06	-10	1.17778e-05	-10	-6.08889e-05	-10	-1.17778e-05	-10	4.63333e-05	-10	1.27778e-05	-10	1.11111e-05	16.722	0.00423367
904.523	0.02342	0	-6.77778e-06	0	-1.56667e-05	0	5.77778e-06	0	2.81111e-05	0	3.12222e-05	0	-2.96667e-05	0	-5.02222e-05	0	4.11111e-05	20.067	0.00394767
1055.28	0.02313	3.344	0.0143152	3.344	0.0184053	3.344	0.00867178	3.344	0.00522811	3.344	0.00370022	3.344	0.00242333	3.344	0.0297518	3.344	0.0177731	23.411	0.00344967
1206.03	0.02313	6.689	0.0211262	6.689	0.0252733	6.689	0.0116358	6.689	0.00684611	6.689	0.00549122	6.689	0.00370733	6.689	0.0406288	6.689	0.0259411	26.756	0.00277567
1356.78	0.02156	10.033	0.0186392	10.033	0.0241233	10.033	0.0107698	10.033	0.00609611	10.033	0.00450822	10.033	0.00297733	10.033	0.0358958	10.033	0.0249921	30.1	0.00287367
1507.54	0.02183	13.378	0.0168262	13.378	0.0228403	13.378	0.0103808	13.378	0.00554811	13.378	0.00406622	13.378	0.00261633	13.378	0.0314828	13.378	0.0227231	33.445	0.00240667
1658.29	0.02023	16.722	0.0148942	16.722	0.0207403	16.722	0.00867178	16.722	0.00467711	16.722	0.00348622	16.722	0.00259033	16.722	0.0298618	16.722	0.0205781	36.789	0.00279067
1809.05	0.0206	20.067	0.0139442	20.067	0.0192523	20.067	0.00803878	20.067	0.00431411	20.067	0.00306822	20.067	0.00201833	20.067	0.0284768	20.067	0.0192741	40.134	0.00193867
1959.8	0.02029	23.411	0.0134202	23.411	0.0169913	23.411	0.00750578	23.411	0.00403711	23.411	0.00286022	23.411	0.00181933	23.411	0.0277598	23.411	0.0164981	43.478	0.00192467
2110.55	0.01973	26.756	0.0128102	26.756	0.0169413	26.756	0.00692278	26.756	0.00343811	26.756	0.00257222	26.756	0.00180033	26.756	0.0250308	26.756	0.0165341	46.823	0.00202467
2261.31	0.01956	30.1	0.0112352	30.1	0.0160303	30.1	0.00633678	30.1	0.00309911	30.1	0.00252522	30.1	0.00128833	30.1	0.0222008	30.1	0.0152321	50.167	0.00164067
2412.06	0.01886	33.445	0.0106332	33.445	0.0141583	33.445	0.00581778	33.445	0.00302911	33.445	0.00211222	33.445	0.00122933	33.445	0.0226138	33.445	0.0143881	53.512	0.00145067
2562.81	0.01968	36.789	0.0104282	36.789	0.0147953	36.789	0.00531078	36.789	0.00289211	36.789	0.00187622	36.789	0.00113033	36.789	0.0208708	36.789	0.0131821	56.856	0.00141067
2713.57	0.01895	40.134	0.0100472	40.134	0.0139713	40.134	0.00464278	40.134	0.00225611	40.134	0.00165122	40.134	0.00124133	40.134	0.0203258	40.134	0.0126451	60.201	0.00121967
2864.32	0.01805	43.478	0.00978522	43.478	0.0131333	43.478	0.00528978	43.478	0.00238111	43.478	0.00149722	43.478	0.00100333	43.478	0.0194788	43.478	0.0118751	63.545	0.00120167
3015.07	0.01803	46.823	0.00909922	46.823	0.0114563	46.823	0.00497778	46.823	0.00235911	46.823	0.00146922	46.823	0.000859333	46.823	0.0188298	46.823	0.0118421	66.89	0.00134767
3165.83	0.01735	50.167	0.00880722	50.167	0.0114843	50.167	0.00408978	50.167	0.00218911	50.167	0.00154522	50.167	0.000663333	50.167	0.0177028	50.167	0.0116511	70.234	0.00132367
3316.58	0.01816	53.512	0.00849422	53.512	0.0117953	53.512	0.00431378	53.512	0.00201611	53.512	0.00124222	53.512	0.000817333	53.512	0.0164008	53.512	0.0102211	73.579	0.000956667
3467.34	0.01701	56.856	0.00812222	56.856	0.0107343	56.856	0.00399578	56.856	0.00172111	56.856	0.00106422	56.856	0.000611333	56.856	0.0167188	56.856	0.0103021	76.923	0.00109667
3618.09	0.01718	60.201	0.00770422	60.201	0.0106223	60.201	0.00404678	60.201	0.00173411	60.201	0.000988222	60.201	0.000576333	60.201	0.0156088	60.201	0.00969811	80.268	0.00100667
3768.84	0.01694	63.545	0.00736022	63.545	0.0101763	63.545	0.00393178	63.545	0.00167111	63.545	0.00124522	63.545	0.000563333	63.545	0.0153348	63.545	0.0101101	83.612	0.00104867
3919.6	0.01701	66.89	0.00745622	66.89	0.00995433	66.89	0.00382578	66.89	0.00154411	66.89	0.000977222	66.89	0.000359333	66.89	0.0150898	66.89	0.0102381	86.957	0.000929667
4070.35	0.01538	70.234	0.00698922	70.234	0.00923733	70.234	0.00334778	70.234	0.00171411	70.234	0.000862222	70.234	0.000439333	70.234	0.0136828	70.234	0.00923311	90.301	0.00106667
4221.11	0.01585	73.579	0.00694722	73.579	0.00895333	73.579	0.00355278	73.579	0.00156111	73.579	0.000977222	73.579	0.000321333	73.579	0.0132598	73.579	0.00918111	93.645	0.000929667
4371.86	0.01607	76.923	0.00638022	76.923	0.00889833	76.923	0.00411278	76.923	0.00142911	76.923	0.000856222	76.923	0.000446333	76.923	0.0139238	76.923	0.00879511	96.99	0.000948667
4522.61	0.0156	80.268	0.00619622	80.268	0.00815533	80.268	0.00318878	80.268	0.00138611	80.268	0.000692222	80.268	0.000433333	80.268	0.0133728	80.268	0.00865511	100.334	0.000943667
4673.37	0.01541	83.612	0.00623522	83.612	0.00853533	83.612	0.00329178	83.612	0.00132911	83.612	0.000805222	83.612	0.000398333	83.612	0.0129908	83.612	0.00870611	103.679	0.000785667
4824.12	0.01514	86.957	0.00613222	86.957	0.00812033	86.957	0.00314178	86.957	0.00116711	86.957	0.000835222	86.957	0.000400333	86.957	0.0127518	86.957	0.00844711	107.023	0.000853667
4974.87	0.0144	90.301	0.00598622	90.301	0.00819733	90.301	0.00320878	90.301	0.00129011	90.301	0.000901222	90.301	0.000356333	90.301	0.0124928	90.301	0.00767011	110.368	0.000859667
5125.63	0.01442	93.645	0.00604022	93.645	0.00788033	93.645	0.00313278	93.645	0.00135911	93.645	0.000932222	93.645	0.000341333	93.645	0.0120398	93.645	0.00806211	113.712	0.000900667
5276.38	0.01463	96.99	0.00545022	96.99	0.00695733	96.99	0.00269178	96.99	0.00131911	96.99	0.000678222	96.99	0.000326333	96.99	0.0113698	96.99	0.00718711	117.057	0.000875667
5427.14	0.01379	100.334	0.00563322	100.334	0.00745633	100.334	0.00314078	100.334	0.00125311	100.334	0.000659222	100.334	0.000360333	100.334	0.0105608	100.334	0.00742711	120.401	0.000889667
5577.89	0.01349	103.679	0.00555522	103.679	0.00706333	103.679	0.00321778	103.679	0.00106811	103.679	0.000800222	103.679	0.000264333	103.679	0.0106488	103.679	0.00752011	123.746	0.000857667
5728.64	0.01331	107.023	0.00540622	107.023	0.00655633	107.023	0.00279578	107.023	0.00129911	107.023	0.000626222	107.023	0.000358333	107.023	0.0107518	107.023	0.00754711	127.09	0.000747667
5879.4	0.01265	110.368	0.00535922	110.368	0.00625733	110.368	0.00282878	110.368	0.00124411	110.368	0.000589222	110.368	0.000350333	110.368	0.00982878	110.368	0.00700711	130.435	0.000753667
6030.15	0.0132	113.712	0.00504022	113.712	0.00681533	113.712	0.00306678	113.712	0.00127611	113.712	0.000675222	113.712	0.000349333	113.712	0.00990378	113.712	0.00718111	133.779	0.000707667
6180.9	0.01322	117.057	0.00540922	117.057	0.00667833	117.057	0.00303178	117.057	0.00115111	117.057	0.000722222	117.057	0.000306333	117.057	0.00962978	117.057	0.00687711	137.124	0.000915667
6331.66	0.01313	120.401	0.00505222	120.401	0.00625833	120.401	0.00295178	120.401	0.00127811	120.401	0.000639222	120.401	0.000387333	120.401	0.00971178	120.401	0.00706711	140.468	0.000732667
6482.41	0.01228	123.746	0.00492222	123.746	0.00591433	123.746	0.00277378	123.746	0.00131211	123.746	0.000646222	123.746	0.000254333	123.746	0.00926978	123.746	0.00673511	143.813	0.000733667
6633.17	0.01227	127.09	0.00460022	127.09	0.00575633	127.09	0.00281778	127.09	0.00125411	127.09	0.000638222	127.09	0.000288333	127.09	0.00904378	127.09	0.00635111	147.157	0.000884667
6783.92	0.0123	130.435	0.00466922	130.435	0.00610733	130.435	0.00285578	130.435	0.00116911	130.435	0.000666222	130.435	0.000198333	130.435	0.00913378	130.435	0.00630211	150.502	0.000838667
6934.67	0.01184	133.779	0.00475522	133.779	0.00567333	133.779	0.00237678	133.779	0.00125011	133.779	0.000670222	133.779	0.000305333	133.779	0.00877978	133.779	0.00646511	153.846	0.000832667
7085.43	0.01195	137.124	0.00474622	137.124	0.00587233	137.124	0.00286378	137.124	0.00124811	137.124	0.000738222	137.124	0.000336333	137.124	0.00836178	137.124	0.00638511	157.191	0.000787667
7236.18	0.0114	140.468	0.00461622	140.468	0.00543433	140.468	0.00255078	140.468	0.00113111	140.468	0.000824222	140.468	0.000339333	140.468	0.00811578	140.468	0.00596011	160.535	0.000926667
7386.94	0.01136	143.813	0.00430922	143.813	0.00513033	143.813	0.00237778	143.813	0.00108311	143.813	0.000564222	143.813	0.000290333	143.813	0.00850178	143.813	0.00634411	163.88	0.000789667
7537.69	0.01095	147.157	0.00394322	147.157	0.00505133	147.157	0.00246278	147.157	0.00117811	147.157	0.000601222	147.157	0.000307333	147.157	0.00823178	147.157	0.00607511	167.224	0.000917667
7688.44	0.01099	150.502	0.00439522	150.502	0.00499433	150.502	0.00283378	150.502	0.00127911	150.502	0.000548222	150.502	0.000308333	150.502	0.00801078	150.502	0.00578111	170.569	0.000754667
7839.2	0.01095	153.846	0.00423922	153.846	0.00502233	153.846	0.00245978	153.846	0.00103811	153.846	0.000624222	153.846	0.000165333	153.846	0.00779678	153.846	0.00582811	173.913	0.000835667
7989.95	0.01094	157.191	0.00412722	157.191	0.00453233	157.191	0.00255378	157.191	0.00111411	157.191	0.000510222	157.191	0.000263333	157.191	0.00717278	157.191	0.00565111	177.258	0.000688667
8140.7	0.01083	160.535	0.00392722	160.535	0.00464733	160.535	0.00240878	160.535	0.00110211	160.535	0.000665222	160.535	0.000241333	160.535	0.00707578	160.535	0.00540711	180.602	0.000833667
8291.46	0.01088	163.88	0.00377722	163.88	0.00439033	163.88	0.00233378	163.88	0.00118711	163.88	0.000754222	163.88	0.000277333	163.88	0.00707878	163.88	0.00567311	183.946	0.000679667
8442.21	0.01052	167.224	0.00362022	167.224	0.00444633	167.224	0.00250178	167.224	0.00112211	167.224	0.000662222	167.224	0.000300333	167.224	0.00683178	167.224	0.00536611	187.291	0.000670667
8592.96	0.01027	170.569	0.00370022	170.569	0.00472333	170.569	0.00258678	170.569	0.00120311	170.569	0.000500222	170.569	0.000181333	170.569	0.00680478	170.569	0.00544311	190.635	0.000706667
8743.72	0.0104	173.913	0.00355022	173.913	0.00451233	173.913	0.00263578	173.913	0.000986111	173.913	0.000487222	173.913	0.000214333	173.913	0.00679078	173.913	0.00546111	193.98	0.000668667
8894.47	0.00986	177.258	0.00368022	177.258	0.00393233	177.258	0.00274378	177.258	0.00107411	177.258	0.000621222	177.258	0.000201333	177.258	0.00622278	177.258	0.00536111	197.324	0.000820667
9045.23	0.0104	180.602	0.00359722	180.602	0.00420033	180.602	0.00230878	180.602	0.00125011	180.602	0.000576222	180.602	0.000166333	180.602	0.00557278	180.602	0.00490311	200.669	0.000741667
9195.98	0.00954	183.946	0.00370922	183.946	0.00401233	183.946	0.00225678	183.946	0.00114011	183.946	0.000576222	183.946	0.000241333	183.946	0.00609678	183.946	0.00507511	204.013	0.000680667
9346.73	0.01008	187.291	0.00377922	187.291	0.00376133	187.291	0.00244878	187.291	0.00100711	187.291	0.000567222	187.291	0.000297333	187.291	0.00618578	187.291	0.00527311	207.358	0.000817667
9497.49	0.00975	190.635	0.00362222	190.635	0.00397033	190.635	0.00232678	190.635	0.000973111	190.635	0.000606222	190.635	0.000209333	190.635	0.00594978	190.635	0.00514311	210.702	0.000660667
9648.24	0.00963	193.98	0.00335222	193.98	0.00351633	193.98	0.00240878	193.98	0.00112411	193.98	0.000551222	193.98	0.000368333	193.98	0.00591878	193.98	0.00523011	214.047	0.000642667
9799	0.00892	197.324	0.00315022	197.324	0.00387633	197.324	0.00226778	197.324	0.00104911	197.324	0.000642222	197.324	0.000339333	197.324	0.00534678	197.324	0.00479811	217.391	0.000756667
9949.75	0.00886	200.669	0.00325822	200.669	0.00354733	200.669	0.00241278	200.669	0.00106311	200.669	0.000519222	200.669	0.000189333	200.669	0.00569578	200.669	0.00461311	220.736	0.000746667
10100.5	0.00952	204.013	0.00311222	204.013	0.00346433	204.013	0.00212078	204.013	0.00101611	204.013	0.000737222	204.013	0.000317333	204.013	0.00536978	204.013	0.00486111	224.08	0.000639667
10251.3	0.0092	207.358	0.00297022	207.358	0.00338633	207.358	0.00242878	207.358	0.00109911	207.358	0.000755222	207.358	0.000217333	207.358	0.00525678	207.358	0.00494611	227.425	0.000563667
10402	0.0086	210.702	0.00294622	210.702	0.00354833	210.702	0.00223078	210.702	0.00112911	210.702	0.000606222	210.702	0.000126333	210.702	0.00501378	210.702	0.00451611	230.769	0.000736667
10552.8	0.0088	214.047	0.00299922	214.047	0.00345233	214.047	0.00244578	214.047	0.00115011	214.047	0.000561222	214.047	0.000290333	214.047	0.00553378	214.047	0.00475611	234.114	0.000747667
10703.5	0.00877	217.391	0.00275322	217.391	0.00323533	217.391	0.00247178	217.391	0.00114611	217.391	0.000626222	217.391	0.000276333	217.391	0.00484578	217.391	0.00467111	237.458	0.000664667
10854.3	0.00867	220.736	0.00287622	220.736	0.00312633	220.736	0.00205578	220.736	0.00129811	220.736	0.000632222	220.736	0.000220333	220.736	0.00495278	220.736	0.00478011	240.803	0.000759667
11005	0.00779	224.08	0.00288222	224.08	0.00312033	224.08	0.00201178	224.08	0.000957111	224.08	0.000591222	224.08	0.000245333	224.08	0.00494378	224.08	0.00419311	244.147	0.000698667
11155.8	0.00837	227.425	0.00271922	227.425	0.00290833	227.425	0.00222678	227.425	0.00129411	227.425	0.000565222	227.425	0.000254333	227.425	0.00471978	227.425	0.00446111	247.492	0.000879667
11306.5	0.00846	230.769	0.00288522	230.769	0.00316733	230.769	0.00205278	230.769	0.000823111	230.769	0.000484222	230.769	0.000226333	230.769	0.00428278	230.769	0.00448211	250.836	0.000846667
11457.3	0.00796	234.114	0.00261022	234.114	0.00283033	234.114	0.00199278	234.114	0.000877111	234.114	0.000602222	234.114	0.000235333	234.114	0.00484478	234.114	0.00429511	254.181	0.000620667
11608	0.00736	237.458	0.00261822	237.458	0.00298033	237.458	0.00211978	237.458	0.00105411	237.458	0.000590222	237.458	0.000260333	237.458	0.00460878	237.458	0.00410311	257.525	0.000588667
11758.8	0.00781	240.803	0.00271622	240.803	0.00271733	240.803	0.00233678	240.803	0.00109211	240.803	0.000651222	240.803	0.000257333	240.803	0.00443078	240.803	0.00399411	260.87	0.000797667
11909.5	0.00784	244.147	0.00234722	244.147	0.00259333	244.147	0.00193978	244.147	0.00109911	244.147	0.000676222	244.147	0.000251333	244.147	0.00412578	244.147	0.00409511	264.214	0.000704667
12060.3	0.00736	247.492	0.00241022	247.492	0.00265633	247.492	0.00206378	247.492	0.00108211	247.492	0.000664222	247.492	0.000287333	247.492	0.00443478	247.492	0.00388311	267.559	0.000639667
12211.1	0.00771	250.836	0.00252222	250.836	0.00265433	250.836	0.00206178	250.836	0.00107711	250.836	0.000610222	250.836	0.000260333	250.836	0.00439878	250.836	0.00369011	270.903	0.000752667
12361.8	0.0078	254.181	0.00221522	254.181	0.00277533	254.181	0.00203978	254.181	0.00107911	254.181	0.000562222	254.181	0.000258333	254.181	0.00410878	254.181	0.00380111	274.247	0.000724667
12512.6	0.00749	257.525	0.00228422	257.525	0.00226433	257.525	0.00187078	257.525	0.000888111	257.525	0.000459222	257.525	0.000200333	257.525	0.00352578	257.525	0.00405111	277.592	0.000812667
12663.3	0.00701	260.87	0.00240722	260.87	0.00236333	260.87	0.00233078	260.87	0.000944111	260.87	0.000682222	260.87	0.000284333	260.87	0.00406578	260.87	0.00406311	280.936	0.000817667
12814.1	0.00736	264.214	0.00215722	264.214	0.00233033	264.214	0.00195878	264.214	0.000999111	264.214	0.000656222	264.214	0.000227333	264.214	0.00374878	264.214	0.00374311	284.281	0.000825667
12964.8	0.00724	267.559	0.00254822	267.559	0.00221333	267.559	0.00196278	267.559	0.00105211	267.559	0.000508222	267.559	0.000203333	267.559	0.00398178	267.559	0.00324011	287.625	0.000866667
13115.6	0.00682	270.903	0.00214322	270.903	0.00238633	270.903	0.00208378	270.903	0.00110711	270.903	0.000685222	270.903	0.000244333	270.903	0.00390078	270.903	0.00383511	290.97	0.000655667
13266.3	0.00676	274.247	0.00230622	274.247	0.00232633	274.247	0.00200278	274.247	0.00107011	274.247	0.000537222	274.247	0.000225333	274.247	0.00344278	274.247	0.00382611	294.314	0.000778667
13417.1	0.00717	277.592	0.00205622	277.592	0.00237333	277.592	0.00186978	277.592	0.000963111	277.592	0.000441222	277.592	0.000285333	277.592	0.00372478	277.592	0.00375511	297.659	0.000738667
13567.8	0.00656	280.936	0.00215822	280.936	0.00222833	280.936	0.00198878	280.936	0.000853111	280.936	0.000502222	280.936	0.000170333	280.936	0.00340278	280.936	0.00347411	301.003	0.000643667
13718.6	0.00673	284.281	0.00197322	284.281	0.00218833	284.281	0.00171578	284.281	0.000830111	284.281	0.000481222	284.281	0.000187333	284.281	0.00314178	284.281	0.00322711	304.348	0.000672667
13869.3	0.00651	287.625	0.00196222	287.625	0.00224133	287.625	0.00188678	287.625	0.000848111	287.625	0.000554222	287.625	0.000234333	287.625	0.00323078	287.625	0.00320411	307.692	0.000674667
14020.1	0.00612	290.97	0.00192822	290.97	0.00200433	290.97	0.00198578	290.97	0.00106211	290.97	0.000535222	290.97	0.000310333	290.97	0.00342278	290.97	0.00359611	311.037	0.000607667
14170.9	0.0065	294.314	0.00192722	294.314	0.00198033	294.314	0.00189378	294.314	0.00102711	294.314	0.000429222	294.314	0.000225333	294.314	0.00306978	294.314	0.00342411	314.381	0.000709667
14321.6	0.00642	297.659	0.00191722	297.659	0.00188533	297.659	0.00198878	297.659	0.00105811	297.659	0.000575222	297.659	0.000184333	297.659	0.00325278	297.659	0.00310711	317.726	0.000613667
14472.4	0.00605	301.003	0.00185722	301.003	0.00193833	301.003	0.00193578	301.003	0.000938111	301.003	0.000579222	301.003	0.000201333	301.003	0.00319578	301.003	0.00345811	321.07	0.000775667
14623.1	0.00624	304.348	0.00184622	304.348	0.00183133	304.348	0.00189578	304.348	0.000930111	304.348	0.000579222	304.348	0.000253333	304.348	0.00282978	304.348	0.00330111	324.415	0.000718667
14773.9	0.00573	307.692	0.00170022	307.692	0.00170333	307.692	0.00201278	307.692	0.00108911	307.692	0.000606222	307.692	0.000240333	307.692	0.00297578	307.692	0.00308011	327.759	0.000753667
14924.6	0.00599	311.037	0.00160822	311.037	0.00174833	311.037	0.00179278	311.037	0.00100211	311.037	0.000426222	311.037	0.000148333	311.037	0.00310078	311.037	0.00309611	331.104	0.000731667
15075.4	0.00582	314.381	0.00178022	314.381	0.00196733	314.381	0.00192278	314.381	0.00100911	314.381	0.000558222	314.381	0.000199333	314.381	0.00290478	314.381	0.00297611	334.448	0.000688667
15226.1	0.00561	317.726	0.00189722	317.726	0.00170733	317.726	0.00167978	317.726	0.000862111	317.726	0.000666222	317.726	0.000244333	317.726	0.00273678	317.726	0.00320211	337.793	0.000681667
15376.9	0.00577	321.07	0.00186022	321.07	0.00161033	321.07	0.00199078	321.07	0.000997111	321.07	0.000520222	321.07	0.000265333	321.07	0.00266478	321.07	0.00295011	341.137	0.000716667
15527.6	0.00574	324.415	0.00169322	324.415	0.00167233	324.415	0.00182078	324.415	0.000974111	324.415	0.000492222	324.415	0.000205333	324.415	0.00276378	324.415	0.00300111	344.482	0.000580667
15678.4	0.00563	327.759	0.00159422	327.759	0.00158733	327.759	0.00167878	327.759	0.000773111	327.759	0.000590222	327.759	0.000268333	327.759	0.00257578	327.759	0.00316811	347.826	0.000707667
15829.1	0.00557	331.104	0.00172522	331.104	0.00171733	331.104	0.00153278	331.104	0.000932111	331.104	0.000567222	331.104	0.000279333	331.104	0.00256178	331.104	0.00283711	351.171	0.000621667
15979.9	0.00515	334.448	0.00176522	334.448	0.00136433	334.448	0.00172078	334.448	0.000866111	334.448	0.000534222	334.448	0.000197333	334.448	0.00236478	334.448	0.00292511	354.515	0.000613667
16130.7	0.00535	337.793	0.00155422	337.793	0.00159633	337.793	0.00157678	337.793	0.000878111	337.793	0.000530222	337.793	0.000244333	337.793	0.00251078	337.793	0.00300811	357.86	0.000665667
16281.4	0.00533	341.137	0.00143722	341.137	0.00150433	341.137	0.00168678	341.137	0.000941111	341.137	0.000505222	341.137	0.000306333	341.137	0.00238178	341.137	0.00276011	361.204	0.000646667
16432.2	0.00503	344.482	0.00143522	344.482	0.00146833	344.482	0.00167778	344.482	0.000833111	344.482	0.000461222	344.482	0.000244333	344.482	0.00234078	344.482	0.00273311	364.548	0.000779667
16582.9	0.00543	347.826	0.00157922	347.826	0.00138333	347.826	0.00172278	347.826	0.000982111	347.826	0.000582222	347.826	0.000308333	347.826	0.00261678	347.826	0.00287111	367.893	0.000736667
16733.7	0.00536	351.171	0.00142622	351.171	0.00145433	351.171	0.00159378	351.171	0.000813111	351.171	0.000637222	351.171	0.000215333	351.171	0.00246678	351.171	0.00259511	371.237	0.000655667
16884.4	0.00574	354.515	0.00149322	354.515	0.00140433	354.515	0.00177278	354.515	0.000924111	354.515	0.000630222	354.515	0.000207333	354.515	0.00221678	354.515	0.00256511	374.582	0.000618667
17035.2	0.00526	357.86	0.00131522	357.86	0.00134333	357.86	0.00156578	357.86	0.000870111	357.86	0.000580222	357.86	0.000217333	357.86	0.00226678	357.86	0.00271211	377.926	0.000635667
17185.9	0.00469	361.204	0.00137522	361.204	0.00132333	361.204	0.00164978	361.204	0.000858111	361.204	0.000472222	361.204	0.000246333	361.204	0.00209878	361.204	0.00256511	381.271	0.000547667
17336.7	0.00447	364.548	0.00146322	364.548	0.00138633	364.548	0.00160678	364.548	0.000946111	364.548	0.000726222	364.548	0.000254333	364.548	0.00226478	364.548	0.00245111	384.615	0.000545667
17487.4	0.00448	367.893	0.00145522	367.893	0.00130133	367.893	0.00169978	367.893	0.000856111	367.893	0.000567222	367.893	0.000219333	367.893	0.00206478	367.893	0.00252311	387.96	0.000612667
17638.2	0.00496	371.237	0.00115722	371.237	0.00122233	371.237	0.00152578	371.237	0.000947111	371.237	0.000548222	371.237	0.000286333	371.237	0.00228178	371.237	0.00222411	391.304	0.000585667
17788.9	0.00486	374.582	0.00118722	374.582	0.00137333	374.582	0.00159378	374.582	0.000812111	374.582	0.000435222	374.582	0.000197333	374.582	0.00194578	374.582	0.00244711	394.649	0.000659667
17939.7	0.00461	377.926	0.00156922	377.926	0.00120133	377.926	0.00158778	377.926	0.000819111	377.926	0.000694222	377.926	0.000153333	377.926	0.00206678	377.926	0.00221211	397.993	0.000664667
18090.5	0.00445	381.271	0.00121622	381.271	0.00106433	381.271	0.00175078	381.271	0.000950111	381.271	0.000571222	381.271	0.000229333	381.271	0.00201178	381.271	0.00216211	401.338	0.000741667
18241.2	0.00426	384.615	0.00129222	384.615	0.00118133	384.615	0.00162078	384.615	0.00102611	384.615	0.000568222	384.615	0.000240333	384.615	0.00205078	384.615	0.00257411	404.682	0.000581667
18392	0.00456	387.96	0.00126722	387.96	0.00110033	387.96	0.00146378	387.96	0.000900111	387.96	0.000566222	387.96	0.000154333	387.96	0.00189178	387.96	0.00232311	408.027	0.000620667
18542.7	0.0043	391.304	0.00119022	391.304	0.00110133	391.304	0.00157378	391.304	0.000996111	391.304	0.000505222	391.304	0.000220333	391.304	0.00184478	391.304	0.00240411	411.371	0.000719667
18693.5	0.00434	394.649	0.00101022	394.649	0.00112333	394.649	0.00145978	394.649	0.000734111	394.649	0.000474222	394.649	0.000281333	394.649	0.00200578	394.649	0.00205711	414.716	0.000711667
18844.2	0.00414	397.993	0.00120222	397.993	0.00128733	397.993	0.00133678	397.993	0.000917111	397.993	0.000544222	397.993	0.000173333	397.993	0.00182578	397.993	0.00214311	418.06	0.000656667
18995	0.00416	401.338	0.00116022	401.338	0.000951333	401.338	0.00135078	401.338	0.000860111	401.338	0.000519222	401.338	0.000185333	401.338	0.00174578	401.338	0.00223211	421.405	0.000561667
19145.7	0.00393	404.682	0.00148222	404.682	0.000916333	404.682	0.00139178	404.682	0.000816111	404.682	0.000580222	404.682	0.000217333	404.682	0.00186678	404.682	0.00208311	424.749	0.000639667
19296.5	0.00401	408.027	0.00110622	408.027	0.00109133	408.027	0.00146178	408.027	0.000761111	408.027	0.000561222	408.027	0.000197333	408.027	0.00174578	408.027	0.00238311	428.094	0.000562667
19447.2	0.00421	411.371	0.00120822	411.371	0.000992333	411.371	0.00148178	411.371	0.000810111	411.371	0.000560222	411.371	0.000217333	411.371	0.00167678	411.371	0.00223211	431.438	0.000598667
19598	0.00397	414.716	0.00127522	414.716	0.00100633	414.716	0.00144678	414.716	0.000912111	414.716	0.000498222	414.716	0.000171333	414.716	0.00150578	414.716	0.00204311	434.783	0.000715667
19748.7	0.00413	418.06	0.00125022	418.06	0.00105033	418.06	0.00150178	418.06	0.000736111	418.06	0.000507222	418.06	0.000227333	418.06	0.00175678	418.06	0.00195311	438.127	0.000550667
19899.5	0.00401	421.405	0.00106622	421.405	0.000947333	421.405	0.00145178	421.405	0.000742111	421.405	0.000431222	421.405	0.000221333	421.405	0.00149878	421.405	0.00215111	441.472	0.000676667
20050.3	0.00382	424.749	0.00106622	424.749	0.00100333	424.749	0.00132578	424.749	0.000727111	424.749	0.000507222	424.749	0.000328333	424.749	0.00166078	424.749	0.00211811	444.816	0.000610667
		428.094	0.00120022	428.094	0.00103033	428.094	0.00139878	428.094	0.000664111	428.094	0.000486222	428.094	0.000221333	428.094	0.00168178	428.094	0.00187111	448.161	0.000476667
		431.438	0.00117322	431.438	0.00101733	431.438	0.00149678	431.438	0.000919111	431.438	0.000557222	431.438	0.000170333	431.438	0.00161578	431.438	0.00187411	451.505	0.000605667
		434.783	0.00112922	434.783	0.00111033	434.783	0.00146978	434.783	0.000924111	434.783	0.000595222	434.783	0.000221333	434.783	0.00163078	434.783	0.00184411	454.849	0.000566667
		438.127	0.000967222	438.127	0.000880333	438.127	0.00147178	438.127	0.000911111	438.127	0.000488222	438.127	0.000195333	438.127	0.00151978	438.127	0.00208111	458.194	0.000658667
		441.472	0.000969222	441.472	0.000945333	441.472	0.00146878	441.472	0.000732111	441.472	0.000459222	441.472	0.000261333	441.472	0.00152678	441.472	0.00186411	461.538	0.000578667
		444.816	0.00103222	444.816	0.000914333	444.816	0.00146278	444.816	0.000788111	444.816	0.000552222	444.816	0.000186333	444.816	0.00144578	444.816	0.00188311	464.883	0.000721667
		448.161	0.000898222	448.161	0.000917333	448.161	0.00136778	448.161	0.000842111	448.161	0.000505222	448.161	0.000221333	448.161	0.00129278	448.161	0.00177611	468.227	0.000624667
		451.505	0.000972222	451.505	0.00102333	451.505	0.00137778	451.505	0.000814111	451.505	0.000516222	451.505	0.000210333	451.505	0.00146278	451.505	0.00192611	471.572	0.000558667
		454.849	0.00116822	454.849	0.000832333	454.849	0.00135678	454.849	0.000767111	454.849	0.000519222	454.849	0.000219333	454.849	0.00135178	454.849	0.00188811	474.916	0.000707667
		458.194	0.000870222	458.194	0.000718333	458.194	0.00131878	458.194	0.000826111	458.194	0.000528222	458.194	0.000227333	458.194	0.00146078	458.194	0.00181611	478.261	0.000662667
		461.538	0.000875222	461.538	0.000968333	461.538	0.00127878	461.538	0.000963111	461.538	0.000437222	461.538	0.000238333	461.538	0.00158878	461.538	0.00178511	481.605	0.000655667
		464.883	0.000943222	464.883	0.000817333	464.883	0.00127078	464.883	0.000787111	464.883	0.000451222	464.883	0.000209333	464.883	0.00121578	464.883	0.00178611	484.95	0.000608667
		468.227	0.000860222	468.227	0.000803333	468.227	0.00132378	468.227	0.000844111	468.227	0.000486222	468.227	0.000228333	468.227	0.00135878	468.227	0.00182811	488.294	0.000643667
		471.572	0.000867222	471.572	0.000707333	471.572	0.00123678	471.572	0.000791111	471.572	0.000367222	471.572	0.000190333	471.572	0.00134878	471.572	0.00174511	491.639	0.000680667
		474.916	0.000929222	474.916	0.000916333	474.916	0.00117978	474.916	0.000856111	474.916	0.000527222	474.916	0.000224333	474.916	0.00110478	474.916	0.00191511	494.983	0.000593667
		478.261	0.000950222	478.261	0.000855333	478.261	0.00137578	478.261	0.000829111	478.261	0.000586222	478.261	0.000166333	478.261	0.00116278	478.261	0.00168211	498.328	0.000526667
		481.605	0.000853222	481.605	0.000853333	481.605	0.00121378	481.605	0.000914111	481.605	0.000524222	481.605	0.000223333	481.605	0.00120878	481.605	0.00179211	501.672	0.000564667
		484.95	0.000848222	484.95	0.000702333	484.95	0.00118678	484.95	0.000941111	484.95	0.000451222	484.95	0.000149333	484.95	0.00128078	484.95	0.00178611	505.017	0.000639667
		488.294	0.000814222	488.294	0.000724333	488.294	0.00121978	488.294	0.000869111	488.294	0.000579222	488.294	0.000201333	488.294	0.00118278	488.294	0.00180811	508.361	0.000511667
		491.639	0.000868222	491.639	0.000805333	491.639	0.00118178	491.639	0.000678111	491.639	0.000401222	491.639	0.000255333	491.639	0.00124978	491.639	0.00155211	511.706	0.000535667
		494.983	0.000777222	494.983	0.000676333	494.983	0.00138578	494.983	0.000799111	494.983	0.000497222	494.983	0.000260333	494.983	0.00103978	494.983	0.00163611	515.05	0.000563667
		498.328	0.000780222	498.328	0.000676333	498.328	0.00105878	498.328	0.000726111	498.328	0.000504222	498.328	0.000197333	498.328	0.00109378	498.328	0.00156411	518.395	0.000669667
		501.672	0.000910222	501.672	0.000803333	501.672	0.00133078	501.672	0.000750111	501.672	0.000511222	501.672	0.000263333	501.672	0.00123578	501.672	0.00154111	521.739	0.000553667
		505.017	0.000839222	505.017	0.000753333	505.017	0.00136978	505.017	0.000673111	505.017	0.000507222	505.017	0.000153333	505.017	0.00132078	505.017	0.00141811	525.084	0.000585667
		508.361	0.000757222	508.361	0.000706333	508.361	0.00129378	508.361	0.000734111	508.361	0.000509222	508.361	0.000277333	508.361	0.00131978	508.361	0.00150611	528.428	0.000570667
		511.706	0.000935222	511.706	0.000715333	511.706	0.00116678	511.706	0.000672111	511.706	0.000426222	511.706	0.000207333	511.706	0.00110978	511.706	0.00166211	531.773	0.000607667
		515.05	0.000869222	515.05	0.000812333	515.05	0.00111778	515.05	0.000766111	515.05	0.000497222	515.05	0.000233333	515.05	0.00103878	515.05	0.00158511	535.117	0.000716667
		518.395	0.000632222	518.395	0.000654333	518.395	0.00121278	518.395	0.000669111	518.395	0.000480222	518.395	0.000207333	518.395	0.00101978	518.395	0.00169211	538.462	0.000672667
		521.739	0.000687222	521.739	0.000714333	521.739	0.00132178	521.739	0.000766111	521.739	0.000557222	521.739	0.000243333	521.739	0.00104978	521.739	0.00147511	541.806	0.000622667
		525.084	0.000645222	525.084	0.000670333	525.084	0.00114578	525.084	0.000773111	525.084	0.000431222	525.084	0.000134333	525.084	0.000933778	525.084	0.00151611	545.151	0.000569667
		528.428	0.000840222	528.428	0.000503333	528.428	0.00116178	528.428	0.000758111	528.428	0.000412222	528.428	0.000153333	528.428	0.000985778	528.428	0.00130211	548.495	0.000389667
		531.773	0.000680222	531.773	0.000551333	531.773	0.00115878	531.773	0.000729111	531.773	0.000444222	531.773	0.000196333	531.773	0.00118078	531.773	0.00134311	551.839	0.000646667
		535.117	0.000742222	535.117	0.000666333	535.117	0.000950778	535.117	0.000698111	535.117	0.000470222	535.117	0.000210333	535.117	0.00108378	535.117	0.00152011	555.184	0.000582667
		538.462	0.000747222	538.462	0.000483333	538.462	0.00121678	538.462	0.000868111	538.462	0.000477222	538.462	0.000255333	538.462	0.00103878	538.462	0.00137411	558.528	0.000660667
		541.806	0.000607222	541.806	0.000733333	541.806	0.00114278	541.806	0.000799111	541.806	0.000518222	541.806	0.000134333	541.806	0.000923778	541.806	0.00132011	561.873	0.000530667
		545.151	0.000735222	545.151	0.000606333	545.151	0.00103778	545.151	0.000743111	545.151	0.000425222	545.151	0.000204333	545.151	0.00114278	545.151	0.00153411	565.217	0.000606667
		548.495	0.000703222	548.495	0.000713333	548.495	0.00108978	548.495	0.000744111	548.495	0.000497222	548.495	0.000211333	548.495	0.00102578	548.495	0.00136511	568.562	0.000517667
		551.839	0.000727222	551.839	0.000751333	551.839	0.00109378	551.839	0.000693111	551.839	0.000471222	551.839	0.000174333	551.839	0.000889778	551.839	0.00138711	571.906	0.000593667
		555.184	0.000750222	555.184	0.000557333	555.184	0.00106278	555.184	0.000609111	555.184	0.000505222	555.184	0.000201333	555.184	0.000730778	555.184	0.00123311	575.251	0.000475667
		558.528	0.000765222	558.528	0.000633333	558.528	0.00101878	558.528	0.000664111	558.528	0.000572222	558.528	0.000210333	558.528	0.000940778	558.528	0.00112311	578.595	0.000532667
		561.873	0.000693222	561.873	0.000443333	561.873	0.00130678	561.873	0.000742111	561.873	0.000487222	561.873	0.000157333	561.873	0.000938778	561.873	0.00142111	581.94	0.000557667
		565.217	0.000766222	565.217	0.000475333	565.217	0.000990778	565.217	0.000656111	565.217	0.000404222	565.217	0.000216333	565.217	0.000798778	565.217	0.00140311	585.284	0.000481667
		568.562	0.000602222	568.562	0.000510333	568.562	0.00126278	568.562	0.000832111	568.562	0.000590222	568.562	0.000219333	568.562	0.000828778	568.562	0.00136111	588.629	0.000544667
		571.906	0.000608222	571.906	0.000553333	571.906	0.000949778	571.906	0.000708111	571.906	0.000524222	571.906	0.000153333	571.906	0.000835778	571.906	0.00126511	591.973	0.000496667
		575.251	0.000626222	575.251	0.000458333	575.251	0.00119578	575.251	0.000750111	575.251	0.000388222	575.251	0.000121333	575.251	0.000746778	575.251	0.00134611	595.318	0.000623667
		578.595	0.000622222	578.595	0.000424333	578.595	0.000958778	578.595	0.000762111	578.595	0.000561222	578.595	0.000150333	578.595	0.000876778	578.595	0.00113411	598.662	0.000450667
		581.94	0.000574222	581.94	0.000573333	581.94	0.000973778	581.94	0.000791111	581.94	0.000318222	581.94	0.000265333	581.94	0.000823778	581.94	0.00134411	602.007	0.000553667
		585.284	0.000857222	585.284	0.000438333	585.284	0.00118878	585.284	0.000780111	585.284	0.000474222	585.284	0.000228333	585.284	0.000930778	585.284	0.00107511	605.351	0.000655667
		588.629	0.000610222	588.629	0.000530333	588.629	0.000998778	588.629	0.000687111	588.629	0.000552222	588.629	0.000270333	588.629	0.000876778	588.629	0.00124011	608.696	0.000553667
		591.973	0.000608222	591.973	0.000561333	591.973	0.00108078	591.973	0.000610111	591.973	0.000397222	591.973	0.000173333	591.973	0.000840778	591.973	0.00119011	612.04	0.000477667
		595.318	0.000689222	595.318	0.000487333	595.318	0.00101578	595.318	0.000726111	595.318	0.000542222	595.318	0.000223333	595.318	0.000901778	595.318	0.000986111	615.385	0.000602667
		598.662	0.000585222	598.662	0.000504333	598.662	0.00110978	598.662	0.000698111	598.662	0.000528222	598.662	0.000243333	598.662	0.000814778	598.662	0.00129111	618.729	0.000583667
		602.007	0.000600222	602.007	0.000541333	602.007	0.00109078	602.007	0.000651111	602.007	0.000425222	602.007	0.000251333	602.007	0.000720778	602.007	0.00118811	622.074	0.000573667
		605.351	0.000587222	605.351	0.000535333	605.351	0.000837778	605.351	0.000694111	605.351	0.000537222	605.351	0.000169333	605.351	0.000728778	605.351	0.00119811	625.418	0.000570667
		608.696	0.000565222	608.696	0.000470333	608.696	0.00100078	608.696	0.000711111	608.696	0.000388222	608.696	0.000160333	608.696	0.000833778	608.696	0.00127511	628.763	0.000529667
		612.04	0.000590222	612.04	0.000376333	612.04	0.000956778	612.04	0.000682111	612.04	0.000440222	612.04	0.000145333	612.04	0.000659778	612.04	0.00115011	632.107	0.000582667
		615.385	0.000513222	615.385	0.000354333	615.385	0.00108278	615.385	0.000636111	615.385	0.000459222	615.385	0.000156333	615.385	0.000781778	615.385	0.00105211	635.452	0.000647667
		618.729	0.000612222	618.729	0.000447333	618.729	0.000837778	618.729	0.000599111	618.729	0.000407222	618.729	0.000183333	618.729	0.000729778	618.729	0.000902111	638.796	0.000562667
		622.074	0.000412222	622.074	0.000448333	622.074	0.00100578	622.074	0.000687111	622.074	0.000412222	622.074	0.000153333	622.074	0.000589778	622.074	0.00119811	642.14	0.000510667
		625.418	0.000574222	625.418	0.000444333	625.418	0.000938778	625.418	0.000800111	625.418	0.000391222	625.418	0.000163333	625.418	0.000756778	625.418	0.00121811	645.485	0.000589667
		628.763	0.000666222	628.763	0.000443333	628.763	0.00103578	628.763	0.000594111	628.763	0.000558222	628.763	0.000166333	628.763	0.000643778	628.763	0.00116011	648.829	0.000542667
		632.107	0.000530222	632.107	0.000486333	632.107	0.000912778	632.107	0.000684111	632.107	0.000529222	632.107	0.000134333	632.107	0.000666778	632.107	0.00110811	652.174	0.000481667
		635.452	0.000417222	635.452	0.000556333	635.452	0.000873778	635.452	0.000588111	635.452	0.000460222	635.452	0.000123333	635.452	0.000691778	635.452	0.00132211	655.518	0.000551667
		638.796	0.000646222	638.796	0.000476333	638.796	0.00106278	638.796	0.000671111	638.796	0.000444222	638.796	0.000143333	638.796	0.000720778	638.796	0.00106111	658.863	0.000564667
		642.14	0.000529222	642.14	0.000463333	642.14	0.000917778	642.14	0.000681111	642.14	0.000395222	642.14	0.000210333	642.14	0.000680778	642.14	0.000931111	662.207	0.000532667
		645.485	0.000529222	645.485	0.000375333	645.485	0.000866778	645.485	0.000691111	645.485	0.000375222	645.485	0.000200333	645.485	0.000642778	645.485	0.00103611	665.552	0.000547667
		648.829	0.000544222	648.829	0.000420333	648.829	0.000937778	648.829	0.000536111	648.829	0.000397222	648.829	0.000205333	648.829	0.000672778	648.829	0.00112411	668.896	0.000596667
		652.174	0.000569222	652.174	0.000507333	652.174	0.00108178	652.174	0.000743111	652.174	0.000577222	652.174	0.000196333	652.174	0.000651778	652.174	0.00115411	672.241	0.000465667
		655.518	0.000549222	655.518	0.000410333	655.518	0.000881778	655.518	0.000589111	655.518	0.000437222	655.518	0.000226333	655.518	0.000619778	655.518	0.000943111	675.585	0.000530667
		658.863	0.000337222	658.863	0.000367333	658.863	0.000793778	658.863	0.000532111	658.863	0.000522222	658.863	0.000125333	658.863	0.000635778	658.863	0.000980111	678.93	0.000484667
		662.207	0.000453222	662.207	0.000373333	662.207	0.000941778	662.207	0.000641111	662.207	0.000440222	662.207	0.000217333	662.207	0.000623778	662.207	0.000914111	682.274	0.000527667
		665.552	0.000544222	665.552	0.000450333	665.552	0.000981778	665.552	0.000732111	665.552	0.000405222	665.552	0.000201333	665.552	0.000639778	665.552	0.000942111	685.619	0.000571667
		668.896	0.000403222	668.896	0.000411333	668.896	0.000959778	668.896	0.000654111	668.896	0.000376222	668.896	0.000230333	668.896	0.000580778	668.896	0.000920111	688.963	0.000437667
		672.241	0.000488222	672.241	0.000321333	672.241	0.000853778	672.241	0.000604111	672.241	0.000390222	672.241	0.000208333	672.241	0.000551778	672.241	0.000895111	692.308	0.000637667
		675.585	0.000517222	675.585	0.000367333	675.585	0.000995778	675.585	0.000684111	675.585	0.000418222	675.585	0.000179333	675.585	0.000595778	675.585	0.000994111	695.652	0.000530667
		678.93	0.000520222	678.93	0.000312333	678.93	0.000868778	678.93	0.000691111	678.93	0.000440222	678.93	0.000175333	678.93	0.000648778	678.93	0.00100311	698.997	0.000502667
		682.274	0.000358222	682.274	0.000375333	682.274	0.000911778	682.274	0.000574111	682.274	0.000500222	682.274	0.000196333	682.274	0.000531778	682.274	0.000982111	702.341	0.000511667
		685.619	0.000344222	685.619	0.000467333	685.619	0.000912778	685.619	0.000709111	685.619	0.000360222	685.619	0.000156333	685.619	0.000584778	685.619	0.000961111	705.686	0.000458667
		688.963	0.000458222	688.963	0.000257333	688.963	0.000901778	688.963	0.000569111	688.963	0.000445222	688.963	0.000156333	688.963	0.000713778	688.963	0.000832111	709.03	0.000496667
		692.308	0.000465222	692.308	0.000386333	692.308	0.000863778	692.308	0.000692111	692.308	0.000442222	692.308	0.000170333	692.308	0.000581778	692.308	0.000891111	712.375	0.000499667
		695.652	0.000385222	695.652	0.000392333	695.652	0.000722778	695.652	0.000626111	695.652	0.000417222	695.652	0.000205333	695.652	0.000582778	695.652	0.000870111	715.719	0.000415667
		698.997	0.000445222	698.997	0.000342333	698.997	0.000847778	698.997	0.000658111	698.997	0.000557222	698.997	0.000220333	698.997	0.000448778	698.997	0.000935111	719.064	0.000445667
		702.341	0.000404222	702.341	0.000433333	702.341	0.000827778	702.341	0.000739111	702.341	0.000522222	702.341	0.000166333	702.341	0.000648778	702.341	0.000856111	722.408	0.000432667
		705.686	0.000500222	705.686	0.000331333	705.686	0.000871778	705.686	0.000620111	705.686	0.000509222	705.686	0.000150333	705.686	0.000586778	705.686	0.000848111	725.753	0.000484667
		709.03	0.000396222	709.03	0.000340333	709.03	0.000846778	709.03	0.000572111	709.03	0.000456222	709.03	0.000128333	709.03	0.000495778	709.03	0.000952111	729.097	0.000586667
		712.375	0.000465222	712.375	0.000311333	712.375	0.000809778	712.375	0.000461111	712.375	0.000332222	712.375	0.000198333	712.375	0.000553778	712.375	0.000925111	732.441	0.000517667
		715.719	0.000409222	715.719	0.000292333	715.719	0.000907778	715.719	0.000723111	715.719	0.000399222	715.719	0.000197333	715.719	0.000470778	715.719	0.000862111	735.786	0.000490667
		719.064	0.000374222	719.064	0.000272333	719.064	0.000830778	719.064	0.000619111	719.064	0.000390222	719.064	0.000147333	719.064	0.000493778	719.064	0.000810111	739.13	0.000475667
		722.408	0.000478222	722.408	0.000356333	722.408	0.000832778	722.408	0.000750111	722.408	0.000455222	722.408	0.000155333	722.408	0.000418778	722.408	0.000897111	742.475	0.000518667
		725.753	0.000495222	725.753	0.000397333	725.753	0.000782778	725.753	0.000631111	725.753	0.000465222	725.753	0.000265333	725.753	0.000554778	725.753	0.000730111	745.819	0.000646667
		729.097	0.000415222	729.097	0.000327333	729.097	0.000787778	729.097	0.000810111	729.097	0.000365222	729.097	0.000221333	729.097	0.000651778	729.097	0.000833111	749.164	0.000523667
		732.441	0.000320222	732.441	0.000408333	732.441	0.000725778	732.441	0.000643111	732.441	0.000329222	732.441	0.000133333	732.441	0.000502778	732.441	0.000858111	752.508	0.000489667
		735.786	0.000416222	735.786	0.000370333	735.786	0.000786778	735.786	0.000684111	735.786	0.000446222	735.786	0.000125333	735.786	0.000509778	735.786	0.000900111	755.853	0.000439667
		739.13	0.000380222	739.13	0.000286333	739.13	0.000731778	739.13	0.000586111	739.13	0.000414222	739.13	0.000196333	739.13	0.000481778	739.13	0.000801111	759.197	0.000572667
		742.475	0.000364222	742.475	0.000325333	742.475	0.000853778	742.475	0.000661111	742.475	0.000518222	742.475	0.000197333	742.475	0.000551778	742.475	0.000861111	762.542	0.000431667
		745.819	0.000399222	745.819	0.000392333	745.819	0.000728778	745.819	0.000653111	745.819	0.000359222	745.819	0.000173333	745.819	0.000478778	745.819	0.000770111	765.886	0.000508667
		749.164	0.000357222	749.164	0.000346333	749.164	0.000819778	749.164	0.000573111	749.164	0.000402222	749.164	9.33333e-05	749.164	0.000379778	749.164	0.000792111	769.231	0.000608667
		752.508	0.000334222	752.508	0.000321333	752.508	0.000813778	752.508	0.000661111	752.508	0.000331222	752.508	0.000187333	752.508	0.000504778	752.508	0.000838111	772.575	0.000429667
		755.853	0.000422222	755.853	0.000301333	755.853	0.000680778	755.853	0.000627111	755.853	0.000287222	755.853	0.000210333	755.853	0.000465778	755.853	0.000825111	775.92	0.000559667
		759.197	0.000348222	759.197	0.000311333	759.197	0.000697778	759.197	0.000574111	759.197	0.000411222	759.197	0.000128333	759.197	0.000458778	759.197	0.000757111	779.264	0.000604667
		762.542	0.000366222	762.542	0.000330333	762.542	0.000718778	762.542	0.000641111	762.542	0.000382222	762.542	0.000205333	762.542	0.000489778	762.542	0.000634111	782.609	0.000371667
		765.886	0.000394222	765.886	0.000366333	765.886	0.000827778	765.886	0.000594111	765.886	0.000320222	765.886	0.000154333	765.886	0.000519778	765.886	0.000846111	785.953	0.000411667
		769.231	0.000350222	769.231	0.000258333	769.231	0.000712778	769.231	0.000509111	769.231	0.000442222	769.231	0.000140333	769.231	0.000564778	769.231	0.000672111	789.298	0.000404667
		772.575	0.000370222	772.575	0.000258333	772.575	0.000607778	772.575	0.000556111	772.575	0.000391222	772.575	0.000240333	772.575	0.000515778	772.575	0.000681111	792.642	0.000534667
		775.92	0.000324222	775.92	0.000251333	775.92	0.000856778	775.92	0.000651111	775.92	0.000429222	775.92	0.000175333	775.92	0.000448778	775.92	0.000842111	795.987	0.000381667
		779.264	0.000376222	779.264	0.000303333	779.264	0.000798778	779.264	0.000561111	779.264	0.000345222	779.264	0.000179333	779.264	0.000495778	779.264	0.000714111	799.331	0.000496667
		782.609	0.000343222	782.609	0.000308333	782.609	0.000828778	782.609	0.000508111	782.609	0.000361222	782.609	9.03333e-05	782.609	0.000438778	782.609	0.000617111	802.676	0.000526667
		785.953	0.000424222	785.953	0.000293333	785.953	0.000767778	785.953	0.000548111	785.953	0.000362222	785.953	0.000233333	785.953	0.000486778	785.953	0.000621111	806.02	0.000481667
		789.298	0.000327222	789.298	0.000356333	789.298	0.000812778	789.298	0.000609111	789.298	0.000429222	789.298	0.000275333	789.298	0.000432778	789.298	0.000782111	809.365	0.000581667
		792.642	0.000334222	792.642	0.000322333	792.642	0.000746778	792.642	0.000509111	792.642	0.000507222	792.642	0.000176333	792.642	0.000441778	792.642	0.000666111	812.709	0.000585667
		795.987	0.000357222	795.987	0.000256333	795.987	0.000675778	795.987	0.000686111	795.987	0.000434222	795.987	0.000246333	795.987	0.000472778	795.987	0.000738111	816.054	0.000531667
		799.331	0.000314222	799.331	0.000257333	799.331	0.000832778	799.331	0.000641111	799.331	0.000451222	799.331	0.000160333	799.331	0.000385778	799.331	0.000791111	819.398	0.000514667
		802.676	0.000335222	802.676	0.000281333	802.676	0.000702778	802.676	0.000600111	802.676	0.000435222	802.676	0.000269333	802.676	0.000378778	802.676	0.000680111	822.742	0.000513667
		806.02	0.000286222	806.02	0.000356333	806.02	0.000722778	806.02	0.000551111	806.02	0.000367222	806.02	0.000151333	806.02	0.000424778	806.02	0.000752111	826.087	0.000483667
		809.365	0.000312222	809.365	0.000291333	809.365	0.000731778	809.365	0.000620111	809.365	0.000442222	809.365	0.000155333	809.365	0.000346778	809.365	0.000568111	829.431	0.000496667
		812.709	0.000352222	812.709	0.000216333	812.709	0.000588778	812.709	0.000683111	812.709	0.000468222	812.709	0.000238333	812.709	0.000410778	812.709	0.000601111	832.776	0.000507667
		816.054	0.000398222	816.054	0.000330333	816.054	0.000621778	816.054	0.000548111	816.054	0.000385222	816.054	0.000167333	816.054	0.000415778	816.054	0.000610111	836.12	0.000480667
		819.398	0.000405222	819.398	0.000212333	819.398	0.000717778	819.398	0.000518111	819.398	0.000271222	819.398	0.000188333	819.398	0.000404778	819.398	0.000645111	839.465	0.000541667
		822.742	0.000277222	822.742	0.000188333	822.742	0.000687778	822.742	0.000512111	822.742	0.000437222	822.742	0.000153333	822.742	0.000373778	822.742	0.000614111	842.809	0.000516667
		826.087	0.000285222	826.087	0.000302333	826.087	0.000740778	826.087	0.000637111	826.087	0.000394222	826.087	0.000207333	826.087	0.000400778	826.087	0.000566111	846.154	0.000364667
		829.431	0.000406222	829.431	0.000320333	829.431	0.000613778	829.431	0.000422111	829.431	0.000349222	829.431	0.000157333	829.431	0.000353778	829.431	0.000720111	849.498	0.000511667
		832.776	0.000356222	832.776	0.000250333	832.776	0.000759778	832.776	0.000522111	832.776	0.000346222	832.776	0.000158333	832.776	0.000389778	832.776	0.000656111	852.843	0.000406667
		836.12	0.000286222	836.12	0.000307333	836.12	0.000618778	836.12	0.000589111	836.12	0.000480222	836.12	0.000115333	836.12	0.000361778	836.12	0.000588111	856.187	0.000499667
		839.465	0.000307222	839.465	0.000240333	839.465	0.000746778	839.465	0.000663111	839.465	0.000392222	839.465	0.000119333	839.465	0.000460778	839.465	0.000604111	859.532	0.000443667
		842.809	0.000314222	842.809	0.000265333	842.809	0.000753778	842.809	0.000564111	842.809	0.000427222	842.809	0.000128333	842.809	0.000454778	842.809	0.000648111	862.876	0.000531667
		846.154	0.000338222	846.154	0.000296333	846.154	0.000498778	846.154	0.000569111	846.154	0.000332222	846.154	0.000154333	846.154	0.000410778	846.154	0.000568111	866.221	0.000397667
		849.498	0.000233222	849.498	0.000268333	849.498	0.000606778	849.498	0.000432111	849.498	0.000314222	849.498	0.000140333	849.498	0.000399778	849.498	0.000530111	869.565	0.000501667
		852.843	0.000333222	852.843	0.000236333	852.843	0.000607778	852.843	0.000567111	852.843	0.000429222	852.843	0.000188333	852.843	0.000364778	852.843	0.000652111	872.91	0.000504667
		856.187	0.000307222	856.187	0.000277333	856.187	0.000690778	856.187	0.000424111	856.187	0.000492222	856.187	0.000171333	856.187	0.000444778	856.187	0.000787111	876.254	0.000460667
		859.532	0.000290222	859.532	0.000258333	859.532	0.000685778	859.532	0.000469111	859.532	0.000405222	859.532	0.000181333	859.532	0.000349778	859.532	0.000734111	879.599	0.000491667
		862.876	0.000195222	862.876	0.000236333	862.876	0.000600778	862.876	0.000561111	862.876	0.000352222	862.876	0.000127333	862.876	0.000358778	862.876	0.000472111	882.943	0.000443667
		866.221	0.000287222	866.221	0.000251333	866.221	0.000617778	866.221	0.000547111	866.221	0.000409222	866.221	0.000153333	866.221	0.000210778	866.221	0.000590111	886.288	0.000382667
		869.565	0.000333222	869.565	0.000166333	869.565	0.000746778	869.565	0.000490111	869.565	0.000305222	869.565	0.000201333	869.565	0.000290778	869.565	0.000555111	889.632	0.000430667
		872.91	0.000402222	872.91	0.000311333	872.91	0.000582778	872.91	0.000456111	872.91	0.000438222	872.91	0.000168333	872.91	0.000465778	872.91	0.000625111	892.977	0.000505667
		876.254	0.000275222	876.254	0.000211333	876.254	0.000639778	876.254	0.000729111	876.254	0.000334222	876.254	0.000116333	876.254	0.000356778	876.254	0.000614111	896.321	0.000384667
		879.599	0.000283222	879.599	0.000192333	879.599	0.000681778	879.599	0.000562111	879.599	0.000404222	879.599	0.000155333	879.599	0.000321778	879.599	0.000567111	899.666	0.000495667
		882.943	0.000312222	882.943	0.000170333	882.943	0.000689778	882.943	0.000508111	882.943	0.000346222	882.943	0.000227333	882.943	0.000289778	882.943	0.000437111	903.01	0.000503667
		886.288	0.000288222	886.288	0.000158333	886.288	0.000711778	886.288	0.000410111	886.288	0.000392222	886.288	0.000143333	886.288	0.000400778	886.288	0.000670111	906.355	0.000487667
		889.632	0.000328222	889.632	0.000233333	889.632	0.000731778	889.632	0.000497111	889.632	0.000328222	889.632	8.83333e-05	889.632	0.000439778	889.632	0.000601111	909.699	0.000435667
		892.977	0.000269222	892.977	0.000352333	892.977	0.000511778	892.977	0.000471111	892.977	0.000299222	892.977	0.000131333	892.977	0.000369778	892.977	0.000515111	913.043	0.000534667
		896.321	0.000244222	896.321	0.000298333	896.321	0.000588778	896.321	0.000528111	896.321	0.000401222	896.321	0.000137333	896.321	0.000375778	896.321	0.000511111	916.388	0.000402667
		899.666	0.000312222	899.666	0.000230333	899.666	0.000683778	899.666	0.000544111	899.666	0.000491222	899.666	0.000141333	899.666	0.000248778	899.666	0.000594111	919.732	0.000498667
		903.01	0.000359222	903.01	0.000131333	903.01	0.000671778	903.01	0.000493111	903.01	0.000405222	903.01	0.000120333	903.01	0.000338778	903.01	0.000592111	923.077	0.000496667
		906.355	0.000215222	906.355	0.000267333	906.355	0.000411778	906.355	0.000593111	906.355	0.000391222	906.355	0.000215333	906.355	0.000362778	906.355	0.000621111	926.421	0.000528667
		909.699	0.000300222	909.699	0.000220333	909.699	0.000560778	909.699	0.000614111	909.699	0.000375222	909.699	0.000100333	909.699	0.000414778	909.699	0.000506111	929.766	0.000366667
		913.043	0.000376222	913.043	0.000216333	913.043	0.000642778	913.043	0.000460111	913.043	0.000329222	913.043	0.000144333	913.043	0.000368778	913.043	0.000458111	933.11	0.000412667
		916.388	0.000207222	916.388	0.000248333	916.388	0.000563778	916.388	0.000504111	916.388	0.000421222	916.388	0.000209333	916.388	0.000385778	916.388	0.000683111	936.455	0.000505667
		919.732	0.000264222	919.732	0.000204333	919.732	0.000582778	919.732	0.000553111	919.732	0.000329222	919.732	0.000127333	919.732	0.000273778	919.732	0.000448111	939.799	0.000394667
		923.077	0.000213222	923.077	0.000204333	923.077	0.000577778	923.077	0.000519111	923.077	0.000379222	923.077	0.000108333	923.077	0.000294778	923.077	0.000408111	943.144	0.000434667
		926.421	0.000239222	926.421	0.000196333	926.421	0.000588778	926.421	0.000421111	926.421	0.000324222	926.421	0.000230333	926.421	0.000390778	926.421	0.000530111	946.488	0.000437667
		929.766	0.000233222	929.766	0.000187333	929.766	0.000501778	929.766	0.000534111	929.766	0.000279222	929.766	0.000179333	929.766	0.000331778	929.766	0.000537111	949.833	0.000389667
		933.11	0.000276222	933.11	0.000232333	933.11	0.000628778	933.11	0.000594111	933.11	0.000356222	933.11	0.000185333	933.11	0.000360778	933.11	0.000433111	953.177	0.000399667
		936.455	0.000248222	936.455	0.000206333	936.455	0.000801778	936.455	0.000590111	936.455	0.000386222	936.455	0.000183333	936.455	0.000399778	936.455	0.000411111	956.522	0.000437667
		939.799	0.000207222	939.799	0.000221333	939.799	0.000576778	939.799	0.000599111	939.799	0.000361222	939.799	0.000159333	939.799	0.000328778	939.799	0.000420111	959.866	0.000400667
		943.144	0.000180222	943.144	0.000214333	943.144	0.000572778	943.144	0.000530111	943.144	0.000385222	943.144	0.000136333	943.144	0.000323778	943.144	0.000588111	963.211	0.000400667
		946.488	0.000234222	946.488	0.000192333	946.488	0.000497778	946.488	0.000508111	946.488	0.000396222	946.488	0.000149333	946.488	0.000228778	946.488	0.000533111	966.555	0.000471667
		949.833	0.000313222	949.833	0.000228333	949.833	0.000559778	949.833	0.000410111	949.833	0.000385222	949.833	0.000165333	949.833	0.000380778	949.833	0.000456111	969.9	0.000390667
		953.177	0.000254222	953.177	0.000264333	953.177	0.000545778	953.177	0.000461111	953.177	0.000426222	953.177	0.000237333	953.177	0.000342778	953.177	0.000456111	973.244	0.000475667
		956.522	0.000359222	956.522	0.000195333	956.522	0.000640778	956.522	0.000544111	956.522	0.000367222	956.522	0.000119333	956.522	0.000388778	956.522	0.000440111	976.589	0.000435667
		959.866	0.000328222	959.866	0.000198333	959.866	0.000522778	959.866	0.000518111	959.866	0.000319222	959.866	0.000157333	959.866	0.000243778	959.866	0.000506111	979.933	0.000519667
		963.211	0.000195222	963.211	0.000147333	963.211	0.000469778	963.211	0.000540111	963.211	0.000458222	963.211	0.000120333	963.211	0.000311778	963.211	0.000443111	983.278	0.000451667
		966.555	0.000176222	966.555	0.000262333	966.555	0.000569778	966.555	0.000557111	966.555	0.000318222	966.555	8.53333e-05	966.555	0.000241778	966.555	0.000417111	986.622	0.000493667
		969.9	0.000226222	969.9	0.000190333	969.9	0.000572778	969.9	0.000472111	969.9	0.000384222	969.9	8.33333e-05	969.9	0.000390778	969.9	0.000488111	989.967	0.000422667
		973.244	0.000280222	973.244	0.000216333	973.244	0.000520778	973.244	0.000520111	973.244	0.000335222	973.244	0.000130333	973.244	0.000235778	973.244	0.000587111	993.311	0.000344667
		976.589	0.000268222	976.589	0.000206333	976.589	0.000646778	976.589	0.000362111	976.589	0.000338222	976.589	0.000153333	976.589	0.000376778	976.589	0.000485111	996.656	0.000312667
		979.933	0.000298222	979.933	0.000236333	979.933	0.000527778	979.933	0.000369111	979.933	0.000262222	979.933	0.000198333	979.933	0.000293778	979.933	0.000517111	1000	0.000577667

## Sheet: Dataset 6
HgBr 20092021 16	HgBr 20092021 16	HgBr 20092021 17	HgBr 20092021 17	HgBr 20092021 18	HgBr 20092021 18	HgBr 20092021 19	HgBr 20092021 19	HgBr 20092021 20	HgBr 20092021 20	HgBr 20092021 21	HgBr 20092021 21	HgBr 20092021 22	HgBr 20092021 22
[O3]0/molecule cm-3	0	[O3]0/molecule cm-3	483174000000000	[O3]0/molecule cm-3	115449000000000	[O3]0/molecule cm-3	264079000000000	[O3]0/molecule cm-3	41341300000000	[O3]0/molecule cm-3	357565000000000	[O3]0/molecule cm-3	22000000000000
pf	0	pf	0.09	pf	0.09	pf	0.09	pf	0.09	pf	0.09	pf	0.09
t/us	HgBr LIF Signal	t/us	HgBr LIF Signal	t/us	HgBr LIF Signal	t/us	HgBr LIF Signal	t/us	HgBr LIF Signal	t/us	HgBr LIF Signal	t/us	HgBr LIF Signal
-2700	-4.11111e-06	-35	2.55556e-06	-90	-6e-06	-40	-1.15556e-05	-180	-1e-05	-40	-1.3e-05	-360	-1.03333e-05
-2400	-4.21111e-05	-31.5	4.55556e-06	-80	0	-36	-2.15556e-05	-160	-2e-05	-36	4.3e-05	-320	-8.33333e-06
-2100	4.88889e-06	-28	3.55556e-06	-70	2.1e-05	-32	-8.55556e-06	-140	1.3e-05	-32	-2.1e-05	-280	-1.93333e-05
-1800	3.08889e-05	-24.5	-2.74444e-05	-60	1.1e-05	-28	-2.55556e-05	-120	1.2e-05	-28	2e-05	-240	2.46667e-05
-1500	-2.21111e-05	-21	1.45556e-05	-50	-1.7e-05	-24	-2.95556e-05	-100	0	-24	-7e-06	-200	-6.33333e-06
-1200	3.88889e-06	-17.5	7.25556e-05	-40	8e-06	-20	3.44444e-05	-80	-4.3e-05	-20	1.3e-05	-160	2.56667e-05
-900	-3.01111e-05	-14	-3.44444e-06	-30	-7e-06	-16	3.74444e-05	-60	8e-06	-16	-3.1e-05	-120	-3.93333e-05
-600	3.88889e-05	-10.5	3.55556e-06	-20	-2e-06	-12	7.44444e-06	-40	4e-06	-12	5e-06	-80	1.66667e-05
-300	1.98889e-05	-7	-7.04444e-05	-10	-8e-06	-8	1.74444e-05	-20	3.6e-05	-8	-9e-06	-40	1.66667e-05
0	-1.01111e-05	-3.5	3.75556e-05	0	-1.3e-05	-4	5.44444e-06	0	4.7e-05	-4	2.3e-05	0	4.56667e-05
100.334	0.00506189	0	0.000488556	3.344	0.003297	0	0.000873444	6.689	0.003869	0	0.000829	13.378	0.00381967
200.669	0.00721589	1.171	0.00241156	6.689	0.004684	1.338	0.00343844	13.378	0.005708	1.338	0.003203	26.756	0.00598367
301.003	0.00721389	2.341	0.00343356	10.033	0.004435	2.676	0.00438144	20.067	0.00494	2.676	0.004285	40.134	0.00544767
401.338	0.00681989	3.512	0.00375556	13.378	0.004821	4.013	0.00352844	26.756	0.005303	4.013	0.003775	53.512	0.00542367
501.672	0.00661989	4.682	0.00296056	16.722	0.004277	5.351	0.00357344	33.445	0.005111	5.351	0.003885	66.89	0.00510667
602.007	0.00670789	5.853	0.00289456	20.067	0.004342	6.689	0.00384044	40.134	0.005049	6.689	0.003345	80.268	0.00508067
702.341	0.00660589	7.023	0.00316356	23.411	0.004138	8.027	0.00372944	46.823	0.004656	8.027	0.00343	93.645	0.00507867
802.676	0.00674789	8.194	0.00268456	26.756	0.003638	9.365	0.00348544	53.512	0.004753	9.365	0.00319	107.023	0.00480867
903.01	0.00597289	9.365	0.00258256	30.1	0.004033	10.702	0.00384644	60.201	0.00469	10.702	0.003017	120.401	0.00477467
1003.34	0.00707889	10.535	0.00252356	33.445	0.003326	12.04	0.00360744	66.89	0.004916	12.04	0.003028	133.779	0.00471067
1103.68	0.00683089	11.706	0.00268456	36.789	0.003762	13.378	0.00328344	73.579	0.004355	13.378	0.002938	147.157	0.00469167
1204.01	0.00614689	12.876	0.00248056	40.134	0.003706	14.716	0.00324044	80.268	0.004089	14.716	0.002804	160.535	0.00479167
1304.35	0.00627289	14.047	0.00252656	43.478	0.003267	16.054	0.00316744	86.957	0.004101	16.054	0.002614	173.913	0.00451067
1404.68	0.00599589	15.217	0.00202656	46.823	0.003253	17.391	0.00324944	93.645	0.003712	17.391	0.002299	187.291	0.00420867
1505.02	0.00581689	16.388	0.00210756	50.167	0.003152	18.729	0.00301944	100.334	0.003832	18.729	0.002395	200.669	0.00372667
1605.35	0.00605289	17.559	0.00208956	53.512	0.003249	20.067	0.00268244	107.023	0.003885	20.067	0.002269	214.047	0.00420967
1705.69	0.00571989	18.729	0.00179956	56.856	0.003144	21.405	0.00279744	113.712	0.003494	21.405	0.002522	227.425	0.00391067
1806.02	0.00585989	19.9	0.00174756	60.201	0.002914	22.742	0.00252844	120.401	0.003263	22.742	0.002283	240.803	0.00415267
1906.35	0.00596089	21.07	0.00181456	63.545	0.002609	24.08	0.00293844	127.09	0.003475	24.08	0.002019	254.181	0.00378967
2006.69	0.00624689	22.241	0.00161456	66.89	0.002605	25.418	0.00268844	133.779	0.003471	25.418	0.00217	267.559	0.00348567
2107.02	0.00558689	23.411	0.00175356	70.234	0.002575	26.756	0.00256444	140.468	0.003292	26.756	0.002032	280.936	0.00297867
2207.36	0.00600289	24.582	0.00140356	73.579	0.002573	28.094	0.00246344	147.157	0.003108	28.094	0.001884	294.314	0.00321067
2307.69	0.00592489	25.753	0.00150156	76.923	0.002636	29.431	0.00248444	153.846	0.003254	29.431	0.001727	307.692	0.00332367
2408.03	0.00523989	26.923	0.00146556	80.268	0.002556	30.769	0.00253744	160.535	0.003158	30.769	0.00191	321.07	0.00324267
2508.36	0.00540189	28.094	0.00142556	83.612	0.002617	32.107	0.00226644	167.224	0.003321	32.107	0.001654	334.448	0.00333067
2608.7	0.00572789	29.264	0.00142456	86.957	0.002296	33.445	0.00235944	173.913	0.00333	33.445	0.001553	347.826	0.00342867
2709.03	0.00553589	30.435	0.00110956	90.301	0.002104	34.783	0.00219744	180.602	0.002968	34.783	0.001359	361.204	0.00311467
2809.36	0.00536189	31.605	0.00127756	93.645	0.001997	36.12	0.00201544	187.291	0.002895	36.12	0.001402	374.582	0.00290867
2909.7	0.00527089	32.776	0.00116056	96.99	0.002124	37.458	0.00184944	193.98	0.002612	37.458	0.001388	387.96	0.00315267
3010.03	0.00528089	33.946	0.00126656	100.334	0.001989	38.796	0.00204244	200.669	0.002985	38.796	0.001232	401.338	0.00291267
3110.37	0.00489489	35.117	0.00107756	103.679	0.001976	40.134	0.00200344	207.358	0.00262	40.134	0.001434	414.716	0.00252767
3210.7	0.00483089	36.288	0.000984556	107.023	0.002027	41.472	0.00194444	214.047	0.00246	41.472	0.001268	428.094	0.00291567
3311.04	0.00502389	37.458	0.00119656	110.368	0.002187	42.809	0.00171444	220.736	0.002452	42.809	0.001075	441.472	0.00285067
3411.37	0.00502489	38.629	0.000758556	113.712	0.001791	44.147	0.00187044	227.425	0.002489	44.147	0.001384	454.849	0.00254567
3511.71	0.00526789	39.799	0.000859556	117.057	0.001692	45.485	0.00173144	234.114	0.00245	45.485	0.001188	468.227	0.00246767
3612.04	0.00527889	40.97	0.00102756	120.401	0.00153	46.823	0.00187444	240.803	0.00268	46.823	0.001221	481.605	0.00244567
3712.38	0.00519289	42.14	0.000838556	123.746	0.001592	48.161	0.00172844	247.492	0.00225	48.161	0.001018	494.983	0.00229867
3812.71	0.00487489	43.311	0.000913556	127.09	0.00135	49.498	0.00160244	254.181	0.002136	49.498	0.001146	508.361	0.00239067
3913.04	0.00481489	44.482	0.000842556	130.435	0.001663	50.836	0.00155544	260.87	0.002445	50.836	0.001048	521.739	0.00235267
4013.38	0.00479989	45.652	0.000785556	133.779	0.001496	52.174	0.00168144	267.559	0.002426	52.174	0.001032	535.117	0.00252267
4113.71	0.00531389	46.823	0.000751556	137.124	0.001479	53.512	0.00158544	274.247	0.002122	53.512	0.00104	548.495	0.00213667
4214.05	0.00449589	47.993	0.000762556	140.468	0.001445	54.849	0.00154044	280.936	0.002182	54.849	0.000911	561.873	0.00220167
4314.38	0.00491689	49.164	0.000714556	143.813	0.001401	56.187	0.00156744	287.625	0.001978	56.187	0.00077	575.251	0.00239167
4414.72	0.00520789	50.334	0.000586556	147.157	0.001394	57.525	0.00150444	294.314	0.001918	57.525	0.000803	588.629	0.00229567
4515.05	0.00479189	51.505	0.000709556	150.502	0.001417	58.863	0.00146944	301.003	0.002043	58.863	0.000789	602.007	0.00192167
4615.38	0.00478189	52.676	0.000708556	153.846	0.0013	60.201	0.00143344	307.692	0.001926	60.201	0.000641	615.385	0.00206667
4715.72	0.00430189	53.846	0.000533556	157.191	0.001272	61.538	0.00147544	314.381	0.001789	61.538	0.000962	628.763	0.00208867
4816.05	0.00484689	55.017	0.000603556	160.535	0.001403	62.876	0.00133944	321.07	0.001702	62.876	0.000628	642.14	0.00184367
4916.39	0.00439789	56.187	0.000561556	163.88	0.001122	64.214	0.00123644	327.759	0.001732	64.214	0.000688	655.518	0.00151967
5016.72	0.00493789	57.358	0.000590556	167.224	0.001138	65.552	0.00127344	334.448	0.001801	65.552	0.000684	668.896	0.00193967
5117.06	0.00461189	58.528	0.000655556	170.569	0.001302	66.89	0.00125244	341.137	0.001756	66.89	0.000613	682.274	0.00163867
5217.39	0.00473289	59.699	0.000636556	173.913	0.001178	68.227	0.00112644	347.826	0.001637	68.227	0.000747	695.652	0.00177367
5317.73	0.00452389	60.87	0.000418556	177.258	0.001116	69.565	0.00122244	354.515	0.001681	69.565	0.000756	709.03	0.00151067
5418.06	0.00466389	62.04	0.000687556	180.602	0.001076	70.903	0.00107644	361.204	0.001505	70.903	0.000711	722.408	0.00179467
5518.4	0.00451489	63.211	0.000395556	183.946	0.001044	72.241	0.00104644	367.893	0.001516	72.241	0.000592	735.786	0.00161567
5618.73	0.00464789	64.381	0.000447556	187.291	0.001026	73.579	0.00104644	374.582	0.001532	73.579	0.000618	749.164	0.00144867
5719.06	0.00432289	65.552	0.000506556	190.635	0.000924	74.916	0.00102144	381.271	0.001397	74.916	0.000595	762.542	0.00134867
5819.4	0.00410489	66.722	0.000437556	193.98	0.001058	76.254	0.000990444	387.96	0.001614	76.254	0.00061	775.92	0.00145267
5919.73	0.00434089	67.893	0.000343556	197.324	0.001086	77.592	0.000986444	394.649	0.00125	77.592	0.000645	789.298	0.00153667
6020.07	0.00414689	69.064	0.000370556	200.669	0.000989	78.93	0.000968444	401.338	0.0014	78.93	0.000595	802.676	0.00154867
6120.4	0.00453589	70.234	0.000512556	204.013	0.000907	80.268	0.000985444	408.027	0.001449	80.268	0.000479	816.054	0.00153967
6220.74	0.00409989	71.405	0.000376556	207.358	0.000737	81.605	0.000992444	414.716	0.001401	81.605	0.000635	829.431	0.00163167
6321.07	0.00419089	72.575	0.000322556	210.702	0.001087	82.943	0.000986444	421.405	0.001297	82.943	0.000644	842.809	0.00149167
6421.4	0.00457689	73.746	0.000343556	214.047	0.000814	84.281	0.000900444	428.094	0.001177	84.281	0.000505	856.187	0.00132367
6521.74	0.00451089	74.916	0.000376556	217.391	0.000688	85.619	0.00100344	434.783	0.001176	85.619	0.000516	869.565	0.00150667
6622.07	0.00458289	76.087	0.000319556	220.736	0.000763	86.957	0.000852444	441.472	0.001282	86.957	0.000372	882.943	0.00116367
6722.41	0.00441389	77.258	0.000344556	224.08	0.000691	88.294	0.000866444	448.161	0.001353	88.294	0.00046	896.321	0.00117267
6822.74	0.00404489	78.428	0.000438556	227.425	0.000816	89.632	0.000876444	454.849	0.001219	89.632	0.000463	909.699	0.00118467
6923.08	0.00444989	79.599	0.000365556	230.769	0.000703	90.97	0.000862444	461.538	0.001042	90.97	0.000544	923.077	0.00110267
7023.41	0.00405389	80.769	0.000375556	234.114	0.00075	92.308	0.000893444	468.227	0.001137	92.308	0.000429	936.455	0.00116667
7123.75	0.00412789	81.94	0.000355556	237.458	0.000749	93.645	0.000725444	474.916	0.001128	93.645	0.00046	949.833	0.00125167
7224.08	0.00397089	83.11	0.000365556	240.803	0.000732	94.983	0.000705444	481.605	0.001214	94.983	0.000481	963.211	0.00121267
7324.42	0.00390889	84.281	0.000383556	244.147	0.000653	96.321	0.000628444	488.294	0.000996	96.321	0.000369	976.589	0.00115167
7424.75	0.00397189	85.452	0.000324556	247.492	0.000698	97.659	0.000667444	494.983	0.001085	97.659	0.000302	989.967	0.00103067
7525.08	0.00394489	86.622	0.000276556	250.836	0.000697	98.997	0.000749444	501.672	0.001116	98.997	0.000455	1003.34	0.00111667
7625.42	0.00374889	87.793	0.000376556	254.181	0.000736	100.334	0.000669444	508.361	0.000977	100.334	0.000407	1016.72	0.000869667
7725.75	0.00422589	88.963	0.000384556	257.525	0.000623	101.672	0.000659444	515.05	0.001096	101.672	0.000375	1030.1	0.00111567
7826.09	0.00393989	90.134	0.000370556	260.87	0.000669	103.01	0.000712444	521.739	0.001034	103.01	0.000402	1043.48	0.00116667
7926.42	0.00386289	91.304	0.000270556	264.214	0.000675	104.348	0.000806444	528.428	0.00119	104.348	0.00042	1056.86	0.000869667
8026.76	0.00399289	92.475	0.000243556	267.559	0.000592	105.686	0.000611444	535.117	0.001075	105.686	0.000395	1070.23	0.000946667
8127.09	0.00391389	93.645	0.000253556	270.903	0.000632	107.023	0.000627444	541.806	0.000939	107.023	0.000386	1083.61	0.000971667
8227.42	0.00417089	94.816	0.000302556	274.247	0.000647	108.361	0.000700444	548.495	0.001098	108.361	0.000482	1096.99	0.000859667
8327.76	0.00371189	95.987	0.000302556	277.592	0.000629	109.699	0.000655444	555.184	0.000964	109.699	0.000394	1110.37	0.000847667
8428.09	0.00383189	97.157	0.000278556	280.936	0.000501	111.037	0.000735444	561.873	0.00091	111.037	0.000349	1123.75	0.00100167
8528.43	0.00368289	98.328	0.000148556	284.281	0.000628	112.375	0.000684444	568.562	0.000959	112.375	0.000412	1137.12	0.000801667
8628.76	0.00391189	99.498	0.000253556	287.625	0.000569	113.712	0.000584444	575.251	0.000926	113.712	0.000371	1150.5	0.000896667
8729.1	0.00359689	100.669	0.000235556	290.97	0.000434	115.05	0.000586444	581.94	0.000897	115.05	0.000292	1163.88	0.000820667
8829.43	0.00360389	101.839	0.000267556	294.314	0.000515	116.388	0.000591444	588.629	0.00085	116.388	0.000242	1177.26	0.000847667
8929.77	0.00353289	103.01	0.000332556	297.659	0.00047	117.726	0.000525444	595.318	0.000799	117.726	0.000341	1190.64	0.000834667
9030.1	0.00350589	104.181	0.000262556	301.003	0.000548	119.064	0.000534444	602.007	0.000925	119.064	0.000299	1204.01	0.000787667
9130.43	0.00316289	105.351	0.000207556	304.348	0.000455	120.401	0.000548444	608.696	0.000841	120.401	0.000265	1217.39	0.000764667
9230.77	0.00332089	106.522	0.000218556	307.692	0.000423	121.739	0.000569444	615.385	0.000867	121.739	0.000289	1230.77	0.000790667
9331.1	0.00371489	107.692	0.000169556	311.037	0.000535	123.077	0.000569444	622.074	0.000646	123.077	0.000417	1244.15	0.000832667
9431.44	0.00351889	108.863	0.000241556	314.381	0.000502	124.415	0.000501444	628.763	0.000923	124.415	0.000401	1257.53	0.000797667
9531.77	0.00351689	110.033	0.000301556	317.726	0.000402	125.753	0.000650444	635.452	0.00075	125.753	0.000265	1270.9	0.000788667
9632.11	0.00374389	111.204	0.000264556	321.07	0.000385	127.09	0.000542444	642.14	0.000717	127.09	0.000241	1284.28	0.000744667
9732.44	0.00349189	112.375	0.000184556	324.415	0.000438	128.428	0.000571444	648.829	0.000683	128.428	0.000327	1297.66	0.000701667
9832.78	0.00353589	113.545	0.000207556	327.759	0.000457	129.766	0.000613444	655.518	0.00076	129.766	0.000288	1311.04	0.000704667
9933.11	0.00330789	114.716	0.000195556	331.104	0.000439	131.104	0.000543444	662.207	0.00084	131.104	0.000316	1324.42	0.000705667
10033.4	0.00345689	115.886	0.000211556	334.448	0.000494	132.441	0.000455444	668.896	0.000693	132.441	0.000272	1337.79	0.000732667
10133.8	0.00334889	117.057	0.000171556	337.793	0.000351	133.779	0.000595444	675.585	0.000778	133.779	0.000291	1351.17	0.000752667
10234.1	0.00299989	118.227	0.000254556	341.137	0.000487	135.117	0.000407444	682.274	0.000671	135.117	0.00029	1364.55	0.000705667
10334.4	0.00349989	119.398	0.000207556	344.482	0.000418	136.455	0.000418444	688.963	0.000739	136.455	0.000253	1377.93	0.000625667
10434.8	0.00309389	120.569	0.000232556	347.826	0.000398	137.793	0.000420444	695.652	0.000545	137.793	0.000274	1391.3	0.000674667
10535.1	0.00311289	121.739	0.000201556	351.171	0.000371	139.13	0.000509444	702.341	0.000681	139.13	0.00029	1404.68	0.000656667
10635.5	0.00320689	122.91	0.000283556	354.515	0.000467	140.468	0.000524444	709.03	0.00067	140.468	0.000164	1418.06	0.000506667
10735.8	0.00306189	124.08	0.000269556	357.86	0.000412	141.806	0.000426444	715.719	0.000746	141.806	0.000243	1431.44	0.000575667
10836.1	0.00317989	125.251	0.000196556	361.204	0.000392	143.144	0.000488444	722.408	0.000645	143.144	0.000334	1444.82	0.000640667
10936.5	0.00323989	126.421	0.000301556	364.548	0.000385	144.482	0.000451444	729.097	0.000645	144.482	0.000275	1458.19	0.000686667
11036.8	0.00325889	127.592	0.000149556	367.893	0.000557	145.819	0.000327444	735.786	0.000539	145.819	0.000327	1471.57	0.000548667
11137.1	0.00315589	128.763	0.000331556	371.237	0.000363	147.157	0.000501444	742.475	0.00067	147.157	0.000318	1484.95	0.000509667
11237.5	0.00319989	129.933	0.000215556	374.582	0.0003	148.495	0.000481444	749.164	0.000594	148.495	0.000334	1498.33	0.000571667
11337.8	0.00314989	131.104	0.000200556	377.926	0.000324	149.833	0.000468444	755.853	0.000499	149.833	0.000325	1511.71	0.000485667
11438.1	0.00298389	132.274	0.000236556	381.271	0.000408	151.171	0.000378444	762.542	0.000526	151.171	0.000295	1525.08	0.000648667
11538.5	0.00280389	133.445	0.000236556	384.615	0.000447	152.508	0.000503444	769.231	0.000506	152.508	0.000245	1538.46	0.000546667
11638.8	0.00306289	134.615	0.000261556	387.96	0.000383	153.846	0.000424444	775.92	0.000543	153.846	0.000277	1551.84	0.000387667
11739.1	0.00327989	135.786	0.000243556	391.304	0.000411	155.184	0.000440444	782.609	0.000662	155.184	0.000263	1565.22	0.000508667
11839.5	0.00294289	136.957	0.000115556	394.649	0.000312	156.522	0.000321444	789.298	0.00063	156.522	0.000311	1578.59	0.000394667
11939.8	0.00282789	138.127	0.000283556	397.993	0.000337	157.86	0.000371444	795.987	0.000576	157.86	0.000343	1591.97	0.000529667
12040.1	0.00317189	139.298	0.000232556	401.338	0.000424	159.197	0.000428444	802.676	0.000555	159.197	0.00024	1605.35	0.000537667
12140.5	0.00311589	140.468	0.000171556	404.682	0.000367	160.535	0.000367444	809.365	0.000584	160.535	0.00035	1618.73	0.000575667
12240.8	0.00264589	141.639	0.000245556	408.027	0.000348	161.873	0.000339444	816.054	0.00063	161.873	0.000217	1632.11	0.000496667
12341.1	0.00307489	142.809	0.000171556	411.371	0.00035	163.211	0.000383444	822.742	0.000601	163.211	0.000231	1645.48	0.000618667
12441.5	0.00264989	143.98	0.000221556	414.716	0.000369	164.548	0.000475444	829.431	0.000508	164.548	0.000307	1658.86	0.000436667
12541.8	0.00294589	145.151	0.000170556	418.06	0.00032	165.886	0.000335444	836.12	0.000401	165.886	0.000292	1672.24	0.000409667
12642.1	0.00310389	146.321	0.000293556	421.405	0.00037	167.224	0.000259444	842.809	0.000417	167.224	0.000339	1685.62	0.000465667
12742.5	0.00261389	147.492	0.000186556	424.749	0.00035	168.562	0.000388444	849.498	0.000453	168.562	0.000297	1699	0.000426667
12842.8	0.00268789	148.662	0.000244556	428.094	0.000408	169.9	0.000431444	856.187	0.000554	169.9	0.000301	1712.38	0.000444667
12943.1	0.00294889	149.833	0.000294556	431.438	0.000241	171.237	0.000358444	862.876	0.000561	171.237	0.000285	1725.75	0.000456667
13043.5	0.00247289	151.003	0.000186556	434.783	0.000289	172.575	0.000292444	869.565	0.00059	172.575	0.000265	1739.13	0.000448667
13143.8	0.00283889	152.174	0.000174556	438.127	0.00029	173.913	0.000396444	876.254	0.00059	173.913	0.000312	1752.51	0.000500667
13244.1	0.00277389	153.344	0.000241556	441.472	0.000447	175.251	0.000389444	882.943	0.00052	175.251	0.000241	1765.89	0.000372667
13344.5	0.00264389	154.515	0.000195556	444.816	0.000365	176.589	0.000446444	889.632	0.000487	176.589	0.000194	1779.26	0.000452667
13444.8	0.00251989	155.686	0.000203556	448.161	0.000438	177.926	0.000319444	896.321	0.000453	177.926	0.000152	1792.64	0.000418667
13545.2	0.00281089	156.856	0.000204556	451.505	0.000367	179.264	0.000454444	903.01	0.000504	179.264	0.000242	1806.02	0.000455667
13645.5	0.00236989	158.027	0.000269556	454.849	0.000335	180.602	0.000308444	909.699	0.000356	180.602	0.000128	1819.4	0.000347667
13745.8	0.00276989	159.197	0.000239556	458.194	0.000258	181.94	0.000334444	916.388	0.000496	181.94	0.000192	1832.78	0.000396667
13846.2	0.00252389	160.368	0.000273556	461.538	0.000383	183.278	0.000335444	923.077	0.000368	183.278	0.000241	1846.15	0.000438667
13946.5	0.00266389	161.538	0.000242556	464.883	0.000258	184.615	0.000399444	929.766	0.000555	184.615	0.000288	1859.53	0.000441667
14046.8	0.00258889	162.709	0.000203556	468.227	0.000283	185.953	0.000367444	936.455	0.000343	185.953	0.000239	1872.91	0.000353667
14147.2	0.00254789	163.88	0.000238556	471.572	0.0003	187.291	0.000363444	943.144	0.000553	187.291	0.000217	1886.29	0.000417667
14247.5	0.00244989	165.05	0.000219556	474.916	0.000334	188.629	0.000308444	949.833	0.000473	188.629	0.000195	1899.67	0.000337667
14347.8	0.00253289	166.221	0.000182556	478.261	0.00034	189.967	0.000428444	956.522	0.000533	189.967	0.000271	1913.04	0.000368667
14448.2	0.00278189	167.391	0.000188556	481.605	0.000299	191.304	0.000346444	963.211	0.000357	191.304	0.000146	1926.42	0.000384667
14548.5	0.00274889	168.562	0.000277556	484.95	0.000287	192.642	0.000281444	969.9	0.000463	192.642	0.000244	1939.8	0.000240667
14648.8	0.00257989	169.732	0.000109556	488.294	0.000315	193.98	0.000308444	976.589	0.000337	193.98	0.000278	1953.18	0.000415667
14749.2	0.00239689	170.903	0.000252556	491.639	0.000306	195.318	0.000360444	983.278	0.000355	195.318	0.000249	1966.56	0.000284667
14849.5	0.00254289	172.074	0.000288556	494.983	0.000226	196.656	0.000293444	989.967	0.00034	196.656	0.000219	1979.93	0.000327667
14949.8	0.00239189	173.244	0.000212556	498.328	0.000334	197.993	0.000291444	996.656	0.000386	197.993	0.000218	1993.31	0.000267667
15050.2	0.00251489	174.415	0.000152556	501.672	0.00043	199.331	0.000244444	1003.34	0.000321	199.331	0.000281	2006.69	0.000376667
15150.5	0.00243189	175.585	0.000213556	505.017	0.00034	200.669	0.000297444	1010.03	0.000412	200.669	0.000226	2020.07	0.000306667
15250.8	0.00246189	176.756	0.000193556	508.361	0.000247	202.007	0.000289444	1016.72	0.000377	202.007	0.000233	2033.44	0.000356667
15351.2	0.00241289	177.926	0.000187556	511.706	0.000244	203.344	0.000324444	1023.41	0.000432	203.344	0.000191	2046.82	0.000308667
15451.5	0.00217989	179.097	0.000124556	515.05	0.000276	204.682	0.000197444	1030.1	0.000428	204.682	0.000156	2060.2	0.000361667
15551.8	0.00230589	180.268	0.000153556	518.395	0.00029	206.02	0.000270444	1036.79	0.000541	206.02	0.000186	2073.58	0.000337667
15652.2	0.00243489	181.438	0.000200556	521.739	0.00035	207.358	0.000306444	1043.48	0.000315	207.358	0.000233	2086.96	0.000402667
15752.5	0.00231389	182.609	0.000191556	525.084	0.000302	208.696	0.000327444	1050.17	0.000427	208.696	0.000207	2100.33	0.000291667
15852.8	0.00228389	183.779	0.000185556	528.428	0.000202	210.033	0.000266444	1056.86	0.000402	210.033	0.000168	2113.71	0.000251667
15953.2	0.00220289	184.95	0.000292556	531.773	0.000291	211.371	0.000353444	1063.55	0.000342	211.371	0.000184	2127.09	0.000260667
16053.5	0.00208989	186.12	0.000232556	535.117	0.000237	212.709	0.000372444	1070.23	0.000393	212.709	0.000165	2140.47	0.000274667
16153.8	0.00214789	187.291	0.000245556	538.462	0.000234	214.047	0.000352444	1076.92	0.000412	214.047	0.000197	2153.85	0.000381667
16254.2	0.00208289	188.462	0.000279556	541.806	0.000283	215.385	0.000306444	1083.61	0.00032	215.385	0.000179	2167.22	0.000333667
16354.5	0.00214889	189.632	0.000153556	545.151	0.000237	216.722	0.000196444	1090.3	0.000364	216.722	0.000262	2180.6	0.000285667
16454.8	0.00211289	190.803	0.000181556	548.495	0.000262	218.06	0.000264444	1096.99	0.000387	218.06	0.000175	2193.98	0.000327667
16555.2	0.00212289	191.973	0.000185556	551.839	0.00028	219.398	0.000279444	1103.68	0.000361	219.398	0.000273	2207.36	0.000297667
16655.5	0.00239889	193.144	0.000108556	555.184	0.000292	220.736	0.000335444	1110.37	0.000365	220.736	0.00022	2220.74	0.000368667
16755.9	0.00230189	194.314	0.000248556	558.528	0.000231	222.074	0.000301444	1117.06	0.000342	222.074	0.000188	2234.11	0.000380667
16856.2	0.00206389	195.485	0.000201556	561.873	0.000302	223.411	0.000227444	1123.75	0.000422	223.411	0.000194	2247.49	0.000364667
16956.5	0.00217589	196.656	0.000188556	565.217	0.000309	224.749	0.000181444	1130.44	0.000372	224.749	0.000217	2260.87	0.000250667
17056.9	0.00210289	197.826	0.000224556	568.562	0.000299	226.087	0.000280444	1137.12	0.000323	226.087	0.000192	2274.25	0.000235667
17157.2	0.00206089	198.997	0.000281556	571.906	0.00022	227.425	0.000328444	1143.81	0.00044	227.425	0.000159	2287.62	0.000209667
17257.5	0.00230589	200.167	0.000174556	575.251	0.000315	228.763	0.000262444	1150.5	0.00048	228.763	0.000253	2301	0.000300667
17357.9	0.00236389	201.338	0.000224556	578.595	0.000267	230.1	0.000289444	1157.19	0.000287	230.1	0.000335	2314.38	0.000152667
17458.2	0.00204889	202.508	0.000180556	581.94	0.000286	231.438	0.000339444	1163.88	0.000335	231.438	0.000228	2327.76	0.000370667
17558.5	0.00195189	203.679	0.000131556	585.284	0.000277	232.776	0.000253444	1170.57	0.000383	232.776	0.000229	2341.14	0.000259667
17658.9	0.00189789	204.849	0.000264556	588.629	0.000415	234.114	0.000243444	1177.26	0.00031	234.114	0.000264	2354.51	0.000305667
17759.2	0.00196289	206.02	0.000186556	591.973	0.000327	235.452	0.000277444	1183.95	0.00033	235.452	0.000224	2367.89	0.000302667
17859.5	0.00201389	207.191	0.000200556	595.318	0.000279	236.789	0.000351444	1190.64	0.000275	236.789	0.000169	2381.27	0.000270667
17959.9	0.00186389	208.361	0.000203556	598.662	0.000252	238.127	0.000350444	1197.32	0.000268	238.127	0.000232	2394.65	0.000328667
18060.2	0.00204189	209.532	0.000172556	602.007	0.000181	239.465	0.000228444	1204.01	0.000411	239.465	0.000166	2408.03	0.000289667
18160.5	0.00186889	210.702	0.000185556	605.351	0.000262	240.803	0.000237444	1210.7	0.000239	240.803	0.000209	2421.41	0.000243667
18260.9	0.00202389	211.873	0.000230556	608.696	0.000367	242.14	0.000263444	1217.39	0.000353	242.14	0.000234	2434.78	0.000240667
18361.2	0.00195089	213.043	0.000247556	612.04	0.000259	243.478	0.000343444	1224.08	0.000335	243.478	0.000217	2448.16	0.000267667
18461.5	0.00200689	214.214	0.000211556	615.385	0.000291	244.816	0.000285444	1230.77	0.000352	244.816	0.000229	2461.54	0.000204667
18561.9	0.00168989	215.385	0.000153556	618.729	0.000252	246.154	0.000290444	1237.46	0.000325	246.154	0.000176	2474.92	0.000318667
18662.2	0.00179789	216.555	0.000245556	622.074	0.000318	247.492	0.000266444	1244.15	0.000313	247.492	0.00027	2488.29	0.000251667
18762.5	0.00203389	217.726	0.000253556	625.418	0.00022	248.829	0.000303444	1250.84	0.00034	248.829	0.000254	2501.67	0.000298667
18862.9	0.00190589	218.896	0.000283556	628.763	0.000296	250.167	0.000215444	1257.53	0.000339	250.167	0.000231	2515.05	0.000233667
18963.2	0.00189689	220.067	0.000275556	632.107	0.000229	251.505	0.000258444	1264.21	0.000302	251.505	0.000215	2528.43	0.000242667
19063.5	0.00194789	221.237	0.000176556	635.452	0.000233	252.843	0.000309444	1270.9	0.000344	252.843	0.000259	2541.81	0.000306667
19163.9	0.00174389	222.408	0.000142556	638.796	0.000229	254.181	0.000270444	1277.59	0.000343	254.181	0.000279	2555.18	0.000286667
19264.2	0.00147989	223.579	0.000230556	642.14	0.000217	255.518	0.000305444	1284.28	0.000361	255.518	0.00026	2568.56	0.000246667
19364.5	0.00193689	224.749	0.000138556	645.485	0.000251	256.856	0.000269444	1290.97	0.000285	256.856	0.000245	2581.94	0.000319667
19464.9	0.00177189	225.92	0.000165556	648.829	0.000207	258.194	0.000267444	1297.66	0.000217	258.194	0.00022	2595.32	0.000217667
19565.2	0.00190689	227.09	0.000243556	652.174	0.000257	259.532	0.000245444	1304.35	0.000386	259.532	0.000221	2608.7	0.000303667
19665.6	0.00196189	228.261	0.000192556	655.518	0.000258	260.87	0.000165444	1311.04	0.00034	260.87	0.00019	2622.07	0.000100667
19765.9	0.00200489	229.431	0.000235556	658.863	0.000204	262.207	0.000182444	1317.73	0.000281	262.207	0.000244	2635.45	0.000350667
19866.2	0.00175589	230.602	0.000128556	662.207	0.000269	263.545	0.000190444	1324.42	0.000321	263.545	0.000156	2648.83	0.000207667
19966.6	0.00189889	231.773	0.000241556	665.552	0.000252	264.883	0.000290444	1331.1	0.0003	264.883	0.000195	2662.21	0.000181667
20066.9	0.00196589	232.943	0.000203556	668.896	0.000271	266.221	0.000209444	1337.79	0.000283	266.221	0.000245	2675.58	0.000196667
		234.114	0.000182556	672.241	0.000295	267.559	0.000204444	1344.48	0.000305	267.559	0.00026	2688.96	0.000127667
		235.284	0.000249556	675.585	0.000214	268.896	0.000231444	1351.17	0.000258	268.896	0.000177	2702.34	0.000170667
		236.455	0.000141556	678.93	0.00021	270.234	0.000304444	1357.86	0.000338	270.234	0.000147	2715.72	0.000229667
		237.625	0.000163556	682.274	0.000307	271.572	0.000243444	1364.55	0.000277	271.572	0.00019	2729.1	0.000171667
		238.796	0.000180556	685.619	0.000255	272.91	0.000204444	1371.24	0.000279	272.91	0.000206	2742.48	0.000196667
		239.967	0.000181556	688.963	0.000239	274.247	0.000243444	1377.93	0.000265	274.247	0.000179	2755.85	0.000217667
		241.137	0.000278556	692.308	0.00032	275.585	0.000276444	1384.61	0.000301	275.585	0.0002	2769.23	0.000148667
		242.308	0.000141556	695.652	0.000232	276.923	0.000292444	1391.3	0.000325	276.923	0.00022	2782.61	0.000260667
		243.478	0.000178556	698.997	0.000275	278.261	0.000206444	1397.99	0.000285	278.261	0.000362	2795.99	0.000241667
		244.649	0.000170556	702.341	0.000307	279.599	0.000265444	1404.68	0.000325	279.599	0.000183	2809.36	0.000206667
		245.819	0.000263556	705.686	0.000268	280.936	0.000260444	1411.37	0.000313	280.936	0.000217	2822.74	0.000187667
		246.99	0.000151556	709.03	0.00029	282.274	0.000241444	1418.06	0.000363	282.274	0.000228	2836.12	0.000242667
		248.161	0.000162556	712.375	0.000316	283.612	0.000292444	1424.75	0.000367	283.612	0.000254	2849.5	0.000270667
		249.331	0.000160556	715.719	0.000269	284.95	0.000232444	1431.44	0.000351	284.95	0.000215	2862.88	0.000145667
		250.502	0.000197556	719.064	0.000204	286.288	0.000222444	1438.13	0.000307	286.288	0.000184	2876.25	0.000188667
		251.672	0.000224556	722.408	0.00029	287.625	0.000240444	1444.82	0.000276	287.625	0.000191	2889.63	0.000198667
		252.843	0.000183556	725.753	0.000194	288.963	0.000247444	1451.51	0.000238	288.963	0.000208	2903.01	0.000171667
		254.013	0.000192556	729.097	0.000221	290.301	0.000301444	1458.19	0.00029	290.301	0.000181	2916.39	0.000159667
		255.184	0.000259556	732.441	0.000191	291.639	0.000164444	1464.88	0.000304	291.639	0.000165	2929.77	0.000208667
		256.355	0.000159556	735.786	0.000154	292.977	0.000238444	1471.57	0.000306	292.977	0.000159	2943.14	0.000141667
		257.525	0.000222556	739.13	0.00025	294.314	0.000167444	1478.26	0.000247	294.314	0.000167	2956.52	0.000268667
		258.696	0.000225556	742.475	0.000308	295.652	0.000164444	1484.95	0.000307	295.652	0.000196	2969.9	0.000154667
		259.866	0.000147556	745.819	0.000251	296.99	0.000178444	1491.64	0.000451	296.99	0.000192	2983.28	0.000176667
		261.037	0.000238556	749.164	0.000176	298.328	0.000215444	1498.33	0.000303	298.328	0.000162	2996.66	0.000172667
		262.207	0.000165556	752.508	0.000257	299.666	0.000285444	1505.02	0.00027	299.666	0.000147	3010.03	0.000235667
		263.378	0.000133556	755.853	0.000259	301.003	0.000335444	1511.71	0.000323	301.003	0.000221	3023.41	0.000155667
		264.548	0.000161556	759.197	0.000191	302.341	0.000277444	1518.4	0.000277	302.341	0.000177	3036.79	0.000204667
		265.719	0.000161556	762.542	0.000301	303.679	0.000285444	1525.08	0.000207	303.679	0.000201	3050.17	0.000174667
		266.89	0.000134556	765.886	0.000287	305.017	0.000262444	1531.77	0.000294	305.017	0.000201	3063.54	0.000190667
		268.06	0.000207556	769.231	0.000227	306.355	0.000337444	1538.46	0.000232	306.355	0.000175	3076.92	0.000242667
		269.231	0.000157556	772.575	0.00022	307.692	0.000225444	1545.15	0.00029	307.692	0.000176	3090.3	0.000190667
		270.401	0.000206556	775.92	0.00026	309.03	0.000255444	1551.84	0.000265	309.03	0.000218	3103.68	0.000231667
		271.572	0.000196556	779.264	0.000195	310.368	0.000370444	1558.53	0.000217	310.368	0.000179	3117.06	0.000227667
		272.742	0.000150556	782.609	0.000204	311.706	0.000298444	1565.22	0.000266	311.706	0.000226	3130.44	0.000268667
		273.913	0.000112556	785.953	0.000309	313.043	0.000251444	1571.91	0.000296	313.043	0.00016	3143.81	0.000178667
		275.084	0.000100556	789.298	0.000242	314.381	0.000215444	1578.59	0.000285	314.381	0.000267	3157.19	0.000248667
		276.254	0.000165556	792.642	0.000331	315.719	0.000255444	1585.28	0.000403	315.719	0.000164	3170.57	0.000188667
		277.425	0.000167556	795.987	0.00022	317.057	0.000287444	1591.97	0.000264	317.057	0.000334	3183.95	0.000228667
		278.595	0.000154556	799.331	0.000202	318.395	0.000250444	1598.66	0.000324	318.395	0.00018	3197.32	0.000218667
		279.766	9.55556e-05	802.676	0.000205	319.732	0.000307444	1605.35	0.000279	319.732	0.000225	3210.7	0.000264667
		280.936	0.000142556	806.02	0.000252	321.07	0.000231444	1612.04	0.000328	321.07	0.000247	3224.08	0.000154667
		282.107	0.000278556	809.365	0.000217	322.408	0.000255444	1618.73	0.000171	322.408	0.000189	3237.46	0.000150667
		283.278	0.000157556	812.709	0.000314	323.746	0.000335444	1625.42	0.000342	323.746	0.000263	3250.84	0.000213667
		284.448	0.000196556	816.054	0.000289	325.084	0.000230444	1632.11	0.000195	325.084	0.000246	3264.21	0.000169667
		285.619	0.000226556	819.398	0.000207	326.421	0.000175444	1638.8	0.000252	326.421	0.000219	3277.59	0.000209667
		286.789	0.000184556	822.742	0.000207	327.759	0.000231444	1645.48	0.000211	327.759	0.00021	3290.97	0.000172667
		287.96	0.000173556	826.087	0.000313	329.097	0.000213444	1652.17	0.000203	329.097	0.000258	3304.35	0.000140667
		289.13	0.000184556	829.431	0.000217	330.435	0.000243444	1658.86	0.000282	330.435	0.000162	3317.73	0.000149667
		290.301	0.000158556	832.776	0.00032	331.773	0.000166444	1665.55	0.000226	331.773	0.000213	3331.1	0.000171667
		291.472	0.000212556	836.12	0.000203	333.11	0.000192444	1672.24	0.000217	333.11	0.000227	3344.48	0.000133667
		292.642	0.000174556	839.465	0.000227	334.448	0.000280444	1678.93	0.000235	334.448	0.00025	3357.86	0.000225667
		293.813	0.000180556	842.809	0.000169	335.786	0.000207444	1685.62	0.000244	335.786	0.000189	3371.24	0.000225667
		294.983	0.000241556	846.154	0.000295	337.124	0.000107444	1692.31	0.000238	337.124	0.000332	3384.61	0.000218667
		296.154	0.000184556	849.498	0.000175	338.462	0.000310444	1699	0.000207	338.462	0.000129	3397.99	0.000169667
		297.324	0.000146556	852.843	0.0003	339.799	0.000197444	1705.69	0.000183	339.799	0.00018	3411.37	0.000214667
		298.495	0.000105556	856.187	0.000222	341.137	0.000249444	1712.38	0.000182	341.137	0.000196	3424.75	0.000167667
		299.666	0.000167556	859.532	0.000211	342.475	0.000219444	1719.06	0.000262	342.475	0.000155	3438.13	0.000146667
		300.836	0.000109556	862.876	0.0002	343.813	0.000266444	1725.75	0.000255	343.813	0.000152	3451.5	0.000142667
		302.007	0.000204556	866.221	0.000283	345.151	0.000188444	1732.44	0.00028	345.151	0.000187	3464.88	0.000173667
		303.177	0.000208556	869.565	0.000238	346.488	0.000283444	1739.13	0.000242	346.488	0.000165	3478.26	6.36667e-05
		304.348	0.000170556	872.91	0.000274	347.826	0.000238444	1745.82	0.000247	347.826	0.000214	3491.64	0.000133667
		305.518	0.000139556	876.254	0.000238	349.164	0.000216444	1752.51	0.000288	349.164	0.000216	3505.02	0.000199667
		306.689	0.000261556	879.599	0.000248	350.502	0.000227444	1759.2	0.000321	350.502	0.00024	3518.4	0.000156667
		307.86	0.000202556	882.943	0.000251	351.839	0.000212444	1765.89	0.000213	351.839	0.000195	3531.77	0.000183667
		309.03	0.000184556	886.288	0.000195	353.177	0.000287444	1772.57	0.000263	353.177	0.000227	3545.15	0.000146667
		310.201	0.000224556	889.632	0.000195	354.515	0.000210444	1779.26	0.000208	354.515	0.000253	3558.53	7.46667e-05
		311.371	0.000278556	892.977	0.000207	355.853	0.000256444	1785.95	0.000317	355.853	0.000216	3571.91	0.000186667
		312.542	0.000108556	896.321	0.000234	357.191	0.000231444	1792.64	0.000265	357.191	0.000252	3585.28	0.000198667
		313.712	0.000227556	899.666	0.000303	358.528	0.000177444	1799.33	0.000242	358.528	0.000234	3598.66	0.000172667
		314.883	0.000248556	903.01	0.000287	359.866	0.000252444	1806.02	0.000177	359.866	0.000236	3612.04	0.000210667
		316.054	0.000173556	906.355	0.000303	361.204	0.000251444	1812.71	0.000207	361.204	0.000219	3625.42	0.000177667
		317.224	0.000174556	909.699	0.000199	362.542	0.000245444	1819.4	0.00022	362.542	0.000211	3638.8	0.000100667
		318.395	0.000203556	913.043	0.00025	363.88	0.000285444	1826.09	0.000279	363.88	0.000179	3652.17	0.000213667
		319.565	0.000196556	916.388	0.000227	365.217	0.000235444	1832.78	0.000241	365.217	0.000124	3665.55	0.000122667
		320.736	0.000142556	919.732	0.000258	366.555	0.000244444	1839.46	0.000255	366.555	0.000169	3678.93	0.000124667
		321.906	0.000221556	923.077	0.000204	367.893	0.000221444	1846.15	0.000215	367.893	0.000241	3692.31	0.000204667
		323.077	0.000180556	926.421	0.000332	369.231	0.000233444	1852.84	0.000266	369.231	0.000189	3705.69	0.000144667
		324.247	0.000146556	929.766	0.000241	370.569	0.000279444	1859.53	0.000325	370.569	0.000183	3719.06	0.000188667
		325.418	0.000115556	933.11	0.000206	371.906	0.000242444	1866.22	0.000272	371.906	0.000233	3732.44	0.000118667
		326.589	0.000260556	936.455	0.00016	373.244	0.000127444	1872.91	0.000317	373.244	0.000174	3745.82	0.000169667
		327.759	0.000210556	939.799	0.000174	374.582	0.000285444	1879.6	0.000244	374.582	0.000158	3759.2	0.000252667
		328.93	8.75556e-05	943.144	0.000211	375.92	0.000200444	1886.29	0.000116	375.92	0.000226	3772.57	0.000135667
		330.1	0.000247556	946.488	0.000239	377.258	0.000216444	1892.98	0.000261	377.258	0.000212	3785.95	0.000189667
		331.271	9.65556e-05	949.833	0.000193	378.595	0.000243444	1899.67	0.000242	378.595	0.000232	3799.33	0.000167667
		332.441	0.000177556	953.177	0.000206	379.933	0.000251444	1906.35	0.000212	379.933	0.000172	3812.71	0.000185667
		333.612	0.000138556	956.522	0.000246	381.271	0.000300444	1913.04	0.000246	381.271	0.000148	3826.09	0.000166667
		334.783	0.000140556	959.866	0.000266	382.609	0.000265444	1919.73	0.000176	382.609	0.000212	3839.47	0.000102667
		335.953	0.000151556	963.211	0.000206	383.946	0.000154444	1926.42	0.000198	383.946	0.000145	3852.84	0.000142667
		337.124	0.000234556	966.555	0.000298	385.284	0.000251444	1933.11	0.000228	385.284	0.00026	3866.22	0.000153667
		338.294	0.000192556	969.9	0.000249	386.622	0.000193444	1939.8	0.000144	386.622	0.00014	3879.6	0.000154667
		339.465	0.000147556	973.244	0.000255	387.96	0.000210444	1946.49	0.000213	387.96	0.000235	3892.98	8.46667e-05
		340.635	0.000165556	976.589	0.000178	389.298	0.000224444	1953.18	0.000338	389.298	0.000123	3906.35	0.000126667
		341.806	0.000156556	979.933	0.000234	390.635	0.000166444	1959.87	0.000136	390.635	0.000222	3919.73	0.000166667
		342.977	0.000250556	983.278	0.000224	391.973	0.000325444	1966.56	0.000246	391.973	0.000172	3933.11	0.000136667
		344.147	0.000220556	986.622	0.000202	393.311	0.000165444	1973.24	0.000256	393.311	0.000147	3946.49	0.000154667
		345.318	0.000177556	989.967	0.000142	394.649	0.000237444	1979.93	0.000203	394.649	0.000189	3959.87	0.000174667
		346.488	0.000222556	993.311	0.000214	395.987	0.000241444	1986.62	0.000283	395.987	0.000175	3973.24	0.000128667
		347.659	0.000164556	996.656	0.000201	397.324	0.000186444	1993.31	0.000215	397.324	0.000241	3986.62	0.000228667
		348.829	0.000152556	1000	0.000183	398.662	0.000229444	2000	0.000189	398.662	0.000169	4000	0.000205667

## Sheet: Dataset 7
HgBr 20092021 1	HgBr 20092021 1	HgBr 20092021 2	HgBr 20092021 2	HgBr 20092021 3	HgBr 20092021 3	HgBr 20092021 4	HgBr 20092021 4	HgBr 20092021 5	HgBr 20092021 5	HgBr 20092021 6	HgBr 20092021 6	HgBr 20092021 7	HgBr 20092021 7
[O3]0/molecule cm-3	0	[O3]0/molecule cm-3	450000000000000	[O3]0/molecule cm-3	109000000000000	[O3]0/molecule cm-3	240000000000000	[O3]0/molecule cm-3	45900000000000	[O3]0/molecule cm-3	335000000000000	[O3]0/molecule cm-3	18000000000000
pf	0.21	pf	0.21	pf	0.21	pf	0.21	pf	0.21	pf	0.21	pf	0.21
t/us	HgBr LIF Signal	t/us	HgBr LIF Signal	t/us	HgBr LIF Signal	t/us	HgBr LIF Signal	t/us	HgBr LIF Signal	t/us	HgBr LIF Signal	t/us	HgBr LIF Signal
-3000	-0.000185222	-50	0.000391556	-80	0.000762556	-70	0.000513556	-130	0.000702667	-50	0.000367444	-400	0.000503333
-2700	-6.82222e-05	-45	5.55556e-06	-72	-2.04444e-05	-63	-2.24444e-05	-117	-5.33333e-06	-45	2.34444e-05	-360	1.23333e-05
-2400	7.87778e-05	-40	9.55556e-06	-64	-4.44444e-07	-56	-2.94444e-05	-104	1.86667e-05	-40	-3.25556e-05	-320	6.33333e-06
-2100	6.87778e-05	-35	-5.44444e-06	-56	2.35556e-05	-49	-2.14444e-05	-91	-3.73333e-05	-35	-1.35556e-05	-280	2.33333e-05
-1800	7.77778e-05	-30	2.65556e-05	-48	-1.44444e-05	-42	-1.34444e-05	-78	3.66667e-06	-30	4.54444e-05	-240	-3.66667e-06
-1500	-2.12222e-05	-25	5.55556e-06	-40	1.35556e-05	-35	2.55556e-06	-65	-1.83333e-05	-25	8.44444e-06	-200	-1.56667e-05
-1200	7.97778e-05	-20	1.05556e-05	-32	5.55556e-06	-28	1.85556e-05	-52	3.66667e-06	-20	-3.35556e-05	-160	-1.06667e-05
-900	-4.02222e-05	-15	-3.94444e-05	-24	1.55556e-06	-21	-4.44444e-07	-39	2.86667e-05	-15	5.44444e-06	-120	-9.66667e-06
-600	9.77778e-06	-10	-2.14444e-05	-16	-1.74444e-05	-14	3.55556e-05	-26	8.66667e-06	-10	-1.05556e-05	-80	-8.66667e-06
-300	-7.92222e-05	-5	8.55556e-06	-8	8.55556e-06	-7	3.05556e-05	-13	-2.33333e-06	-5	7.44444e-06	-40	6.33333e-06
0	0.0419708	0	-3.74444e-05	0	2.35556e-05	0	6.55556e-06	0	3.76667e-05	0	-1.15556e-05	0	3.83333e-05
100.334	0.0614418	1.672	0.00947656	2.676	0.0157776	2.341	0.0128876	4.348	0.0196527	1.672	0.00816944	13.378	0.0223783
200.669	0.0624068	3.344	0.0175766	5.351	0.0244066	4.682	0.0179456	8.696	0.0293837	3.344	0.0165584	26.756	0.0333623
301.003	0.0597688	5.017	0.0212066	8.027	0.0217166	7.023	0.0202456	13.043	0.0293067	5.017	0.0176774	40.134	0.0318663
401.338	0.0588588	6.689	0.0200976	10.702	0.0229296	9.365	0.0195676	17.391	0.0282617	6.689	0.0149254	53.512	0.0312323
501.672	0.0608308	8.361	0.0187616	13.378	0.0205376	11.706	0.0187696	21.739	0.0266427	8.361	0.0167224	66.89	0.0294633
602.007	0.0586288	10.033	0.0160946	16.054	0.0216416	14.047	0.0159076	26.087	0.0242307	10.033	0.0156814	80.268	0.0308863
702.341	0.0576668	11.706	0.0161376	18.729	0.0196766	16.388	0.0163226	30.435	0.0265637	11.706	0.0158074	93.645	0.0306023
802.676	0.0553068	13.378	0.0166316	21.405	0.0219216	18.729	0.0143456	34.783	0.0258087	13.378	0.0153274	107.023	0.0299303
903.01	0.0592908	15.05	0.0145246	24.08	0.0201386	21.07	0.0142766	39.13	0.0252807	15.05	0.0137654	120.401	0.0300893
1003.34	0.0571248	16.722	0.0141866	26.756	0.0187576	23.411	0.0135876	43.478	0.0251987	16.722	0.0144604	133.779	0.0287183
1103.68	0.0570328	18.395	0.0145886	29.431	0.0182306	25.753	0.0143466	47.826	0.0242787	18.395	0.0121604	147.157	0.0267363
1204.01	0.0548378	20.067	0.0130476	32.107	0.0174036	28.094	0.0136026	52.174	0.0250627	20.067	0.0124904	160.535	0.0274013
1304.35	0.0539698	21.739	0.0123196	34.783	0.0179396	30.435	0.0123246	56.522	0.0250307	21.739	0.0116594	173.913	0.0277923
1404.68	0.0541698	23.411	0.0113496	37.458	0.0154526	32.776	0.0136486	60.87	0.0231337	23.411	0.0119564	187.291	0.0261063
1505.02	0.0531718	25.084	0.0110686	40.134	0.0176206	35.117	0.0113446	65.217	0.0232557	25.084	0.0111464	200.669	0.0259723
1605.35	0.0537978	26.756	0.0104896	42.809	0.0171896	37.458	0.0120396	69.565	0.0234147	26.756	0.0106294	214.047	0.0272153
1705.69	0.0509408	28.428	0.0102126	45.485	0.0179736	39.799	0.0118956	73.913	0.0226277	28.428	0.0107594	227.425	0.0256903
1806.02	0.0504628	30.1	0.00985956	48.161	0.0168016	42.14	0.0117936	78.261	0.0236807	30.1	0.00935044	240.803	0.0239463
1906.35	0.0519688	31.773	0.0102396	50.836	0.0158496	44.482	0.0102156	82.609	0.0216987	31.773	0.00968744	254.181	0.0256253
2006.69	0.0490598	33.445	0.00935056	53.512	0.0157006	46.823	0.0101596	86.957	0.0226317	33.445	0.00964144	267.559	0.0242383
2107.02	0.0471278	35.117	0.00882056	56.187	0.0148776	49.164	0.0107526	91.304	0.0222637	35.117	0.00898544	280.936	0.0232343
2207.36	0.0510488	36.789	0.00852856	58.863	0.0139216	51.505	0.00996056	95.652	0.0205957	36.789	0.00831344	294.314	0.0228223
2307.69	0.0478388	38.462	0.00878856	61.538	0.0148226	53.846	0.00905556	100	0.0214067	38.462	0.00858844	307.692	0.0222023
2408.03	0.0471018	40.134	0.00790756	64.214	0.0138536	56.187	0.00894856	104.348	0.0207557	40.134	0.00758944	321.07	0.0222843
2508.36	0.0501208	41.806	0.00814156	66.89	0.0146866	58.528	0.00997556	108.696	0.0194057	41.806	0.00805744	334.448	0.0211113
2608.7	0.0467288	43.478	0.00771856	69.565	0.0139016	60.87	0.00885456	113.043	0.0200747	43.478	0.00791244	347.826	0.0222713
2709.03	0.0462108	45.151	0.00708756	72.241	0.0129336	63.211	0.00891456	117.391	0.0203867	45.151	0.00707744	361.204	0.0213063
2809.36	0.0448178	46.823	0.00726956	74.916	0.0133096	65.552	0.00911756	121.739	0.0202877	46.823	0.00813544	374.582	0.0207563
2909.7	0.0475888	48.495	0.00639256	77.592	0.0120176	67.893	0.00759356	126.087	0.0183487	48.495	0.00706344	387.96	0.0200443
3010.03	0.0446688	50.167	0.00675956	80.268	0.0132186	70.234	0.00764656	130.435	0.0201367	50.167	0.00710344	401.338	0.0198513
3110.37	0.0450828	51.839	0.00713556	82.943	0.0129896	72.575	0.00781956	134.783	0.0200467	51.839	0.00694244	414.716	0.0186963
3210.7	0.0441528	53.512	0.00726756	85.619	0.0127826	74.916	0.00707656	139.13	0.0180917	53.512	0.00669044	428.094	0.0193603
3311.04	0.0419028	55.184	0.00670756	88.294	0.0119306	77.258	0.00691956	143.478	0.0193487	55.184	0.00691044	441.472	0.0176653
3411.37	0.0446988	56.856	0.00646156	90.97	0.0123016	79.599	0.00749056	147.826	0.0192267	56.856	0.00678944	454.849	0.0181613
3511.71	0.0439378	58.528	0.00616656	93.645	0.0122516	81.94	0.00736956	152.174	0.0171847	58.528	0.00621544	468.227	0.0188003
3612.04	0.0446328	60.201	0.00597756	96.321	0.0116716	84.281	0.00698356	156.522	0.0164427	60.201	0.00656744	481.605	0.0178033
3712.38	0.0422288	61.873	0.00595256	98.997	0.0114776	86.622	0.00708256	160.87	0.0181487	61.873	0.00632544	494.983	0.0186853
3812.71	0.0431148	63.545	0.00619656	101.672	0.0112706	88.963	0.00636456	165.217	0.0164517	63.545	0.00591044	508.361	0.0179883
3913.04	0.0431238	65.217	0.00631656	104.348	0.0113516	91.304	0.00683656	169.565	0.0171577	65.217	0.00545144	521.739	0.0164803
4013.38	0.0419198	66.89	0.00621756	107.023	0.0112166	93.645	0.00596256	173.913	0.0158867	66.89	0.00639344	535.117	0.0176443
4113.71	0.0427008	68.562	0.00554756	109.699	0.00971856	95.987	0.00602256	178.261	0.0166617	68.562	0.00578044	548.495	0.0169133
4214.05	0.0416428	70.234	0.00530256	112.375	0.0107526	98.328	0.00639856	182.609	0.0171227	70.234	0.00585944	561.873	0.0145633
4314.38	0.0441618	71.906	0.00552156	115.05	0.0104816	100.669	0.00595356	186.957	0.0161577	71.906	0.00526644	575.251	0.0158993
4414.72	0.0413208	73.579	0.00550556	117.726	0.0104526	103.01	0.00544356	191.304	0.0158287	73.579	0.00527344	588.629	0.0155253
4515.05	0.0408078	75.251	0.00569656	120.401	0.00955056	105.351	0.00572456	195.652	0.0160587	75.251	0.00551744	602.007	0.0151223
4615.38	0.0419548	76.923	0.00547056	123.077	0.00981356	107.692	0.00535956	200	0.0161817	76.923	0.00501644	615.385	0.0157753
4715.72	0.0425348	78.595	0.00542456	125.753	0.00982756	110.033	0.00547056	204.348	0.0153777	78.595	0.00528744	628.763	0.0150303
4816.05	0.0411808	80.268	0.00515456	128.428	0.00979156	112.375	0.00615656	208.696	0.0158947	80.268	0.00494544	642.14	0.0147493
4916.39	0.0415788	81.94	0.00549456	131.104	0.00872656	114.716	0.00536356	213.043	0.0146677	81.94	0.00511344	655.518	0.0145043
5016.72	0.0387488	83.612	0.00496256	133.779	0.00958256	117.057	0.00543056	217.391	0.0150707	83.612	0.00525544	668.896	0.0135823
5117.06	0.0377368	85.284	0.00485156	136.455	0.00925656	119.398	0.00518256	221.739	0.0145457	85.284	0.00503044	682.274	0.0128553
5217.39	0.0372128	86.957	0.00485756	139.13	0.00982356	121.739	0.00505456	226.087	0.0145547	86.957	0.00467744	695.652	0.0131793
5317.73	0.0399878	88.629	0.00497856	141.806	0.00893356	124.08	0.00549856	230.435	0.0156407	88.629	0.00513344	709.03	0.0142433
5418.06	0.0395898	90.301	0.00486756	144.482	0.00844356	126.421	0.00507456	234.783	0.0146377	90.301	0.00490244	722.408	0.0138323
5518.4	0.0381898	91.973	0.00469956	147.157	0.00896356	128.763	0.00477056	239.13	0.0133047	91.973	0.00435844	735.786	0.0121663
5618.73	0.0384668	93.645	0.00435056	149.833	0.00830656	131.104	0.00522456	243.478	0.0145867	93.645	0.00474244	749.164	0.0122533
5719.06	0.0382478	95.318	0.00482856	152.508	0.00856956	133.445	0.00526856	247.826	0.0136277	95.318	0.00402944	762.542	0.0127933
5819.4	0.0371588	96.99	0.00488856	155.184	0.00796056	135.786	0.00511056	252.174	0.0137417	96.99	0.00403744	775.92	0.0129313
5919.73	0.0381628	98.662	0.00474556	157.86	0.00809856	138.127	0.00525456	256.522	0.0141847	98.662	0.00458844	789.298	0.0131593
6020.07	0.0382008	100.334	0.00503856	160.535	0.00810356	140.468	0.00493556	260.87	0.0141317	100.334	0.00439744	802.676	0.0116133
6120.4	0.0365638	102.007	0.00478056	163.211	0.00729256	142.809	0.00508056	265.217	0.0142637	102.007	0.00439544	816.054	0.0117583
6220.74	0.0379518	103.679	0.00460556	165.886	0.00809556	145.151	0.00480356	269.565	0.0131127	103.679	0.00379844	829.431	0.0112413
6321.07	0.0363318	105.351	0.00422656	168.562	0.00709956	147.492	0.00461556	273.913	0.0129817	105.351	0.00461844	842.809	0.0112993
6421.4	0.0367198	107.023	0.00448556	171.237	0.00781356	149.833	0.00466756	278.261	0.0130227	107.023	0.00445844	856.187	0.0107733
6521.74	0.0367598	108.696	0.00438456	173.913	0.00694056	152.174	0.00424656	282.609	0.0120757	108.696	0.00480344	869.565	0.0111853
6622.07	0.0344588	110.368	0.00414156	176.589	0.00792856	154.515	0.00454856	286.957	0.0129437	110.368	0.00438244	882.943	0.0111563
6722.41	0.0356518	112.04	0.00470556	179.264	0.00785156	156.856	0.00440456	291.304	0.0130417	112.04	0.00391944	896.321	0.0110133
6822.74	0.0362288	113.712	0.00400156	181.94	0.00768056	159.197	0.00436056	295.652	0.0131237	113.712	0.00374244	909.699	0.0113913
6923.08	0.0356668	115.385	0.00460056	184.615	0.00787056	161.538	0.00469456	300	0.0121157	115.385	0.00376044	923.077	0.0113563
7023.41	0.0350468	117.057	0.00383856	187.291	0.00685156	163.88	0.00433556	304.348	0.0122567	117.057	0.00401144	936.455	0.00949833
7123.75	0.0345548	118.729	0.00424056	189.967	0.00675856	166.221	0.00446356	308.696	0.0115617	118.729	0.00407944	949.833	0.0102583
7224.08	0.0355978	120.401	0.00436056	192.642	0.00708556	168.562	0.00481256	313.043	0.0122907	120.401	0.00417744	963.211	0.0101133
7324.42	0.0344918	122.074	0.00415756	195.318	0.00656956	170.903	0.00413056	317.391	0.0122987	122.074	0.00424344	976.589	0.00995933
7424.75	0.0344628	123.746	0.00414956	197.993	0.00735256	173.244	0.00407456	321.739	0.0120707	123.746	0.00400644	989.967	0.0100033
7525.08	0.0350788	125.418	0.00404756	200.669	0.00725856	175.585	0.00432356	326.087	0.0121077	125.418	0.00366744	1003.34	0.00948833
7625.42	0.0321948	127.09	0.00464056	203.344	0.00635056	177.926	0.00433856	330.435	0.0118887	127.09	0.00390144	1016.72	0.0101883
7725.75	0.0343118	128.763	0.00404656	206.02	0.00718056	180.268	0.00443056	334.783	0.0116307	128.763	0.00365744	1030.1	0.00962533
7826.09	0.0362808	130.435	0.00398456	208.696	0.00689956	182.609	0.00426756	339.13	0.0106807	130.435	0.00417844	1043.48	0.00904933
7926.42	0.0338088	132.107	0.00400056	211.371	0.00620556	184.95	0.00394056	343.478	0.0114557	132.107	0.00394544	1056.86	0.00855233
8026.76	0.0348188	133.779	0.00399656	214.047	0.00659256	187.291	0.00429456	347.826	0.0113607	133.779	0.00433344	1070.23	0.00862633
8127.09	0.0326388	135.452	0.00427556	216.722	0.00668156	189.632	0.00436656	352.174	0.0113127	135.452	0.00386144	1083.61	0.00845533
8227.42	0.0336278	137.124	0.00379156	219.398	0.00619656	191.973	0.00444556	356.522	0.0107887	137.124	0.00377144	1096.99	0.00816833
8327.76	0.0324978	138.796	0.00383956	222.074	0.00680156	194.314	0.00368756	360.87	0.0110817	138.796	0.00416744	1110.37	0.00930033
8428.09	0.0312428	140.468	0.00430056	224.749	0.00672856	196.656	0.00406056	365.217	0.0106207	140.468	0.00400344	1123.75	0.00857433
8528.43	0.0324018	142.14	0.00395856	227.425	0.00615156	198.997	0.00448656	369.565	0.0103777	142.14	0.00378544	1137.12	0.00803033
8628.76	0.0317118	143.813	0.00367856	230.1	0.00604856	201.338	0.00403656	373.913	0.00959367	143.813	0.00366544	1150.5	0.00854133
8729.1	0.0325768	145.485	0.00407656	232.776	0.00628056	203.679	0.00393556	378.261	0.0108667	145.485	0.00391744	1163.88	0.00766533
8829.43	0.0316768	147.157	0.00438756	235.452	0.00595656	206.02	0.00394256	382.609	0.0117377	147.157	0.00397044	1177.26	0.00842333
8929.77	0.0318328	148.829	0.00415456	238.127	0.00630256	208.361	0.00401856	386.957	0.00982567	148.829	0.00353744	1190.64	0.00722233
9030.1	0.0319968	150.502	0.00414056	240.803	0.00588756	210.702	0.00381856	391.304	0.0110537	150.502	0.00391744	1204.01	0.00793333
9130.43	0.0293648	152.174	0.00396856	243.478	0.00607356	213.043	0.00420556	395.652	0.0102667	152.174	0.00371244	1217.39	0.00758833
9230.77	0.0309938	153.846	0.00418956	246.154	0.00641056	215.385	0.00367956	400	0.0104907	153.846	0.00356844	1230.77	0.00777033
9331.1	0.0281118	155.518	0.00379756	248.829	0.00574956	217.726	0.00404856	404.348	0.0105117	155.518	0.00374844	1244.15	0.00722933
9431.44	0.0311948	157.191	0.00359956	251.505	0.00587756	220.067	0.00434956	408.696	0.0100257	157.191	0.00362244	1257.53	0.00742133
9531.77	0.0298728	158.863	0.00392656	254.181	0.00541656	222.408	0.00381556	413.043	0.00997067	158.863	0.00370044	1270.9	0.00764333
9632.11	0.0309478	160.535	0.00349256	256.856	0.00563556	224.749	0.00374256	417.391	0.00964767	160.535	0.00355844	1284.28	0.00814133
9732.44	0.0311328	162.207	0.00392156	259.532	0.00601856	227.09	0.00426456	421.739	0.0100087	162.207	0.00381244	1297.66	0.00755333
9832.78	0.0283888	163.88	0.00390156	262.207	0.00617056	229.431	0.00370856	426.087	0.0102087	163.88	0.00332344	1311.04	0.00756833
9933.11	0.0289718	165.552	0.00357156	264.883	0.00556856	231.773	0.00390356	430.435	0.00848367	165.552	0.00342944	1324.42	0.00704333
10033.4	0.0288288	167.224	0.00382256	267.559	0.00524756	234.114	0.00420656	434.783	0.00961767	167.224	0.00370244	1337.79	0.00699233
10133.8	0.0295488	168.896	0.00390856	270.234	0.00534956	236.455	0.00371656	439.13	0.00942167	168.896	0.00351844	1351.17	0.00700233
10234.1	0.0285198	170.569	0.00392956	272.91	0.00556956	238.796	0.00353056	443.478	0.00943867	170.569	0.00354244	1364.55	0.00670233
10334.4	0.0269948	172.241	0.00392156	275.585	0.00524856	241.137	0.00381756	447.826	0.00957867	172.241	0.00408344	1377.93	0.00646433
10434.8	0.0294318	173.913	0.00384156	278.261	0.00561656	243.478	0.00384756	452.174	0.00938767	173.913	0.00309644	1391.3	0.00693333
10535.1	0.0298238	175.585	0.00340256	280.936	0.00526256	245.819	0.00445656	456.522	0.00866467	175.585	0.00374144	1404.68	0.00718133
10635.5	0.0271588	177.258	0.00357956	283.612	0.00542856	248.161	0.00365756	460.87	0.00946267	177.258	0.00348944	1418.06	0.00635433
10735.8	0.0274048	178.93	0.00403656	286.288	0.00579056	250.502	0.00387356	465.217	0.00845267	178.93	0.00317144	1431.44	0.00576333
10836.1	0.0276208	180.602	0.00371956	288.963	0.00511556	252.843	0.00387756	469.565	0.00925167	180.602	0.00351344	1444.82	0.00644333
10936.5	0.0266478	182.274	0.00370156	291.639	0.00497056	255.184	0.00342656	473.913	0.00803767	182.274	0.00353644	1458.19	0.00652333
11036.8	0.0260298	183.946	0.00346656	294.314	0.00543256	257.525	0.00354956	478.261	0.00869667	183.946	0.00348144	1471.57	0.00676233
11137.1	0.0269578	185.619	0.00380156	296.99	0.00507056	259.866	0.00346656	482.609	0.00898767	185.619	0.00318244	1484.95	0.00681433
11237.5	0.0287238	187.291	0.00370956	299.666	0.00492656	262.207	0.00367756	486.957	0.00915767	187.291	0.00329844	1498.33	0.00594333
11337.8	0.0280078	188.963	0.00366456	302.341	0.00506156	264.548	0.00338756	491.304	0.00903267	188.963	0.00354644	1511.71	0.00678133
11438.1	0.0287218	190.635	0.00346756	305.017	0.00509156	266.89	0.00382456	495.652	0.00906067	190.635	0.00351744	1525.08	0.00624633
11538.5	0.0280938	192.308	0.00366956	307.692	0.00564156	269.231	0.00346756	500	0.00826467	192.308	0.00368944	1538.46	0.00544433
11638.8	0.0261928	193.98	0.00336856	310.368	0.00491056	271.572	0.00350756	504.348	0.00834267	193.98	0.00320744	1551.84	0.00597233
11739.1	0.0261578	195.652	0.00381656	313.043	0.00517356	273.913	0.00392356	508.696	0.00869567	195.652	0.00316144	1565.22	0.00681933
11839.5	0.0260938	197.324	0.00365456	315.719	0.00478756	276.254	0.00356856	513.043	0.00846367	197.324	0.00359144	1578.59	0.00573933
11939.8	0.0259608	198.997	0.00337156	318.395	0.00542356	278.595	0.00368656	517.391	0.00817567	198.997	0.00333844	1591.97	0.00632933
12040.1	0.0253388	200.669	0.00368656	321.07	0.00469956	280.936	0.00398356	521.739	0.00885067	200.669	0.00316844	1605.35	0.00611933
12140.5	0.0254118	202.341	0.00358756	323.746	0.00536656	283.278	0.00345256	526.087	0.00785167	202.341	0.00325344	1618.73	0.00579633
12240.8	0.0267928	204.013	0.00357256	326.421	0.00520256	285.619	0.00333456	530.435	0.00838667	204.013	0.00343644	1632.11	0.00578433
12341.1	0.0245808	205.686	0.00339656	329.097	0.00511356	287.96	0.00365356	534.783	0.00849067	205.686	0.00326844	1645.48	0.00558833
12441.5	0.0260598	207.358	0.00360156	331.773	0.00496156	290.301	0.00357356	539.13	0.00812867	207.358	0.00347544	1658.86	0.00593033
12541.8	0.0257588	209.03	0.00364556	334.448	0.00482756	292.642	0.00328956	543.478	0.00850367	209.03	0.00290044	1672.24	0.00526633
12642.1	0.0246148	210.702	0.00315756	337.124	0.00495556	294.983	0.00334556	547.826	0.00828767	210.702	0.00333944	1685.62	0.00544533
12742.5	0.0238998	212.375	0.00356456	339.799	0.00525156	297.324	0.00300256	552.174	0.00752567	212.375	0.00334844	1699	0.00551533
12842.8	0.0232908	214.047	0.00328956	342.475	0.00487756	299.666	0.00323956	556.522	0.00794267	214.047	0.00315644	1712.38	0.00524233
12943.1	0.0231668	215.719	0.00341556	345.151	0.00536756	302.007	0.00343556	560.87	0.00792567	215.719	0.00351344	1725.75	0.00527033
13043.5	0.0233778	217.391	0.00335656	347.826	0.00517256	304.348	0.00338956	565.217	0.00753467	217.391	0.00351044	1739.13	0.00538533
13143.8	0.0241908	219.064	0.00307056	350.502	0.00396156	306.689	0.00365456	569.565	0.00765467	219.064	0.00312344	1752.51	0.00552633
13244.1	0.0243068	220.736	0.00330556	353.177	0.00543256	309.03	0.00353956	573.913	0.00707367	220.736	0.00326544	1765.89	0.00558533
13344.5	0.0231118	222.408	0.00325256	355.853	0.00482556	311.371	0.00341956	578.261	0.00801267	222.408	0.00337344	1779.26	0.00479233
13444.8	0.0252088	224.08	0.00345756	358.528	0.00430756	313.712	0.00337456	582.609	0.00761367	224.08	0.00314744	1792.64	0.00580333
13545.2	0.0242998	225.753	0.00313656	361.204	0.00484056	316.054	0.00344456	586.957	0.00739067	225.753	0.00322144	1806.02	0.00555333
13645.5	0.0227048	227.425	0.00334456	363.88	0.00470256	318.395	0.00365856	591.304	0.00793667	227.425	0.00301944	1819.4	0.00552333
13745.8	0.0232218	229.097	0.00305556	366.555	0.00462756	320.736	0.00328756	595.652	0.00721867	229.097	0.00349644	1832.78	0.00549033
13846.2	0.0245028	230.769	0.00369256	369.231	0.00457356	323.077	0.00339356	600	0.00800867	230.769	0.00320944	1846.15	0.00463533
13946.5	0.0224878	232.441	0.00321856	371.906	0.00449556	325.418	0.00343956	604.348	0.00728067	232.441	0.00341344	1859.53	0.00511133
14046.8	0.0225108	234.114	0.00337056	374.582	0.00459956	327.759	0.00336656	608.696	0.00676567	234.114	0.00330844	1872.91	0.00442333
14147.2	0.0227098	235.786	0.00329656	377.258	0.00461056	330.1	0.00304556	613.043	0.00687767	235.786	0.00295744	1886.29	0.00478533
14247.5	0.0227518	237.458	0.00332456	379.933	0.00456156	332.441	0.00362856	617.391	0.00714267	237.458	0.00356644	1899.67	0.00525333
14347.8	0.0216448	239.13	0.00316556	382.609	0.00430756	334.783	0.00330656	621.739	0.00758867	239.13	0.00329044	1913.04	0.00463833
14448.2	0.0212848	240.803	0.00307556	385.284	0.00489856	337.124	0.00350956	626.087	0.00776567	240.803	0.00297944	1926.42	0.00446533
14548.5	0.0214768	242.475	0.00323656	387.96	0.00467256	339.465	0.00346856	630.435	0.00707567	242.475	0.00317144	1939.8	0.00445533
14648.8	0.0233888	244.147	0.00304656	390.635	0.00449756	341.806	0.00307356	634.783	0.00691067	244.147	0.00280744	1953.18	0.00488933
14749.2	0.0209828	245.819	0.00318156	393.311	0.00478856	344.147	0.00329456	639.13	0.00760067	245.819	0.00322744	1966.56	0.00450633
14849.5	0.0220148	247.492	0.00296956	395.987	0.00483156	346.488	0.00332256	643.478	0.00699267	247.492	0.00305744	1979.93	0.00439033
14949.8	0.0221228	249.164	0.00310456	398.662	0.00489656	348.829	0.00301656	647.826	0.00710667	249.164	0.00292644	1993.31	0.00407433
15050.2	0.0218438	250.836	0.00287156	401.338	0.00410256	351.171	0.00303956	652.174	0.00626767	250.836	0.00308044	2006.69	0.00450033
15150.5	0.0216738	252.508	0.00295956	404.013	0.00471656	353.512	0.00294256	656.522	0.00692567	252.508	0.00274944	2020.07	0.00413633
15250.8	0.0224878	254.181	0.00295556	406.689	0.00408956	355.853	0.00326356	660.87	0.00702067	254.181	0.00315144	2033.44	0.00469233
15351.2	0.0203548	255.853	0.00281856	409.365	0.00436156	358.194	0.00313956	665.217	0.00629567	255.853	0.00311144	2046.82	0.00418633
15451.5	0.0204308	257.525	0.00285656	412.04	0.00401156	360.535	0.00291056	669.565	0.00671467	257.525	0.00271044	2060.2	0.00467833
15551.8	0.0211068	259.197	0.00300656	414.716	0.00378956	362.876	0.00314356	673.913	0.00700667	259.197	0.00291144	2073.58	0.00460533
15652.2	0.0205538	260.87	0.00311556	417.391	0.00486056	365.217	0.00306056	678.261	0.00670867	260.87	0.00302544	2086.96	0.00449833
15752.5	0.0195798	262.542	0.00286656	420.067	0.00422256	367.559	0.00300656	682.609	0.00672167	262.542	0.00299544	2100.33	0.00471333
15852.8	0.0205298	264.214	0.00311456	422.742	0.00424656	369.9	0.00334256	686.957	0.00695467	264.214	0.00275744	2113.71	0.00449533
15953.2	0.0211188	265.886	0.00344556	425.418	0.00438556	372.241	0.00304656	691.304	0.00690167	265.886	0.00294644	2127.09	0.00386633
16053.5	0.0202648	267.559	0.00299656	428.094	0.00433556	374.582	0.00289756	695.652	0.00631767	267.559	0.00304944	2140.47	0.00416233
16153.8	0.0206898	269.231	0.00271456	430.769	0.00441156	376.923	0.00326256	700	0.00656467	269.231	0.00284844	2153.85	0.00441533
16254.2	0.0202778	270.903	0.00300056	433.445	0.00420156	379.264	0.00287556	704.348	0.00635067	270.903	0.00293044	2167.22	0.00397833
16354.5	0.0196138	272.575	0.00325756	436.12	0.00413656	381.605	0.00340056	708.696	0.00605067	272.575	0.00284544	2180.6	0.00465533
16454.8	0.0204238	274.247	0.00307056	438.796	0.00381856	383.946	0.00301756	713.043	0.00637867	274.247	0.00297044	2193.98	0.00403133
16555.2	0.0191588	275.92	0.00283956	441.472	0.00423856	386.288	0.00313556	717.391	0.00678167	275.92	0.00292744	2207.36	0.00394233
16655.5	0.0211278	277.592	0.00275856	444.147	0.00400956	388.629	0.00324956	721.739	0.00648667	277.592	0.00284644	2220.74	0.00379533
16755.9	0.0186698	279.264	0.00293656	446.823	0.00457356	390.97	0.00280556	726.087	0.00583067	279.264	0.00274544	2234.11	0.00391433
16856.2	0.0204778	280.936	0.00280456	449.498	0.00440756	393.311	0.00314956	730.435	0.00633867	280.936	0.00310144	2247.49	0.00441833
16956.5	0.0192048	282.609	0.00276556	452.174	0.00407556	395.652	0.00314756	734.783	0.00628167	282.609	0.00306044	2260.87	0.00433333
17056.9	0.0192798	284.281	0.00278156	454.849	0.00409256	397.993	0.00309656	739.13	0.00630167	284.281	0.00279844	2274.25	0.00422933
17157.2	0.0193718	285.953	0.00313756	457.525	0.00404756	400.334	0.00284656	743.478	0.00663667	285.953	0.00280744	2287.62	0.00371033
17257.5	0.0186738	287.625	0.00273556	460.201	0.00442256	402.676	0.00282456	747.826	0.00626667	287.625	0.00265044	2301	0.00397333
17357.9	0.0181888	289.298	0.00294656	462.876	0.00424356	405.017	0.00273856	752.174	0.00614667	289.298	0.00309044	2314.38	0.00377833
17458.2	0.0189788	290.97	0.00287056	465.552	0.00373156	407.358	0.00279356	756.522	0.00617867	290.97	0.00280244	2327.76	0.00368333
17558.5	0.0178068	292.642	0.00266656	468.227	0.00387656	409.699	0.00285756	760.87	0.00621867	292.642	0.00285744	2341.14	0.00395133
17658.9	0.0194518	294.314	0.00292256	470.903	0.00375256	412.04	0.00301756	765.217	0.00562867	294.314	0.00298344	2354.51	0.00344133
17759.2	0.0185998	295.987	0.00264956	473.579	0.00374056	414.381	0.00322856	769.565	0.00654367	295.987	0.00293644	2367.89	0.00370633
17859.5	0.0190428	297.659	0.00261556	476.254	0.00399656	416.722	0.00273756	773.913	0.00569467	297.659	0.00280244	2381.27	0.00375933
17959.9	0.0170698	299.331	0.00266056	478.93	0.00395856	419.064	0.00296256	778.261	0.00593767	299.331	0.00299144	2394.65	0.00398233
18060.2	0.0172638	301.003	0.00267956	481.605	0.00409156	421.405	0.00327556	782.609	0.00567567	301.003	0.00267744	2408.03	0.00338033
18160.5	0.0180308	302.676	0.00290556	484.281	0.00398756	423.746	0.00307056	786.957	0.00573567	302.676	0.00258344	2421.41	0.00405833
18260.9	0.0186798	304.348	0.00263856	486.957	0.00433156	426.087	0.00308956	791.304	0.00498067	304.348	0.00292344	2434.78	0.00387333
18361.2	0.0170808	306.02	0.00274956	489.632	0.00415756	428.428	0.00294556	795.652	0.00567867	306.02	0.00271244	2448.16	0.00341333
18461.5	0.0171368	307.692	0.00286056	492.308	0.00397956	430.769	0.00283456	800	0.00530867	307.692	0.00295044	2461.54	0.00323633
18561.9	0.0172098	309.365	0.00287856	494.983	0.00379156	433.11	0.00283056	804.348	0.00498267	309.365	0.00293844	2474.92	0.00329133
18662.2	0.0174398	311.037	0.00264756	497.659	0.00413956	435.452	0.00272356	808.696	0.00567367	311.037	0.00278344	2488.29	0.00347233
18762.5	0.0186048	312.709	0.00258956	500.334	0.00419156	437.793	0.00300256	813.043	0.00564467	312.709	0.00276844	2501.67	0.00370533
18862.9	0.0177598	314.381	0.00268956	503.01	0.00376656	440.134	0.00268956	817.391	0.00559767	314.381	0.00270344	2515.05	0.00382233
18963.2	0.0168628	316.054	0.00255856	505.686	0.00375356	442.475	0.00285356	821.739	0.00604667	316.054	0.00285244	2528.43	0.00359933
19063.5	0.0177938	317.726	0.00270456	508.361	0.00388056	444.816	0.00270756	826.087	0.00597467	317.726	0.00248944	2541.81	0.00356233
19163.9	0.0180018	319.398	0.00272656	511.037	0.00385756	447.157	0.00293756	830.435	0.00594467	319.398	0.00272044	2555.18	0.00321233
19264.2	0.0182438	321.07	0.00264956	513.712	0.00402356	449.498	0.00330356	834.783	0.00578767	321.07	0.00261744	2568.56	0.00341433
19364.5	0.0162708	322.742	0.00249556	516.388	0.00364156	451.839	0.00278656	839.13	0.00566267	322.742	0.00270544	2581.94	0.00310533
19464.9	0.0175728	324.415	0.00275856	519.064	0.00391756	454.181	0.00284656	843.478	0.00552467	324.415	0.00275244	2595.32	0.00357333
19565.2	0.0171038	326.087	0.00275656	521.739	0.00394056	456.522	0.00277756	847.826	0.00538667	326.087	0.00275344	2608.7	0.00330633
19665.6	0.0175028	327.759	0.00279656	524.415	0.00390756	458.863	0.00260956	852.174	0.00577067	327.759	0.00278144	2622.07	0.00323033
19765.9	0.0187178	329.431	0.00260056	527.09	0.00340256	461.204	0.00297856	856.522	0.00595267	329.431	0.00286044	2635.45	0.00345533
19866.2	0.0165498	331.104	0.00276656	529.766	0.00420056	463.545	0.00272256	860.87	0.00572267	331.104	0.00263844	2648.83	0.00350933
19966.6	0.0170278	332.776	0.00276456	532.441	0.00374356	465.886	0.00273756	865.217	0.00511367	332.776	0.00262244	2662.21	0.00354333
20066.9	0.0159578	334.448	0.00269256	535.117	0.00380756	468.227	0.00299356	869.565	0.00589467	334.448	0.00255344	2675.58	0.00325633
		336.12	0.00227856	537.793	0.00401556	470.569	0.00282756	873.913	0.00555067	336.12	0.00271844	2688.96	0.00352533
		337.793	0.00260656	540.468	0.00378256	472.91	0.00287556	878.261	0.00568667	337.793	0.00250844	2702.34	0.00314633
		339.465	0.00245256	543.144	0.00387156	475.251	0.00283256	882.609	0.00504167	339.465	0.00262644	2715.72	0.00342433
		341.137	0.00264256	545.819	0.00348156	477.592	0.00299856	886.957	0.00568767	341.137	0.00261144	2729.1	0.00338433
		342.809	0.00274556	548.495	0.00417756	479.933	0.00279556	891.304	0.00544667	342.809	0.00280244	2742.48	0.00293433
		344.482	0.00254656	551.171	0.00406856	482.274	0.00253656	895.652	0.00548067	344.482	0.00243744	2755.85	0.00274533
		346.154	0.00273056	553.846	0.00420056	484.615	0.00285556	900	0.00549167	346.154	0.00235344	2769.23	0.00327533
		347.826	0.00242856	556.522	0.00404856	486.957	0.00287756	904.348	0.00567567	347.826	0.00297144	2782.61	0.00294533
		349.498	0.00268256	559.197	0.00345856	489.298	0.00268756	908.696	0.00552867	349.498	0.00244144	2795.99	0.00324533
		351.171	0.00271156	561.873	0.00337056	491.639	0.00280356	913.043	0.00511467	351.171	0.00266744	2809.36	0.00291633
		352.843	0.00232056	564.548	0.00403956	493.98	0.00251056	917.391	0.00495367	352.843	0.00235044	2822.74	0.00355533
		354.515	0.00212156	567.224	0.00355356	496.321	0.00268256	921.739	0.00505667	354.515	0.00250144	2836.12	0.00341033
		356.187	0.00266056	569.9	0.00358956	498.662	0.00254756	926.087	0.00506467	356.187	0.00193944	2849.5	0.00307033
		357.86	0.00244256	572.575	0.00428956	501.003	0.00250356	930.435	0.00546867	357.86	0.00257244	2862.88	0.00336433
		359.532	0.00259256	575.251	0.00388356	503.344	0.00242056	934.783	0.00484067	359.532	0.00244844	2876.25	0.00300333
		361.204	0.00249156	577.926	0.00331656	505.686	0.00270856	939.13	0.00537067	361.204	0.00291344	2889.63	0.00318833
		362.876	0.00260956	580.602	0.00357856	508.027	0.00215556	943.478	0.00505867	362.876	0.00259544	2903.01	0.00267033
		364.548	0.00229756	583.278	0.00349356	510.368	0.00267456	947.826	0.00485467	364.548	0.00213144	2916.39	0.00323633
		366.221	0.00245856	585.953	0.00381756	512.709	0.00287356	952.174	0.00529667	366.221	0.00268144	2929.77	0.00284633
		367.893	0.00246956	588.629	0.00395756	515.05	0.00294956	956.522	0.00489667	367.893	0.00247544	2943.14	0.00304333
		369.565	0.00248756	591.304	0.00359256	517.391	0.00256656	960.87	0.00440767	369.565	0.00251944	2956.52	0.00324633
		371.237	0.00225756	593.98	0.00365356	519.732	0.00254256	965.217	0.00463667	371.237	0.00252244	2969.9	0.00293433
		372.91	0.00245556	596.656	0.00374056	522.074	0.00252256	969.565	0.00495067	372.91	0.00252944	2983.28	0.00284333
		374.582	0.00246156	599.331	0.00383356	524.415	0.00236356	973.913	0.00532367	374.582	0.00204744	2996.66	0.00310533
		376.254	0.00250856	602.007	0.00376656	526.756	0.00281056	978.261	0.00487067	376.254	0.00249744	3010.03	0.00293633
		377.926	0.00241556	604.682	0.00352156	529.097	0.00255356	982.609	0.00481367	377.926	0.00262644	3023.41	0.00331133
		379.599	0.00225056	607.358	0.00349556	531.438	0.00257956	986.957	0.00464067	379.599	0.00258144	3036.79	0.00291933
		381.271	0.00245856	610.033	0.00402356	533.779	0.00248356	991.304	0.00477667	381.271	0.00253344	3050.17	0.00288133
		382.943	0.00229756	612.709	0.00353656	536.12	0.00251956	995.652	0.00457567	382.943	0.00269844	3063.54	0.00252233
		384.615	0.00238056	615.385	0.00344556	538.462	0.00263256	1000	0.00458467	384.615	0.00270344	3076.92	0.00292633
		386.288	0.00225756	618.06	0.00364956	540.803	0.00284056	1004.35	0.00454767	386.288	0.00226244	3090.3	0.00274533
		387.96	0.00207156	620.736	0.00351356	543.144	0.00282256	1008.7	0.00483267	387.96	0.00248944	3103.68	0.00271833
		389.632	0.00237456	623.411	0.00349056	545.485	0.00258656	1013.04	0.00475167	389.632	0.00230244	3117.06	0.00270833
		391.304	0.00233756	626.087	0.00346156	547.826	0.00251256	1017.39	0.00468067	391.304	0.00220744	3130.44	0.00261933
		392.977	0.00207256	628.763	0.00329656	550.167	0.00258356	1021.74	0.00499567	392.977	0.00230644	3143.81	0.00270833
		394.649	0.00199056	631.438	0.00344956	552.508	0.00232256	1026.09	0.00505167	394.649	0.00222144	3157.19	0.00295533
		396.321	0.00246156	634.114	0.00381256	554.849	0.00262356	1030.44	0.00440467	396.321	0.00225844	3170.57	0.00281333
		397.993	0.00228456	636.789	0.00374656	557.191	0.00235556	1034.78	0.00465867	397.993	0.00239344	3183.95	0.00249333
		399.666	0.00241556	639.465	0.00371556	559.532	0.00275456	1039.13	0.00437867	399.666	0.00245944	3197.32	0.00264133
		401.338	0.00233956	642.14	0.00390956	561.873	0.00235856	1043.48	0.00494667	401.338	0.00227344	3210.7	0.00271133
		403.01	0.00216956	644.816	0.00333856	564.214	0.00221856	1047.83	0.00498267	403.01	0.00239944	3224.08	0.00268133
		404.682	0.00228456	647.492	0.00380656	566.555	0.00230756	1052.17	0.00436267	404.682	0.00230944	3237.46	0.00283133
		406.355	0.00240556	650.167	0.00363656	568.896	0.00238956	1056.52	0.00438567	406.355	0.00252544	3250.84	0.00279333
		408.027	0.00215956	652.843	0.00327356	571.237	0.00265556	1060.87	0.00448867	408.027	0.00225144	3264.21	0.00240333
		409.699	0.00204856	655.518	0.00325556	573.579	0.00235056	1065.22	0.00426567	409.699	0.00247544	3277.59	0.00263833
		411.371	0.00220556	658.194	0.00335756	575.92	0.00214356	1069.56	0.00494267	411.371	0.00226744	3290.97	0.00285233
		413.043	0.00229156	660.87	0.00313156	578.261	0.00217556	1073.91	0.00426067	413.043	0.00237744	3304.35	0.00262433
		414.716	0.00223956	663.545	0.00341056	580.602	0.00247956	1078.26	0.00448767	414.716	0.00228144	3317.73	0.00269133
		416.388	0.00261156	666.221	0.00348356	582.943	0.00246556	1082.61	0.00487267	416.388	0.00244344	3331.1	0.00263433
		418.06	0.00212656	668.896	0.00330556	585.284	0.00231356	1086.96	0.00424767	418.06	0.00225844	3344.48	0.00245633
		419.732	0.00230056	671.572	0.00348356	587.625	0.00252556	1091.3	0.00428067	419.732	0.00256344	3357.86	0.00263233
		421.405	0.00197256	674.247	0.00326356	589.967	0.00230256	1095.65	0.00447467	421.405	0.00226044	3371.24	0.00268133
		423.077	0.00194256	676.923	0.00353856	592.308	0.00232456	1100	0.00470567	423.077	0.00221944	3384.61	0.00236133
		424.749	0.00219956	679.599	0.00358256	594.649	0.00251556	1104.35	0.00450867	424.749	0.00235644	3397.99	0.00259333
		426.421	0.00220556	682.274	0.00320356	596.99	0.00259556	1108.7	0.00493367	426.421	0.00237644	3411.37	0.00261233
		428.094	0.00234856	684.95	0.00316556	599.331	0.00283056	1113.04	0.00510267	428.094	0.00232344	3424.75	0.00241033
		429.766	0.00220656	687.625	0.00332356	601.672	0.00254556	1117.39	0.00446067	429.766	0.00246644	3438.13	0.00251133
		431.438	0.00241556	690.301	0.00338156	604.013	0.00238356	1121.74	0.00465767	431.438	0.00260344	3451.5	0.00244133
		433.11	0.00230856	692.977	0.00282056	606.355	0.00229056	1126.09	0.00422467	433.11	0.00206944	3464.88	0.00265333
		434.783	0.00199456	695.652	0.00344956	608.696	0.00221656	1130.44	0.00399667	434.783	0.00228644	3478.26	0.00271433
		436.455	0.00196656	698.328	0.00319156	611.037	0.00230556	1134.78	0.00430567	436.455	0.00234544	3491.64	0.00239433
		438.127	0.00207756	701.003	0.00312256	613.378	0.00213056	1139.13	0.00462867	438.127	0.00225044	3505.02	0.00257433
		439.799	0.00216156	703.679	0.00330556	615.719	0.00227756	1143.48	0.00444467	439.799	0.00212844	3518.4	0.00211433
		441.472	0.00220456	706.355	0.00354856	618.06	0.00254656	1147.83	0.00407267	441.472	0.00231244	3531.77	0.00259433
		443.144	0.00218656	709.03	0.00332956	620.401	0.00220356	1152.17	0.00437767	443.144	0.00236144	3545.15	0.00228433
		444.816	0.00205156	711.706	0.00343856	622.742	0.00231956	1156.52	0.00425367	444.816	0.00211844	3558.53	0.00235633
		446.488	0.00222556	714.381	0.00336956	625.084	0.00257556	1160.87	0.00410267	446.488	0.00232144	3571.91	0.00220233
		448.161	0.00204456	717.057	0.00349156	627.425	0.00217056	1165.22	0.00457167	448.161	0.00219144	3585.28	0.00243033
		449.833	0.00200056	719.732	0.00335856	629.766	0.00216956	1169.56	0.00396267	449.833	0.00206144	3598.66	0.00215933
		451.505	0.00224956	722.408	0.00333156	632.107	0.00231656	1173.91	0.00385267	451.505	0.00201544	3612.04	0.00219833
		453.177	0.00213156	725.084	0.00363556	634.448	0.00241256	1178.26	0.00385167	453.177	0.00182244	3625.42	0.00243033
		454.849	0.00175856	727.759	0.00304656	636.789	0.00231356	1182.61	0.00403267	454.849	0.00234744	3638.8	0.00233333
		456.522	0.00210656	730.435	0.00294256	639.13	0.00238556	1186.96	0.00386667	456.522	0.00215644	3652.17	0.00225633
		458.194	0.00198856	733.11	0.00330356	641.472	0.00214956	1191.3	0.00441867	458.194	0.00200144	3665.55	0.00208533
		459.866	0.00226856	735.786	0.00318056	643.813	0.00220656	1195.65	0.00419567	459.866	0.00219544	3678.93	0.00213233
		461.538	0.00226256	738.462	0.00308556	646.154	0.00218556	1200	0.00421267	461.538	0.00225944	3692.31	0.00221833
		463.211	0.00223156	741.137	0.00340856	648.495	0.00238656	1204.35	0.00411667	463.211	0.00226144	3705.69	0.00246933
		464.883	0.00211856	743.813	0.00343556	650.836	0.00206656	1208.7	0.00370067	464.883	0.00208644	3719.06	0.00236033
		466.555	0.00219156	746.488	0.00304556	653.177	0.00211356	1213.04	0.00444867	466.555	0.00226244	3732.44	0.00209233
		468.227	0.00187656	749.164	0.00277156	655.518	0.00225756	1217.39	0.00377667	468.227	0.00201744	3745.82	0.00260133
		469.9	0.00203856	751.839	0.00332756	657.86	0.00227556	1221.74	0.00407367	469.9	0.00209044	3759.2	0.00234933
		471.572	0.00204456	754.515	0.00321056	660.201	0.00228556	1226.09	0.00435667	471.572	0.00195344	3772.57	0.00241233
		473.244	0.00209056	757.191	0.00344656	662.542	0.00232056	1230.44	0.00411867	473.244	0.00200744	3785.95	0.00227033
		474.916	0.00202556	759.866	0.00317756	664.883	0.00228856	1234.78	0.00427067	474.916	0.00245644	3799.33	0.00203133
		476.589	0.00211856	762.542	0.00313756	667.224	0.00206256	1239.13	0.00405267	476.589	0.00215144	3812.71	0.00201133
		478.261	0.00197756	765.217	0.00346156	669.565	0.00219756	1243.48	0.00402067	478.261	0.00221044	3826.09	0.00231133
		479.933	0.00185456	767.893	0.00323356	671.906	0.00227456	1247.83	0.00435667	479.933	0.00191944	3839.47	0.00195933
		481.605	0.00199056	770.569	0.00324056	674.247	0.00225856	1252.17	0.00458067	481.605	0.00200544	3852.84	0.00234533
		483.278	0.00208856	773.244	0.00324656	676.589	0.00222956	1256.52	0.00369867	483.278	0.00216544	3866.22	0.00213133
		484.95	0.00201956	775.92	0.00325256	678.93	0.00232956	1260.87	0.00417667	484.95	0.00217344	3879.6	0.00216433
		486.622	0.00210556	778.595	0.00305556	681.271	0.00241656	1265.22	0.00433667	486.622	0.00213744	3892.98	0.00255933
		488.294	0.00190456	781.271	0.00315556	683.612	0.00204656	1269.56	0.00423567	488.294	0.00195344	3906.35	0.00217833
		489.967	0.00181856	783.946	0.00323356	685.953	0.00195456	1273.91	0.00404367	489.967	0.00198844	3919.73	0.00214633
		491.639	0.00196556	786.622	0.00298656	688.294	0.00222056	1278.26	0.00390867	491.639	0.00226044	3933.11	0.00216433
		493.311	0.00191656	789.298	0.00313156	690.635	0.00234256	1282.61	0.00415767	493.311	0.00217744	3946.49	0.00215533
		494.983	0.00190256	791.973	0.00297756	692.977	0.00225656	1286.96	0.00382667	494.983	0.00200544	3959.87	0.00211533
		496.656	0.00198556	794.649	0.00298056	695.318	0.00208856	1291.3	0.00394767	496.656	0.00202544	3973.24	0.00251133
		498.328	0.00208056	797.324	0.00322356	697.659	0.00230756	1295.65	0.00409367	498.328	0.00224544	3986.62	0.00219233
		500	0.00197756	800	0.00327056	700	0.00188256	1300	0.00381167	500	0.00188944	4000	0.00209533

## Sheet: Dataset 8
HgBr 20092021 8	HgBr 20092021 8	HgBr 20092021 9	HgBr 20092021 9	HgBr 20092021 10	HgBr 20092021 10	HgBr 20092021 11	HgBr 20092021 11	HgBr 20092021 12	HgBr 20092021 12	HgBr 20092021 13	HgBr 20092021 13	HgBr 20092021 14	HgBr 20092021 14	HgBr 20092021 15	HgBr 20092021 15
[O3]0/molecule cm-3	449525000000000	[O3]0/molecule cm-3	113053000000000	[O3]0/molecule cm-3	218842000000000	[O3]0/molecule cm-3	242562000000000	[O3]0/molecule cm-3	41341300000000	[O3]0/molecule cm-3	357565000000000	[O3]0/molecule cm-3	17282400000000	[O3]0/molecule cm-3	0
pf	0.51	pf	0.51	pf	0.51	pf	0.51	pf	0.51	pf	0.51	pf	0.51	pf	0
t/us	HgBr LIF Signal	t/us	HgBr LIF Signal	t/us	HgBr LIF Signal	t/us	HgBr LIF Signal	t/us	HgBr LIF Signal	t/us	HgBr LIF Signal	t/us	HgBr LIF Signal	t/us	HgBr LIF Signal
-60	0.000230222	-130	0.000550889	-70	0.000281778	-70	0.000311	-250	0.000846111	-60	0.000244444	-500	0.000616444	-3000	0.00197556
-54	-3.67778e-05	-117	-9.11111e-06	-63	2.57778e-05	-63	1.6e-05	-225	-1.48889e-05	-54	6.44444e-06	-450	3.74444e-05	-2700	-7.14444e-05
-48	1.72222e-05	-104	-7.11111e-06	-56	-1.72222e-05	-56	1e-05	-200	-1.28889e-05	-48	-2.15556e-05	-400	-4.65556e-05	-2400	4.55556e-06
-42	1.42222e-05	-91	2.48889e-05	-49	1.07778e-05	-49	-1.1e-05	-175	2.11111e-06	-42	-1.55556e-05	-350	-9.55556e-06	-2100	2.85556e-05
-36	-3.57778e-05	-78	-3.51111e-05	-42	-1.12222e-05	-42	5e-06	-150	-1.18889e-05	-36	-4.05556e-05	-300	2.14444e-05	-1800	-4.04444e-05
-30	1.72222e-05	-65	-4.11111e-06	-35	-4.62222e-05	-35	1e-06	-125	2.31111e-05	-30	4.64444e-05	-250	-3.95556e-05	-1500	-5.94444e-05
-24	-3.77778e-06	-52	-5.11111e-06	-28	-1.22222e-06	-28	-2.1e-05	-100	-7.88889e-06	-24	9.44444e-06	-200	5.34444e-05	-1200	-4.84444e-05
-18	-4.77778e-06	-39	1.68889e-05	-21	1.87778e-05	-21	-1.3e-05	-75	-1.68889e-05	-18	-1.65556e-05	-150	-6.85556e-05	-900	5.25556e-05
-12	1.02222e-05	-26	1.28889e-05	-14	-1.12222e-05	-14	7e-06	-50	3.71111e-05	-12	8.44444e-06	-100	6.44444e-06	-600	4.45556e-05
-6	2.22222e-05	-13	5.88889e-06	-7	3.17778e-05	-7	6e-06	-25	2.11111e-06	-6	2.34444e-05	-50	4.54444e-05	-300	8.95556e-05
0	4.32222e-05	0	3.88889e-06	0	2.47778e-05	0	-7e-06	0	3.31111e-05	0	5.44444e-06	0	-2.05556e-05	0	4.25556e-05
2.007	0.0220532	4.348	0.0271559	2.341	0.0221348	2.341	0.020831	8.361	0.0330031	2.007	0.0174814	16.722	0.0353234	100.334	0.0539546
4.013	0.0349552	8.696	0.0398769	4.682	0.0327618	4.682	0.031322	16.722	0.0502001	4.013	0.0278114	33.445	0.0546734	200.669	0.0835196
6.02	0.0323962	13.043	0.0375409	7.023	0.0332258	7.023	0.032627	25.084	0.0479571	6.02	0.0272214	50.167	0.0508414	301.003	0.0770586
8.027	0.0320772	17.391	0.0389369	9.365	0.0315738	9.365	0.030515	33.445	0.0441671	8.027	0.0276564	66.89	0.0496174	401.338	0.0803986
10.033	0.0301552	21.739	0.0374129	11.706	0.0299058	11.706	0.03	41.806	0.0451601	10.033	0.0266044	83.612	0.0513404	501.672	0.0794926
12.04	0.0283212	26.087	0.0358679	14.047	0.0288648	14.047	0.028614	50.167	0.0417991	12.04	0.0254264	100.334	0.0479944	602.007	0.0818726
14.047	0.0279482	30.435	0.0346589	16.388	0.0300398	16.388	0.028513	58.528	0.0416191	14.047	0.0233474	117.057	0.0443434	702.341	0.0841246
16.054	0.0261442	34.783	0.0333329	18.729	0.0266608	18.729	0.02652	66.89	0.0425481	16.054	0.0227854	133.779	0.0444774	802.676	0.0798996
18.06	0.0246152	39.13	0.0328939	21.07	0.0260068	21.07	0.026619	75.251	0.0385791	18.06	0.0217034	150.502	0.0446594	903.01	0.0723706
20.067	0.0232572	43.478	0.0329689	23.411	0.0269188	23.411	0.025792	83.612	0.0377351	20.067	0.0211314	167.224	0.0428714	1003.34	0.0732126
22.074	0.0224812	47.826	0.0319489	25.753	0.0231158	25.753	0.024933	91.973	0.0388431	22.074	0.0197394	183.946	0.0402194	1103.68	0.0736486
24.08	0.0221902	52.174	0.0307849	28.094	0.0237308	28.094	0.02413	100.334	0.0381421	24.08	0.0205304	200.669	0.0420124	1204.01	0.0748126
26.087	0.0209562	56.522	0.0282889	30.435	0.0220788	30.435	0.023495	108.696	0.0376791	26.087	0.0188774	217.391	0.0410454	1304.35	0.0709926
28.094	0.0206382	60.87	0.0276739	32.776	0.0231148	32.776	0.02229	117.057	0.0334391	28.094	0.0181994	234.114	0.0400354	1404.68	0.0702306
30.1	0.0197722	65.217	0.0267739	35.117	0.0225318	35.117	0.021316	125.418	0.0353181	30.1	0.0184594	250.836	0.0386054	1505.02	0.0714046
32.107	0.0168162	69.565	0.0263009	37.458	0.0218488	37.458	0.020451	133.779	0.0352071	32.107	0.0166464	267.559	0.0374574	1605.35	0.0673876
34.114	0.0176432	73.913	0.0267349	39.799	0.0200548	39.799	0.021181	142.14	0.0323661	34.114	0.0169544	284.281	0.0357864	1705.69	0.0655926
36.12	0.0176182	78.261	0.0248379	42.14	0.0204408	42.14	0.021245	150.502	0.0318781	36.12	0.0160334	301.003	0.0361704	1806.02	0.0670106
38.127	0.0174622	82.609	0.0245679	44.482	0.0196658	44.482	0.02019	158.863	0.0322451	38.127	0.0158704	317.726	0.0345474	1906.35	0.0632806
40.134	0.0170972	86.957	0.0244619	46.823	0.0187098	46.823	0.019633	167.224	0.0314001	40.134	0.0163764	334.448	0.0346324	2006.69	0.0652096
42.14	0.0155772	91.304	0.0243239	49.164	0.0192128	49.164	0.019756	175.585	0.0303071	42.14	0.0146664	351.171	0.0344604	2107.02	0.0632126
44.147	0.0152652	95.652	0.0239789	51.505	0.0188508	51.505	0.018022	183.946	0.0303301	44.147	0.0142594	367.893	0.0330144	2207.36	0.0625416
46.154	0.0148042	100	0.0232679	53.846	0.0185598	53.846	0.017061	192.308	0.0290631	46.154	0.0143834	384.615	0.0338544	2307.69	0.0641586
48.161	0.0144332	104.348	0.0232739	56.187	0.0186088	56.187	0.017287	200.669	0.0288351	48.161	0.0138434	401.338	0.0320464	2408.03	0.0571176
50.167	0.0147662	108.696	0.0234379	58.528	0.0177568	58.528	0.016776	209.03	0.0281061	50.167	0.0138454	418.06	0.0310774	2508.36	0.0598546
52.174	0.0137282	113.043	0.0222769	60.87	0.0169798	60.87	0.017311	217.391	0.0283501	52.174	0.0130504	434.783	0.0300804	2608.7	0.0597116
54.181	0.0142512	117.391	0.0220989	63.211	0.0169338	63.211	0.017659	225.753	0.0266351	54.181	0.0130674	451.505	0.0318004	2709.03	0.0578676
56.187	0.0134402	121.739	0.0221489	65.552	0.0168088	65.552	0.015705	234.114	0.0275281	56.187	0.0127064	468.227	0.0305634	2809.36	0.0586586
58.194	0.0131822	126.087	0.0200319	67.893	0.0167408	67.893	0.015519	242.475	0.0270611	58.194	0.0126714	484.95	0.0298454	2909.7	0.0584726
60.201	0.0128262	130.435	0.0189029	70.234	0.0167448	70.234	0.016097	250.836	0.0261761	60.201	0.0121294	501.672	0.0271904	3010.03	0.0553626
62.207	0.0131062	134.783	0.0188259	72.575	0.0151538	72.575	0.015011	259.197	0.0259811	62.207	0.0110494	518.395	0.0304034	3110.37	0.0548116
64.214	0.0128082	139.13	0.0198829	74.916	0.0159598	74.916	0.015464	267.559	0.0273301	64.214	0.0111284	535.117	0.0282734	3210.7	0.0543836
66.221	0.0118672	143.478	0.0195249	77.258	0.0153108	77.258	0.01514	275.92	0.0251071	66.221	0.0119504	551.839	0.0282334	3311.04	0.0549556
68.227	0.0114042	147.826	0.0197969	79.599	0.0159998	79.599	0.014834	284.281	0.0250471	68.227	0.0112684	568.562	0.0255304	3411.37	0.0562626
70.234	0.0123212	152.174	0.0186429	81.94	0.0145898	81.94	0.014774	292.642	0.0247111	70.234	0.0106084	585.284	0.0277844	3511.71	0.0544356
72.241	0.0110742	156.522	0.0181359	84.281	0.0142418	84.281	0.013865	301.003	0.0225771	72.241	0.0114304	602.007	0.0257154	3612.04	0.0537286
74.247	0.0114942	160.87	0.0175009	86.622	0.0140808	86.622	0.013741	309.365	0.0235001	74.247	0.0109634	618.729	0.0261764	3712.38	0.0530836
76.254	0.0108812	165.217	0.0171529	88.963	0.0140208	88.963	0.013847	317.726	0.0227961	76.254	0.0103584	635.452	0.0256944	3812.71	0.0546136
78.261	0.0105862	169.565	0.0189809	91.304	0.0138358	91.304	0.013021	326.087	0.0216951	78.261	0.0106494	652.174	0.0253044	3913.04	0.0511176
80.268	0.0109052	173.913	0.0179639	93.645	0.0131608	93.645	0.012799	334.448	0.0209621	80.268	0.0104374	668.896	0.0214614	4013.38	0.0503616
82.274	0.0105762	178.261	0.0174139	95.987	0.0132438	95.987	0.013091	342.809	0.0220121	82.274	0.0102714	685.619	0.0238534	4113.71	0.0516026
84.281	0.0104862	182.609	0.0174239	98.328	0.0126518	98.328	0.012891	351.171	0.0218511	84.281	0.0100494	702.341	0.0234934	4214.05	0.0464986
86.288	0.0100552	186.957	0.0173849	100.669	0.0125308	100.669	0.01275	359.532	0.0206121	86.288	0.00986444	719.064	0.0225924	4314.38	0.0498216
88.294	0.0104552	191.304	0.0162849	103.01	0.0122428	103.01	0.013101	367.893	0.0206081	88.294	0.0102534	735.786	0.0225404	4414.72	0.0490846
90.301	0.00948322	195.652	0.0164739	105.351	0.0129158	105.351	0.01231	376.254	0.0206231	90.301	0.00945544	752.508	0.0228704	4515.05	0.0512546
92.308	0.00989322	200	0.0152039	107.692	0.0118928	107.692	0.0123	384.615	0.0202611	92.308	0.00953744	769.231	0.0233764	4615.38	0.0516516
94.314	0.00992722	204.348	0.0146589	110.033	0.0118088	110.033	0.012343	392.977	0.0201651	94.314	0.00924644	785.953	0.0232324	4715.72	0.0481476
96.321	0.00934022	208.696	0.0162369	112.375	0.0120058	112.375	0.011299	401.338	0.0212111	96.321	0.00908144	802.676	0.0219074	4816.05	0.0455476
98.328	0.00936222	213.043	0.0147339	114.716	0.0116768	114.716	0.011465	409.699	0.0185191	98.328	0.00897844	819.398	0.0221214	4916.39	0.0454836
100.334	0.00930722	217.391	0.0153119	117.057	0.0112858	117.057	0.010731	418.06	0.0187151	100.334	0.00882444	836.12	0.0203594	5016.72	0.0467756
102.341	0.00892222	221.739	0.0150839	119.398	0.0111588	119.398	0.011147	426.421	0.0191931	102.341	0.00821844	852.843	0.0200974	5117.06	0.0475126
104.348	0.00896322	226.087	0.0144459	121.739	0.0107848	121.739	0.010323	434.783	0.0186961	104.348	0.00810544	869.565	0.0199474	5217.39	0.0455616
106.355	0.00897422	230.435	0.0140079	124.08	0.0113598	124.08	0.010932	443.144	0.0187481	106.355	0.00889444	886.288	0.0192044	5317.73	0.0461556
108.361	0.00860122	234.783	0.0151239	126.421	0.0111448	126.421	0.011054	451.505	0.0187581	108.361	0.00841044	903.01	0.0201934	5418.06	0.0440136
110.368	0.00774222	239.13	0.0144259	128.763	0.0107838	128.763	0.010606	459.866	0.0186121	110.368	0.00816744	919.732	0.0188754	5518.4	0.0400006
112.375	0.00893522	243.478	0.0134939	131.104	0.0106188	131.104	0.010306	468.227	0.0186591	112.375	0.00775944	936.455	0.0184474	5618.73	0.0429556
114.381	0.00794322	247.826	0.0134169	133.445	0.0108058	133.445	0.011292	476.589	0.0177251	114.381	0.00800344	953.177	0.0184124	5719.06	0.0430296
116.388	0.00855822	252.174	0.0139089	135.786	0.0104398	135.786	0.010002	484.95	0.0185331	116.388	0.00795044	969.9	0.0190474	5819.4	0.0394346
118.395	0.00835522	256.522	0.0136839	138.127	0.0103388	138.127	0.010307	493.311	0.0175171	118.395	0.00836444	986.622	0.0166114	5919.73	0.0411486
120.401	0.00786722	260.87	0.0129089	140.468	0.00904078	140.468	0.009519	501.672	0.0175651	120.401	0.00817644	1003.34	0.0187964	6020.07	0.0434686
122.408	0.00745222	265.217	0.0138489	142.809	0.0104608	142.809	0.010171	510.033	0.0173231	122.408	0.00801144	1020.07	0.0169004	6120.4	0.0419016
124.415	0.00751622	269.565	0.0130679	145.151	0.0109298	145.151	0.010365	518.395	0.0170101	124.415	0.00778144	1036.79	0.0171034	6220.74	0.0414576
126.421	0.00753122	273.913	0.0128479	147.492	0.0101988	147.492	0.009625	526.756	0.0167081	126.421	0.00769844	1053.51	0.0165824	6321.07	0.0415756
128.428	0.00798222	278.261	0.0137859	149.833	0.00993478	149.833	0.00967	535.117	0.0172601	128.428	0.00751544	1070.23	0.0166834	6421.4	0.0406896
130.435	0.00772322	282.609	0.0129659	152.174	0.00978278	152.174	0.009253	543.478	0.0171331	130.435	0.00759444	1086.96	0.0159634	6521.74	0.0393496
132.441	0.00759822	286.957	0.0124929	154.515	0.00916578	154.515	0.010263	551.839	0.0158271	132.441	0.00692644	1103.68	0.0162254	6622.07	0.0400886
134.448	0.00754522	291.304	0.0126759	156.856	0.00970278	156.856	0.009414	560.201	0.0166471	134.448	0.00648044	1120.4	0.0167024	6722.41	0.0395516
136.455	0.00702722	295.652	0.0118809	159.197	0.00907978	159.197	0.008725	568.562	0.0169671	136.455	0.00702444	1137.12	0.0158224	6822.74	0.0404846
138.462	0.00728822	300	0.0124129	161.538	0.00974878	161.538	0.008903	576.923	0.0166561	138.462	0.00746144	1153.85	0.0155114	6923.08	0.0394236
140.468	0.00644122	304.348	0.0124089	163.88	0.00980978	163.88	0.009155	585.284	0.0166261	140.468	0.00678444	1170.57	0.0158064	7023.41	0.0375476
142.475	0.00725422	308.696	0.0112439	166.221	0.00926178	166.221	0.008781	593.645	0.0160101	142.475	0.00635444	1187.29	0.0149454	7123.75	0.0385026
144.482	0.00657722	313.043	0.0118679	168.562	0.0103428	168.562	0.008819	602.007	0.0159711	144.482	0.00708044	1204.01	0.0147964	7224.08	0.0369686
146.488	0.00722822	317.391	0.0117219	170.903	0.00886178	170.903	0.008782	610.368	0.0151451	146.488	0.00710744	1220.74	0.0146644	7324.42	0.0381876
148.495	0.00637022	321.739	0.0113779	173.244	0.00891578	173.244	0.008524	618.729	0.0155091	148.495	0.00705644	1237.46	0.0149674	7424.75	0.0378046
150.502	0.00694422	326.087	0.0111459	175.585	0.00913178	175.585	0.0088	627.09	0.0154521	150.502	0.00709044	1254.18	0.0156164	7525.08	0.0377486
152.508	0.00620022	330.435	0.0119259	177.926	0.00872278	177.926	0.008772	635.452	0.0153421	152.508	0.00641144	1270.9	0.0151624	7625.42	0.0388986
154.515	0.00647422	334.783	0.0112089	180.268	0.00946978	180.268	0.008971	643.813	0.0162911	154.515	0.00676544	1287.62	0.0149474	7725.75	0.0341556
156.522	0.00616722	339.13	0.0114659	182.609	0.00880378	182.609	0.008631	652.174	0.0148281	156.522	0.00639144	1304.35	0.0137424	7826.09	0.0366856
158.528	0.00616022	343.478	0.0113259	184.95	0.00828978	184.95	0.008451	660.535	0.0148961	158.528	0.00645844	1321.07	0.0139864	7926.42	0.0340156
160.535	0.00552722	347.826	0.0111579	187.291	0.00889678	187.291	0.008764	668.896	0.0138391	160.535	0.00582544	1337.79	0.0135494	8026.76	0.0364546
162.542	0.00630522	352.174	0.0111429	189.632	0.00859078	189.632	0.008694	677.258	0.0143611	162.542	0.00599344	1354.52	0.0143404	8127.09	0.0351556
164.548	0.00573522	356.522	0.0105959	191.973	0.00841378	191.973	0.008042	685.619	0.0151201	164.548	0.00637544	1371.24	0.0135974	8227.42	0.0334736
166.555	0.00622022	360.87	0.0115469	194.314	0.00836578	194.314	0.008479	693.98	0.0151621	166.555	0.00594044	1387.96	0.0129694	8327.76	0.0327846
168.562	0.00596722	365.217	0.0108349	196.656	0.00815578	196.656	0.008112	702.341	0.0148711	168.562	0.00556944	1404.68	0.0131754	8428.09	0.0331716
170.569	0.00564522	369.565	0.0106829	198.997	0.00827678	198.997	0.007926	710.702	0.0135671	170.569	0.00628044	1421.41	0.0133364	8528.43	0.0328186
172.575	0.00582822	373.913	0.0108289	201.338	0.00718478	201.338	0.007916	719.064	0.0140471	172.575	0.00587044	1438.13	0.0123634	8628.76	0.0333876
174.582	0.00575622	378.261	0.0103079	203.679	0.00803478	203.679	0.007605	727.425	0.0137891	174.582	0.00574444	1454.85	0.0131304	8729.1	0.0327756
176.589	0.00540722	382.609	0.0104659	206.02	0.00776078	206.02	0.007966	735.786	0.0138051	176.589	0.00599844	1471.57	0.0123374	8829.43	0.0324686
178.595	0.00562822	386.957	0.0101049	208.361	0.00778378	208.361	0.007762	744.147	0.0136701	178.595	0.00584944	1488.29	0.0119514	8929.77	0.0317116
180.602	0.00520822	391.304	0.0104369	210.702	0.00803378	210.702	0.007083	752.508	0.0129751	180.602	0.00567444	1505.02	0.0111914	9030.1	0.0323656
182.609	0.00510522	395.652	0.00943189	213.043	0.00800578	213.043	0.007809	760.87	0.0128021	182.609	0.00540144	1521.74	0.0119234	9130.43	0.0335906
184.615	0.00530522	400	0.00933689	215.385	0.00722578	215.385	0.007194	769.231	0.0131181	184.615	0.00560844	1538.46	0.0122764	9230.77	0.0320926
186.622	0.00529822	404.348	0.00983889	217.726	0.00769478	217.726	0.007254	777.592	0.0132851	186.622	0.00554844	1555.18	0.0119034	9331.1	0.0293776
188.629	0.00519522	408.696	0.00946189	220.067	0.00735478	220.067	0.007456	785.953	0.0133661	188.629	0.00564844	1571.91	0.0122914	9431.44	0.0317726
190.635	0.00514622	413.043	0.00953689	222.408	0.00786078	222.408	0.007273	794.314	0.0128521	190.635	0.00594444	1588.63	0.0115164	9531.77	0.0317106
192.642	0.00531722	417.391	0.00995789	224.749	0.00746478	224.749	0.007231	802.676	0.0126271	192.642	0.00555844	1605.35	0.0110454	9632.11	0.0321986
194.649	0.00535522	421.739	0.00875489	227.09	0.00718278	227.09	0.007472	811.037	0.0131071	194.649	0.00566144	1622.07	0.0109824	9732.44	0.0294706
196.656	0.00452622	426.087	0.00958589	229.431	0.00698978	229.431	0.006567	819.398	0.0119481	196.656	0.00511444	1638.8	0.0117204	9832.78	0.0292076
198.662	0.00505722	430.435	0.00884889	231.773	0.00724678	231.773	0.006983	827.759	0.0124471	198.662	0.00511344	1655.52	0.0113024	9933.11	0.0286636
200.669	0.00495522	434.783	0.00971589	234.114	0.00704878	234.114	0.007214	836.12	0.0118391	200.669	0.00501144	1672.24	0.0113664	10033.4	0.0298346
202.676	0.00498822	439.13	0.00889289	236.455	0.00720578	236.455	0.006776	844.482	0.0109761	202.676	0.00508944	1688.96	0.0109434	10133.8	0.0284246
204.682	0.00468322	443.478	0.00947689	238.796	0.00757378	238.796	0.006559	852.843	0.0118271	204.682	0.00480744	1705.69	0.0107264	10234.1	0.0277336
206.689	0.00472622	447.826	0.00908489	241.137	0.00689278	241.137	0.00662	861.204	0.0121171	206.689	0.00506144	1722.41	0.0114554	10334.4	0.0290056
208.696	0.00453422	452.174	0.00885189	243.478	0.00689678	243.478	0.006671	869.565	0.0109451	208.696	0.00542744	1739.13	0.0103944	10434.8	0.0279906
210.702	0.00457822	456.522	0.00880789	245.819	0.00683878	245.819	0.006696	877.926	0.0116721	210.702	0.00480744	1755.85	0.0104274	10535.1	0.0272596
212.709	0.00443222	460.87	0.00846189	248.161	0.00683478	248.161	0.006451	886.288	0.0121101	212.709	0.00511144	1772.57	0.0106204	10635.5	0.0261006
214.716	0.00470122	465.217	0.00919789	250.502	0.00704078	250.502	0.006337	894.649	0.0103771	214.716	0.00490544	1789.3	0.0103104	10735.8	0.0257516
216.722	0.00391622	469.565	0.00909789	252.843	0.00611578	252.843	0.005955	903.01	0.0111291	216.722	0.00491544	1806.02	0.0108374	10836.1	0.0264256
218.729	0.00418522	473.913	0.00925189	255.184	0.00684578	255.184	0.006451	911.371	0.0108961	218.729	0.00464944	1822.74	0.0101694	10936.5	0.0256916
220.736	0.00415822	478.261	0.00856889	257.525	0.00697278	257.525	0.006923	919.732	0.0114371	220.736	0.00472644	1839.46	0.00947544	11036.8	0.0264906
222.742	0.00441722	482.609	0.00837889	259.866	0.00614278	259.866	0.006555	928.094	0.0111671	222.742	0.00453744	1856.19	0.0105054	11137.1	0.0249056
224.749	0.00428222	486.957	0.00822789	262.207	0.00638978	262.207	0.005751	936.455	0.0112651	224.749	0.00486144	1872.91	0.0106224	11237.5	0.0258996
226.756	0.00421722	491.304	0.00823189	264.548	0.00668578	264.548	0.006303	944.816	0.0109731	226.756	0.00487944	1889.63	0.00893344	11337.8	0.0256246
228.763	0.00434022	495.652	0.00870189	266.89	0.00655178	266.89	0.006342	953.177	0.0107211	228.763	0.00433944	1906.35	0.00935344	11438.1	0.0260626
230.769	0.00378022	500	0.00874489	269.231	0.00657178	269.231	0.005702	961.538	0.0108271	230.769	0.00491444	1923.08	0.00957344	11538.5	0.0234126
232.776	0.00393322	504.348	0.00893189	271.572	0.00620078	271.572	0.00603	969.9	0.0103361	232.776	0.00451644	1939.8	0.00899744	11638.8	0.0250706
234.783	0.00425222	508.696	0.00875689	273.913	0.00641078	273.913	0.005677	978.261	0.0104451	234.783	0.00461344	1956.52	0.00933744	11739.1	0.0238856
236.789	0.00384522	513.043	0.00801289	276.254	0.00548378	276.254	0.006074	986.622	0.0107121	236.789	0.00433344	1973.24	0.00906444	11839.5	0.0246196
238.796	0.00377122	517.391	0.00780489	278.595	0.00649878	278.595	0.005819	994.983	0.0102911	238.796	0.00428544	1989.97	0.00925344	11939.8	0.0242426
240.803	0.00350122	521.739	0.00789689	280.936	0.00639478	280.936	0.005886	1003.34	0.00950711	240.803	0.00423744	2006.69	0.00960544	12040.1	0.0230256
242.809	0.00383222	526.087	0.00807189	283.278	0.00563178	283.278	0.005721	1011.71	0.00964611	242.809	0.00435044	2023.41	0.00861744	12140.5	0.0230846
244.816	0.00356022	530.435	0.00709889	285.619	0.00568978	285.619	0.005503	1020.07	0.0108021	244.816	0.00419544	2040.13	0.00878244	12240.8	0.0221096
246.823	0.00333722	534.783	0.00730689	287.96	0.00622078	287.96	0.005951	1028.43	0.00945811	246.823	0.00397044	2056.86	0.00875144	12341.1	0.0225506
248.829	0.00347822	539.13	0.00789189	290.301	0.00591478	290.301	0.005861	1036.79	0.0101991	248.829	0.00378444	2073.58	0.00871544	12441.5	0.0224126
250.836	0.00377122	543.478	0.00779789	292.642	0.00559678	292.642	0.005855	1045.15	0.00960711	250.836	0.00409444	2090.3	0.00864944	12541.8	0.0231696
252.843	0.00350222	547.826	0.00772289	294.983	0.00584178	294.983	0.006079	1053.51	0.00929811	252.843	0.00400544	2107.02	0.00831744	12642.1	0.0233976
254.849	0.00316422	552.174	0.00742689	297.324	0.00603378	297.324	0.005537	1061.87	0.00936611	254.849	0.00385744	2123.75	0.00928144	12742.5	0.0215686
256.856	0.00353122	556.522	0.00769689	299.666	0.00587478	299.666	0.005531	1070.23	0.0100521	256.856	0.00431544	2140.47	0.00873244	12842.8	0.0220536
258.863	0.00342022	560.87	0.00815689	302.007	0.00556678	302.007	0.005801	1078.59	0.0101411	258.863	0.00390044	2157.19	0.00888344	12943.1	0.0224916
260.87	0.00355122	565.217	0.00743889	304.348	0.00551578	304.348	0.005404	1086.96	0.00917011	260.87	0.00431344	2173.91	0.00818344	13043.5	0.0216376
262.876	0.00351122	569.565	0.00734189	306.689	0.00569678	306.689	0.005403	1095.32	0.00978211	262.876	0.00357144	2190.64	0.00855544	13143.8	0.0215326
264.883	0.00340822	573.913	0.00713889	309.03	0.00558378	309.03	0.005244	1103.68	0.00974211	264.883	0.00384644	2207.36	0.00776944	13244.1	0.0209876
266.89	0.00305022	578.261	0.00768389	311.371	0.00538278	311.371	0.005456	1112.04	0.00922511	266.89	0.00353044	2224.08	0.00794244	13344.5	0.0199546
268.896	0.00346222	582.609	0.00805889	313.712	0.00487478	313.712	0.005232	1120.4	0.00907911	268.896	0.00365844	2240.8	0.00801544	13444.8	0.0202756
270.903	0.00336122	586.957	0.00699189	316.054	0.00502478	316.054	0.005204	1128.76	0.00938111	270.903	0.00378144	2257.52	0.00785044	13545.2	0.0208996
272.91	0.00320822	591.304	0.00745489	318.395	0.00558978	318.395	0.005213	1137.12	0.0100901	272.91	0.00382944	2274.25	0.00776644	13645.5	0.0200546
274.916	0.00322222	595.652	0.00684589	320.736	0.00522278	320.736	0.005224	1145.48	0.00896711	274.916	0.00402744	2290.97	0.00780044	13745.8	0.0212596
276.923	0.00318522	600	0.00718689	323.077	0.00490578	323.077	0.004965	1153.85	0.00917011	276.923	0.00373744	2307.69	0.00796044	13846.2	0.0195546
278.93	0.00305222	604.348	0.00687489	325.418	0.00517578	325.418	0.005256	1162.21	0.00905611	278.93	0.00389144	2324.42	0.00803544	13946.5	0.0198576
280.936	0.00307222	608.696	0.00690089	327.759	0.00529378	327.759	0.004784	1170.57	0.00909311	280.936	0.00351944	2341.14	0.00778944	14046.8	0.0195516
282.943	0.00297022	613.043	0.00688489	330.1	0.00492178	330.1	0.005022	1178.93	0.00902211	282.943	0.00346044	2357.86	0.00732444	14147.2	0.0205446
284.95	0.00288222	617.391	0.00617689	332.441	0.00478678	332.441	0.005304	1187.29	0.00885111	284.95	0.00330444	2374.58	0.00763644	14247.5	0.0193236
286.957	0.00274022	621.739	0.00658589	334.783	0.00521378	334.783	0.005155	1195.65	0.00938111	286.957	0.00338044	2391.3	0.00763244	14347.8	0.0192756
288.963	0.00299322	626.087	0.00685189	337.124	0.00506878	337.124	0.004737	1204.01	0.00901711	288.963	0.00343644	2408.03	0.00698544	14448.2	0.0189096
290.97	0.00275822	630.435	0.00674889	339.465	0.00509878	339.465	0.004814	1212.38	0.00882611	290.97	0.00345844	2424.75	0.00749944	14548.5	0.0178236
292.977	0.00277522	634.783	0.00696289	341.806	0.00464078	341.806	0.004909	1220.74	0.00842911	292.977	0.00331044	2441.47	0.00719144	14648.8	0.0191306
294.983	0.00259422	639.13	0.00703889	344.147	0.00528878	344.147	0.004546	1229.1	0.00801611	294.983	0.00325744	2458.19	0.00754144	14749.2	0.0179316
296.99	0.00283222	643.478	0.00668889	346.488	0.00503178	346.488	0.004604	1237.46	0.00830911	296.99	0.00351044	2474.92	0.00718944	14849.5	0.0173386
298.997	0.00289822	647.826	0.00667189	348.829	0.00475978	348.829	0.004703	1245.82	0.00854611	298.997	0.00332044	2491.64	0.00778344	14949.8	0.0179646
301.003	0.00287822	652.174	0.00627689	351.171	0.00454678	351.171	0.004632	1254.18	0.00794211	301.003	0.00340944	2508.36	0.00717544	15050.2	0.0174106
303.01	0.00271122	656.522	0.00649389	353.512	0.00460578	353.512	0.004343	1262.54	0.00800611	303.01	0.00362944	2525.08	0.00677444	15150.5	0.0178086
305.017	0.00279222	660.87	0.00618389	355.853	0.00469678	355.853	0.00454	1270.9	0.00835511	305.017	0.00306144	2541.81	0.00699344	15250.8	0.0169886
307.023	0.00275822	665.217	0.00634589	358.194	0.00488678	358.194	0.00472	1279.26	0.00852111	307.023	0.00307144	2558.53	0.00692444	15351.2	0.0171146
309.03	0.00277722	669.565	0.00655789	360.535	0.00462378	360.535	0.004543	1287.62	0.00889111	309.03	0.00327744	2575.25	0.00708544	15451.5	0.0166376
311.037	0.00253022	673.913	0.00647489	362.876	0.00423578	362.876	0.004789	1295.99	0.00800911	311.037	0.00296744	2591.97	0.00662544	15551.8	0.0180186
313.043	0.00242522	678.261	0.00626889	365.217	0.00462678	365.217	0.004416	1304.35	0.00753111	313.043	0.00341044	2608.7	0.00670444	15652.2	0.0168836
315.05	0.00266022	682.609	0.00654189	367.559	0.00480678	367.559	0.004206	1312.71	0.00870011	315.05	0.00295944	2625.42	0.00719544	15752.5	0.0162426
317.057	0.00258322	686.957	0.00629789	369.9	0.00448178	369.9	0.004157	1321.07	0.00766611	317.057	0.00295544	2642.14	0.00673044	15852.8	0.0165006
319.064	0.00242122	691.304	0.00618089	372.241	0.00482278	372.241	0.004506	1329.43	0.00777111	319.064	0.00304544	2658.86	0.00653444	15953.2	0.0174456
321.07	0.00230122	695.652	0.00649389	374.582	0.00446278	374.582	0.004037	1337.79	0.00744011	321.07	0.00296844	2675.58	0.00665544	16053.5	0.0145736
323.077	0.00235422	700	0.00656389	376.923	0.00430278	376.923	0.004273	1346.15	0.00791311	323.077	0.00279844	2692.31	0.00646744	16153.8	0.0163986
325.084	0.00247322	704.348	0.00611889	379.264	0.00415478	379.264	0.004236	1354.52	0.00797611	325.084	0.00307744	2709.03	0.00670344	16254.2	0.0159586
327.09	0.00251622	708.696	0.00590689	381.605	0.00453478	381.605	0.004136	1362.88	0.00760111	327.09	0.00293944	2725.75	0.00622244	16354.5	0.0163026
329.097	0.00238722	713.043	0.00611689	383.946	0.00462278	383.946	0.004241	1371.24	0.00749511	329.097	0.00301644	2742.48	0.00637344	16454.8	0.0155406
331.104	0.00234422	717.391	0.00625689	386.288	0.00424478	386.288	0.004243	1379.6	0.00763111	331.104	0.00294344	2759.2	0.00638344	16555.2	0.0142126
333.11	0.00223522	721.739	0.00587489	388.629	0.00452478	388.629	0.00422	1387.96	0.00762911	333.11	0.00267944	2775.92	0.00607144	16655.5	0.0147036
335.117	0.00221622	726.087	0.00638689	390.97	0.00445178	390.97	0.004231	1396.32	0.00737811	335.117	0.00286444	2792.64	0.00631044	16755.9	0.0158906
337.124	0.00233822	730.435	0.00593889	393.311	0.00441978	393.311	0.003936	1404.68	0.00794211	337.124	0.00297844	2809.36	0.00615644	16856.2	0.0147636
339.13	0.00206222	734.783	0.00581389	395.652	0.00429678	395.652	0.004443	1413.04	0.00747711	339.13	0.00270044	2826.09	0.00639344	16956.5	0.0147696
341.137	0.00238422	739.13	0.00561789	397.993	0.00423278	397.993	0.004131	1421.41	0.00722911	341.137	0.00256944	2842.81	0.00584544	17056.9	0.0149876
343.144	0.00206122	743.478	0.00575389	400.334	0.00409678	400.334	0.003963	1429.77	0.00748011	343.144	0.00281144	2859.53	0.00657344	17157.2	0.0146686
345.151	0.00233322	747.826	0.00590289	402.676	0.00381878	402.676	0.003772	1438.13	0.00718511	345.151	0.00275544	2876.25	0.00599744	17257.5	0.0137486
347.157	0.00201622	752.174	0.00574489	405.017	0.00460978	405.017	0.003937	1446.49	0.00735711	347.157	0.00267844	2892.98	0.00595344	17357.9	0.0146236
349.164	0.00220622	756.522	0.00589289	407.358	0.00401078	407.358	0.003901	1454.85	0.00734811	349.164	0.00271044	2909.7	0.00582744	17458.2	0.0148036
351.171	0.00225322	760.87	0.00584689	409.699	0.00417178	409.699	0.003904	1463.21	0.00712711	351.171	0.00275544	2926.42	0.00622244	17558.5	0.0144436
353.177	0.00199222	765.217	0.00577889	412.04	0.00403278	412.04	0.003801	1471.57	0.00647511	353.177	0.00221644	2943.14	0.00604044	17658.9	0.0143426
355.184	0.00199122	769.565	0.00567189	414.381	0.00386278	414.381	0.003532	1479.93	0.00707311	355.184	0.00232344	2959.87	0.00638044	17759.2	0.0138986
357.191	0.00190422	773.913	0.00545689	416.722	0.00390678	416.722	0.003937	1488.29	0.00690011	357.191	0.00246044	2976.59	0.00610944	17859.5	0.0136736
359.197	0.00210222	778.261	0.00571389	419.064	0.00377878	419.064	0.003745	1496.66	0.00660511	359.197	0.00252844	2993.31	0.00612444	17959.9	0.0144456
361.204	0.00206222	782.609	0.00525889	421.405	0.00412478	421.405	0.003824	1505.02	0.00675811	361.204	0.00244444	3010.03	0.00615144	18060.2	0.0126216
363.211	0.00217022	786.957	0.00544689	423.746	0.00372678	423.746	0.003636	1513.38	0.00675511	363.211	0.00239944	3026.76	0.00555244	18160.5	0.0136196
365.217	0.00200522	791.304	0.00541789	426.087	0.00385678	426.087	0.003959	1521.74	0.00672111	365.217	0.00264044	3043.48	0.00616144	18260.9	0.0130216
367.224	0.00193322	795.652	0.00555489	428.428	0.00362578	428.428	0.003503	1530.1	0.00673711	367.224	0.00247644	3060.2	0.00594044	18361.2	0.0129426
369.231	0.00190122	800	0.00537289	430.769	0.00415878	430.769	0.003876	1538.46	0.00666811	369.231	0.00241944	3076.92	0.00547944	18461.5	0.0126856
371.237	0.00174522	804.348	0.00476589	433.11	0.00364078	433.11	0.003755	1546.82	0.00711511	371.237	0.00231144	3093.65	0.00576544	18561.9	0.0128096
373.244	0.00203622	808.696	0.00543289	435.452	0.00369678	435.452	0.003514	1555.18	0.00679211	373.244	0.00258944	3110.37	0.00575344	18662.2	0.0135296
375.251	0.00176122	813.043	0.00487189	437.793	0.00355378	437.793	0.003447	1563.55	0.00664611	375.251	0.00229644	3127.09	0.00537644	18762.5	0.0130336
377.258	0.00171122	817.391	0.00485389	440.134	0.00331878	440.134	0.003577	1571.91	0.00636611	377.258	0.00242144	3143.81	0.00529744	18862.9	0.0130006
379.264	0.00170522	821.739	0.00520689	442.475	0.00352978	442.475	0.003499	1580.27	0.00662911	379.264	0.00243144	3160.53	0.00563544	18963.2	0.0126996
381.271	0.00200822	826.087	0.00520589	444.816	0.00357178	444.816	0.003465	1588.63	0.00671711	381.271	0.00220644	3177.26	0.00509044	19063.5	0.0123796
383.278	0.00172822	830.435	0.00528289	447.157	0.00377678	447.157	0.003395	1596.99	0.00642711	383.278	0.00229944	3193.98	0.00541644	19163.9	0.0118076
385.284	0.00213222	834.783	0.00507389	449.498	0.00369078	449.498	0.003524	1605.35	0.00710511	385.284	0.00224944	3210.7	0.00568244	19264.2	0.0126606
387.291	0.00172422	839.13	0.00505689	451.839	0.00375578	451.839	0.003321	1613.71	0.00654511	387.291	0.00209944	3227.43	0.00571944	19364.5	0.0128986
389.298	0.00172022	843.478	0.00482589	454.181	0.00315378	454.181	0.003383	1622.07	0.00646611	389.298	0.00231544	3244.15	0.00507944	19464.9	0.0123676
391.304	0.00165622	847.826	0.00477089	456.522	0.00319978	456.522	0.003354	1630.44	0.00612511	391.304	0.00219144	3260.87	0.00519944	19565.2	0.0123306
393.311	0.00172322	852.174	0.00472589	458.863	0.00354578	458.863	0.003392	1638.8	0.00624611	393.311	0.00208744	3277.59	0.00575444	19665.6	0.0115436
395.318	0.00164422	856.522	0.00481089	461.204	0.00312278	461.204	0.003615	1647.16	0.00629711	395.318	0.00212544	3294.31	0.00529244	19765.9	0.0114886
397.324	0.00149322	860.87	0.00494789	463.545	0.00356278	463.545	0.003459	1655.52	0.00632711	397.324	0.00228744	3311.04	0.00509644	19866.2	0.0110206
399.331	0.00182022	865.217	0.00510489	465.886	0.00349178	465.886	0.003214	1663.88	0.00664611	399.331	0.00224644	3327.76	0.00533444	19966.6	0.0112796
401.338	0.00148522	869.565	0.00482189	468.227	0.00355978	468.227	0.003221	1672.24	0.00589311	401.338	0.00235744	3344.48	0.00507644	20066.9	0.0119926
403.344	0.00166522	873.913	0.00450289	470.569	0.00359578	470.569	0.00321	1680.6	0.00573211	403.344	0.00220744	3361.2	0.00518744
405.351	0.00182522	878.261	0.00471589	472.91	0.00328078	472.91	0.003112	1688.96	0.00628111	405.351	0.00201344	3377.93	0.00514644
407.358	0.00151722	882.609	0.00461189	475.251	0.00357178	475.251	0.003362	1697.32	0.00611611	407.358	0.00243344	3394.65	0.00536544
409.365	0.00164522	886.957	0.00455289	477.592	0.00365278	477.592	0.002873	1705.69	0.00607811	409.365	0.00233544	3411.37	0.00518544
411.371	0.00171222	891.304	0.00451289	479.933	0.00320578	479.933	0.003205	1714.05	0.00610011	411.371	0.00203944	3428.09	0.00524044
413.378	0.00156722	895.652	0.00460389	482.274	0.00347278	482.274	0.003062	1722.41	0.00577811	413.378	0.00220944	3444.82	0.00529644
415.385	0.00149522	900	0.00444889	484.615	0.00347278	484.615	0.003167	1730.77	0.00566911	415.385	0.00212644	3461.54	0.00506744
417.391	0.00177022	904.348	0.00434289	486.957	0.00344978	486.957	0.002843	1739.13	0.00611511	417.391	0.00207344	3478.26	0.00500444
419.398	0.00169422	908.696	0.00458889	489.298	0.00329878	489.298	0.003237	1747.49	0.00604311	419.398	0.00191044	3494.98	0.00462444
421.405	0.00155322	913.043	0.00409889	491.639	0.00309078	491.639	0.003091	1755.85	0.00583611	421.405	0.00182044	3511.71	0.00526544
423.411	0.00140222	917.391	0.00421489	493.98	0.00302478	493.98	0.002994	1764.21	0.00568011	423.411	0.00192844	3528.43	0.00463544
425.418	0.00140422	921.739	0.00429089	496.321	0.00287278	496.321	0.003271	1772.57	0.00570011	425.418	0.00171844	3545.15	0.00484544
427.425	0.00144522	926.087	0.00451789	498.662	0.00345378	498.662	0.00303	1780.94	0.00560211	427.425	0.00194544	3561.87	0.00504144
429.431	0.00141622	930.435	0.00405089	501.003	0.00307578	501.003	0.003063	1789.3	0.00584211	429.431	0.00196044	3578.59	0.00489044
431.438	0.00137822	934.783	0.00441089	503.344	0.00332078	503.344	0.002745	1797.66	0.00586711	431.438	0.00208444	3595.32	0.00467344
433.445	0.00156722	939.13	0.00445289	505.686	0.00326178	505.686	0.003182	1806.02	0.00553611	433.445	0.00178344	3612.04	0.00425444
435.452	0.00131022	943.478	0.00411089	508.027	0.00323678	508.027	0.003	1814.38	0.00544611	435.452	0.00184744	3628.76	0.00406044
437.458	0.00145722	947.826	0.00445889	510.368	0.00303578	510.368	0.002933	1822.74	0.00588711	437.458	0.00185644	3645.49	0.00503144
439.465	0.00143222	952.174	0.00405189	512.709	0.00309978	512.709	0.002835	1831.1	0.00543011	439.465	0.00186044	3662.21	0.00458944
441.472	0.00137122	956.522	0.00403589	515.05	0.00290978	515.05	0.003015	1839.46	0.00533311	441.472	0.00191344	3678.93	0.00436444
443.478	0.00121222	960.87	0.00387489	517.391	0.00296878	517.391	0.00278	1847.83	0.00553611	443.478	0.00186344	3695.65	0.00488544
445.485	0.00124322	965.217	0.00414889	519.732	0.00277278	519.732	0.002883	1856.19	0.00575811	445.485	0.00190644	3712.38	0.00462244
447.492	0.00124422	969.565	0.00426589	522.074	0.00296578	522.074	0.00288	1864.55	0.00541911	447.492	0.00168744	3729.1	0.00460044
449.498	0.00130822	973.913	0.00420089	524.415	0.00297578	524.415	0.002803	1872.91	0.00542611	449.498	0.00157744	3745.82	0.00473044
451.505	0.00150022	978.261	0.00398189	526.756	0.00282178	526.756	0.002953	1881.27	0.00544711	451.505	0.00181744	3762.54	0.00414644
453.512	0.00126822	982.609	0.00408589	529.097	0.00282678	529.097	0.002786	1889.63	0.00539611	453.512	0.00151044	3779.26	0.00396344
455.518	0.00150122	986.957	0.00385189	531.438	0.00271378	531.438	0.002876	1897.99	0.00543311	455.518	0.00160644	3795.99	0.00452344
457.525	0.00143022	991.304	0.00410189	533.779	0.00288378	533.779	0.002615	1906.35	0.00525011	457.525	0.00165844	3812.71	0.00410344
459.532	0.00129522	995.652	0.00386189	536.12	0.00280978	536.12	0.002829	1914.72	0.00499211	459.532	0.00175444	3829.43	0.00429044
461.538	0.00133822	1000	0.00369889	538.462	0.00269178	538.462	0.002572	1923.08	0.00533711	461.538	0.00157544	3846.15	0.00444544
463.545	0.00124522	1004.35	0.00370189	540.803	0.00284678	540.803	0.003092	1931.44	0.00534211	463.545	0.00173844	3862.88	0.00443544
465.552	0.00122722	1008.7	0.00395389	543.144	0.00283578	543.144	0.002601	1939.8	0.00578711	465.552	0.00175044	3879.6	0.00434444
467.559	0.00117322	1013.04	0.00373889	545.485	0.00276378	545.485	0.002764	1948.16	0.00510911	467.559	0.00145744	3896.32	0.00438544
469.565	0.00122622	1017.39	0.00368089	547.826	0.00270478	547.826	0.002729	1956.52	0.00553611	469.565	0.00166344	3913.04	0.00434344
471.572	0.00125522	1021.74	0.00361689	550.167	0.00257978	550.167	0.002884	1964.88	0.00477911	471.572	0.00186344	3929.77	0.00412744
473.579	0.00119522	1026.09	0.00361189	552.508	0.00256078	552.508	0.002255	1973.24	0.00540711	473.579	0.00171344	3946.49	0.00423444
475.585	0.00121522	1030.44	0.00350689	554.849	0.00280378	554.849	0.002514	1981.6	0.00479311	475.585	0.00163744	3963.21	0.00423344
477.592	0.00113722	1034.78	0.00355889	557.191	0.00278478	557.191	0.002471	1989.97	0.00501811	477.592	0.00146344	3979.93	0.00436344
479.599	0.00118222	1039.13	0.00375889	559.532	0.00251378	559.532	0.002462	1998.33	0.00495711	479.599	0.00151944	3996.66	0.00366444
481.605	0.00104522	1043.48	0.00389689	561.873	0.00276078	561.873	0.00252	2006.69	0.00541911	481.605	0.00159744	4013.38	0.00459744
483.612	0.00128422	1047.83	0.00355589	564.214	0.00259478	564.214	0.002663	2015.05	0.00474711	483.612	0.00150744	4030.1	0.00385244
485.619	0.00117522	1052.17	0.00363489	566.555	0.00262678	566.555	0.002747	2023.41	0.00543911	485.619	0.00166344	4046.82	0.00430544
487.625	0.00119022	1056.52	0.00372789	568.896	0.00278078	568.896	0.002607	2031.77	0.00482311	487.625	0.00154644	4063.54	0.00417744
489.632	0.00119522	1060.87	0.00377489	571.237	0.00244678	571.237	0.002559	2040.13	0.00488211	489.632	0.00156744	4080.27	0.00405744
491.639	0.000820222	1065.22	0.00372389	573.579	0.00247278	573.579	0.002259	2048.5	0.00484011	491.639	0.00152344	4096.99	0.00408644
493.645	0.00109622	1069.56	0.00360289	575.92	0.00254478	575.92	0.002343	2056.86	0.00477511	493.645	0.00151644	4113.71	0.00398244
495.652	0.00117222	1073.91	0.00346289	578.261	0.00272278	578.261	0.002381	2065.22	0.00534611	495.652	0.00167544	4130.44	0.00412044
497.659	0.00115322	1078.26	0.00359789	580.602	0.00266578	580.602	0.002457	2073.58	0.00467311	497.659	0.00145444	4147.16	0.00401744
499.666	0.00105722	1082.61	0.00311789	582.943	0.00253378	582.943	0.002383	2081.94	0.00473711	499.666	0.00136444	4163.88	0.00403744
501.672	0.00108422	1086.96	0.00338789	585.284	0.00265978	585.284	0.002283	2090.3	0.00483011	501.672	0.00149944	4180.6	0.00387444
503.679	0.00116422	1091.3	0.00321789	587.625	0.00234678	587.625	0.0024	2098.66	0.00461211	503.679	0.00164344	4197.32	0.00367444
505.686	0.00111822	1095.65	0.00339089	589.967	0.00257878	589.967	0.002265	2107.02	0.00487311	505.686	0.00140344	4214.05	0.00380544
507.692	0.000920222	1100	0.00328689	592.308	0.00239478	592.308	0.002643	2115.39	0.00459211	507.692	0.00154144	4230.77	0.00373644
509.699	0.000960222	1104.35	0.00319589	594.649	0.00247378	594.649	0.002511	2123.75	0.00475611	509.699	0.00148344	4247.49	0.00382044
511.706	0.00103422	1108.7	0.00354089	596.99	0.00242578	596.99	0.00253	2132.11	0.00471311	511.706	0.00137444	4264.21	0.00407344
513.712	0.00101122	1113.04	0.00329589	599.331	0.00269178	599.331	0.002342	2140.47	0.00488511	513.712	0.00145144	4280.94	0.00356744
515.719	0.000983222	1117.39	0.00309889	601.672	0.00221878	601.672	0.002504	2148.83	0.00437611	515.719	0.00140544	4297.66	0.00371444
517.726	0.000956222	1121.74	0.00333689	604.013	0.00225678	604.013	0.002415	2157.19	0.00477511	517.726	0.00151744	4314.38	0.00388344
519.732	0.000887222	1126.09	0.00310389	606.355	0.00231978	606.355	0.002082	2165.55	0.00447811	519.732	0.00149744	4331.1	0.00368244
521.739	0.00101322	1130.44	0.00302889	608.696	0.00249578	608.696	0.002103	2173.91	0.00455811	521.739	0.00132144	4347.83	0.00380644
523.746	0.00102322	1134.78	0.00341589	611.037	0.00261478	611.037	0.002214	2182.27	0.00442711	523.746	0.00134744	4364.55	0.00367644
525.753	0.00105322	1139.13	0.00323189	613.378	0.00228078	613.378	0.002261	2190.64	0.00455711	525.753	0.00124844	4381.27	0.00381744
527.759	0.000830222	1143.48	0.00305889	615.719	0.00238278	615.719	0.002322	2199	0.00436311	527.759	0.00145444	4397.99	0.00365944
529.766	0.000933222	1147.83	0.00310889	618.06	0.00242978	618.06	0.00244	2207.36	0.00454811	529.766	0.00140344	4414.72	0.00366044
531.773	0.000994222	1152.17	0.00325689	620.401	0.00219278	620.401	0.002069	2215.72	0.00419211	531.773	0.00134044	4431.44	0.00358644
533.779	0.000873222	1156.52	0.00282189	622.742	0.00240678	622.742	0.002	2224.08	0.00437911	533.779	0.00130844	4448.16	0.00358644
535.786	0.000985222	1160.87	0.00319189	625.084	0.00213178	625.084	0.002202	2232.44	0.00459011	535.786	0.00127544	4464.88	0.00398444
537.793	0.000828222	1165.22	0.00309089	627.425	0.00229978	627.425	0.002333	2240.8	0.00414611	537.793	0.00142844	4481.6	0.00353544
539.799	0.000982222	1169.56	0.00328089	629.766	0.00208578	629.766	0.002317	2249.16	0.00450011	539.799	0.00152644	4498.33	0.00328644
541.806	0.00102322	1173.91	0.00313089	632.107	0.00209278	632.107	0.002055	2257.52	0.00390611	541.806	0.00151844	4515.05	0.00354144
543.813	0.000848222	1178.26	0.00320389	634.448	0.00216378	634.448	0.002115	2265.89	0.00413511	543.813	0.00136844	4531.77	0.00324044
545.819	0.000914222	1182.61	0.00270889	636.789	0.00205578	636.789	0.002103	2274.25	0.00417811	545.819	0.00129344	4548.5	0.00377144
547.826	0.00105422	1186.96	0.00282689	639.13	0.00227378	639.13	0.00193	2282.61	0.00435711	547.826	0.00116744	4565.22	0.00357644
549.833	0.000981222	1191.3	0.00287689	641.472	0.00225878	641.472	0.002011	2290.97	0.00420611	549.833	0.00131944	4581.94	0.00351344
551.839	0.00102222	1195.65	0.00309089	643.813	0.00214878	643.813	0.002236	2299.33	0.00409911	551.839	0.00103344	4598.66	0.00356044
553.846	0.000805222	1200	0.00303089	646.154	0.00208078	646.154	0.00208	2307.69	0.00411811	553.846	0.00120044	4615.38	0.00362444
555.853	0.000930222	1204.35	0.00298389	648.495	0.00220678	648.495	0.002016	2316.05	0.00429611	555.853	0.00119444	4632.11	0.00364044
557.86	0.000833222	1208.7	0.00295489	650.836	0.00198178	650.836	0.001959	2324.42	0.00414011	557.86	0.00115944	4648.83	0.00365944
559.866	0.000821222	1213.04	0.00256389	653.177	0.00207678	653.177	0.002257	2332.78	0.00410711	559.866	0.00123844	4665.55	0.00338344
561.873	0.000748222	1217.39	0.00299489	655.518	0.00221178	655.518	0.001909	2341.14	0.00404711	561.873	0.00119344	4682.27	0.00357144
563.88	0.000761222	1221.74	0.00289889	657.86	0.00206578	657.86	0.00203	2349.5	0.00432811	563.88	0.00109944	4699	0.00343544
565.886	0.000791222	1226.09	0.00297189	660.201	0.00228478	660.201	0.001803	2357.86	0.00423911	565.886	0.00133344	4715.72	0.00317144
567.893	0.000915222	1230.44	0.00289689	662.542	0.00198578	662.542	0.001809	2366.22	0.00381911	567.893	0.00136344	4732.44	0.00334644
569.9	0.000981222	1234.78	0.00243189	664.883	0.00215178	664.883	0.001873	2374.58	0.00388311	569.9	0.00128744	4749.16	0.00340744
571.906	0.000801222	1239.13	0.00283489	667.224	0.00235178	667.224	0.002002	2382.94	0.00424311	571.906	0.00113144	4765.89	0.00312644
573.913	0.000916222	1243.48	0.00290689	669.565	0.00183578	669.565	0.001812	2391.3	0.00413611	573.913	0.00120044	4782.61	0.00356544
575.92	0.000755222	1247.83	0.00287289	671.906	0.00193478	671.906	0.002034	2399.67	0.00380311	575.92	0.00127444	4799.33	0.00307744
577.926	0.000912222	1252.17	0.00276289	674.247	0.00205178	674.247	0.002107	2408.03	0.00417011	577.926	0.00112744	4816.05	0.00319244
579.933	0.000851222	1256.52	0.00270889	676.589	0.00187078	676.589	0.001892	2416.39	0.00422611	579.933	0.00116644	4832.78	0.00324344
581.94	0.000606222	1260.87	0.00287289	678.93	0.00202878	678.93	0.00186	2424.75	0.00386911	581.94	0.00121944	4849.5	0.00339644
583.946	0.000843222	1265.22	0.00274289	681.271	0.00210078	681.271	0.00179	2433.11	0.00415011	583.946	0.00110844	4866.22	0.00324244
585.953	0.000670222	1269.56	0.00275689	683.612	0.00162678	683.612	0.001933	2441.47	0.00383611	585.953	0.000906444	4882.94	0.00324144
587.96	0.000718222	1273.91	0.00269489	685.953	0.00198878	685.953	0.001906	2449.83	0.00371911	587.96	0.000991444	4899.67	0.00337144
589.967	0.000885222	1278.26	0.00257689	688.294	0.00196078	688.294	0.001952	2458.19	0.00382911	589.967	0.00124644	4916.39	0.00299344
591.973	0.000805222	1282.61	0.00277089	690.635	0.00191478	690.635	0.001936	2466.55	0.00407011	591.973	0.000928444	4933.11	0.00318944
593.98	0.000665222	1286.96	0.00271089	692.977	0.00173278	692.977	0.001924	2474.92	0.00390311	593.98	0.00105944	4949.83	0.00331744
595.987	0.000762222	1291.3	0.00268189	695.318	0.00197578	695.318	0.001835	2483.28	0.00372811	595.987	0.00110544	4966.56	0.00318244
597.993	0.000798222	1295.65	0.00263889	697.659	0.00199578	697.659	0.001731	2491.64	0.00371711	597.993	0.000903444	4983.28	0.00329144
600	0.000596222	1300	0.00256189	700	0.00208678	700	0.001804	2500	0.00378211	600	0.000946444	5000	0.00336244

## Sheet: Dataset 9
HgBr 21092021 1	HgBr 21092021 1	HgBr 21092021 2	HgBr 21092021 2	HgBr 21092021 3	HgBr 21092021 3	HgBr 21092021 4	HgBr 21092021 4	HgBr 21092021 5	HgBr 21092021 5	HgBr 21092021 6	HgBr 21092021 6	HgBr 21092021 7	HgBr 21092021 7	HgBr 21092021 8	HgBr 21092021 8	HgBr 21092021 9	HgBr 21092021 9	HgBr 21092021 10	HgBr 21092021 10	HgBr 21092021 11	HgBr 21092021 11
[O3]0/molecule cm-3	371000000000000	[O3]0/molecule cm-3	181000000000000	[O3]0/molecule cm-3	188000000000000	[O3]0/molecule cm-3	422000000000000	[O3]0/molecule cm-3	207000000000000	[O3]0/molecule cm-3	111000000000000	[O3]0/molecule cm-3	321000000000000	[O3]0/molecule cm-3	44000000000000	[O3]0/molecule cm-3	157000000000000	[O3]0/molecule cm-3	35870000000000	[O3]0/molecule cm-3	0
pf	0.41	pf	0.41	pf	0.41	pf	0.41	pf	0.41	pf	0.41	pf	0.41	pf	0.41	pf	0.41	pf	0.41	pf	0
t/us	HgBr LIF Signal	t/us	HgBr LIF Signal	t/us	HgBr LIF Signal	t/us	HgBr LIF Signal	t/us	HgBr LIF Signal	t/us	HgBr LIF Signal	t/us	HgBr LIF Signal	t/us	HgBr LIF Signal	t/us	HgBr LIF Signal	t/us	HgBr LIF Signal	t/us	HgBr LIF Signal
-50	0.000222	-80	0.000428333	-80	0.000378778	-60	0.000190556	-120	0.000157667	-200	0.0002	-80	9.32222e-05	-400	0.000301556	-160	0.000284444	-800	0.000224222	-3000	0.00239
-45	0	-72	-2.56667e-05	-72	4.77778e-06	-54	2.55556e-05	-108	-2.23333e-05	-180	-4.3e-05	-72	2.52222e-05	-360	5.55556e-07	-144	1.94444e-05	-720	-1.77778e-05	-2700	-0.000107333
-40	-3.2e-05	-64	-1.16667e-05	-64	8.77778e-06	-48	5.55556e-07	-96	-4.93333e-05	-160	-2.2e-05	-64	-4.07778e-05	-320	-1.84444e-05	-128	1.94444e-05	-640	9.22222e-06	-2400	5.76667e-05
-35	-1.2e-05	-56	1.43333e-05	-56	-2.32222e-05	-42	-3.04444e-05	-84	8.66667e-06	-140	-1.3e-05	-56	3.32222e-05	-280	2.55556e-06	-112	-2.55556e-06	-560	3.52222e-05	-2100	-1.13333e-05
-30	-8e-06	-48	7.03333e-05	-48	3.77778e-05	-36	4.55556e-06	-72	-5.33333e-06	-120	4e-06	-48	-8.77778e-06	-240	2.05556e-05	-96	5.64444e-05	-480	-2.87778e-05	-1800	-9.33333e-05
-25	2.6e-05	-40	-1.86667e-05	-40	-1.22222e-06	-30	2.65556e-05	-60	1.76667e-05	-100	1.7e-05	-40	-2.77778e-05	-200	9.55556e-06	-80	-5.55556e-06	-400	-5.77778e-06	-1500	-4.33333e-06
-20	8e-06	-32	-2.06667e-05	-32	-3.72222e-05	-24	-1.44444e-06	-48	5.16667e-05	-80	1.1e-05	-32	-1.77778e-06	-160	-3.64444e-05	-64	-8.55556e-06	-320	3.32222e-05	-1200	1.06667e-05
-15	-4e-06	-24	-1.56667e-05	-24	1.87778e-05	-18	-6.44444e-06	-36	-2.73333e-05	-60	2.8e-05	-24	-1.57778e-05	-120	-3.54444e-05	-48	-1.35556e-05	-240	-5.77778e-06	-900	3.06667e-05
-10	1.1e-05	-16	1.53333e-05	-16	-1.22222e-06	-12	-2.74444e-05	-24	8.66667e-06	-40	2.7e-05	-16	-1.57778e-05	-80	-7.44444e-06	-32	-5.55556e-05	-160	-3.47778e-05	-600	6.36667e-05
-5	1.1e-05	-8	-7.66667e-06	-8	-7.22222e-06	-6	8.55556e-06	-12	1.76667e-05	-20	-9e-06	-8	5.22222e-05	-40	6.45556e-05	-16	-9.55556e-06	-80	1.52222e-05	-300	5.36667e-05
0	1e-06	0	2.13333e-05	0	-2.22222e-07	0	5.55556e-06	0	1.46667e-05	0	2.9e-05	0	-2.87778e-05	0	-2.74444e-05	0	-1.95556e-05	0	-1.07778e-05	0	8.66667e-06
1.672	0.00793	2.676	0.01166	2.676	0.01211	2.007	0.00903	4.013	0.01259	6.689	0.01577	2.676	0.01063	13.378	0.01661	5.351	0.01437	26.756	0.0218	100.334	0.03569
3.344	0.01485	5.351	0.01823	5.351	0.01667	4.013	0.01443	8.027	0.01656	13.378	0.02102	5.351	0.01628	26.756	0.02492	10.702	0.02071	53.512	0.03107	200.669	0.05126
5.017	0.01557	8.027	0.01777	8.027	0.01662	6.02	0.01408	12.04	0.017	20.067	0.02034	8.027	0.01591	40.134	0.02339	16.054	0.02015	80.268	0.02929	301.003	0.05224
6.689	0.01512	10.702	0.01696	10.702	0.0165	8.027	0.01405	16.054	0.01537	26.756	0.019	10.702	0.01551	53.512	0.02206	21.405	0.02	107.023	0.02704	401.338	0.05031
8.361	0.01303	13.378	0.0155	13.378	0.01501	10.033	0.01423	20.067	0.0145	33.445	0.01818	13.378	0.01386	66.89	0.02181	26.756	0.0177	133.779	0.02616	501.672	0.04856
10.033	0.01355	16.054	0.01403	16.054	0.01607	12.04	0.01253	24.08	0.01427	40.134	0.01788	16.054	0.01289	80.268	0.02217	32.107	0.01752	160.535	0.02486	602.007	0.05018
11.706	0.01341	18.729	0.01533	18.729	0.01533	14.047	0.01146	28.094	0.01348	46.823	0.01736	18.729	0.01271	93.645	0.02065	37.458	0.01721	187.291	0.0263	702.341	0.04401
13.378	0.01281	21.405	0.01473	21.405	0.01467	16.054	0.01151	32.107	0.01182	53.512	0.01678	21.405	0.01234	107.023	0.01865	42.809	0.01565	214.047	0.02284	802.676	0.04734
15.05	0.0127	24.08	0.01392	24.08	0.01401	18.06	0.01104	36.12	0.01288	60.201	0.01534	24.08	0.01194	120.401	0.01994	48.161	0.01545	240.803	0.02285	903.01	0.04689
16.722	0.012	26.756	0.01414	26.756	0.0127	20.067	0.01114	40.134	0.01235	66.89	0.01487	26.756	0.01019	133.779	0.01862	53.512	0.01474	267.559	0.02206	1003.34	0.04443
18.395	0.01195	29.431	0.01396	29.431	0.01326	22.074	0.00982	44.147	0.01201	73.579	0.01521	29.431	0.0108	147.157	0.01894	58.863	0.01363	294.314	0.02143	1103.68	0.04725
20.067	0.0116	32.107	0.01347	32.107	0.01283	24.08	0.01004	48.161	0.01118	80.268	0.01415	32.107	0.0104	160.535	0.01816	64.214	0.01326	321.07	0.02025	1204.01	0.04646
21.739	0.01084	34.783	0.0135	34.783	0.01142	26.087	0.00948	52.174	0.01064	86.957	0.01337	34.783	0.01037	173.913	0.01643	69.565	0.01307	347.826	0.02024	1304.35	0.04543
23.411	0.00987	37.458	0.0124	37.458	0.01205	28.094	0.00909	56.187	0.01013	93.645	0.01278	37.458	0.00921	187.291	0.01714	74.916	0.01288	374.582	0.01964	1404.68	0.04366
25.084	0.0097	40.134	0.01189	40.134	0.01184	30.1	0.00822	60.201	0.01032	100.334	0.0131	40.134	0.00877	200.669	0.01596	80.268	0.01271	401.338	0.0193	1505.02	0.04345
26.756	0.00906	42.809	0.01205	42.809	0.01145	32.107	0.00869	64.214	0.0093	107.023	0.0131	42.809	0.0088	214.047	0.01581	85.619	0.01218	428.094	0.0188	1605.35	0.04416
28.428	0.00966	45.485	0.01203	45.485	0.01127	34.114	0.00825	68.227	0.00988	113.712	0.01228	45.485	0.00889	227.425	0.01539	90.97	0.01143	454.849	0.01745	1705.69	0.04372
30.1	0.00927	48.161	0.01115	48.161	0.01123	36.12	0.00809	72.241	0.00918	120.401	0.01148	48.161	0.00775	240.803	0.01564	96.321	0.01166	481.605	0.01718	1806.02	0.04255
31.773	0.00893	50.836	0.01188	50.836	0.0113	38.127	0.008	76.254	0.00873	127.09	0.01089	50.836	0.00797	254.181	0.01438	101.672	0.01123	508.361	0.01629	1906.35	0.04155
33.445	0.00919	53.512	0.01071	53.512	0.00982	40.134	0.00825	80.268	0.00899	133.779	0.01097	53.512	0.00737	267.559	0.01517	107.023	0.01138	535.117	0.01701	2006.69	0.0398
35.117	0.00873	56.187	0.01083	56.187	0.00925	42.14	0.00726	84.281	0.00842	140.468	0.01052	56.187	0.00776	280.936	0.01297	112.375	0.00967	561.873	0.01645	2107.02	0.04094
36.789	0.00817	58.863	0.01	58.863	0.00917	44.147	0.0074	88.294	0.00853	147.157	0.0103	58.863	0.00733	294.314	0.01408	117.726	0.00956	588.629	0.01618	2207.36	0.04049
38.462	0.00843	61.538	0.01029	61.538	0.00928	46.154	0.00722	92.308	0.00788	153.846	0.01009	61.538	0.00657	307.692	0.01306	123.077	0.01046	615.385	0.01437	2307.69	0.03887
40.134	0.00817	64.214	0.01009	64.214	0.00904	48.161	0.00697	96.321	0.00803	160.535	0.00976	64.214	0.00729	321.07	0.01319	128.428	0.00917	642.14	0.01562	2408.03	0.03901
41.806	0.00809	66.89	0.01018	66.89	0.00939	50.167	0.00685	100.334	0.00725	167.224	0.00964	66.89	0.00671	334.448	0.01309	133.779	0.00887	668.896	0.01505	2508.36	0.0401
43.478	0.0078	69.565	0.00989	69.565	0.00855	52.174	0.00688	104.348	0.00711	173.913	0.00953	69.565	0.00662	347.826	0.01154	139.13	0.00906	695.652	0.01456	2608.7	0.03943
45.151	0.00775	72.241	0.00903	72.241	0.00828	54.181	0.0065	108.361	0.00753	180.602	0.00881	72.241	0.0065	361.204	0.01232	144.482	0.00887	722.408	0.01304	2709.03	0.03917
46.823	0.0076	74.916	0.0099	74.916	0.00777	56.187	0.00635	112.375	0.00704	187.291	0.00878	74.916	0.0062	374.582	0.01158	149.833	0.00916	749.164	0.01393	2809.36	0.03838
48.495	0.00793	77.592	0.00899	77.592	0.00817	58.194	0.00651	116.388	0.00704	193.98	0.00819	77.592	0.0063	387.96	0.01135	155.184	0.00877	775.92	0.01375	2909.7	0.0386
50.167	0.00705	80.268	0.00879	80.268	0.00844	60.201	0.00583	120.401	0.00731	200.669	0.00846	80.268	0.00605	401.338	0.01178	160.535	0.00865	802.676	0.01301	3010.03	0.03802
51.839	0.00683	82.943	0.00861	82.943	0.00772	62.207	0.00594	124.415	0.00673	207.358	0.00852	82.943	0.00593	414.716	0.0112	165.886	0.0081	829.431	0.01249	3110.37	0.03727
53.512	0.00709	85.619	0.00836	85.619	0.00813	64.214	0.00609	128.428	0.00625	214.047	0.00805	85.619	0.00599	428.094	0.01028	171.237	0.00759	856.187	0.01288	3210.7	0.03581
55.184	0.00671	88.294	0.00882	88.294	0.00769	66.221	0.00513	132.441	0.00593	220.736	0.00813	88.294	0.0061	441.472	0.01114	176.589	0.00852	882.943	0.01191	3311.04	0.03792
56.856	0.00639	90.97	0.00817	90.97	0.00782	68.227	0.00506	136.455	0.00636	227.425	0.00805	90.97	0.00528	454.849	0.01112	181.94	0.00769	909.699	0.01198	3411.37	0.037
58.528	0.00593	93.645	0.00835	93.645	0.008	70.234	0.00524	140.468	0.00592	234.114	0.00744	93.645	0.00573	468.227	0.01021	187.291	0.00797	936.455	0.0116	3511.71	0.03459
60.201	0.00629	96.321	0.00805	96.321	0.0078	72.241	0.00538	144.482	0.00639	240.803	0.00749	96.321	0.00546	481.605	0.01028	192.642	0.00728	963.211	0.01071	3612.04	0.03419
61.873	0.00643	98.997	0.00684	98.997	0.00705	74.247	0.00557	148.495	0.00606	247.492	0.0072	98.997	0.00544	494.983	0.00979	197.993	0.00758	989.967	0.01028	3712.38	0.03517
63.545	0.00614	101.672	0.00788	101.672	0.00662	76.254	0.00503	152.508	0.00558	254.181	0.00733	101.672	0.00531	508.361	0.00933	203.344	0.00695	1016.72	0.00942	3812.71	0.03353
65.217	0.00623	104.348	0.00752	104.348	0.00677	78.261	0.00483	156.522	0.00597	260.87	0.00704	104.348	0.00519	521.739	0.00954	208.696	0.00726	1043.48	0.01041	3913.04	0.03415
66.89	0.0062	107.023	0.00744	107.023	0.00636	80.268	0.00504	160.535	0.00536	267.559	0.00706	107.023	0.00532	535.117	0.00898	214.047	0.007	1070.23	0.00973	4013.38	0.03158
68.562	0.00612	109.699	0.00777	109.699	0.00745	82.274	0.00483	164.548	0.00559	274.247	0.00701	109.699	0.00504	548.495	0.01007	219.398	0.00739	1096.99	0.00908	4113.71	0.03349
70.234	0.00578	112.375	0.00746	112.375	0.00728	84.281	0.00492	168.562	0.0057	280.936	0.00677	112.375	0.00485	561.873	0.00911	224.749	0.00649	1123.75	0.00972	4214.05	0.03308
71.906	0.00536	115.05	0.00757	115.05	0.00675	86.288	0.00478	172.575	0.00595	287.625	0.00693	115.05	0.00499	575.251	0.00893	230.1	0.0067	1150.5	0.00841	4314.38	0.03491
73.579	0.00522	117.726	0.0072	117.726	0.00619	88.294	0.00484	176.589	0.00514	294.314	0.00636	117.726	0.00491	588.629	0.00881	235.452	0.00683	1177.26	0.00905	4414.72	0.03175
75.251	0.00538	120.401	0.00675	120.401	0.00636	90.301	0.0044	180.602	0.00538	301.003	0.00673	120.401	0.0052	602.007	0.00843	240.803	0.00626	1204.01	0.0087	4515.05	0.03237
76.923	0.00582	123.077	0.00692	123.077	0.00662	92.308	0.00463	184.615	0.00522	307.692	0.00674	123.077	0.00482	615.385	0.00895	246.154	0.00617	1230.77	0.00906	4615.38	0.03253
78.595	0.00503	125.753	0.00687	125.753	0.00607	94.314	0.00458	188.629	0.0052	314.381	0.00644	125.753	0.00504	628.763	0.00848	251.505	0.00609	1257.53	0.00862	4715.72	0.03193
80.268	0.00536	128.428	0.00691	128.428	0.00599	96.321	0.00452	192.642	0.00561	321.07	0.00569	128.428	0.00491	642.14	0.0082	256.856	0.00646	1284.28	0.00923	4816.05	0.03137
81.94	0.00523	131.104	0.00676	131.104	0.0062	98.328	0.00452	196.656	0.00562	327.759	0.0067	131.104	0.00487	655.518	0.0088	262.207	0.00641	1311.04	0.00814	4916.39	0.03328
83.612	0.00529	133.779	0.00622	133.779	0.00619	100.334	0.0042	200.669	0.00521	334.448	0.00596	133.779	0.00459	668.896	0.00771	267.559	0.00616	1337.79	0.00806	5016.72	0.03171
85.284	0.0052	136.455	0.00679	136.455	0.00603	102.341	0.00481	204.682	0.005	341.137	0.00553	136.455	0.00461	682.274	0.00827	272.91	0.00604	1364.55	0.00807	5117.06	0.03163
86.957	0.00516	139.13	0.00634	139.13	0.00563	104.348	0.00447	208.696	0.00451	347.826	0.00613	139.13	0.00442	695.652	0.00744	278.261	0.00594	1391.3	0.00809	5217.39	0.03062
88.629	0.0051	141.806	0.00632	141.806	0.00574	106.355	0.00384	212.709	0.00494	354.515	0.00602	141.806	0.00456	709.03	0.00746	283.612	0.00546	1418.06	0.00734	5317.73	0.03022
90.301	0.00505	144.482	0.00658	144.482	0.0057	108.361	0.00405	216.722	0.00499	361.204	0.00578	144.482	0.00442	722.408	0.00737	288.963	0.00548	1444.82	0.00749	5418.06	0.03145
91.973	0.00521	147.157	0.00592	147.157	0.00555	110.368	0.00437	220.736	0.00466	367.893	0.00544	147.157	0.00419	735.786	0.00735	294.314	0.00569	1471.57	0.00776	5518.4	0.03169
93.645	0.00469	149.833	0.00626	149.833	0.00572	112.375	0.00436	224.749	0.00476	374.582	0.0058	149.833	0.00455	749.164	0.00739	299.666	0.00589	1498.33	0.00695	5618.73	0.02895
95.318	0.00478	152.508	0.00609	152.508	0.0055	114.381	0.00432	228.763	0.00473	381.271	0.00581	152.508	0.00431	762.542	0.00677	305.017	0.00581	1525.08	0.0073	5719.06	0.02906
96.99	0.00473	155.184	0.00581	155.184	0.00532	116.388	0.00403	232.776	0.00464	387.96	0.0054	155.184	0.00432	775.92	0.00736	310.368	0.00565	1551.84	0.00738	5819.4	0.0288
98.662	0.00508	157.86	0.00581	157.86	0.00605	118.395	0.00405	236.789	0.00472	394.649	0.00537	157.86	0.00428	789.298	0.00711	315.719	0.00567	1578.59	0.00673	5919.73	0.02818
100.334	0.00475	160.535	0.00571	160.535	0.00568	120.401	0.00387	240.803	0.00441	401.338	0.00564	160.535	0.00378	802.676	0.00716	321.07	0.00512	1605.35	0.00701	6020.07	0.02816
102.007	0.00489	163.211	0.00616	163.211	0.0057	122.408	0.00407	244.816	0.00441	408.027	0.00562	163.211	0.00413	816.054	0.0068	326.421	0.00572	1632.11	0.00656	6120.4	0.02872
103.679	0.00395	165.886	0.00571	165.886	0.00554	124.415	0.00352	248.829	0.00454	414.716	0.00618	165.886	0.00462	829.431	0.00685	331.773	0.00551	1658.86	0.00633	6220.74	0.0301
105.351	0.00468	168.562	0.00563	168.562	0.0053	126.421	0.0039	252.843	0.00448	421.405	0.00532	168.562	0.00439	842.809	0.00631	337.124	0.00528	1685.62	0.00672	6321.07	0.0288
107.023	0.00402	171.237	0.00552	171.237	0.00534	128.428	0.00414	256.856	0.00413	428.094	0.00515	171.237	0.00402	856.187	0.00692	342.475	0.00559	1712.38	0.00657	6421.4	0.028
108.696	0.00457	173.913	0.00591	173.913	0.00513	130.435	0.00395	260.87	0.00482	434.783	0.00517	173.913	0.00378	869.565	0.00664	347.826	0.00521	1739.13	0.00621	6521.74	0.02706
110.368	0.00469	176.589	0.00579	176.589	0.00545	132.441	0.00412	264.883	0.00456	441.472	0.00531	176.589	0.0038	882.943	0.00624	353.177	0.00527	1765.89	0.00626	6622.07	0.02897
112.04	0.00493	179.264	0.00555	179.264	0.00558	134.448	0.00391	268.896	0.00406	448.161	0.00523	179.264	0.00372	896.321	0.00665	358.528	0.00526	1792.64	0.0064	6722.41	0.02803
113.712	0.00429	181.94	0.00513	181.94	0.00502	136.455	0.00369	272.91	0.00431	454.849	0.00541	181.94	0.00363	909.699	0.00653	363.88	0.00525	1819.4	0.00624	6822.74	0.02652
115.385	0.00449	184.615	0.00572	184.615	0.00516	138.462	0.00383	276.923	0.00443	461.538	0.00473	184.615	0.00384	923.077	0.00676	369.231	0.00497	1846.15	0.00616	6923.08	0.02856
117.057	0.00407	187.291	0.0058	187.291	0.00503	140.468	0.00368	280.936	0.00395	468.227	0.00508	187.291	0.00348	936.455	0.00676	374.582	0.00507	1872.91	0.00608	7023.41	0.02705
118.729	0.00452	189.967	0.00524	189.967	0.00463	142.475	0.00363	284.95	0.00393	474.916	0.00516	189.967	0.00375	949.833	0.00606	379.933	0.00496	1899.67	0.00609	7123.75	0.02645
120.401	0.0044	192.642	0.00531	192.642	0.00519	144.482	0.0036	288.963	0.00427	481.605	0.00469	192.642	0.00373	963.211	0.00593	385.284	0.00519	1926.42	0.00562	7224.08	0.02673
122.074	0.004	195.318	0.0051	195.318	0.00487	146.488	0.00345	292.977	0.00411	488.294	0.00464	195.318	0.00386	976.589	0.00564	390.635	0.00481	1953.18	0.00579	7324.42	0.02755
123.746	0.0044	197.993	0.00506	197.993	0.00471	148.495	0.00338	296.99	0.0041	494.983	0.00478	197.993	0.00363	989.967	0.00577	395.987	0.00507	1979.93	0.00589	7424.75	0.02597
125.418	0.00379	200.669	0.00559	200.669	0.00485	150.502	0.0036	301.003	0.0039	501.672	0.00494	200.669	0.00353	1003.34	0.00585	401.338	0.0048	2006.69	0.00522	7525.08	0.02739
127.09	0.00371	203.344	0.00524	203.344	0.00488	152.508	0.0036	305.017	0.00415	508.361	0.0051	203.344	0.00343	1016.72	0.00598	406.689	0.00466	2033.44	0.00586	7625.42	0.0255
128.763	0.00409	206.02	0.00529	206.02	0.00477	154.515	0.00347	309.03	0.00375	515.05	0.00494	206.02	0.00373	1030.1	0.0055	412.04	0.0043	2060.2	0.00548	7725.75	0.02379
130.435	0.00422	208.696	0.0048	208.696	0.00492	156.522	0.00361	313.043	0.00395	521.739	0.00454	208.696	0.00324	1043.48	0.00496	417.391	0.00419	2086.96	0.00497	7826.09	0.02402
132.107	0.00403	211.371	0.00507	211.371	0.00454	158.528	0.00346	317.057	0.00384	528.428	0.00486	211.371	0.00374	1056.86	0.00544	422.742	0.00439	2113.71	0.00516	7926.42	0.02318
133.779	0.00423	214.047	0.00502	214.047	0.00481	160.535	0.00327	321.07	0.00384	535.117	0.00495	214.047	0.00318	1070.23	0.00601	428.094	0.00454	2140.47	0.0053	8026.76	0.02472
135.452	0.00371	216.722	0.0049	216.722	0.00457	162.542	0.00341	325.084	0.00397	541.806	0.00449	216.722	0.00322	1083.61	0.00523	433.445	0.00488	2167.22	0.0049	8127.09	0.02382
137.124	0.00418	219.398	0.00481	219.398	0.0047	164.548	0.00344	329.097	0.00394	548.495	0.00471	219.398	0.00349	1096.99	0.00529	438.796	0.00453	2193.98	0.00502	8227.42	0.02312
138.796	0.00372	222.074	0.00463	222.074	0.00477	166.555	0.00334	333.11	0.00378	555.184	0.00451	222.074	0.0033	1110.37	0.00586	444.147	0.00415	2220.74	0.00565	8327.76	0.02445
140.468	0.00358	224.749	0.00478	224.749	0.00461	168.562	0.00372	337.124	0.00387	561.873	0.00436	224.749	0.00347	1123.75	0.00495	449.498	0.00431	2247.49	0.00495	8428.09	0.02347
142.14	0.00383	227.425	0.00534	227.425	0.00467	170.569	0.00308	341.137	0.00371	568.562	0.00444	227.425	0.00337	1137.12	0.00475	454.849	0.00446	2274.25	0.00502	8528.43	0.02387
143.813	0.0041	230.1	0.00483	230.1	0.004	172.575	0.00314	345.151	0.00357	575.251	0.00479	230.1	0.00337	1150.5	0.00522	460.201	0.00461	2301	0.00472	8628.76	0.02427
145.485	0.00379	232.776	0.00448	232.776	0.00462	174.582	0.00345	349.164	0.00381	581.94	0.00458	232.776	0.00391	1163.88	0.0052	465.552	0.00406	2327.76	0.00483	8729.1	0.02261
147.157	0.00388	235.452	0.00453	235.452	0.00451	176.589	0.00325	353.177	0.00362	588.629	0.00401	235.452	0.00327	1177.26	0.00508	470.903	0.00436	2354.51	0.0046	8829.43	0.0239
148.829	0.00376	238.127	0.00476	238.127	0.00444	178.595	0.00335	357.191	0.00346	595.318	0.00423	238.127	0.00316	1190.64	0.00535	476.254	0.00465	2381.27	0.00474	8929.77	0.0228
150.502	0.00373	240.803	0.00488	240.803	0.00437	180.602	0.00301	361.204	0.00334	602.007	0.00412	240.803	0.00324	1204.01	0.00512	481.605	0.00401	2408.03	0.00426	9030.1	0.02448
152.174	0.00361	243.478	0.00463	243.478	0.00413	182.609	0.00314	365.217	0.00357	608.696	0.00408	243.478	0.00316	1217.39	0.00488	486.957	0.00405	2434.78	0.00439	9130.43	0.02342
153.846	0.00359	246.154	0.00466	246.154	0.00424	184.615	0.00263	369.231	0.00347	615.385	0.00408	246.154	0.00293	1230.77	0.00525	492.308	0.00417	2461.54	0.00445	9230.77	0.02267
155.518	0.0036	248.829	0.0044	248.829	0.00416	186.622	0.00314	373.244	0.00315	622.074	0.00408	248.829	0.00298	1244.15	0.00521	497.659	0.00415	2488.29	0.0042	9331.1	0.02298
157.191	0.00374	251.505	0.00438	251.505	0.00418	188.629	0.00321	377.258	0.0033	628.763	0.00402	251.505	0.00288	1257.53	0.00495	503.01	0.0042	2515.05	0.00394	9431.44	0.02244
158.863	0.00371	254.181	0.00461	254.181	0.00415	190.635	0.00307	381.271	0.00378	635.452	0.00416	254.181	0.00308	1270.9	0.00431	508.361	0.00398	2541.81	0.00436	9531.77	0.02141
160.535	0.00366	256.856	0.00447	256.856	0.0045	192.642	0.00286	385.284	0.00347	642.14	0.00399	256.856	0.00308	1284.28	0.00487	513.712	0.00438	2568.56	0.00433	9632.11	0.02213
162.207	0.00371	259.532	0.00467	259.532	0.00408	194.649	0.00316	389.298	0.00318	648.829	0.00431	259.532	0.00289	1297.66	0.0047	519.064	0.00386	2595.32	0.00408	9732.44	0.02234
163.88	0.00316	262.207	0.00458	262.207	0.00379	196.656	0.00287	393.311	0.00335	655.518	0.00435	262.207	0.0031	1311.04	0.00449	524.415	0.00408	2622.07	0.00378	9832.78	0.02234
165.552	0.00332	264.883	0.00451	264.883	0.00411	198.662	0.00287	397.324	0.00345	662.207	0.00389	264.883	0.00282	1324.42	0.00446	529.766	0.00407	2648.83	0.00424	9933.11	0.02179
167.224	0.00305	267.559	0.00427	267.559	0.00399	200.669	0.00303	401.338	0.00342	668.896	0.00377	267.559	0.00284	1337.79	0.00434	535.117	0.00387	2675.58	0.00401	10033.4	0.022
168.896	0.00361	270.234	0.00427	270.234	0.00432	202.676	0.00294	405.351	0.00287	675.585	0.00379	270.234	0.00296	1351.17	0.0046	540.468	0.00411	2702.34	0.00403	10133.8	0.02126
170.569	0.00354	272.91	0.00433	272.91	0.00404	204.682	0.00284	409.365	0.0032	682.274	0.00404	272.91	0.00304	1364.55	0.00453	545.819	0.00373	2729.1	0.00424	10234.1	0.02078
172.241	0.00369	275.585	0.004	275.585	0.00421	206.689	0.0027	413.378	0.00311	688.963	0.00379	275.585	0.00299	1377.93	0.00442	551.171	0.00409	2755.85	0.004	10334.4	0.0201
173.913	0.00353	278.261	0.00425	278.261	0.00399	208.696	0.0032	417.391	0.00302	695.652	0.00358	278.261	0.00253	1391.3	0.00456	556.522	0.00377	2782.61	0.00409	10434.8	0.02133
175.585	0.00356	280.936	0.00399	280.936	0.00422	210.702	0.00279	421.405	0.00325	702.341	0.00372	280.936	0.0029	1404.68	0.00437	561.873	0.00385	2809.36	0.00363	10535.1	0.0215
177.258	0.00356	283.612	0.00403	283.612	0.00406	212.709	0.00291	425.418	0.00305	709.03	0.00359	283.612	0.0028	1418.06	0.00434	567.224	0.00393	2836.12	0.00358	10635.5	0.0212
178.93	0.00343	286.288	0.0042	286.288	0.00404	214.716	0.00274	429.431	0.00287	715.719	0.00406	286.288	0.00285	1431.44	0.00429	572.575	0.00384	2862.88	0.00372	10735.8	0.02017
180.602	0.00355	288.963	0.00402	288.963	0.00396	216.722	0.00267	433.445	0.00318	722.408	0.00384	288.963	0.00262	1444.82	0.00441	577.926	0.00382	2889.63	0.00391	10836.1	0.01964
182.274	0.00347	291.639	0.00383	291.639	0.00377	218.729	0.00285	437.458	0.00288	729.097	0.00364	291.639	0.00275	1458.19	0.00451	583.278	0.00382	2916.39	0.00378	10936.5	0.01985
183.946	0.00332	294.314	0.00401	294.314	0.0039	220.736	0.00271	441.472	0.00333	735.786	0.00386	294.314	0.00262	1471.57	0.00441	588.629	0.00365	2943.14	0.00352	11036.8	0.01949
185.619	0.00322	296.99	0.00417	296.99	0.00413	222.742	0.00285	445.485	0.00316	742.475	0.00355	296.99	0.00268	1484.95	0.00435	593.98	0.00361	2969.9	0.00352	11137.1	0.01992
187.291	0.0032	299.666	0.00418	299.666	0.00359	224.749	0.00271	449.498	0.0032	749.164	0.00343	299.666	0.00287	1498.33	0.00434	599.331	0.00357	2996.66	0.00349	11237.5	0.01969
188.963	0.00302	302.341	0.00404	302.341	0.00374	226.756	0.00277	453.512	0.00289	755.853	0.00345	302.341	0.0026	1511.71	0.00441	604.682	0.00347	3023.41	0.00347	11337.8	0.01951
190.635	0.00336	305.017	0.00426	305.017	0.00376	228.763	0.00245	457.525	0.00308	762.542	0.00347	305.017	0.00267	1525.08	0.00402	610.033	0.00345	3050.17	0.00319	11438.1	0.01911
192.308	0.00314	307.692	0.00418	307.692	0.00371	230.769	0.00288	461.538	0.00333	769.231	0.00347	307.692	0.0029	1538.46	0.00363	615.385	0.00369	3076.92	0.00334	11538.5	0.01842
193.98	0.00318	310.368	0.0037	310.368	0.00358	232.776	0.00252	465.552	0.00269	775.92	0.00365	310.368	0.0024	1551.84	0.00387	620.736	0.00335	3103.68	0.00335	11638.8	0.01965
195.652	0.00314	313.043	0.00416	313.043	0.00339	234.783	0.00247	469.565	0.00282	782.609	0.00352	313.043	0.0027	1565.22	0.00368	626.087	0.00371	3130.44	0.003	11739.1	0.01933
197.324	0.00327	315.719	0.00392	315.719	0.00377	236.789	0.00247	473.579	0.00319	789.298	0.00333	315.719	0.00241	1578.59	0.00413	631.438	0.00329	3157.19	0.00309	11839.5	0.01867
198.997	0.00293	318.395	0.00387	318.395	0.00347	238.796	0.00247	477.592	0.00258	795.987	0.00346	318.395	0.00261	1591.97	0.00377	636.789	0.00357	3183.95	0.0031	11939.8	0.01895
200.669	0.00304	321.07	0.00418	321.07	0.00327	240.803	0.00272	481.605	0.00278	802.676	0.00344	321.07	0.00275	1605.35	0.00378	642.14	0.00338	3210.7	0.00314	12040.1	0.01838
202.341	0.00308	323.746	0.0036	323.746	0.00356	242.809	0.00263	485.619	0.00288	809.365	0.00379	323.746	0.0024	1618.73	0.00374	647.492	0.0033	3237.46	0.00318	12140.5	0.0185
204.013	0.00306	326.421	0.00371	326.421	0.00362	244.816	0.00241	489.632	0.00295	816.054	0.00335	326.421	0.00248	1632.11	0.00412	652.843	0.00344	3264.21	0.00336	12240.8	0.01769
205.686	0.00276	329.097	0.00368	329.097	0.0039	246.823	0.00239	493.645	0.00256	822.742	0.00334	329.097	0.00245	1645.48	0.00394	658.194	0.00328	3290.97	0.00323	12341.1	0.01755
207.358	0.00268	331.773	0.00362	331.773	0.00361	248.829	0.00253	497.659	0.00302	829.431	0.00337	331.773	0.00274	1658.86	0.00382	663.545	0.0035	3317.73	0.00322	12441.5	0.01803
209.03	0.00291	334.448	0.00364	334.448	0.00343	250.836	0.00237	501.672	0.00275	836.12	0.00331	334.448	0.00238	1672.24	0.00394	668.896	0.00343	3344.48	0.00307	12541.8	0.01859
210.702	0.00284	337.124	0.00379	337.124	0.00306	252.843	0.0028	505.686	0.00266	842.809	0.00319	337.124	0.0027	1685.62	0.0037	674.247	0.0035	3371.24	0.0028	12642.1	0.0172
212.375	0.00307	339.799	0.00336	339.799	0.00373	254.849	0.00249	509.699	0.00293	849.498	0.00287	339.799	0.00235	1699	0.00356	679.599	0.00336	3397.99	0.00301	12742.5	0.01757
214.047	0.00269	342.475	0.00338	342.475	0.00371	256.856	0.00223	513.712	0.00282	856.187	0.00318	342.475	0.00235	1712.38	0.00363	684.95	0.00339	3424.75	0.00309	12842.8	0.01738
215.719	0.00301	345.151	0.00352	345.151	0.00375	258.863	0.00239	517.726	0.00293	862.876	0.00342	345.151	0.00243	1725.75	0.0036	690.301	0.00341	3451.5	0.00309	12943.1	0.01831
217.391	0.00264	347.826	0.00371	347.826	0.00341	260.87	0.00212	521.739	0.00258	869.565	0.00284	347.826	0.00255	1739.13	0.00384	695.652	0.00305	3478.26	0.00313	13043.5	0.01658
219.064	0.00291	350.502	0.0035	350.502	0.00344	262.876	0.00237	525.753	0.00282	876.254	0.00297	350.502	0.0023	1752.51	0.0032	701.003	0.00298	3505.02	0.00281	13143.8	0.01687
220.736	0.00313	353.177	0.00354	353.177	0.00355	264.883	0.00235	529.766	0.00287	882.943	0.00287	353.177	0.00228	1765.89	0.0039	706.355	0.00309	3531.77	0.00302	13244.1	0.01644
222.408	0.00255	355.853	0.00347	355.853	0.00363	266.89	0.00235	533.779	0.00285	889.632	0.00333	355.853	0.0021	1779.26	0.00344	711.706	0.00295	3558.53	0.00301	13344.5	0.01626
224.08	0.00261	358.528	0.00394	358.528	0.00363	268.896	0.00214	537.793	0.00279	896.321	0.00339	358.528	0.00235	1792.64	0.00356	717.057	0.00324	3585.28	0.00318	13444.8	0.01616
225.753	0.00276	361.204	0.00353	361.204	0.00333	270.903	0.00224	541.806	0.00273	903.01	0.00277	361.204	0.00247	1806.02	0.00357	722.408	0.00331	3612.04	0.00313	13545.2	0.01557
227.425	0.00301	363.88	0.00321	363.88	0.00323	272.91	0.00235	545.819	0.00261	909.699	0.00305	363.88	0.00227	1819.4	0.00325	727.759	0.00296	3638.8	0.00284	13645.5	0.01639
229.097	0.0028	366.555	0.00349	366.555	0.00342	274.916	0.00228	549.833	0.00246	916.388	0.00292	366.555	0.00247	1832.78	0.00362	733.11	0.00319	3665.55	0.00301	13745.8	0.01659
230.769	0.00297	369.231	0.00349	369.231	0.00325	276.923	0.0023	553.846	0.00269	923.077	0.00337	369.231	0.00219	1846.15	0.0033	738.462	0.00294	3692.31	0.00266	13846.2	0.01681
232.441	0.00283	371.906	0.00359	371.906	0.00315	278.93	0.00252	557.86	0.00266	929.766	0.00298	371.906	0.00205	1859.53	0.00342	743.813	0.00298	3719.06	0.00286	13946.5	0.01584
234.114	0.00274	374.582	0.00318	374.582	0.00347	280.936	0.002	561.873	0.00258	936.455	0.00303	374.582	0.00217	1872.91	0.00327	749.164	0.00274	3745.82	0.00286	14046.8	0.01611
235.786	0.00276	377.258	0.00306	377.258	0.00325	282.943	0.00237	565.886	0.00256	943.144	0.00287	377.258	0.0024	1886.29	0.00324	754.515	0.00278	3772.57	0.00291	14147.2	0.01567
237.458	0.00262	379.933	0.00336	379.933	0.00329	284.95	0.00208	569.9	0.00224	949.833	0.00296	379.933	0.00216	1899.67	0.003	759.866	0.00287	3799.33	0.00276	14247.5	0.01595
239.13	0.00276	382.609	0.00336	382.609	0.00353	286.957	0.00221	573.913	0.00258	956.522	0.00273	382.609	0.00211	1913.04	0.0033	765.217	0.00307	3826.09	0.00237	14347.8	0.01539
240.803	0.00259	385.284	0.00306	385.284	0.00351	288.963	0.00208	577.926	0.00254	963.211	0.00307	385.284	0.00237	1926.42	0.00325	770.569	0.00289	3852.84	0.00237	14448.2	0.01556
242.475	0.00267	387.96	0.00321	387.96	0.00303	290.97	0.00199	581.94	0.00258	969.9	0.00269	387.96	0.00212	1939.8	0.00338	775.92	0.00294	3879.6	0.00259	14548.5	0.0153
244.147	0.00262	390.635	0.003	390.635	0.00312	292.977	0.00205	585.953	0.00253	976.589	0.00251	390.635	0.00204	1953.18	0.00288	781.271	0.00293	3906.35	0.0026	14648.8	0.01526
245.819	0.00279	393.311	0.00327	393.311	0.00349	294.983	0.00199	589.967	0.00246	983.278	0.00291	393.311	0.00209	1966.56	0.00296	786.622	0.00294	3933.11	0.00277	14749.2	0.01478
247.492	0.00244	395.987	0.00333	395.987	0.00297	296.99	0.002	593.98	0.00232	989.967	0.00291	395.987	0.00207	1979.93	0.00342	791.973	0.00279	3959.87	0.00257	14849.5	0.01461
249.164	0.00282	398.662	0.00319	398.662	0.0032	298.997	0.00201	597.993	0.00263	996.656	0.00264	398.662	0.00209	1993.31	0.00335	797.324	0.00283	3986.62	0.00279	14949.8	0.01521
250.836	0.00245	401.338	0.0035	401.338	0.00299	301.003	0.00178	602.007	0.00253	1003.34	0.00295	401.338	0.00193	2006.69	0.00314	802.676	0.00267	4013.38	0.00238	15050.2	0.01473
252.508	0.00249	404.013	0.00345	404.013	0.00324	303.01	0.00204	606.02	0.00227	1010.03	0.00274	404.013	0.00221	2020.07	0.00316	808.027	0.00281	4040.13	0.00268	15150.5	0.014
254.181	0.00261	406.689	0.00318	406.689	0.00309	305.017	0.00208	610.033	0.00232	1016.72	0.0026	406.689	0.00213	2033.44	0.00316	813.378	0.00282	4066.89	0.00248	15250.8	0.0155
255.853	0.00287	409.365	0.00293	409.365	0.00304	307.023	0.00216	614.047	0.0023	1023.41	0.00279	409.365	0.00198	2046.82	0.00318	818.729	0.00292	4093.65	0.00237	15351.2	0.01447
257.525	0.00253	412.04	0.00327	412.04	0.00323	309.03	0.00188	618.06	0.0022	1030.1	0.00271	412.04	0.00202	2060.2	0.00314	824.08	0.00262	4120.4	0.00219	15451.5	0.0142
259.197	0.00275	414.716	0.00321	414.716	0.00316	311.037	0.00203	622.074	0.00225	1036.79	0.00259	414.716	0.00182	2073.58	0.00323	829.431	0.00287	4147.16	0.00247	15551.8	0.01497
260.87	0.00255	417.391	0.00316	417.391	0.00309	313.043	0.00189	626.087	0.00204	1043.48	0.00295	417.391	0.00158	2086.96	0.00306	834.783	0.0027	4173.91	0.00237	15652.2	0.01416
262.542	0.00254	420.067	0.00346	420.067	0.00288	315.05	0.00207	630.1	0.00242	1050.17	0.00247	420.067	0.00206	2100.33	0.00273	840.134	0.00257	4200.67	0.00223	15752.5	0.01388
264.214	0.00224	422.742	0.00315	422.742	0.00314	317.057	0.00184	634.114	0.00238	1056.86	0.00271	422.742	0.00205	2113.71	0.00297	845.485	0.00277	4227.42	0.00233	15852.8	0.0133
265.886	0.00229	425.418	0.00305	425.418	0.003	319.064	0.00207	638.127	0.00221	1063.55	0.00254	425.418	0.00194	2127.09	0.00278	850.836	0.00268	4254.18	0.00228	15953.2	0.01348
267.559	0.00244	428.094	0.00344	428.094	0.00298	321.07	0.00185	642.14	0.00201	1070.23	0.00284	428.094	0.00205	2140.47	0.00275	856.187	0.00276	4280.94	0.0021	16053.5	0.01372
269.231	0.00229	430.769	0.00285	430.769	0.00298	323.077	0.00191	646.154	0.00224	1076.92	0.00233	430.769	0.00179	2153.85	0.00288	861.538	0.00267	4307.69	0.00205	16153.8	0.01322
270.903	0.00254	433.445	0.00284	433.445	0.00297	325.084	0.0018	650.167	0.00184	1083.61	0.00271	433.445	0.00188	2167.22	0.00293	866.89	0.00267	4334.45	0.00222	16254.2	0.01319
272.575	0.0025	436.12	0.0031	436.12	0.00298	327.09	0.00195	654.181	0.00235	1090.3	0.00252	436.12	0.00179	2180.6	0.00301	872.241	0.00268	4361.2	0.00222	16354.5	0.01318
274.247	0.00241	438.796	0.00311	438.796	0.00315	329.097	0.002	658.194	0.0021	1096.99	0.00238	438.796	0.00181	2193.98	0.00311	877.592	0.00278	4387.96	0.00227	16454.8	0.01315
275.92	0.00249	441.472	0.00292	441.472	0.00313	331.104	0.00201	662.207	0.00219	1103.68	0.00235	441.472	0.00197	2207.36	0.00304	882.943	0.00238	4414.72	0.00232	16555.2	0.01295
277.592	0.00233	444.147	0.00311	444.147	0.00308	333.11	0.0019	666.221	0.00214	1110.37	0.00264	444.147	0.00167	2220.74	0.0029	888.294	0.00274	4441.47	0.00234	16655.5	0.01171
279.264	0.00215	446.823	0.00293	446.823	0.00286	335.117	0.00184	670.234	0.00216	1117.06	0.0024	446.823	0.00191	2234.11	0.00277	893.645	0.00243	4468.23	0.00196	16755.9	0.01294
280.936	0.00227	449.498	0.00286	449.498	0.00284	337.124	0.00201	674.247	0.00223	1123.75	0.00227	449.498	0.00182	2247.49	0.00326	898.997	0.00242	4494.98	0.00221	16856.2	0.01315
282.609	0.0022	452.174	0.00284	452.174	0.00276	339.13	0.00198	678.261	0.00211	1130.44	0.00223	452.174	0.00184	2260.87	0.00259	904.348	0.00238	4521.74	0.00223	16956.5	0.01284
284.281	0.00251	454.849	0.00322	454.849	0.003	341.137	0.00184	682.274	0.00225	1137.12	0.00245	454.849	0.00191	2274.25	0.00299	909.699	0.00258	4548.5	0.00203	17056.9	0.01262
285.953	0.00256	457.525	0.00311	457.525	0.00269	343.144	0.00197	686.288	0.00205	1143.81	0.00246	457.525	0.00177	2287.62	0.00264	915.05	0.00237	4575.25	0.00223	17157.2	0.01269
287.625	0.00212	460.201	0.00276	460.201	0.00307	345.151	0.00173	690.301	0.00222	1150.5	0.00242	460.201	0.00174	2301	0.00275	920.401	0.00247	4602.01	0.0022	17257.5	0.01276
289.298	0.00232	462.876	0.0027	462.876	0.00286	347.157	0.00196	694.314	0.00213	1157.19	0.00229	462.876	0.00164	2314.38	0.00254	925.753	0.00246	4628.76	0.0021	17357.9	0.01242
290.97	0.00226	465.552	0.00283	465.552	0.00285	349.164	0.00179	698.328	0.00201	1163.88	0.00232	465.552	0.0017	2327.76	0.00275	931.104	0.00243	4655.52	0.00229	17458.2	0.01306
292.642	0.0023	468.227	0.00283	468.227	0.00293	351.171	0.00166	702.341	0.0019	1170.57	0.00232	468.227	0.00162	2341.14	0.00267	936.455	0.00236	4682.27	0.00226	17558.5	0.01241
294.314	0.00231	470.903	0.00307	470.903	0.00271	353.177	0.00173	706.355	0.00214	1177.26	0.00234	470.903	0.00183	2354.51	0.00301	941.806	0.00247	4709.03	0.00214	17658.9	0.01269
295.987	0.00213	473.579	0.00316	473.579	0.00275	355.184	0.00165	710.368	0.00203	1183.95	0.00226	473.579	0.00174	2367.89	0.0025	947.157	0.00227	4735.79	0.00206	17759.2	0.01197
297.659	0.00233	476.254	0.00273	476.254	0.00282	357.191	0.00172	714.381	0.00196	1190.64	0.00225	476.254	0.00175	2381.27	0.00266	952.508	0.00235	4762.54	0.00218	17859.5	0.01211
299.331	0.0021	478.93	0.00309	478.93	0.00296	359.197	0.00164	718.395	0.00221	1197.32	0.00239	478.93	0.00172	2394.65	0.00281	957.86	0.00223	4789.3	0.00193	17959.9	0.0123
301.003	0.00209	481.605	0.00289	481.605	0.00278	361.204	0.00162	722.408	0.00184	1204.01	0.00229	481.605	0.00162	2408.03	0.00257	963.211	0.00228	4816.05	0.00189	18060.2	0.01194
302.676	0.00222	484.281	0.00264	484.281	0.00286	363.211	0.00168	726.421	0.00207	1210.7	0.00259	484.281	0.00171	2421.41	0.00259	968.562	0.00224	4842.81	0.00201	18160.5	0.01151
304.348	0.00208	486.957	0.0028	486.957	0.00271	365.217	0.00158	730.435	0.00204	1217.39	0.00232	486.957	0.00178	2434.78	0.00268	973.913	0.00243	4869.56	0.002	18260.9	0.01228
306.02	0.00215	489.632	0.00271	489.632	0.00284	367.224	0.00172	734.448	0.00211	1224.08	0.00195	489.632	0.00155	2448.16	0.00262	979.264	0.00217	4896.32	0.00211	18361.2	0.01189
307.692	0.00241	492.308	0.00281	492.308	0.00267	369.231	0.00162	738.462	0.00197	1230.77	0.00234	492.308	0.00183	2461.54	0.0027	984.615	0.00206	4923.08	0.00164	18461.5	0.01136
309.365	0.00197	494.983	0.00268	494.983	0.00255	371.237	0.00144	742.475	0.00196	1237.46	0.00215	494.983	0.00156	2474.92	0.00239	989.967	0.00202	4949.83	0.00192	18561.9	0.0126
311.037	0.00221	497.659	0.00278	497.659	0.0029	373.244	0.00156	746.488	0.00172	1244.15	0.00233	497.659	0.00172	2488.29	0.00251	995.318	0.00231	4976.59	0.0019	18662.2	0.01141
312.709	0.00202	500.334	0.00279	500.334	0.00236	375.251	0.00166	750.502	0.00181	1250.84	0.00216	500.334	0.00171	2501.67	0.0025	1000.67	0.00225	5003.34	0.00186	18762.5	0.011
314.381	0.0021	503.01	0.00252	503.01	0.00258	377.258	0.00166	754.515	0.00193	1257.53	0.00213	503.01	0.0015	2515.05	0.00229	1006.02	0.00192	5030.1	0.00182	18862.9	0.01186
316.054	0.00206	505.686	0.00301	505.686	0.00246	379.264	0.00175	758.528	0.00195	1264.21	0.00193	505.686	0.00155	2528.43	0.00257	1011.37	0.00229	5056.86	0.00184	18963.2	0.01114
317.726	0.00206	508.361	0.00285	508.361	0.00258	381.271	0.0018	762.542	0.00185	1270.9	0.00218	508.361	0.00151	2541.81	0.00257	1016.72	0.00214	5083.61	0.00191	19063.5	0.01101
319.398	0.00215	511.037	0.00299	511.037	0.00275	383.278	0.00149	766.555	0.00186	1277.59	0.00218	511.037	0.00151	2555.18	0.00246	1022.07	0.00243	5110.37	0.0018	19163.9	0.01185
321.07	0.00204	513.712	0.00271	513.712	0.00258	385.284	0.00156	770.569	0.00162	1284.28	0.00207	513.712	0.00162	2568.56	0.00241	1027.43	0.00212	5137.12	0.00189	19264.2	0.01113
322.742	0.00203	516.388	0.00283	516.388	0.00269	387.291	0.0016	774.582	0.00188	1290.97	0.00204	516.388	0.00162	2581.94	0.00248	1032.78	0.00201	5163.88	0.00174	19364.5	0.01052
324.415	0.00189	519.064	0.00283	519.064	0.00254	389.298	0.00162	778.595	0.00175	1297.66	0.00197	519.064	0.00153	2595.32	0.00213	1038.13	0.00214	5190.63	0.00192	19464.9	0.01051
326.087	0.00201	521.739	0.00268	521.739	0.00257	391.304	0.00169	782.609	0.00166	1304.35	0.00199	521.739	0.00144	2608.7	0.00247	1043.48	0.00221	5217.39	0.00183	19565.2	0.0108
327.759	0.00197	524.415	0.00248	524.415	0.00237	393.311	0.00158	786.622	0.0016	1311.04	0.00196	524.415	0.00132	2622.07	0.00235	1048.83	0.00214	5244.15	0.00191	19665.6	0.0104
329.431	0.00231	527.09	0.00241	527.09	0.00261	395.318	0.00148	790.635	0.00196	1317.73	0.00199	527.09	0.00173	2635.45	0.00249	1054.18	0.00221	5270.9	0.00169	19765.9	0.01119
331.104	0.00187	529.766	0.0026	529.766	0.00243	397.324	0.00151	794.649	0.00174	1324.42	0.0021	529.766	0.00146	2648.83	0.00223	1059.53	0.00216	5297.66	0.00174	19866.2	0.01176
332.776	0.00209	532.441	0.00267	532.441	0.00251	399.331	0.00165	798.662	0.0019	1331.1	0.00197	532.441	0.00151	2662.21	0.00239	1064.88	0.00187	5324.42	0.0018	19966.6	0.01088
334.448	0.00205	535.117	0.00245	535.117	0.00248	401.338	0.00167	802.676	0.00172	1337.79	0.00217	535.117	0.00162	2675.58	0.00224	1070.23	0.00195	5351.17	0.00198	20066.9	0.01086
336.12	0.002	537.793	0.00263	537.793	0.00255	403.344	0.00153	806.689	0.00173	1344.48	0.00182	537.793	0.0014	2688.96	0.00219	1075.58	0.00213	5377.93	0.00191
337.793	0.00182	540.468	0.00241	540.468	0.00263	405.351	0.00163	810.702	0.00191	1351.17	0.00199	540.468	0.0015	2702.34	0.00231	1080.94	0.00206	5404.68	0.00179
339.465	0.00208	543.144	0.00244	543.144	0.00255	407.358	0.00158	814.716	0.0015	1357.86	0.00209	543.144	0.00157	2715.72	0.00239	1086.29	0.00192	5431.44	0.00169
341.137	0.00219	545.819	0.00241	545.819	0.00227	409.365	0.00168	818.729	0.00175	1364.55	0.00205	545.819	0.00144	2729.1	0.0023	1091.64	0.00199	5458.19	0.00182
342.809	0.0019	548.495	0.00262	548.495	0.00238	411.371	0.00158	822.742	0.0016	1371.24	0.0018	548.495	0.00151	2742.48	0.00242	1096.99	0.00188	5484.95	0.00165
344.482	0.00187	551.171	0.00259	551.171	0.00241	413.378	0.00137	826.756	0.00177	1377.93	0.00169	551.171	0.00126	2755.85	0.00227	1102.34	0.002	5511.71	0.00174
346.154	0.00199	553.846	0.00236	553.846	0.00234	415.385	0.00145	830.769	0.00149	1384.61	0.00179	553.846	0.00147	2769.23	0.00233	1107.69	0.00195	5538.46	0.00173
347.826	0.0019	556.522	0.00264	556.522	0.00263	417.391	0.00158	834.783	0.0017	1391.3	0.00196	556.522	0.00152	2782.61	0.0023	1113.04	0.0019	5565.22	0.00164
349.498	0.00186	559.197	0.00236	559.197	0.0025	419.398	0.00134	838.796	0.00175	1397.99	0.00175	559.197	0.00148	2795.99	0.00234	1118.4	0.00193	5591.97	0.00167
351.171	0.00189	561.873	0.00275	561.873	0.00248	421.405	0.00146	842.809	0.0018	1404.68	0.00181	561.873	0.0015	2809.36	0.00222	1123.75	0.00168	5618.73	0.00183
352.843	0.00176	564.548	0.00253	564.548	0.00237	423.411	0.00158	846.823	0.00171	1411.37	0.00199	564.548	0.00129	2822.74	0.00235	1129.1	0.0018	5645.48	0.00151
354.515	0.00186	567.224	0.00219	567.224	0.0023	425.418	0.0015	850.836	0.00166	1418.06	0.00177	567.224	0.00155	2836.12	0.00212	1134.45	0.00186	5672.24	0.00149
356.187	0.00199	569.9	0.00238	569.9	0.00232	427.425	0.0014	854.849	0.00159	1424.75	0.00172	569.9	0.00144	2849.5	0.00206	1139.8	0.00198	5699	0.00164
357.86	0.00183	572.575	0.00259	572.575	0.00248	429.431	0.0015	858.863	0.00165	1431.44	0.00199	572.575	0.00134	2862.88	0.00217	1145.15	0.0018	5725.75	0.00164
359.532	0.00189	575.251	0.00241	575.251	0.00218	431.438	0.00138	862.876	0.00154	1438.13	0.00197	575.251	0.0014	2876.25	0.00199	1150.5	0.00187	5752.51	0.00153
361.204	0.00186	577.926	0.00257	577.926	0.00223	433.445	0.00142	866.89	0.00136	1444.82	0.00204	577.926	0.00146	2889.63	0.00205	1155.85	0.00172	5779.26	0.00147
362.876	0.00182	580.602	0.00225	580.602	0.00213	435.452	0.00153	870.903	0.00161	1451.51	0.00191	580.602	0.00139	2903.01	0.00236	1161.2	0.00164	5806.02	0.00164
364.548	0.00175	583.278	0.00234	583.278	0.00227	437.458	0.00138	874.916	0.00148	1458.19	0.0017	583.278	0.0016	2916.39	0.00214	1166.56	0.00195	5832.78	0.00162
366.221	0.002	585.953	0.00243	585.953	0.00211	439.465	0.00149	878.93	0.00148	1464.88	0.00203	585.953	0.0013	2929.77	0.00218	1171.91	0.00186	5859.53	0.00138
367.893	0.00175	588.629	0.0024	588.629	0.00221	441.472	0.00145	882.943	0.00159	1471.57	0.00189	588.629	0.00129	2943.14	0.00195	1177.26	0.00177	5886.29	0.0016
369.565	0.00182	591.304	0.00245	591.304	0.00215	443.478	0.00138	886.957	0.00156	1478.26	0.00187	591.304	0.00134	2956.52	0.00223	1182.61	0.00182	5913.04	0.00151
371.237	0.00187	593.98	0.00213	593.98	0.0021	445.485	0.00144	890.97	0.00151	1484.95	0.00167	593.98	0.00131	2969.9	0.00189	1187.96	0.00169	5939.8	0.00144
372.91	0.0019	596.656	0.00227	596.656	0.00202	447.492	0.00135	894.983	0.00146	1491.64	0.00178	596.656	0.00127	2983.28	0.00202	1193.31	0.00165	5966.56	0.00156
374.582	0.00184	599.331	0.00234	599.331	0.00218	449.498	0.00144	898.997	0.0015	1498.33	0.00165	599.331	0.0012	2996.66	0.00224	1198.66	0.00186	5993.31	0.00152
376.254	0.00174	602.007	0.00209	602.007	0.00233	451.505	0.00137	903.01	0.00143	1505.02	0.00191	602.007	0.0014	3010.03	0.00232	1204.01	0.00171	6020.07	0.0014
377.926	0.00174	604.682	0.00233	604.682	0.00214	453.512	0.00136	907.023	0.00149	1511.71	0.00175	604.682	0.00139	3023.41	0.0021	1209.36	0.00175	6046.82	0.00155
379.599	0.00175	607.358	0.00212	607.358	0.00208	455.518	0.00137	911.037	0.00157	1518.4	0.00171	607.358	0.00138	3036.79	0.00208	1214.72	0.00176	6073.58	0.00138
381.271	0.00182	610.033	0.00224	610.033	0.00222	457.525	0.00148	915.05	0.00146	1525.08	0.0017	610.033	0.00136	3050.17	0.00216	1220.07	0.00158	6100.33	0.00145
382.943	0.00186	612.709	0.00204	612.709	0.00228	459.532	0.00126	919.064	0.0014	1531.77	0.00165	612.709	0.00119	3063.54	0.00174	1225.42	0.00171	6127.09	0.00132
384.615	0.00168	615.385	0.00218	615.385	0.00228	461.538	0.0013	923.077	0.00145	1538.46	0.00175	615.385	0.00133	3076.92	0.00203	1230.77	0.00175	6153.85	0.00139
386.288	0.00185	618.06	0.00219	618.06	0.00212	463.545	0.00121	927.09	0.00161	1545.15	0.00169	618.06	0.00121	3090.3	0.00212	1236.12	0.00189	6180.6	0.00143
387.96	0.0015	620.736	0.00206	620.736	0.00216	465.552	0.0013	931.104	0.00137	1551.84	0.00182	620.736	0.00125	3103.68	0.00203	1241.47	0.00166	6207.36	0.0014
389.632	0.00172	623.411	0.00216	623.411	0.00204	467.559	0.00122	935.117	0.00146	1558.53	0.00175	623.411	0.00114	3117.06	0.00164	1246.82	0.00155	6234.11	0.00121
391.304	0.00176	626.087	0.00212	626.087	0.0022	469.565	0.00128	939.13	0.00143	1565.22	0.00166	626.087	0.00107	3130.44	0.00202	1252.17	0.00182	6260.87	0.00136
392.977	0.00192	628.763	0.00212	628.763	0.00199	471.572	0.00134	943.144	0.00127	1571.91	0.00175	628.763	0.00127	3143.81	0.00169	1257.53	0.00182	6287.62	0.00134
394.649	0.00156	631.438	0.00226	631.438	0.00224	473.579	0.00135	947.157	0.00135	1578.59	0.00157	631.438	0.0012	3157.19	0.00189	1262.88	0.00157	6314.38	0.00136
396.321	0.00175	634.114	0.00196	634.114	0.00194	475.585	0.00119	951.171	0.00149	1585.28	0.00177	634.114	0.00127	3170.57	0.00193	1268.23	0.00157	6341.14	0.00131
397.993	0.00167	636.789	0.002	636.789	0.00203	477.592	0.00113	955.184	0.00119	1591.97	0.00169	636.789	0.00132	3183.95	0.00188	1273.58	0.00163	6367.89	0.00138
399.666	0.00166	639.465	0.00238	639.465	0.00213	479.599	0.00137	959.197	0.00138	1598.66	0.00148	639.465	0.00106	3197.32	0.00202	1278.93	0.00152	6394.65	0.00128
401.338	0.00149	642.14	0.00185	642.14	0.00221	481.605	0.00126	963.211	0.00144	1605.35	0.00166	642.14	0.00124	3210.7	0.00167	1284.28	0.0014	6421.4	0.00142
403.01	0.00164	644.816	0.00207	644.816	0.00196	483.612	0.00133	967.224	0.00138	1612.04	0.00167	644.816	0.00133	3224.08	0.00165	1289.63	0.00161	6448.16	0.00118
404.682	0.00156	647.492	0.00236	647.492	0.0022	485.619	0.00122	971.237	0.00142	1618.73	0.00163	647.492	0.00124	3237.46	0.00191	1294.98	0.00162	6474.92	0.00125
406.355	0.00156	650.167	0.00233	650.167	0.00209	487.625	0.00107	975.251	0.00143	1625.42	0.0017	650.167	0.00116	3250.84	0.00197	1300.33	0.00161	6501.67	0.00118
408.027	0.00153	652.843	0.0021	652.843	0.00188	489.632	0.00102	979.264	0.00137	1632.11	0.00166	652.843	0.00124	3264.21	0.00193	1305.69	0.00137	6528.43	0.00118
409.699	0.00163	655.518	0.00221	655.518	0.00184	491.639	0.00108	983.278	0.00126	1638.8	0.00155	655.518	0.00114	3277.59	0.00193	1311.04	0.00157	6555.18	0.00118
411.371	0.00148	658.194	0.00214	658.194	0.00198	493.645	0.00118	987.291	0.00128	1645.48	0.00174	658.194	0.00111	3290.97	0.00197	1316.39	0.00149	6581.94	0.00131
413.043	0.0017	660.87	0.00239	660.87	0.00193	495.652	0.00114	991.304	0.00134	1652.17	0.00151	660.87	0.00115	3304.35	0.00171	1321.74	0.00154	6608.7	0.00108
414.716	0.00157	663.545	0.00176	663.545	0.0019	497.659	0.00121	995.318	0.00132	1658.86	0.00153	663.545	0.00109	3317.73	0.00171	1327.09	0.00151	6635.45	0.00122
416.388	0.00147	666.221	0.00205	666.221	0.00195	499.666	0.00123	999.331	0.00132	1665.55	0.00156	666.221	0.00112	3331.1	0.00191	1332.44	0.0015	6662.21	0.00117
418.06	0.00148	668.896	0.00193	668.896	0.0019	501.672	0.0012	1003.34	0.00136	1672.24	0.00157	668.896	0.00123	3344.48	0.00159	1337.79	0.00157	6688.96	0.00116
419.732	0.00155	671.572	0.00221	671.572	0.00191	503.679	0.00137	1007.36	0.00123	1678.93	0.0015	671.572	0.0011	3357.86	0.0017	1343.14	0.00148	6715.72	0.00126
421.405	0.00154	674.247	0.00204	674.247	0.00181	505.686	0.00114	1011.37	0.00131	1685.62	0.0017	674.247	0.00114	3371.24	0.00187	1348.49	0.00137	6742.48	0.00115
423.077	0.00144	676.923	0.0021	676.923	0.00186	507.692	0.00119	1015.39	0.00119	1692.31	0.00166	676.923	0.00111	3384.61	0.00168	1353.85	0.00151	6769.23	0.00127
424.749	0.00181	679.599	0.00194	679.599	0.0018	509.699	0.00104	1019.4	0.00119	1699	0.00159	679.599	0.00122	3397.99	0.00162	1359.2	0.00152	6795.99	0.00116
426.421	0.00133	682.274	0.00215	682.274	0.00183	511.706	0.00126	1023.41	0.00126	1705.69	0.00158	682.274	0.00104	3411.37	0.00175	1364.55	0.00158	6822.74	0.00111
428.094	0.00148	684.95	0.00202	684.95	0.00191	513.712	0.00117	1027.43	0.00117	1712.38	0.00142	684.95	0.00109	3424.75	0.00169	1369.9	0.00145	6849.5	0.00113
429.766	0.0016	687.625	0.00215	687.625	0.00194	515.719	0.000996556	1031.44	0.00121	1719.06	0.00154	687.625	0.00112	3438.13	0.00209	1375.25	0.00155	6876.25	0.00113
431.438	0.0014	690.301	0.00187	690.301	0.00189	517.726	0.00113	1035.45	0.00121	1725.75	0.00152	690.301	0.00103	3451.5	0.00146	1380.6	0.00152	6903.01	0.00105
433.11	0.00148	692.977	0.00213	692.977	0.00177	519.732	0.00111	1039.46	0.00118	1732.44	0.00146	692.977	0.00106	3464.88	0.00179	1385.95	0.00149	6929.77	0.00113
434.783	0.00145	695.652	0.00211	695.652	0.00183	521.739	0.00115	1043.48	0.00125	1739.13	0.00141	695.652	0.00107	3478.26	0.00174	1391.3	0.00161	6956.52	0.00131
436.455	0.00154	698.328	0.00178	698.328	0.00202	523.746	0.00115	1047.49	0.00121	1745.82	0.00142	698.328	0.00102	3491.64	0.00141	1396.66	0.00128	6983.28	0.00117
438.127	0.00136	701.003	0.00201	701.003	0.00174	525.753	0.00102	1051.51	0.00116	1752.51	0.00132	701.003	0.000915222	3505.02	0.00158	1402.01	0.00157	7010.03	0.00125
439.799	0.00151	703.679	0.002	703.679	0.00211	527.759	0.00103	1055.52	0.00127	1759.2	0.00152	703.679	0.00112	3518.4	0.00178	1407.36	0.00149	7036.79	0.00102
441.472	0.00117	706.355	0.00201	706.355	0.00163	529.766	0.00103	1059.53	0.00113	1765.89	0.00148	706.355	0.000965222	3531.77	0.0016	1412.71	0.00127	7063.54	0.00115
443.144	0.00145	709.03	0.00194	709.03	0.00205	531.773	0.00128	1063.55	0.00122	1772.57	0.00146	709.03	0.000895222	3545.15	0.00161	1418.06	0.00145	7090.3	0.00122
444.816	0.00127	711.706	0.00208	711.706	0.00188	533.779	0.00104	1067.56	0.00118	1779.26	0.0014	711.706	0.00108	3558.53	0.00173	1423.41	0.00129	7117.06	0.00108
446.488	0.00136	714.381	0.002	714.381	0.00185	535.786	0.00109	1071.57	0.00114	1785.95	0.00122	714.381	0.000935222	3571.91	0.00156	1428.76	0.00138	7143.81	0.00105
448.161	0.0014	717.057	0.00207	717.057	0.00171	537.793	0.00113	1075.58	0.00121	1792.64	0.00151	717.057	0.00123	3585.28	0.00151	1434.11	0.00151	7170.57	0.00115
449.833	0.00138	719.732	0.00191	719.732	0.00185	539.799	0.000966556	1079.6	0.00127	1799.33	0.00142	719.732	0.00106	3598.66	0.00163	1439.46	0.00136	7197.32	0.00107
451.505	0.0016	722.408	0.00203	722.408	0.00183	541.806	0.00103	1083.61	0.00127	1806.02	0.0014	722.408	0.00105	3612.04	0.00161	1444.82	0.00145	7224.08	0.00102
453.177	0.00137	725.084	0.00181	725.084	0.00181	543.813	0.00102	1087.62	0.00109	1812.71	0.00157	725.084	0.000895222	3625.42	0.00161	1450.17	0.00129	7250.84	0.00107
454.849	0.00149	727.759	0.00197	727.759	0.00205	545.819	0.00117	1091.64	0.00123	1819.4	0.00152	727.759	0.0011	3638.8	0.00166	1455.52	0.00138	7277.59	0.000992222
456.522	0.00152	730.435	0.00187	730.435	0.00183	547.826	0.00108	1095.65	0.00107	1826.09	0.00136	730.435	0.00111	3652.17	0.00157	1460.87	0.0014	7304.35	0.001
458.194	0.00139	733.11	0.00169	733.11	0.00175	549.833	0.000966556	1099.67	0.00113	1832.78	0.00152	733.11	0.000895222	3665.55	0.00167	1466.22	0.00138	7331.1	0.00117
459.866	0.00127	735.786	0.00191	735.786	0.0018	551.839	0.00105	1103.68	0.00103	1839.46	0.00124	735.786	0.000945222	3678.93	0.00143	1471.57	0.00152	7357.86	0.00107
461.538	0.00143	738.462	0.00177	738.462	0.00168	553.846	0.00116	1107.69	0.00108	1846.15	0.0013	738.462	0.000945222	3692.31	0.00134	1476.92	0.00133	7384.62	0.00103
463.211	0.00136	741.137	0.00175	741.137	0.00186	555.853	0.00103	1111.71	0.00106	1852.84	0.00137	741.137	0.000775222	3705.69	0.0017	1482.27	0.00114	7411.37	0.00104
464.883	0.00122	743.813	0.0018	743.813	0.00156	557.86	0.000936556	1115.72	0.001	1859.53	0.00144	743.813	0.000905222	3719.06	0.00168	1487.62	0.00134	7438.13	0.000942222
466.555	0.00146	746.488	0.00178	746.488	0.00186	559.866	0.00101	1119.73	0.00114	1866.22	0.00137	746.488	0.000995222	3732.44	0.0017	1492.98	0.0013	7464.88	0.000912222
468.227	0.00124	749.164	0.00175	749.164	0.00157	561.873	0.00104	1123.75	0.00105	1872.91	0.00148	749.164	0.000855222	3745.82	0.00158	1498.33	0.00126	7491.64	0.00111
469.9	0.00152	751.839	0.00168	751.839	0.00192	563.88	0.00106	1127.76	0.00116	1879.6	0.00143	751.839	0.000855222	3759.2	0.0016	1503.68	0.0013	7518.4	0.00106
471.572	0.00148	754.515	0.0017	754.515	0.00161	565.886	0.000956556	1131.77	0.00113	1886.29	0.00134	754.515	0.000975222	3772.57	0.00175	1509.03	0.00154	7545.15	0.000932222
473.244	0.00134	757.191	0.00164	757.191	0.00166	567.893	0.000846556	1135.79	0.00109	1892.98	0.00144	757.191	0.000975222	3785.95	0.00159	1514.38	0.00125	7571.91	0.00104
474.916	0.0012	759.866	0.00189	759.866	0.00149	569.9	0.000846556	1139.8	0.00115	1899.67	0.00127	759.866	0.000835222	3799.33	0.00142	1519.73	0.00113	7598.66	0.000962222
476.589	0.00137	762.542	0.00191	762.542	0.00174	571.906	0.000936556	1143.81	0.000960667	1906.35	0.00131	762.542	0.000975222	3812.71	0.00153	1525.08	0.00142	7625.42	0.0011
478.261	0.00127	765.217	0.00185	765.217	0.00153	573.913	0.00103	1147.83	0.000970667	1913.04	0.00127	765.217	0.000865222	3826.09	0.00177	1530.44	0.00115	7652.17	0.000892222
479.933	0.00139	767.893	0.00185	767.893	0.00168	575.92	0.000906556	1151.84	0.00103	1919.73	0.00121	767.893	0.00108	3839.47	0.00154	1535.79	0.00119	7678.93	0.000892222
481.605	0.00131	770.569	0.00176	770.569	0.0018	577.926	0.000776556	1155.85	0.00113	1926.42	0.00131	770.569	0.000785222	3852.84	0.00144	1541.14	0.00144	7705.69	0.00112
483.278	0.00126	773.244	0.00193	773.244	0.00173	579.933	0.00112	1159.87	0.00126	1933.11	0.00137	773.244	0.000835222	3866.22	0.00151	1546.49	0.00128	7732.44	0.000982222
484.95	0.00133	775.92	0.00174	775.92	0.0018	581.94	0.00107	1163.88	0.000950667	1939.8	0.00158	775.92	0.000885222	3879.6	0.00151	1551.84	0.00137	7759.2	0.000842222
486.622	0.00126	778.595	0.0017	778.595	0.00186	583.946	0.000996556	1167.89	0.00121	1946.49	0.00145	778.595	0.000795222	3892.98	0.00153	1557.19	0.00119	7785.95	0.000832222
488.294	0.00101	781.271	0.00169	781.271	0.00151	585.953	0.00103	1171.91	0.000980667	1953.18	0.00124	781.271	0.000885222	3906.35	0.00177	1562.54	0.00129	7812.71	0.001
489.967	0.00132	783.946	0.00165	783.946	0.00175	587.96	0.000896556	1175.92	0.00102	1959.87	0.00124	783.946	0.000835222	3919.73	0.00154	1567.89	0.00118	7839.46	0.000952222
491.639	0.00114	786.622	0.00176	786.622	0.00159	589.967	0.000936556	1179.93	0.00103	1966.56	0.00133	786.622	0.000805222	3933.11	0.00165	1573.24	0.00119	7866.22	0.000902222
493.311	0.00109	789.298	0.00169	789.298	0.00184	591.973	0.000906556	1183.95	0.000920667	1973.24	0.00136	789.298	0.000815222	3946.49	0.00158	1578.59	0.00112	7892.98	0.00102
494.983	0.00131	791.973	0.00161	791.973	0.00175	593.98	0.000826556	1187.96	0.00103	1979.93	0.00128	791.973	0.000885222	3959.87	0.0015	1583.95	0.00133	7919.73	0.000912222
496.656	0.00109	794.649	0.00167	794.649	0.00164	595.987	0.000836556	1191.97	0.00107	1986.62	0.00138	794.649	0.000865222	3973.24	0.00141	1589.3	0.00111	7946.49	0.000872222
498.328	0.00128	797.324	0.0015	797.324	0.00183	597.993	0.000926556	1195.99	0.000950667	1993.31	0.00122	797.324	0.000805222	3986.62	0.00151	1594.65	0.00114	7973.24	0.000812222
500	0.00137	800	0.00143	800	0.00163	600	0.000916556	1200	0.000840667	2000	0.00147	800	0.000975222	4000	0.00132	1600	0.00104	8000	0.000772222

[truncated: 2 more sheets: Dataset 10, Dataset 11]
